# Supplementary material for: Increasing β-catenin/Wnt3A activity levels drive mechanical strain-induced cell cycle progression through mitosis
Source: eLife journal article supplement (doi:10.7554/elife.19799), 2016-10-26
Supplement: supp [file elife-19799-supp-v1.zip]

Archive with 27 entries (27 files):
- elife_poa_e19799_Figure_3_figure_supplement_1.pdf
- elife_poa_e19799_Figure_7_figure_supplement_1.pdf
- elife_poa_e19799_Figure_1_figure_supplement_1.pdf
- elife_poa_e19799_Figure_1_figure_supplement_2.pdf
- elife_poa_e19799_Video_1.avi
- elife_poa_e19799_Figure_3_figure_supplement_2.pdf
- elife_poa_e19799_Video_6.avi
- elife_poa_e19799_Video_4.avi
- elife_poa_e19799_Figure_6_source_data_1.xlsx
- elife_poa_e19799_Video_5.avi
- elife_poa_e19799_Figure_3_figure_supplement_3.pdf
- elife_poa_e19799_Video_7.avi
- elife_poa_e19799_Figure_4_figure_supplement_1.pdf
- elife_poa_e19799_Figure_2_source_data_1.xlsx
- elife_poa_e19799_Figure_1_source_data_1.xlsx
- elife_poa_e19799_Figure_4_source_data_1.xlsx
- elife_poa_e19799_Figure_3_figure_supplement_5.pdf
- elife_poa_e19799_Video_10.avi
- elife_poa_e19799_Video_2.avi
- elife_poa_e19799_Figure_5_source_data_1.xlsx
- elife_poa_e19799_Figure_8_source_data_1.xlsx
- elife_poa_e19799_Video_9.avi
- elife_poa_e19799_Figure_3_figure_supplement_4.pdf
- elife_poa_e19799_Video_3.avi
- elife_poa_e19799_Video_8.avi
- elife_poa_e19799_Figure_3_source_data_1.xlsx
- elife_poa_e19799_Figure_7_source_data_1.xlsx
