# Supplementary material for: Increasing β-catenin/Wnt3A activity levels drive mechanical strain-induced cell cycle progression through mitosis
Source: eLife journal article supplement (doi:10.7554/elife.19799), 2016-10-26
Supplement: supp [file elife-19799-supp-v1.zip › elife_poa_e19799_Figure_1_source_data_1.xlsx]

## Sheet: Figure 1C
% Cells Geminin Positive
Figure 1C
Collected from 2-3 Independent Experiments (multiple movie fields per experiment)
	Condition	Average # of Cells detected per movie frame	0 Hour	1 Hour	2 Hours	3 Hours	4 Hours	5 Hours	6 Hours	7 Hours	8 Hours	9 Hours	10 Hours	11 Hours	12 Hours	13 Hours	14 Hours	15 Hours	16 Hours	17 Hours	18 Hours	19 Hours	20 Hours	21 Hours	22 Hours	23 Hours	24 Hours
	DMSO - No Strain - 1	2021.3	10.5516	11.6082	12.3136	12.5341	12.9223	11.9174	11.5086	11.5266	11.552	10.9541	10.7396	10.7972	10.5755	10.8016	11.0678	11.127	10.6443	11.0345	10.8716	10.126	10.0398	9.78686	10.1449	10.09	10.01
	DMSO - No Strain - 2	1480	9.37294	8.74848	8.95785	8.25921	8.97651	10.1075	11.0335	9.73922	10.335	10.9012	9.18367	10.6865	10.6061	10.0459	10.8272	10.7465	10.5263	10.7093	10.6746	9.65812	8.64198	7.41436	7.49186	7.08333	7.03704
	DMSO - No Strain - 3	1667.4	10.4963	10.647	10.0731	10.2502	11.4794	10.7867	9.59079	9.41558	9.11392	8.63971	8.63132	9.26276	9.14286	9.75143	9.81964	9.3423	9.54617	9.12698	9.92794	10.1051	9.94475	10.6399	10.7843	11.8736	12.1445
	DMSO - No Strain - 4	1879.6	8.83418	7.8707	8.08424	7.15278	7.14286	6.80317	6.65509	7.31707	7.81832	6.73401	6.86483	6.68869	7.64064	7.45543	7.21817	6.28981	7.07965	7.60518	7.60959	7.80526	7.52688	8.08664	7.8125	8.05271	7.61636
	DMSO - No Strain - 5	1920.64	8.8716	8.83281	8.34621	8.48765	8.33333	7.94358	8.81226	9.24488	8.73724	9.46143	10.2096	9.24025	8.41889	8.68385	8.87818	8.38531	8.35031	8.79044	9.00901	8.89047	9.25926	9.68883	9.32025	10.1173	10.4669
	DMSO - No Strain - 6	1841.9	12.5893	10.1695	10.2993	10.0437	11.5162	10.864	10.6412	9.82143	10.0683	9.55932	8.76954	8.90603	9.5537	9.61938	8.9172	9.23836	9.27247	9.32081	9.30556	9.57668	9.79706	10.0137	9.49721	9.56341	9.45853
	DMSO - No Strain - 7	1750	13.5774	12.7737	13.2783	13.0979	13.3935	12.3816	11.8528	13.6808	13.4299	12.077	12.4484	12.7517	12.8594	13.3832	12.8143	12.4898	12.8329	11.6402	11.0932	10.8934	11.138	9.74513	9.84615	9.97662	10.3957
	DMSO - No Strain - 8	1492.84	11.6822	11.1444	11.4909	11.5679	10.8418	11.6959	10.8355	10.1297	9.80149	8.86792	10.1316	10.7893	9.95542	9.72669	8.58688	9.22535	8.25083	8.48995	9.55364	8.53495	9.43526	8.70419	9.20564	9.13183	9.55975
	DMSO - No Strain - 9	1376.24	7.22802	8.17791	7.43802	7.98742	9.32452	8.75689	9.6571	10.952	10.3846	10.5114	10.8714	10.4668	11.149	11.5135	9.10683	10.8824	10.2029	11.1858	12.4235	11.5361	12.4387	11.9512	12.8112	12.625	12.8659
	DMSO - No Strain - 10	1351.2	8.04249	8.78963	9.10345	9.1954	9.47902	10.1116	9.30818	9.23845	8.98275	8.37549	7.47801	7.71605	7.76583	8.00942	7.57845	8.03357	8.76321	7.77085	7.60266	9.17843	8.8646	8.67948	9.30233	10.3796	9.46987
	DMSO - No Strain - 11	1407.5	8.3167	8.19342	8.76055	8.43061	8.5389	8.6262	8.16832	7.79867	7.19352	7.55487	7.10997	8	7.89729	8.16733	7.84798	8.3254	8.16929	8.3926	8.26886	9.34625	9.63542	10.1348	10.3466	10.7251	9.73783
	DMSO - No Strain - 12	1347.4	8.22864	8.57143	8.16078	7.71513	7.94393	7.68322	7.75103	8.20652	7.85679	8.14076	7.63322	7.52438	7.66917	8.31155	8.34598	8.93417	9.25342	9.59446	8.96794	8.71895	8.78312	9.11708	9.2847	9.37069	9.37925
	DMSO - No Strain - 13	1331.16	8.20124	7.70218	8.01551	7.71684	8.01051	7.41641	7.71192	7.33154	6.4347	6.45328	7.06076	6.73989	7.31847	6.92042	7.18458	6.40956	6.22631	6.18926	6.13046	6.88652	6.69536	6.87303	6.43103	7.00252	7.2973
	DMSO - No Strain - 14	1452.88	9.13272	9.33998	9.00791	9.36375	8.7402	9.2638	9.45783	9.16245	9.0549	8.667	9.18142	9.30365	8.89552	8.45154	8.44327	8.43558	9.18071	8.65215	9.06878	8.77955	8.87145	9.41109	9.96462	10.8608	9.73995
	Average		9.65181	9.46923	9.52356	9.41447	9.7602	9.597	9.49886	9.54035	9.34024	9.0641	9.02239	9.20522	9.24627	9.3458	9.04545	9.13322	9.16419	9.17875	9.32196	9.28827	9.36226	9.30331	9.44595	9.77517	9.65563
	SEM		0.50102	0.415102	0.468457	0.498154	0.519244	0.479273	0.417179	0.460042	0.483983	0.43695	0.453853	0.471242	0.435386	0.462504	0.429451	0.465384	0.43459	0.412611	0.437773	0.318911	0.374457	0.350202	0.409664	0.43063	0.4359
	DMSO - High Strain - 1	1673.2	8.48297	10.3222	11.2903	10.3563	10.2455	10.3179	10.1669	9.9505	10.0877	10.7177	11.143	11.47	13.2591	14.481	16.7286	20	23.8424	21.5764	20.6897	22.18	22.42	23.34	25.56	26.7	27.82
	DMSO - High Strain - 2	1697.4	8.41977	9.56316	10.1508	10.8583	12.1097	10.7861	9.53206	10.8297	11.5918	12.7995	14.4073	15.66	16.3709	18.3781	19.035	21.0888	22.122	24.6539	25.2874	27.0685	28.5636	29.9278	31.3589	31.45	30.45
	DMSO - High Strain - 3	1474.6	9.27152	10.9199	10.7289	11.9271	13.6525	12.7914	12.7392	12.6793	12.7924	21.2056	21.0986	23.4491	24.9697	26.4106	31.9149	28.1796	17.0642	20.9003	23.3596	24.3863	20.155	21.2188	29.3869	31	32.2667
	DMSO - High Strain - 4	1248	13.7009	16.0667	16.2679	15.6802	17.4536	15.413	15.1297	14.7037	15.6078	16.4495	16.488	16.5316	17.0142	17.6805	17.7344	18.1744	19.2459	20.2256	20.4878	21.6818	22.807	22.4026	23.9601	25.4839	25.7862
	DMSO - High Strain - 5	1290	12.3917	13.991	13.835	13.3333	14.0673	13.5581	14.1089	14.4915	15.0165	14.5899	14.4578	14.4893	15.3968	14.8649	14.9083	15.7816	17.244	16.5343	18.1154	18.1479	19.3333	20.2256	19.1142	20	21.9041
	DMSO - High Strain - 6	1422.6	9.6307	12.0603	12.3404	13.0507	13.0142	12.0363	12.3644	12.1508	11.8962	12.0397	12.3769	13.1203	14.0041	14.1477	16.1269	16.39	17.4966	17.5704	18.7544	19.6119	21.1836	22.8399	23.9145	25.4167	27.7041
	Average		10.3163	12.1539	12.4356	12.5343	13.4238	12.4838	12.3402	12.4676	12.8321	14.6337	14.9953	15.7867	16.8358	17.6604	19.408	19.9357	19.5025	20.2435	21.1157	22.1794	22.4104	23.3258	25.5491	26.6751	27.6552
	SEM		0.899674	1.00472	0.932719	0.790007	0.978134	0.765995	0.88841	0.780168	0.864559	1.5483	1.43538	1.7001	1.72521	1.89159	2.56616	1.84594	1.16664	1.19113	1.11939	1.31487	1.34262	1.39912	1.78033	1.72303	1.47958

## Sheet: Figure 1D
# Mitotic Events per .1 mm square
Figure 1D
Collected from 2-3 Independent Experiments (multiple movie fields per experiment)
	Condition	DMSO - No Strain - 1	DMSO - No Strain - 2	DMSO - No Strain - 3	DMSO - No Strain - 4	DMSO - No Strain - 5	DMSO - No Strain - 6	DMSO - No Strain - 7	DMSO - No Strain - 8	DMSO - No Strain - 9	DMSO - No Strain - 10	DMSO - No Strain - 11	DMSO - No Strain - 12	DMSO - No Strain - 13	DMSO - No Strain - 14	Average	SEM		DMSO - High Strain - 1	DMSO - High Strain - 2	DMSO - High Strain - 3	DMSO - High Strain - 4	DMSO - High Strain - 5	DMSO - High Strain - 6	Average	SEM
	1 Hour	0.232558	0.930233	1.16279	0.697674	0.697674	0.697674	0.465116	0.930233	1.16279	0.930233	0.465116	1.86047	1.16279	1.39535	0.913621	0.112946		0.930233	0.930233	0	0.697674	0.930233	0.465116	0.658915	0.152104
	2 Hours	1.16279	0.232558	0.465116	2.55814	1.62791	0.930233	0.930233	0.930233	0.697674	0.697674	0.697674	2.09302	1.16279	0.930233	1.07973	0.168208		0.232558	0.465116	0.465116	0.697674	1.62791	0.465116	0.658915	0.202888
	3 Hours	1.62791	0	0.232558	1.62791	0.930233	1.86047	1.39535	0.930233	1.62791	2.09302	0.697674	1.62791	1.86047	1.39535	1.27907	0.16846		2.09302	2.32558	0	0.697674	1.86047	0	1.16279	0.433
	4 Hours	1.39535	0	0.930233	1.39535	1.16279	0.930233	0.697674	0.930233	1.86047	0.930233	1.62791	0.697674	1.39535	1.86047	1.12957	0.135422		2.7907	2.7907	0.232558	0.232558	0.930233	1.39535	1.39535	0.476602
	5 Hours	0.930233	0	1.39535	1.16279	1.86047	1.86047	1.16279	0.930233	2.32558	2.09302	0.697674	1.39535	1.39535	1.39535	1.3289	0.160657		1.39535	1.16279	0.697674	0.465116	1.39535	0.697674	0.968992	0.163527
	6 Hours	1.39535	0	0.930233	2.09302	1.16279	0.930233	2.09302	1.86047	2.09302	1.62791	1.16279	1.62791	1.86047	2.09302	1.49502	0.163017		0.697674	1.39535	0	1.39535	2.09302	1.16279	1.12403	0.290568
	7 Hours	1.39535	0	0.930233	1.86047	1.86047	1.86047	0	0.697674	2.7907	0.930233	1.86047	1.39535	1.39535	1.39535	1.31229	0.203394		2.09302	1.86047	0.465116	0.930233	1.39535	0.930233	1.27907	0.252979
	8 Hours	0.465116	0	1.86047	0.465116	0.930233	0.930233	0.930233	1.16279	1.16279	0.697674	0.465116	1.16279	0.930233	0.465116	0.830565	0.121195		1.39535	2.55814	0	0.232558	0.697674	0	0.813953	0.41056
	9 Hours	1.39535	0.232558	1.62791	0.697674	0.697674	1.86047	1.16279	0.232558	1.39535	1.16279	0.232558	1.39535	1.16279	0.930233	1.01329	0.141327		3.48837	2.55814	0.465116	0.232558	0.930233	0.232558	1.31783	0.562216
	10 Hours	1.86047	0.232558	1.16279	1.39535	0.697674	0.232558	0.930233	0.697674	1.39535	1.39535	0.232558	0.697674	1.39535	0.465116	0.913621	0.141027		1.86047	2.09302	1.16279	0.697674	0.465116	0.232558	1.08527	0.310078
	11 Hours	1.86047	0	2.09302	1.39535	1.39535	1.62791	0.930233	0.930233	1.39535	1.62791	0.930233	1.86047	1.39535	1.16279	1.3289	0.140952		2.09302	2.55814	0.465116	0.465116	0.232558	0.697674	1.08527	0.401308
	12 Hours	1.16279	0.232558	0.697674	1.39535	0.930233	1.39535	0.930233	0.232558	0.930233	0.465116	0.465116	1.39535	1.86047	0.930233	0.930233	0.129		0.465116	1.39535	0.697674	0.232558	0.697674	0.697674	0.697674	0.158867
	13 Hours	0.697674	0	2.09302	1.86047	1.86047	1.62791	1.39535	1.39535	0.697674	1.16279	0.465116	0.697674	0.465116	0.232558	1.04651	0.178731		2.09302	1.62791	0.465116	0	0.465116	0.232558	0.813953	0.34363
	14 Hours	1.86047	0.232558	1.16279	0.930233	1.39535	1.16279	1.62791	1.39535	0.465116	1.16279	0.697674	0.930233	1.16279	0.232558	1.0299	0.130635		2.55814	1.62791	0.232558	0.697674	0	0	0.852713	0.423173
	15 Hours	1.62791	0	0.697674	1.86047	1.62791	1.62791	0.930233	1.16279	1.16279	0.697674	0.697674	0.465116	1.39535	0.465116	1.0299	0.147716		1.39535	1.62791	0	0.465116	0.465116	0.232558	0.697674	0.268535
	16 Hours	1.86047	0	1.16279	0.930233	1.16279	1.62791	1.16279	1.62791	1.86047	0.930233	0.930233	0.697674	1.39535	0.465116	1.12957	0.141852		1.16279	1.62791	0.465116	0.697674	0.232558	0.232558	0.736434	0.227991
	17 Hours	1.62791	0	0.930233	1.86047	1.86047	1.62791	0.930233	1.62791	1.62791	0.697674	0.930233	1.16279	0.930233	1.16279	1.21262	0.140423		1.86047	1.39535	0.465116	0.232558	0.697674	0.465116	0.852713	0.259429
	18 Hours	0.930233	0.465116	1.62791	1.62791	1.39535	1.39535	1.62791	1.86047	0.930233	0.465116	1.86047	0.697674	1.16279	0.697674	1.19601	0.133209		2.55814	3.02326	0.930233	0.697674	0	0.697674	1.31783	0.486585
	19 Hours	2.09302	0	1.86047	0.465116	0.697674	0.697674	2.09302	0.697674	1.16279	1.62791	0.465116	0.232558	1.86047	0.465116	1.0299	0.196115		0.7	1.16279	0.697674	0.232558	0.697674	0.232558	0.620543	0.142981
	20 Hours	1.62791	0.232558	0.465116	0.465116	2.09302	1.39535	1.86047	1.16279	1.86047	1.16279	1.62791	2.09302	1.39535	0.465116	1.27907	0.171952		0.82	1.62791	0.930233	0.232558	0.465116	0.930233	0.834341	0.195517
	21 Hours	1.86047	0	1.16279	0.465116	0.930233	1.16279	0.232558	2.09302	0.465116	0.930233	0.697674	1.16279	1.62791	0.697674	0.963455	0.161447		0.75	1.16279	0.697674	0.465116	0.930233	0.697674	0.783915	0.097059
	22 Hours	1.62791	0.465116	1.16279	0.697674	0.697674	2.09302	1.86047	1.39535	0.465116	0.930233	1.62791	0.930233	0.465116	1.16279	1.11296	0.144594		1.45	1.39535	0.465116	0.465116	0.697674	0.465116	0.823062	0.193275
	23 Hours	1.16279	0	1.16279	1.39535	0.465116	1.16279	1.16279	2.09302	1.39535	1.62791	1.39535	1.62791	0.465116	0.697674	1.12957	0.148003		1.13	0.45	0.232558	0.930233	0.232558	1.16279	0.68969	0.17804
	24 Hours	2.32558	0.232558	0.930233	0.697674	0.465116	0	0.930233	0.465116	0.697674	1.86047	1.16279	1.86047	1.39535	0.697674	0.980066	0.179442		1.2	1.2	0.232558	0.232558	0.697674	1.16279	0.787597	0.191933

## Sheet: Figure 1E
Single Cell Tracking of Geminin Positive Cells
Figure 1E
Collected from 2-3 Independent Experiments (multiple movie fields per experiment)
	Condition	Number of Geminin-Positive Objects Detected	G1 to S Objects	G1 to S to M Objects			<= # of Objects was normalized to number of geminin-positive objects in first frame of movie
	DMSO - No Strain - 1	315	1.06	0.29
	DMSO - No Strain - 2	315	0.94	0.31
	DMSO - No Strain - 3	356	1.34	0.24
	DMSO - No Strain - 4	381	1.37	0.21
	DMSO - No Strain - 5	347	1.36	0.31
	DMSO - No Strain - 6	243	1.08	0.17
	DMSO - No Strain - 7	429	0.94	0.13
	DMSO - No Strain - 8	354	0.78	0.19
	DMSO - No Strain - 9	381	1.12	0.188
	DMSO - No Strain - 10	388	0.87	0.2
	DMSO - No Strain - 11	468	0.65	0.19
	DMSO - No Strain - 12	337	1.26	0.28
	DMSO - No Strain - 13	337	1.1	0.27
	DMSO - No Strain - 14	423	1.02	0.18
	Average		1.06357	0.225571
	SEM		0.0585034	0.0153153
	DMSO - High Strain - 1	231	1.22	0.05
	DMSO - High Strain - 2	209	2.09	0.17
	DMSO - High Strain - 3	282	2.09	0.14
	DMSO - High Strain - 4	279	2.81	0.11
	DMSO - High Strain - 5	719	6.97	0.28
	DMSO - High Strain - 6	408	2.81	0.27
	Average		2.99833	0.17
	SEM		0.829813	0.0369685

## Sheet: Fig.1 - Supplement 1D
Experiment: Bead Calibration of Live Strain Device
Figure 1 - Supplement 1D
Collected from 3 Independent Experiments
	Vacuum Pressure	1 in Hg	2 in Hg	3 in Hg	4 in Hg	5 in Hg	6 in Hg	7 in Hg	8 in Hg	9 in Hg	10 in Hg	11 in Hg	12 in Hg	13 in Hg	14 in Hg	15 in Hg	16 in Hg	17 in Hg	18 in Hg	19 in hg
	Average	0.613333	1.70667	2.36	3.05667	3.68667	4.26667	4.76667	5.18	5.60667	6.08	6.39667	6.75333	7.01333	7.23667	7.51	7.60333	7.91	8.02667	8.36333
		0.72	1.33	1.84	2.47	3.02	3.47	3.91	4.18	4.57	5.01	5.35	5.57	5.83	5.92	6.02	6.11	6.23	6.27	6.36
		1.06	1.92	2.78	3.36	4	4.74	5.22	5.73	6.43	6.98	7.25	7.82	8.17	8.68	9.2	9.5	10.08	10.39	11.16
		0.06	1.87	2.46	3.34	4.04	4.59	5.17	5.63	5.82	6.25	6.59	6.87	7.04	7.11	7.31	7.2	7.42	7.42	7.57

## Sheet: Fig.1 - Supplement 1F
Experiment: Distance to Nearest Neighbor Calibration of Live Strain Device
Figure 1 - Supplement 1F
Collected pooled from 5 Independent Experiments
	Vacuum Pressure	0 in Hg	19 in Hg
	Average DistToNN	17.2194	18.7125
	SEM	0.0415709	0.126512
	# of Cells Detected and Analyzed by MATLAB Script (N)	8142	6943
	Raw Data output extends downward from here…	24.7081	21.9482
		17.1348	27.4811
		16.9844	29.3581
		15.5979	31.392
		22.805	16.6247
		23.9626	18.5801
		23.3347	18.4493
		47.0095	20.8168
		19.3061	36.2447
		32.216	35.643
		21.7782	21.6409
		25.8134	17.8607
		24.2634	42.7389
		22.2949	22.5826
		14.9897	30.6007
		13.2108	22.7003
		14.5057	18.482
		26.1011	25.99
		24.1915	14.4796
		19.2407	20.1824
		33.3671	16.7947
		15.4213	17.2721
		15.9903	17.0956
		29.6589	15.6568
		17.2591	17.2918
		32.7785	17.8607
		22.7003	49.6582
		20.5814	16.0753
		17.3572	19.9862
		19.5415	15.4017
		16.1996	28.8872
		19.8947	16.5462
		15.4736	23.2432
		13.1062	24.1261
		15.2578	23.7206
		19.947	15.7222
		22.0006	17.9981
		13.4397	19.2211
		35.0152	23.387
		13.9367	50.7308
		16.1996	23.8645
		18.397	22.2033
		14.7281	40.1098
		14.5515	19.136
		22.0725	17.9915
		19.8227	20.2936
		21.1438	17.2264
		15.2251	22.7592
		18.5605	40.9273
		21.6866	17.4095
		21.5885	36.2447
		16.8863	22.6676
		14.5123	25.9115
		16.4089	20.9934
		19.9274	18.5605
		19.9928	18.3316
		21.6932	16.6966
		30.7838	18.397
		17.4422	35.4599
		15.9118	20.1367
		21.1831	15.1205
		15.4213	25.8657
		15.866	18.0373
		19.9928	23.4851
		29.9467	25.2967
		20.5421	24.0737
		16.52	40.1883
		20.8822	19.6723
		22.8638	44.4655
		18.3251	17.0236
		23.1058	15.611
		16.6051	16.193
		15.9249	15.853
		31.7844	18.809
		20.843	25.2444
		18.9071	19.2995
		14.3618	19.1687
		27.0887	14.5253
		18.8025	22.0136
		23.8383	23.374
		20.9542	26.5851
		20.4244	21.1504
		20.9084	17.1283
		20.431	18.7371
		20.5814	14.9439
		21.8567	24.9697
		15.3755	17.7103
		14.0479	16.3435
		18.1812	21.6212
		13.7667	24.2111
		18.2924	22.8704
		22.9554	16.7228
		19.1033	25.1855
		17.828	16.4416
		17.9588	22.1902
		17.6384	15.8922
		20.1563	17.0825
		20.6402	16.847
		34.9301	26.1469
		15.5063	16.0753
		19.3519	18.6848
		17.828	17.5076
		15.5129	20.2609
		21.1961	16.1146
		14.2703	18.5867
		21.6147	15.3232
		20.5748	21.1634
		15.4082	20.2871
		24.6427	17.3375
		20.9999	15.9903
		15.7287	16.2846
		15.127	17.7038
		19.5873	18.2139
		14.388	19.5154
		24.7474	17.1544
		16.6966	21.752
		15.6829	18.0635
		15.938	16.5658
		14.0283	17.0302
		14.4534	18.312
		17.7038	15.0943
		18.1877	28.5994
		16.1015	17.2394
		15.6568	16.8994
		17.573	15.4344
		15.8268	14.3488
		19.9405	17.5534
		16.3958	16.0688
		19.6854	17.1413
		16.4873	15.8726
		16.4808	26.3693
		13.5443	22.975
		15.0485	21.7455
		25.6106	15.9184
		14.4665	17.6842
		14.5646	24.9239
		34.2761	39.4231
		15.7549	15.2513
		16.4416	14.6758
		14.2376	14.2049
		36.0223	13.904
		15.3755	21.9875
		14.6561	18.2597
		23.6421	16.2257
		20.6337	18.1354
		15.938	17.2721
		19.1884	15.5848
		15.0878	13.891
		32.5823	13.5574
		22.4191	16.1734
		13.3481	15.9968
		33.3409	18.6455
		12.6091	19.535
		16.0949	17.1086
		13.3285	16.6508
		20.032	19.8881
		15.1009	14.0872
		16.2192	23.9691
		16.6574	14.2964
		14.8523	12.426
		13.3808	16.6051
		17.9392	25.0547
		27.311	33.269
		14.2768	18.5801
		14.1656	12.6941
		18.0504	18.6717
		14.1002	13.9302
		15.3232	15.9314
		15.0551	16.7097
		13.0604	18.2204
		17.8804	16.193
		21.0653	14.3488
		14.872	13.3612
		11.615	13.4724
		15.3625	41.4571
		29.2665	15.369
		16.5724	26.5655
		16.0884	17.6907
		16.6508	13.8583
		22.3603	16.3238
		14.6561	18.881
		13.9956	16.2323
		12.5895	16.4219
		15.4998	12.9754
		14.6431	19.4761
		14.9308	25.4341
		21.8828	33.2886
		23.3086	15.6764
		13.1977	18.5082
		13.5182	15.9707
		15.9641	22.3406
		32.7327	18.4886
		16.9255	18.3251
		14.9047	14.4142
		14.3553	15.9314
		14.6234	13.5574
		30.1363	17.7496
		11.8897	17.0236
		17.7103	17.1544
		22.5499	16.5004
		14.1722	18.7109
		15.1009	18.5736
		16.7097	33.0335
		16.4089	16.2061
		14.8131	16.0492
		14.6823	15.4867
		20.6402	16.5135
		16.8797	14.7869
		16.6574	16.5135
		15.3886	14.1264
		16.4416	15.7614
		15.9184	15.9184
		18.554	19.4957
		20.104	18.4886
		14.2114	17.4422
		29.4823	19.0379
		15.6698	18.3709
		14.3945	15.6568
		15.9641	15.9184
		16.7032	16.2257
		14.8327	16.1473
		14.0675	36.9379
		12.995	17.8411
		14.5384	18.0046
		19.9143	17.7103
		26.5916	15.2905
		17.1413	22.1641
		19.45	20.771
		22.1117	15.454
		16.4677	17.1479
		14.3291	16.2846
		17.5207	18.8483
		14.4272	18.1223
		14.9766	28.0304
		14.5384	15.9118
		14.1199	16.3369
		17.2983	19.777
		17.2591	19.1818
		15.7941	15.2644
		19.62	17.8542
		15.2774	17.174
		13.8583	19.8947
		18.7502	13.649
		14.388	19.0772
		15.7483	16.7424
		16.0492	27.8931
		18.4755	14.1133
		21.4643	22.7788
		14.473	15.6371
		14.4272	22.7919
		14.957	15.8268
		19.9208	17.004
		14.3095	16.9844
		19.5023	17.6449
		16.8928	20.9607
		16.1015	17.7496
		24.4531	13.2304
		16.8863	18.6325
		13.5378	22.1902
		18.4559	15.9903
		16.2388	17.5207
		14.061	16.7293
		15.0878	15.4933
		14.0152	13.3743
		13.4266	14.6758
		15.4017	20.2348
		16.0165	15.2251
		15.1793	25.6433
		18.9006	15.5325
		18.2597	27.5334
		13.891	16.9778
		16.6835	17.8607
		15.4933	16.7162
		13.8517	17.9915
		14.6627	23.5113
		20.7514	18.1027
		14.1853	21.8828
		13.6621	15.1074
		22.4649	14.6169
		18.2139	14.2768
		17.3833	14.9308
		13.9367	18.0373
		24.5315	25.1005
		15.6306	16.8994
		16.0884	19.4761
		15.0551	19.3388
		14.872	15.0943
		15.6895	22.5238
		25.4471	20.4571
		16.3565	23.7402
		12.9557	19.0183
		13.0669	16.7686
		22.406	24.9632
		13.5182	16.1538
		12.6484	15.8464
		14.2114	26.5262
		15.8203	19.6331
		16.507	16.3696
		18.2074	16.6312
		19.9601	16.1473
		13.3089	15.6306
		13.564	18.9922
		14.6104	15.6371
		22.6415	16.4219
		15.1597	24.7343
		14.5384	17.8738
		14.2114	23.2432
		23.9299	20.516
		18.4755	21.7717
		15.1074	17.2983
		14.6234	17.1479
		12.6353	18.7044
		13.0865	16.2715
		17.9523	17.573
		13.6163	20.771
		13.9694	17.6122
		15.8726	16.5854
		22.0725	20.2871
		15.1401	17.7234
		16.0034	15.3625
		18.3709	18.9333
		15.5587	20.5225
		20.4048	14.6038
		16.3108	18.1877
		15.6568	22.3406
		16.762	20.2151
		18.8548	20.2021
		13.3416	18.0373
		15.454	16.3369
		20.0059	22.0921
		16.6705	21.1569
		14.6038	19.0706
		26.0815	20.6075
		28.1024	20.0451
		17.7953	18.2008
		15.5783	23.4786
		14.9439	17.1348
		14.7804	15.6437
		14.4076	21.8959
		15.4606	19.9535
		16.7424	18.724
		24.283	16.9124
		18.4101	17.1217
		23.7991	21.1961
		20.0582	23.7467
		17.0432	24.5904
		17.9981	15.8857
		16.919	14.4403
		14.4665	18.8875
		19.6789	16.592
		18.6455	21.5493
		18.4297	17.3441
		16.5331	16.5789
		15.0812	22.4322
		17.4749	18.724
		17.8607	14.7608
		15.127	20.5356
		20.8037	21.6343
		14.5842	20.8299
		17.7496	19.463
		15.1597	16.8013
		16.5135	15.1466
		13.9433	20.8757
		17.9261	18.7633
		21.0588	21.2092
		17.2133	14.7215
		14.7019	18.3512
		13.0996	17.6318
		18.7763	24.6035
		22.6022	20.516
		14.872	16.8143
		22.7657	17.4553
		20.2675	23.2039
		15.6241	20.3329
		15.611	22.6676
		14.7804	22.1837
		19.6396	19.1687
		15.0093	22.8246
		18.7371	14.4992
		21.8959	20.2348
		14.9047	26.3889
		22.0071	20.7056
		15.0355	21.255
		16.9909	20.9672
		15.212	18.3512
		18.4232	13.2566
		14.0283	21.7455
		16.7947	21.1373
		16.2388	23.9102
		20.3852	16.7816
		18.2204	25.1921
		15.7418	20.9018
		19.8162	23.9429
		16.3696	20.1497
		13.8059	22.3799
		16.0361	17.2525
		19.6789	16.9975
		19.7573	20.4964
		19.3911	20.9803
		15.0878	16.0753
		19.6004	21.3204
		18.0177	22.1379
		17.8738	19.8227
		18.6259	22.3603
		18.5605	19.6069
		22.2425	20.5094
		15.5979	21.9221
		16.4743	20.8103
		15.9184	17.4422
		19.1557	21.4904
		17.7757	18.5278
		16.0034	20.843
		14.3161	17.4945
		26.5459	17.174
		19.2865	21.6147
		16.5854	21.7259
		16.1669	29.1684
		20.5879	18.0962
		17.4749	23.0927
		18.6717	23.714
		16.7424	20.3983
		16.762	17.3768
		19.0576	14.8262
		20.5879	17.5926
		19.7704	20.5683
		17.1544	23.6094
		18.7306	23.7206
		21.1307	20.1628
		15.4344	14.7608
		15.9772	16.265
		17.985	17.9915
		18.2074	19.5611
		21.425	20.4375
		18.2858	22.6415
		16.7228	19.3976
		27.6315	19.9666
		15.866	18.5278
		15.5063	19.4957
		17.4226	16.7424
		18.9333	33.1316
		23.4786	21.1569
		16.0426	19.4173
		17.1283	15.8726
		18.1812	24.3746
		23.4328	20.359
		22.3472	36.3101
		21.2485	17.6515
		15.4475	29.8159
		18.4101	23.2432
		16.023	17.331
		18.7371	21.9025
		13.5509	15.0943
		14.6561	19.7116
		17.6972	17.0367
		20.7449	16.9255
		18.9333	19.2341
		17.3964	18.2074
		17.4749	15.9772
		19.6658	15.4802
		19.9339	22.1379
		19.1295	15.2251
		25.2248	18.809
		18.2924	25.6957
		17.1021	16.8732
		15.3886	17.2721
		18.0373	19.947
		19.9078	20.8364
		21.7913	21.8174
		17.8019	23.9495
		20.3132	17.6449
		25.3752	19.2014
		15.8268	20.6533
		17.2067	16.834
		13.8256	15.369
		16.7686	19.9601
		17.9719	14.9897
		17.5534	18.2335
		14.5319	15.1139
		15.369	19.7116
		15.4409	18.9137
		14.9243	24.2111
		21.0196	18.4428
		17.9719	19.8358
		17.331	18.469
		24.355	21.5624
		16.8667	24.9043
		15.4736	21.1896
		16.4285	16.2454
		18.1485	20.8168
		16.0361	15.8857
		19.777	19.4892
		18.3643	18.0766
		14.6954	22.6349
		17.7169	17.6907
		14.3161	22.7788
		14.2899	21.085
		15.0616	20.5487
		18.5801	20.3394
		21.412	18.6979
		18.2728	19.4173
		13.4528	20.0516
		15.4998	16.7555
		13.5901	21.255
		19.0772	27.5203
		15.1336	21.7913
		18.0373	22.0071
		18.6782	15.7549
		16.2846	17.2918
		17.1152	18.5801
		14.4796	19.8424
		23.3543	20.0255
		32.5692	17.0825
		20.2282	16.8732
		16.1211	19.9601
		22.3733	22.4649
		14.0937	23.8906
		16.8143	19.7181
		16.2846	22.8508
		18.6717	20.3983
		20.5225	17.1479
		17.7038	17.2329
		15.1924	21.1373
		16.9648	16.9975
		17.5664	15.6568
		19.4107	17.2918
		15.0485	14.9962
		18.5082	19.4892
		18.227	18.1093
		17.7365	20.8495
		18.3643	23.0012
		29.515	18.9137
		18.4363	23.7598
		25.2444	16.3696
		17.3179	24.8455
		16.3696	22.1117
		14.4796	17.5991
		20.1628	20.8691
		15.6241	19.463
		14.8785	18.6913
		17.4095	16.6901
		22.3864	17.2918
		15.5717	17.828
		15.2513	19.6723
		14.7739	22.0921
		15.6437	16.834
		16.1603	16.9124
		17.5861	22.5761
		21.2354	20.8561
		15.9053	15.7876
		15.6175	16.9582
		18.2531	17.6972
		20.1367	20.928
		18.9202	19.9601
		15.369	15.8726
		15.369	20.3459
		15.4802	14.5711
		18.881	24.767
		14.1853	17.0302
		13.7536	31.1042
		18.3185	16.2323
		18.5605	20.0255
		17.0432	21.5231
		14.8	16.4677
		15.1401	21.1569
		16.1538	17.6449
		19.5415	18.809
		15.0616	20.1432
		15.4671	18.3512
		16.3042	15.042
		21.1765	26.0357
		18.9071	15.3821
		18.5998	18.3905
		18.9071	16.4219
		15.2971	17.4683
		15.3232	32.7589
		14.6496	15.8399
		19.7704	17.0825
		19.5088	26.2058
		16.1996	14.7542
		14.0021	18.9856
		15.0551	16.1407
		15.526	16.0492
		15.9838	17.743
		17.0105	16.4939
		19.1949	16.5593
		15.5979	17.828
		17.7299	15.3494
		17.7692	21.9613
		18.9202	17.6057
		15.6044	22.3668
		18.7633	17.4814
		15.9184	28.933
		16.3958	32.857
		16.0622	13.0865
		15.0551	15.7483
		15.2055	17.9261
		28.1089	20.6075
		18.8614	16.6247
		14.3945	17.4683
		14.8	15.8857
		15.9903	16.2323
		14.8458	16.9386
		15.0812	16.5527
		15.6044	14.473
		16.919	13.734
		18.8548	21.5035
		13.3481	21.8632
		16.3762	18.4166
		16.4546	21.8763
		18.4101	26.6897
		16.5462	19.9535
		15.5848	16.2192
		20.6991	25.506
		16.2977	20.2805
		18.1158	14.0348
		16.6443	23.5767
		19.7639	20.7776
		13.6359	15.8072
		15.4344	13.0342
		16.4677	20.5356
		13.2827	14.2245
		13.9171	17.2525
		17.0498	22.7134
		15.3036	13.9694
		14.9897	12.7138
		15.7418	13.25
		16.2584	22.2818
		16.5331	17.8019
		15.938	18.881
		13.9106	18.1354
		16.6835	17.6188
		18.6979	16.834
		20.6141	17.8607
		29.2273	17.3441
		17.1152	17.7365
		13.0408	15.5063
		11.7328	19.463
		19.2668	19.2865
		17.3441	19.2734
		14.231	13.1192
		17.1086	19.5284
		15.9184	19.3846
		13.6294	15.1009
		17.1217	17.3899
		15.3036	24.4531
		13.237	14.8523
		20.274	16.4677
		15.7549	28.6321
		12.5568	21.2877
		15.3298	24.3157
		14.4992	21.3466
		15.7222	18.227
		19.0118	22.4714
		15.8987	15.5129
		18.07	22.0267
		20.3067	21.9613
		28.0762	23.8906
		18.0439	20.7449
		13.9694	19.0837
		16.5462	14.8262
		20.3132	19.6919
		15.1663	18.1289
		14.5777	17.2852
		14.0218	14.872
		11.8178	21.0457
		21.5428	21.9548
		15.0355	19.9535
		18.6325	18.5671
		14.7804	19.9993
		15.6044	14.7019
		11.5431	20.0059
		12.753	16.4023
		27.0102	18.2008
		13.8583	19.9274
		11.8897	15.853
		22.0202	20.4702
		16.5397	18.0373
		18.9333	17.0956
		17.3572	21.8567
		15.611	17.3441
		15.2578	18.6979
		16.4023	19.4892
		15.2578	17.161
		14.7085	22.8181
		13.8713	19.1491
		18.1223	17.7234
		14.7739	16.5266
		15.2317	17.1675
		11.9093	24.6558
		16.3827	16.0819
		16.0753	18.1877
		14.8654	16.1669
		17.1675	18.1877
		13.5901	20.8037
		15.6241	18.0242
		18.6652	18.9398
		15.5129	19.0314
		14.9308	18.0242
		15.9772	20.4048
		14.6758	19.5938
		13.3547	16.9386
		25.2444	15.9968
		19.79	17.0956
		15.5325	18.4951
		18.6259	20.4898
		20.2936	17.9915
		22.0006	15.0747
		17.0236	17.4618
		20.2151	20.3263
		13.9237	19.6396
		19.378	16.4154
		19.463	18.2335
		21.013	17.174
		16.9778	16.5266
		14.63	21.1111
		13.5313	17.5337
		16.2715	27.8212
		15.3232	24.2176
		13.2435	15.6829
		20.0386	23.4524
		15.6698	15.8464
		22.7003	15.2774
		16.7686	17.6842
		17.3768	21.2746
		13.1519	16.6247
		20.3329	16.435
		15.3101	19.0183
		16.3108	20.1759
		17.5272	21.3596
		15.4213	19.4042
		18.6259	18.0635
		15.8399	18.6325
		14.1068	18.0439
		17.6449	24.0607
		16.1669	21.5558
		15.2578	15.2447
		16.9059	16.0034
		19.1099	19.0445
		19.0903	21.9417
		22.1771	14.0348
		17.5337	21.6539
		16.0361	22.3341
		15.9576	16.5004
		22.0267	19.8227
		15.8006	17.3114
		13.3743	21.4512
		15.7614	15.0551
		17.7953	18.5474
		14.6823	15.3167
		14.7935	19.1884
		22.5892	17.2133
		16.5789	17.5991
		16.0819	16.0492
		15.7745	16.6705
		16.9909	21.8828
		22.7984	20.0778
		17.4356	15.042
		18.9071	18.0766
		18.1289	22.3668
		14.3226	17.4618
		16.5985	18.1093
		18.2074	15.3559
		18.4559	20.0647
		16.1538	20.9149
		36.055	19.8554
		13.6817	20.0778
		18.2335	15.7483
		25.1659	15.6895
		16.2781	15.6306
		14.7739	16.1407
		16.7032	16.4939
		15.5587	21.1111
		16.5135	21.3139
		19.9012	22.1248
		19.3192	17.4356
		13.8713	14.872
		16.1538	16.7489
		20.6795	24.8651
		14.0545	15.4082
		19.2145	15.7876
		18.8941	14.388
		15.3952	18.1223
		29.1422	17.1871
		14.8196	19.4238
		17.2264	16.6574
		15.9314	16.1342
		14.2834	19.6527
		19.2341	15.199
		18.5278	22.9031
		14.4599	18.1223
		16.8797	17.2852
		19.8554	16.6181
		36.4932	16.4154
		12.7661	15.9903
		17.0302	15.8857
		16.18	18.7436
		15.3298	19.8685
		16.7816	17.0956
		17.6318	18.6325
		20.5225	18.9791
		19.2799	17.4422
		16.7228	18.2989
		27.5334	16.5135
		15.3821	15.4017
		14.1395	18.9202
		12.9361	16.2911
		17.2918	16.4612
		15.938	16.0165
		15.539	25.0482
		13.6882	18.0504
		20.6141	15.7941
		14.7608	19.7116
		17.985	13.1454
		12.7203	17.5403
		13.6948	15.9903
		20.9215	16.0819
		16.2977	18.312
		17.4945	17.1152
		16.0165	20.5421
		15.9118	17.089
		20.6926	20.117
		15.7679	16.507
		17.6776	15.0093
		17.5207	16.5658
		15.781	15.0682
		14.1722	20.1432
		15.7679	17.2852
		15.4213	24.7866
		14.9766	12.995
		15.7483	16.6966
		14.7477	17.9065
		18.9202	15.539
		18.4886	17.5861
		21.4774	16.5789
		17.2067	15.0812
		16.3304	20.1628
		22.0529	16.762
		16.8143	15.5063
		14.3226	18.8679
		17.0302	14.1199
		15.3494	14.7608
		13.9694	18.1943
		15.3625	24.4531
		24.4661	16.5266
		14.7085	14.2572
		17.0694	17.501
		17.161	19.4565
		22.0921	16.8863
		16.5397	21.5231
		15.1663	17.8673
		12.8446	18.0177
		15.4148	15.9118
		13.7798	16.5135
		16.7816	19.4565
		17.9719	13.7209
		15.8726	18.227
		21.9482	14.3422
		15.6764	18.3251
		16.0884	15.0485
		17.4422	18.6521
		17.3768	16.023
		16.6312	18.1027
		16.8405	22.4649
		17.0759	15.1401
		13.7602	16.7751
		14.3618	15.6241
		16.0622	15.1532
		14.8589	14.1526
		14.1722	16.6508
		15.2905	16.592
		19.4892	14.9047
		16.919	14.63
		14.0087	15.7876
		14.1329	15.2186
		15.7025	14.1983
		14.3618	19.9601
		14.3553	17.9196
		21.909	16.0753
		14.2834	23.7271
		15.0616	17.0105
		21.2485	19.2472
		15.284	13.6032
		18.0896	18.0766
		15.3886	17.815
		14.1002	15.6698
		13.492	24.5773
		21.3269	13.2566
		15.0878	16.6247
		14.7346	17.7888
		17.5337	15.1205
		15.5521	15.2382
		28.207	14.4403
		13.5574	21.3466
		16.0426	18.1027
		15.1924	16.1669
		15.5587	16.2192
		14.5646	19.1622
		14.8327	18.1877
		14.8262	20.7841
		18.0046	16.4546
		14.5123	17.6188
		15.7025	17.8477
		12.9361	19.9078
		15.7876	18.8875
		19.6135	13.7471
		19.6592	19.3453
		15.3625	15.3559
		15.6502	16.1276
		15.853	16.6508
		16.1342	21.3989
		21.5558	17.6188
		14.2441	18.2597
		15.2186	18.7698
		17.0302	15.9314
		17.5337	15.8268
		16.3631	18.2008
		16.5985	17.8738
		16.1407	15.8726
		16.5266	16.677
		14.2572	15.7287
		14.3815	24.3353
		13.3612	20.9411
		13.6555	22.3733
		13.7209	14.0741
		14.0937	18.8156
		14.1983	16.0557
		17.161	16.5593
		14.8393	18.554
		14.9897	16.6835
		15.3755	17.4095
		14.4992	21.0065
		16.2061	15.5783
		21.3923	17.8346
		24.6362	17.7299
		14.63	25.5845
		15.8137	25.7676
		16.0688	16.2846
		16.1276	30.4437
		14.0218	23.4524
		20.7122	16.0361
		14.5384	21.5689
		15.9445	18.3774
		20.8822	16.7947
		22.2883	14.5973
		13.564	18.8941
		16.0034	18.142
		14.9177	19.2865
		13.492	14.388
		17.3833	19.2668
		15.8399	19.7966
		16.4808	16.9451
		21.1504	17.3964
		14.5711	15.2971
		23.6421	18.482
		16.3173	18.6194
		17.4683	25.9638
		17.6384	15.1924
		17.0105	16.0819
		15.2971	19.1491
		15.454	18.5017
		17.9327	17.7169
		15.1728	18.4101
		16.1276	17.6318
		18.0569	16.834
		16.5462	16.4219
		15.3494	18.9725
		13.2108	32.8504
		19.8097	18.07
		15.9641	16.2127
		19.8881	14.7085
		19.9339	18.3316
		15.8333	18.5344
		19.2145	19.6265
		13.4266	17.1413
		16.9255	19.6854
		13.3874	15.7745
		13.237	19.9078
		14.5123	19.3126
		16.3696	21.098
		15.6895	25.1725
		17.4029	26.245
		27.5596	18.4036
		18.8352	20.516
		16.8013	21.6212
		18.0896	18.482
		15.199	19.0576
		12.0205	14.8523
		28.0631	20.686
		22.7069	17.3702
		23.5636	17.0236
		17.161	16.2911
		16.5397	14.2768
		16.4873	14.9701
		13.6882	18.0896
		16.919	15.611
		16.6508	14.9308
		12.3017	19.0706
		16.7228	14.5384
		12.5437	15.3755
		17.743	18.3447
		17.5468	19.378
		13.9825	20.9149
		17.2067	13.5051
		15.5456	16.5462
		14.1264	15.8137
		16.5593	23.5113
		14.9177	19.2014
		21.5885	18.2531
		20.0582	15.3363
		16.7359	20.104
		13.4005	27.1475
		14.2703	17.3702
		15.0224	15.8726
		15.9641	21.3139
		12.7138	20.104
		20.0516	15.2186
		15.6175	21.3466
		14.4992	17.8738
		23.871	14.0872
		12.5633	15.8006
		18.142	20.0974
		16.7816	14.2768
		17.4683	21.2223
		18.6782	17.6384
		12.6353	16.0688
		17.3375	14.5319
		15.2971	37.278
		20.0255	21.0915
		25.3687	18.2531
		21.8044	15.6044
		21.9221	13.5574
		13.7667	13.3154
		16.108	17.4553
		17.8869	23.387
		21.5428	14.1133
		12.6549	15.2055
		15.9968	20.4637
		15.8072	16.1865
		16.5854	20.0255
		14.4403	17.6711
		17.4356	15.0485
		18.8614	16.9648
		13.6882	22.151
		14.7281	23.1843
		17.3964	14.5711
		13.4724	21.5755
		14.1526	18.4886
		12.9884	20.0843
		11.8309	17.0498
		17.1871	14.8196
		12.1121	14.5515
		20.3132	18.3905
		18.7698	16.7489
		14.1656	16.847
		15.5652	18.5474
		11.4058	20.0124
		19.5611	15.0028
		17.3899	25.6499
		21.2092	16.0753
		18.2074	19.9732
		11.8963	24.5381
		21.5624	15.8464
		12.6222	22.5499
		17.5534	18.6979
		22.7919	23.9429
		17.0825	17.6384
		12.5503	21.3989
		16.9778	18.1485
		16.3304	17.2329
		19.5808	16.1996
		15.2578	15.127
		19.9012	21.4447
		15.6306	20.5618
		16.8601	20.0189
		14.6169	24.4073
		16.6378	20.9345
		16.9975	15.3298
		17.0694	23.7925
		11.929	18.5278
		14.1853	14.4665
		14.0283	19.4957
		17.6972	17.8084
		16.3696	17.004
		15.0093	15.4867
		14.9766	17.1806
		14.8262	20.7776
		21.5624	22.0529
		11.4254	15.4279
		14.8393	17.2002
		15.1009	20.6926
		17.9588	22.4584
		11.8243	17.1479
		15.2774	18.4036
		19.1622	19.0445
		13.7863	16.9975
		17.2133	20.6141
		16.4023	20.6075
		24.3288	21.8305
		17.5599	17.6711
		14.6823	20.3983
		18.0635	18.1289
		17.0367	26.7028
		19.8162	14.146
		21.5951	19.3322
		18.1812	19.3061
		22.3014	13.4332
		15.2774	16.5266
		14.6431	28.5536
		13.8386	17.6842
		16.919	22.9358
		15.9968	16.507
		14.9374	18.4624
		17.0694	17.9065
		15.9707	19.62
		13.4855	21.9352
		18.2204	19.7246
		19.2276	13.2173
		14.8654	15.3036
		14.2964	23.217
		15.696	14.8523
		16.6443	18.7633
		20.2675	19.7508
		13.8779	16.5593
		19.9666	16.9648
		15.526	20.7318
		13.6948	16.3565
		19.8489	14.5253
		16.8797	26.0227
		18.5605	17.0367
		13.4789	15.9249
		15.3363	16.023
		17.9261	23.0273
		15.8006	21.9875
		18.2074	16.9844
		25.6891	15.2971
		20.0974	18.2793
		23.4524	13.2304
		17.2394	20.2609
		17.9065	27.0233
		19.7443	14.5057
		13.4397	17.7823
		14.9439	17.0956
		19.4565	16.8601
		16.8994	13.1912
		13.1454	16.0949
		18.9856	17.161
		16.8078	21.9809
		15.7287	17.9654
		13.8975	16.4743
		15.3428	19.6069
		16.4677	18.9398
		22.72	14.4861
		23.4851	15.2251
		16.919	15.6698
		20.1105	18.5671
		15.9053	18.0569
		29.757	15.5717
		15.1205	19.2734
		14.1853	14.4011
		16.8601	34.3154
		19.6004	15.0878
		15.9772	19.8358
		16.18	18.3709
		14.1329	18.5801
		23.6159	15.7483
		16.3827	18.1943
		15.7614	19.208
		16.0884	14.4861
		17.7626	16.7228
		17.7888	22.6938
		25.9703	22.3537
		27.5726	21.6278
		14.558	21.013
		31.4247	26.7944
		18.3447	18.8025
		13.165	13.1192
		16.4612	13.6032
		13.1389	19.535
		21.4577	16.5462
		15.9118	15.3232
		15.5521	17.488
		18.2204	17.9196
		22.3014	28.2201
		20.6206	22.1052
		18.1943	20.758
		14.231	19.9143
		21.2877	19.1949
		14.2899	21.752
		20.3329	39.5866
		17.8869	17.1479
		12.91	21.4643
		15.4671	18.3316
		11.5758	16.1734
		13.8713	17.4356
		20.1432	19.1884
		18.8221	25.2771
		17.1086	18.1681
		14.545	16.8863
		17.0825	17.0236
		15.9838	19.8031
		18.1681	17.5534
		14.545	17.4291
		15.7941	25.9442
		14.3357	22.7265
		15.781	16.2257
		19.5284	20.5094
		22.7657	17.9915
		22.5761	23.6617
		11.6674	18.8417
		27.5923	18.1616
		25.022	18.2531
		16.1603	21.3073
		13.6817	25.4406
		31.7452	16.9648
		14.303	20.6991
		15.8268	25.3556
		16.9517	20.2478
		14.0741	16.0688
		17.1021	19.6854
		16.7555	22.5499
		13.7013	23.1189
		12.3802	29.8747
		16.0557	19.5219
		13.3939	20.6926
		13.1912	17.4683
		18.8352	24.1195
		16.0622	20.0189
		12.91	18.8875
		19.8227	18.142
		17.1871	22.4191
		13.9891	21.1046
		16.592	16.2192
		13.165	23.6879
		15.5979	22.4126
		13.1258	20.4833
		14.8916	17.6253
		14.5253	26.487
		16.4089	18.4428
		30.0251	19.3322
		16.4416	20.7645
		14.6038	20.0582
		15.3363	19.79
		18.0046	21.497
		19.7639	18.4166
		14.7935	18.07
		14.7673	18.809
		24.5708	20.1694
		19.9928	30.8165
		15.8333	14.218
		12.8642	20.7841
		19.6985	18.9529
		16.3696	23.8514
		13.407	19.9732
		16.2257	22.4714
		14.3161	18.6521
		14.4076	13.564
		21.0588	16.2127
		19.9208	20.4244
		16.3892	15.1663
		14.0152	29.0245
		19.5415	17.2721
		15.0943	28.9199
		15.2578	22.6022
		14.4665	55.1257
		19.0118	20.6795
		16.7489	13.0996
		21.6147	75.6351
		26.4085	22.5826
		17.573	20.9411
		12.1971	22.9358
		12.7399	23.3347
		16.8078	27.0364
		13.3416	17.7888
		14.7608	34.9825
		18.2139	36.2643
		17.5926	20.3786
		15.4867	26.5916
		14.3095	24.1522
		14.7215	32.1637
		30.7707	31.5097
		12.995	19.9078
		18.4101	22.0463
		15.5456	21.9417
		15.9641	24.8062
		15.0747	23.544
		14.0414	20.6795
		13.1846	17.3899
		15.1597	15.9445
		16.9517	15.5783
		19.1491	16.3958
		15.3952	20.5291
		15.696	19.3584
		14.1787	20.6402
		15.0355	18.2204
		13.3154	17.7888
		22.3864	17.743
		15.4736	23.4982
		16.2519	15.4082
		14.2637	21.0588
		16.4939	22.733
		19.8489	19.5088
		12.4129	20.2544
		27.7492	24.5315
		13.649	19.208
		14.6692	19.9601
		18.2466	16.0557
		14.7215	13.8844
		20.1105	16.3238
		12.5633	20.9999
		16.2977	15.3494
		13.4986	16.3369
		17.8934	21.8763
		14.4796	19.1557
		27.0429	19.79
		17.7692	21.9744
		12.8838	17.8477
		16.1276	15.1924
		20.7645	16.8209
		14.7804	15.7483
		14.2768	15.4409
		18.7633	13.1716
		13.0604	16.6051
		22.7854	23.2562
		20.6402	24.5185
		18.4951	14.6823
		15.9707	14.218
		21.3531	15.5129
		17.9719	15.369
		14.2572	22.2164
		16.0492	19.2341
		18.312	14.4403
		16.9255	23.0535
		14.7281	14.8131
		13.2435	21.3466
		17.8738	18.6586
		13.1062	15.4082
		14.0545	19.1622
		14.6234	34.832
		16.4089	19.4892
		13.5247	17.2329
		13.2827	20.6206
		15.866	15.7352
		13.4005	19.378
		17.4226	15.4998
		14.9112	16.3958
		17.8346	14.1918
		22.7069	16.2519
		12.9688	14.0414
		16.6639	18.3055
		28.0762	16.4481
		15.0224	18.6259
		19.5023	16.5527
		16.762	19.5415
		14.9112	15.1074
		12.4195	13.7798
		15.3363	19.6527
		16.847	19.0837
		16.3762	16.3173
		14.3488	15.2971
		14.7673	17.8411
		22.3995	17.9915
		13.8583	16.8013
		12.9296	14.9504
		14.5188	14.715
		28.7695	15.9576
		25.3163	17.1544
		21.0261	15.369
		14.7412	15.1728
		16.5789	14.5384
		16.5527	22.1902
		18.3839	18.6913
		12.9427	19.3715
		15.0551	13.3285
		16.18	16.7882
		19.6658	16.5854
		16.2192	16.3696
		23.544	15.9445
		21.425	16.2911
		20.5094	16.5135
		16.4677	15.2055
		14.63	20.928
		11.5562	18.3578
		18.6325	18.1485
		15.2513	14.5057
		19.1033	15.6633
		24.2242	18.8941
		19.5284	18.9529
		15.5325	21.2223
		29.4692	18.4363
		17.9327	14.6561
		24.8389	17.1152
		14.6431	13.2173
		15.6044	15.199
		19.8554	17.5337
		12.7334	16.0034
		14.9897	18.1747
		12.256	19.8162
		17.3114	15.539
		18.6259	14.0152
		16.6835	17.8542
		14.4534	22.5957
		22.5565	14.9962
		28.3051	16.4677
		13.1781	17.8084
		19.2145	18.881
		19.8227	19.0706
		16.1996	15.3494
		12.6287	15.0355
		21.8763	20.0974
		13.7536	16.7359
		14.0414	13.492
		19.4892	13.976
		14.0283	16.6312
		17.8346	15.9445
		12.2952	15.5652
		18.6259	17.9654
		16.919	14.3357
		25.2509	21.8174
		18.5213	15.6895
		16.6181	15.1139
		18.3512	17.9654
		27.8866	18.5278
		15.3755	21.2288
		17.3114	20.1694
		24.3877	20.8168
		14.8916	20.6402
		13.1519	13.8517
		25.2902	13.4005
		12.2821	18.6913
		11.6804	12.0598
		18.3055	17.1086
		17.5076	16.9844
		28.4425	16.7686
		21.4316	13.7013
		15.1009	17.815
		27.5269	14.5711
		32.046	16.108
		19.0052	18.2728
		20.2609	13.7013
		22.4911	18.3055
		25.7022	12.668
		38.501	21.6212
		16.9844	13.9237
		15.2055	18.3512
		24.7408	15.4082
		17.004	14.6431
		13.1519	17.246
		21.4054	18.6259
		20.2086	17.0432
		17.3441	17.0236
		37.69	16.7947
		22.2425	19.0118
		21.2419	15.1924
		24.8782	21.1765
		38.1151	15.3625
		17.743	14.5188
		17.7823	17.3179
		20.9149	19.9274
		24.0737	16.2257
		25.4798	12.1971
		17.7496	14.7804
		20.1236	14.4665
		19.6592	24.5904
		20.9345	15.7025
		23.6944	17.5337
		20.8103	18.2989
		22.4976	14.8785
		17.1806	13.9433
		21.9679	19.5219
		23.2759	14.4142
		19.8554	25.8199
		19.9666	12.8576
		16.1669	24.368
		35.5057	19.9666
		18.4951	13.3154
		25.1921	17.815
		19.7443	20.5487
		22.6807	18.0635
		18.9856	18.8483
		18.8352	16.7489
		21.8698	14.6234
		18.5671	17.161
		15.611	19.0641
		23.7206	15.2644
		16.6116	15.938
		40.136	16.2388
		15.853	18.7894
		22.5957	18.4886
		21.5689	17.5599
		18.469	19.463
		16.3762	17.331
		19.5938	19.3584
		39.8482	13.2108
		29.6851	16.2388
		19.1884	17.2656
		21.4904	15.2513
		17.658	18.5082
		25.6433	24.1522
		25.6368	24.2699
		18.5082	19.5415
		15.1859	18.9464
		21.7847	24.2372
		23.387	17.4095
		19.1884	15.4998
		21.0392	18.2531
		20.2151	18.0635
		19.4173	13.564
		23.8841	18.2728
		23.0273	15.4606
		23.5767	17.416
		22.6611	18.0504
		28.4817	14.7804
		19.3257	17.0694
		29.1095	14.4338
		19.777	20.7841
		23.6356	18.0635
		24.6035	15.5652
		25.833	20.032
		25.5976	16.507
		23.0208	16.3892
		19.0968	16.7424
		27.4353	27.4549
		19.2668	23.5898
		14.3291	25.3817
		16.3696	17.6515
		17.2133	16.7489
		18.1812	21.6932
		18.3905	20.3394
		19.5873	17.573
		20.2151	19.7966
		17.6384	18.1681
		18.397	17.0825
		31.2416	17.2721
		20.7776	21.3727
		18.2531	15.8595
		18.227	19.5088
		21.17	20.6729
		31.5424	13.8975
		20.4506	18.9398
		16.2715	18.9071
		27.1606	16.5462
		18.6194	18.07
		24.8389	17.2198
		17.0956	14.6758
		37.9058	21.5755
		18.3578	23.217
		16.3631	20.4179
		14.6365	18.1747
		18.1943	24.6885
		17.4553	19.2668
		22.8311	20.3786
		14.1722	19.5808
		14.2572	18.7436
		14.9177	21.6932
		16.2584	19.8358
		17.7169	19.9862
		15.9838	19.7639
		23.7664	20.0974
		15.2971	17.161
		14.2114	17.4618
		27.965	17.4814
		15.9576	20.0974
		16.0884	19.4107
		19.6396	16.8274
		17.9196	21.0784
		15.4148	22.9096
		17.4683	17.1871
		15.539	15.5717
		17.3899	15.1532
		12.2429	24.5315
		15.3952	23.5244
		20.3263	18.8941
		23.0273	17.2329
		15.4017	19.4434
		15.2251	19.5742
		18.2204	16.3304
		12.7465	19.9928
		14.4534	18.5801
		16.7555	22.648
		18.7175	20.0778
		15.866	21.497
		14.7346	15.6895
		19.2538	16.8928
		14.558	18.3055
		16.7359	16.9844
		15.2578	16.919
		19.7966	20.8626
		15.3559	16.2388
		23.0731	24.0737
		21.6997	15.5652
		17.2264	18.0439
		16.9059	19.2603
		12.6222	20.7383
		22.393	18.2204
		17.2264	13.5967
		15.5914	16.6901
		12.426	19.3649
		14.2834	22.8835
		19.2472	18.6717
		15.9838	16.0688
		12.0336	21.6016
		14.4861	17.0498
		16.9713	19.4173
		19.9862	14.4796
		13.734	19.0968
		16.9451	20.7383
		15.5979	21.0588
		18.2401	20.6141
		16.9517	26.16
		15.7745	17.2133
		14.4272	22.4976
		17.0759	17.9915
		18.9791	16.8863
		20.8037	18.7502
		18.4101	13.5967
		11.8963	18.6325
		14.388	17.9785
		17.2918	18.8875
		16.6116	13.9694
		14.7085	16.0295
		18.7698	19.8816
		16.1603	17.8084
		13.3678	19.9993
		19.6396	16.435
		18.5736	17.1283
		14.8589	14.9374
		14.2637	16.8667
		17.7692	19.1033
		12.0794	16.8863
		14.9635	20.6991
		13.5116	18.8221
		13.0604	20.8495
		18.4363	19.2603
		14.0021	19.7704
		20.5029	20.5618
		15.1793	18.6194
		16.0753	20.1955
		20.3525	15.6764
		18.2662	15.8333
		13.4659	18.9398
		15.3101	26.9644
		14.3488	16.3108
		17.3702	18.5867
		24.1653	17.7823
		18.1354	17.1152
		16.9713	16.108
		14.8196	15.4671
		14.3488	20.9869
		16.6247	19.2603
		18.7894	17.7626
		18.0896	15.3232
		13.9629	17.6907
		12.7203	16.8274
		17.9458	16.8994
		16.9517	16.265
		14.9112	17.2852
		13.904	17.1086
		15.9053	16.1015
		17.815	17.5991
		14.218	17.5534
		21.1373	17.4814
		16.265	17.6842
		17.6907	17.6711
		19.62	15.3167
		17.161	16.834
		18.6652	19.4238
		13.8648	16.6901
		19.293	13.8975
		14.7215	20.7383
		16.3827	17.2852
		13.4201	18.2008
		13.4528	18.3774
		14.63	19.051
		15.526	19.208
		13.9825	22.1183
		13.8583	22.1117
		19.051	20.5225
		16.9909	18.3316
		13.2239	17.6515
		14.4076	17.7299
		14.1918	18.6586
		17.5861	22.3733
		12.2102	18.2793
		14.8981	19.0445
		14.4338	17.9327
		14.3945	16.8274
		17.9654	22.1379
		14.8916	17.7299
		16.6116	17.0302
		15.2774	17.2721
		18.9922	22.0725
		16.592	19.123
		19.2276	17.9
		14.1591	19.4957
		15.6306	20.3656
		16.507	18.0046
		17.2852	19.9601
		16.6051	20.2151
		14.5907	21.5362
		14.6365	23.3151
		16.7162	18.7502
		15.6764	20.0909
		35.1852	18.5409
		14.9177	15.5914
		13.7798	26.0881
		15.9576	17.9981
		16.5593	17.5795
		12.1121	22.0071
		17.8084	20.2805
		21.1634	20.2936
		13.9106	20.1955
		17.7299	21.7259
		17.3179	22.321
		14.8785	19.4892
		16.2388	18.8483
		13.2631	25.421
		16.1407	16.8143
		17.2525	21.1177
		13.8059	24.0214
		12.7268	21.1111
		19.1687	18.9595
		15.1597	18.4755
		13.7275	17.3375
		12.9034	19.1033
		14.9701	23.3478
		11.9486	20.2086
		14.5319	16.9124
		14.7739	22.648
		21.1634	18.5344
		13.0015	17.7365
		14.4469	14.218
		16.1015	19.4238
		17.7365	18.0504
		14.7804	17.3702
		15.7156	16.0884
		12.5437	18.6586
		12.838	22.733
		19.1557	23.8448
		16.4285	17.7299
		14.3684	18.0242
		18.796	17.161
		13.0865	19.8685
		12.0859	18.0439
		18.6652	23.2432
		13.4266	20.6533
		15.4736	22.0267
		16.1996	17.0825
		13.2958	20.9411
		15.1859	20.1824
		32.0133	20.686
		17.1021	18.8744
		12.3606	20.4833
		14.3945	16.5724
		14.231	22.9816
		12.9296	24.3419
		16.4808	21.8436
		16.5266	19.62
		13.0604	21.7782
		22.9292	21.2485
		14.6627	19.1818
		18.142	26.1469
		12.6484	19.4892
		13.1389	18.554
		16.7816	17.416
		16.8667	17.4422
		16.8928	20.5487
		15.0485	16.8274
		15.4475	18.1485
		17.0629	17.7169
		13.4986	21.6932
		16.2127	17.5141
		13.7994	16.6116
		18.4363	19.2799
		14.8458	25.663
		13.3612	26.487
		13.6882	25.5583
		18.3643	22.6611
		14.8066	24.8258
		13.1127	19.6135
		16.1015	21.8632
		18.9137	19.2538
		22.6676	20.431
		13.3808	16.6705
		14.5123	20.0843
		15.9053	22.1248
		16.847	20.9999
		13.5378	15.8987
		14.5646	22.2622
		13.0865	17.3048
		11.8112	16.4481
		16.6378	18.6717
		19.9274	22.8704
		17.161	17.8607
		19.3519	19.2145
		16.35	19.79
		16.1538	20.5029
		17.089	21.9679
		13.2108	17.743
		13.1846	23.1516
		16.5331	19.9993
		15.3036	21.7128
		15.5521	18.5409
		14.4142	23.8579
		17.0367	20.8168
		19.4107	20.3132
		14.9766	22.4453
		14.2964	20.6991
		18.0962	17.9523
		16.7359	23.701
		16.1538	18.6128
		24.6166	26.1862
		17.6253	18.9268
		13.6686	15.9903
		12.0925	17.4618
		15.6437	21.4512
		14.0021	18.2139
		16.7293	19.5742
		17.6972	23.1058
		21.1961	23.9626
		16.265	18.0962
		15.8464	17.1217
		16.1734	20.9607
		16.7489	19.1818
		19.5088	18.6063
		13.9891	23.786
		16.5004	14.9831
		20.444	17.246
		12.2952	18.8352
		16.2977	23.0273
		14.1722	17.7757
		15.866	19.4369
		15.4671	16.2846
		16.3304	19.3976
		13.4528	22.2883
		13.1062	17.5534
		16.4743	16.592
		14.1787	16.677
		19.8816	23.7467
		15.1597	18.966
		15.5456	17.9719
		23.9822	17.1937
		13.7536	21.2615
		16.1865	20.4898
		24.5839	17.6253
		21.2746	18.2924
		20.4898	17.0171
		21.255	22.5826
		15.5652	18.6455
		16.108	17.2067
		15.9903	15.5325
		15.2644	21.0588
		20.3656	21.8763
		14.7412	21.909
		17.8477	16.919
		16.3042	19.3453
		16.6901	16.4939
		15.4409	19.2145
		19.3846	17.4487
		19.9143	27.3764
		18.7109	27.8473
		19.0772	16.8209
		14.4076	18.3382
		15.1466	18.5801
		12.7399	17.4618
		17.3179	15.866
		17.9392	21.013
		15.5129	23.9953
		16.3369	15.4148
		23.3609	17.7823
		15.8464	20.6729
		13.3547	15.127
		17.4749	16.677
		19.3322	17.1283
		13.8517	15.781
		18.8287	19.6527
		16.507	17.7038
		17.4291	16.1996
		16.9059	15.2186
		17.6515	21.013
		19.4434	16.762
		17.9654	15.8987
		20.3329	16.7882
		18.8025	14.5384
		17.4226	19.9862
		19.1295	17.5664
		15.8268	24.4661
		17.5076	17.3114
		18.155	18.8875
		15.3886	30.5353
		17.331	19.5154
		15.3167	14.4338
		20.4179	14.6627
		15.6175	15.2905
		14.1133	19.6396
		14.9962	16.8928
		22.3603	18.6194
		13.9825	13.6555
		17.3441	14.63
		21.2419	16.5331
		15.5783	16.9909
		15.8595	16.1211
		17.5141	17.8019
		17.5599	15.9445
		17.0432	16.5135
		18.2597	15.454
		15.8399	30.6661
		16.9517	17.6842
		19.208	16.919
		20.9345	31.3004
		16.2192	15.0551
		15.5914	15.3886
		17.2983	16.1865
		16.5985	16.0949
		16.3827	18.4493
		16.4219	17.4553
		18.8221	18.1812
		14.6823	22.236
		17.004	13.3743
		17.7888	16.4808
		18.8483	17.9523
		14.2049	18.9006
		15.5521	19.9732
		18.5998	22.9554
		15.1924	14.2703
		17.3441	15.8857
		17.6057	14.8916
		16.8078	22.5368
		15.127	20.4767
		18.5474	17.0956
		19.6789	22.3406
		17.3441	16.8928
		13.2566	18.6194
		22.0333	15.2709
		15.3101	17.4749
		18.7436	17.1806
		18.3447	15.6241
		16.8536	21.8698
		20.5683	19.4696
		16.3238	14.4011
		17.9785	19.1033
		15.7876	18.3185
		17.7299	15.4279
		16.5527	21.6801
		17.0759	13.8975
		14.8916	21.739
		16.9713	21.2812
		16.4089	17.3375
		14.545	17.9327
		18.6913	16.507
		17.331	22.6153
		16.1146	16.6312
		18.4559	18.3512
		14.1526	17.985
		17.8346	21.1111
		14.8131	18.3905
		15.6829	16.9124
		19.2014	18.5998
		18.1485	22.9816
		19.8751	19.208
		15.2513	15.2251
		17.4029	19.3453
		15.1139	21.2419
		15.611	18.4886
		17.6776	18.9529
		17.7299	18.9268
		21.3531	14.1656
		17.5337	18.6325
		14.4796	18.1027
		14.0937	23.6617
		22.5107	16.4219
		20.7776	14.2899
		17.246	19.8358
		14.7215	20.9018
		20.2544	17.815
		16.023	17.416
		17.1413	15.696
		16.8209	17.7953
		16.6705	17.246
		17.488	18.5671
		17.2198	17.416
		15.9641	16.5854
		15.9445	17.6057
		15.2055	19.8358
		19.5219	18.4297
		16.0884	16.6378
		13.976	18.9398
		25.7414	15.0485
		16.6508	17.3441
		17.6122	19.4173
		15.9184	17.9261
		15.3167	18.4559
		15.1401	17.8019
		18.3709	17.7823
[truncated: 6,149 more rows]

## Sheet: Fig.1 - Supplement 2B
Experiment: Distance to Nearest Neighbor
Figure 1 - Supplement 2B
Collected from 4 Independent Experiments
	Strain Treatment	No Strain	High Strain	No Strain	High Strain	No Strain	High Strain	No Strain	High Strain	No Strain	High Strain	No Strain	High Strain	No Strain	High Strain
	Timepoint	2 Hours	2 Hours	4 Hours	4 Hours	6 Hours	6 Hours	8 Hours	8 Hours	12 Hours	12 Hours	16 Hours	16 Hours	24 Hours	24 Hours
	Average DistToNN	17.8207	19.6298	17.0541	18.3319	19.4875	17.3008	19.0303	19.4968	17.5588	16.4191	18.6782	17.2821	17.7564	16.4513
	SEM	0.0518215	0.0699073	0.0451858	0.0550205	0.0661877	0.0682336	0.065891	0.0691131	0.0512369	0.0512854	0.065089	0.052959	0.0579456	0.0500743
	# of Cells Detected and Analyzed by MATLAB Script (N)	4422	3553	5215	4583	4030	3670	3640	3524	3746	4061	3825	4377	4240	4715
	Raw Data output extends downward from here…	22.02	28.42	25.51	23.87	31.2	26.13	20.78	24.79	22.9	24.24	25.9	28.76	20.32	19.72
		19.73	21.65	16.98	26.18	29.76	22.96	19.22	23.72	19.91	15.78	17.48	18.76	21.21	17.8
		22.92	26.18	17.88	22.15	26.49	17.69	20.01	21.75	20.52	13.37	19.68	19.06	19.75	20.73
		25.08	27.53	20.76	21.37	24.76	38.23	17.45	28.1	22.2	15.48	21.16	17.98	18.82	19.58
		25.98	29.38	23.44	20.39	25.26	18.35	24.57	26.32	24.04	21.34	20.97	19.72	17.95	19.14
		17.8	24.24	23.76	18.9	24.95	26.96	22.42	26.34	29.92	17.18	21.4	19.84	19.07	21.89
		19.49	17.98	22.8	22.68	24.57	17.09	17.77	24.55	22.2	15.46	18.54	16.61	18.28	24.06
		18.84	21.66	25.27	24.95	24.98	20.85	20.84	19.83	23.33	16.9	16.57	24	18.9	18.06
		20.96	22.96	17.54	19.35	31.08	18.65	17.65	17.94	18.21	15.16	20.72	20.59	16.24	32.43
		19.83	22.03	15.59	19.22	21.8	18.6	16.43	22.21	18.33	13.8	31.22	27.18	15.27	18.72
		18.28	17.66	25.1	17.67	25.19	26	17.97	21.12	18.85	12.42	15.41	16.5	16.58	14.85
		18.64	20.92	17.65	19.59	24.64	16.72	15.74	19.01	20.94	16	24.22	14.29	13.98	20.5
		19.03	18.93	20.03	16.51	21.47	21.76	17.26	18.88	19.22	14.48	18.08	16.26	17.81	16.67
		16.72	20.13	14.49	16.09	23.62	18.52	15.93	23.82	17.87	19.15	16.45	23.01	13.53	16
		16.75	24.56	18.47	24.47	22.18	16.32	18.46	22.58	19.75	20.66	16.72	15.75	19.83	16.55
		17	19	14.31	19.26	23.89	19	15.08	18.32	16.35	13.91	18.17	17.81	18.5	19.2
		17.38	25.85	16.8	15.06	23.33	18.8	15.74	23.83	18.11	14.8	21.2	16.01	15.69	16.7
		19.62	20.84	18.32	18.8	18.43	26.55	27.69	18.79	18.79	18.16	17.1	21.98	15.82	17.22
		18.74	21.67	17.04	19.86	24.41	21.06	14.93	15.58	20.26	16.61	15.46	17.08	15.19	16.32
		19.01	20.91	16.41	19.87	26.27	18.11	18.24	23.82	17.28	16.31	19.46	19.7	15.18	20.08
		16.85	21.16	16.25	19.43	19.75	17.98	13.4	17.22	20.18	21.78	20.52	18.11	18.85	17.93
		21.01	21.72	16.61	16.08	20.76	19.89	21.05	23.33	16.54	14.68	17.17	18.43	18.71	16.27
		17.45	20.37	18.53	18.23	20.11	23.04	19.3	17.97	16.61	19.24	17.46	21.73	16.27	26.82
		18.16	19.03	15.61	15.08	29.81	17.47	18.69	16.33	15.73	23.27	17.02	18.57	14.77	17.63
		20.16	22.14	18.28	19.74	25.15	16.8	17.01	19.37	18.33	16.46	16.23	17.6	15.5	18.42
		18.09	19.56	18.61	20.36	22.56	16.19	18.38	20.91	20.33	15.26	19.25	16.38	16.45	20.17
		18.78	23.36	16.7	18.89	21.18	18.77	16.73	20.18	17.17	16.46	20.46	14.71	14.38	17.36
		19.39	18.86	15.92	16.61	21.14	17.28	13.54	18.85	18.93	17.36	17.45	20.68	16.91	16.71
		17.91	22.92	15.15	17.47	25.22	18.09	14.69	27.38	14.16	15.2	21.86	17.69	18.5	17.42
		19.28	20.82	19.32	22.48	24.25	21.49	16.84	16.41	17.46	15.98	19.14	17	17.16	24.08
		20.93	18.02	20.23	18.41	24.71	14.12	21.6	25.33	19.28	19.34	22.44	15.57	17.95	21.65
		20.66	20.64	15.81	20.27	21.94	14.24	14.16	21.19	20.02	18.08	19.9	19.02	20.06	24.78
		26.17	19.57	16.28	18.65	21.45	16.41	18.33	21.16	17.3	17.36	16.94	17.33	13.84	20.69
		20.09	18.86	16.38	20.11	21.34	17.21	20.42	21.68	17.22	15.8	19.16	19.19	16.5	17.51
		18.09	17.23	14.43	15.78	20.59	17.41	19.66	18.36	16.02	20.92	20.62	17.23	17.68	16.42
		21.12	22.8	18.11	15.69	27.94	15.15	18.53	20.2	14.68	17.42	17.29	19.4	15.24	17.41
		24.42	19.07	16.29	22.34	22.73	16.93	12.31	24.01	13.91	14.67	21.04	15.82	16.41	14.99
		25.51	19.65	15.26	19.02	21.26	22.88	18.3	22.65	18.07	18.2	22.91	15.47	19.77	19.29
		21.25	17.51	15.74	20.8	22.62	17.83	16.26	28.86	17.82	17.65	18.69	19.68	18.67	22.5
		15.71	21.17	15.91	25.87	24.22	19.6	13.21	22.26	19.12	14.14	22.27	18.57	14.85	15.43
		18.09	23.92	21.84	18.51	21.66	18.47	16.12	20.86	20.97	16.94	19.97	16.11	18.24	18.28
		23.22	17.13	14	20.66	21.99	18.9	19.72	27.52	15.16	16.35	18.79	15.45	16.73	26.78
		20.69	17.17	16.54	19.26	20.68	14.67	13.98	22.04	14.74	19.65	17.52	14.89	20.96	19.1
		17.24	16.16	14.87	22.98	26.93	14.89	17.86	23.96	16.04	17.61	19.15	16.37	19.32	23.36
		17.07	17.56	15.81	15.32	22.73	15.3	13.1	22.59	15.05	16.58	22.89	18.07	18.37	20.05
		24.34	22.07	14.31	16.74	20.12	18.77	18.29	32.29	13.62	14.3	18.01	16.55	20.36	16.44
		19.24	17.23	14.99	19.48	20.15	18.75	15.99	23.96	14.89	15.07	23.45	13.18	22.67	16.97
		18.67	18.44	14.26	21.89	19.54	16.07	17.18	22.33	15.34	14.06	19.04	15.11	20.56	17.34
		19.79	17.6	16.12	20.94	27.44	19.24	17.99	30.99	15.35	14.57	15.71	14.18	21.03	23.57
		24.06	18.03	17.46	16.7	18.47	16.35	14.44	27.21	13.54	18.51	16.5	27.44	17.05	19.72
		20.55	26.49	20.29	21.61	22.54	14.05	19.19	23.77	17.74	16.02	17.59	16.72	19.88	17.94
		21.47	19.01	26.3	18.51	19.7	16.71	13.41	26.73	18.89	14.28	18.15	14.02	17	19.5
		18.44	17.43	17.58	17.15	21.54	20.59	13.74	23.68	17.31	14.51	17.12	20.14	18.86	18.47
		21.17	18.2	15.83	18.76	22.56	18.78	13.48	22.95	14.19	14.94	17.81	14.51	15.87	21.12
		16.2	17.66	18.04	16.65	24.31	16.02	13.48	19.39	20.05	14.76	16.52	16.16	16.71	19.95
		18.29	21.1	17.64	17.27	19.09	15.24	14.16	22.94	15.61	20.36	16.77	16.57	21.99	18.25
		16.89	16.99	18.93	17.33	21.63	17.2	16.6	23.01	19.61	13.92	15.81	21.63	18.43	19.18
		20.04	19.19	18.78	18.98	22.32	18.3	14.02	26.57	24.39	13.73	20.02	14.65	18.42	19.15
		18.14	22.09	17.51	21.5	19.66	16.19	17.27	25.35	15.5	21.47	18.21	12.57	20.27	22.65
		20.65	17.91	17.99	21.67	20.19	13.65	17.21	18.42	17.47	13.66	17.23	14.56	22.02	19.31
		17.73	27.63	16.82	23.87	21.26	22.85	16.12	22.8	15.5	19.61	22.33	14.04	16.91	23.49
		19.5	20.37	21.38	23.25	19.25	20.28	17.04	19.49	15.52	15.26	17.33	17.97	14.08	18.31
		18.52	18.31	18.02	18.85	25.98	17.31	14.71	21.09	16.84	18.43	16.84	13.88	16.34	19.15
		18.92	23.05	18.55	19.3	22.4	14.79	14.02	23.35	17.82	16.3	15.31	16.87	19.11	16.06
		18.35	19.77	15.4	18.92	18.96	16.11	17.33	28	16.52	18.18	19.25	15.73	19.94	17.11
		22.54	18.92	17.02	22.81	21.38	13.6	17.19	23.08	17.82	15.5	18.24	17.24	16	23.06
		18.85	17.63	15.91	21.78	18.06	14.75	16.99	24.7	18.01	16.56	17.36	16.7	21.77	21.29
		20.68	21.94	21.24	20.84	24.23	16.8	18.18	24.43	21.13	18.08	15.9	23.72	14.33	15.92
		20.56	17.76	14.08	22.64	22.13	16.11	16.71	22.52	19.8	20.6	19.06	16.56	23.76	18.08
		18.5	21.52	17.02	20.64	17.07	19.65	18.99	28.35	17.98	16.89	17.8	17.63	20.86	18.27
		19.08	16.93	18.11	19.93	21.81	25.43	22.07	22.35	20.62	18.75	23.4	18.53	18.41	18.3
		17.67	16.2	17.11	21.11	16.99	15.85	15.19	27.62	16.71	14.29	16.28	16.62	21.45	21.5
		17.02	22.16	13.96	21.24	17.76	15.97	17.02	24.05	17.02	16.77	17.42	16.08	21.05	17.21
		20.35	19.04	18.94	19.55	21.18	15.31	17.01	24.49	18.51	17.27	20.14	15.76	14.8	14.95
		20.64	16.38	14.9	21.07	17.88	17.54	15.49	22.07	16.75	16.97	18.26	15.56	20.06	19.33
		20.01	20.65	14.26	20.2	19.43	15.65	22.27	24.79	21.91	13.61	20.91	16.64	21.25	17.24
		17.54	20.96	13.85	21.13	21.08	15.52	17.71	24.98	17.2	17.15	17.77	16.34	20.59	17.24
		21.1	19.64	14.87	19.11	17.96	17.27	17.22	27.26	15.82	15.39	19.42	15.87	16.26	18.81
		20.55	14.24	17.09	20.61	25.98	15.64	17.06	22.13	15.18	15.83	20.82	17.88	20.67	16.52
		18.46	26.2	18.16	26.18	28.46	14.61	16.69	22.39	14.93	14.34	15.55	17.55	19.07	18.85
		23.47	17.36	18.74	19.53	20.95	16.01	17.57	23.14	18.52	16.21	17.1	16.68	24.31	18.18
		21.44	19.38	15.79	19.3	20.59	14.35	19.67	25.25	17.62	17.69	27.13	15.71	23.21	14.81
		20.6	17.74	15.13	19.19	19.62	12.83	18.66	21.56	15.57	18.5	19.78	18.37	18.48	15.17
		17.78	21.85	14.05	20.79	19.23	17.02	15.24	20.74	15.77	17.9	16.59	17.01	24.47	16.39
		24.07	17.11	14.98	20.28	21.95	14.18	20.49	23.99	17.74	13.87	19.02	14.07	21.06	17.41
		22.94	14.42	15.25	19.18	18.63	13.53	17.5	18.24	17.29	14.34	29.14	14.7	20.33	15.7
		18.71	20.45	17.65	18.8	24.14	18.1	18.24	22.28	13.85	14.85	23.77	17.01	20.36	21.15
		20.62	20.36	15.13	16.15	26.3	18.99	18.12	24.83	16.58	16.98	20.34	15.93	20.95	15.08
		18.85	15.35	18.14	19.47	16.58	17.95	17.81	23.59	16.74	19.08	22.66	17.15	21.63	17.26
		20.86	15.43	12.83	15.32	21.2	19.21	23.07	24.52	21.63	20.06	17.46	19.68	20.13	17.02
		23.15	16.29	17.89	21.36	22.76	19.74	15.52	20.31	14.15	15.92	16.58	14.79	24.17	14.95
		21.52	17.16	14.65	15.22	21.1	19.01	17.54	24.3	15.71	16.42	16.1	15.53	28.29	17.57
		17.35	23.96	16.75	19.02	20.72	17.65	16.94	26.11	16.78	18.18	16.39	18.23	24.32	16.83
		16.75	21.78	13.55	20.05	18.17	16.6	16.39	27.3	18.12	18.48	18.61	17.81	24.88	15.4
		23.78	15.44	15.75	16.95	23.64	17.3	13.77	27.89	15.43	14.15	16.73	17.11	20.51	15.57
		18.77	16.41	15.68	21.26	23.26	21.03	17.57	26.63	15.99	15.66	19.01	19.77	20.36	15.07
		17.53	21.22	13.11	20.23	17.84	16.45	16.44	23.12	16.17	20.81	16.8	18.94	18.58	17.27
		20.93	14.97	14.67	22.44	24.31	17.11	14.92	26.04	14.6	14.19	26.24	20.2	21.94	18.67
		21.39	14.89	12.97	15.52	25.12	16.79	18.61		13.8	17.24	19.93	15.52	21.08	16.01
		19.02	17.82	16.86	16.56	26.59	16.08	14.18	24.09	19.85	17.72	18.28	17.21	21.47	16.44
		22.36	17.64	15.24	20.38	34.62	17.9	16.32	22.97	17.06	15.28	15.96	16.74	19.69	14.41
		24.38	13.55	16.12	20.48	23.17	15.3	17.83	21.99	14.08	19.91	14.94	19.48	22.76	16.79
		21.33	15.31	15.79	17.02	25.65	16.77	14.91	21.07	16.84	13.95	17.3	15.43	21.68	16.8
		18.96	14.53	15.41	15.93	21.58	20.9	19.37	20.71	20.94	16.54	21.16	19.74	19.93	18.96
		18.39	22.48	22.95	17.33		15.54	12.79	22.08	15.8	17.09	18.59	18.08	20.47	20.78
		21.16	13.86	18.06	20.23	30.49	16.16	16	20.95	17.64	16.61	25.85	16.22	21.28	16.32
		20.99	19.07	15.25	19.46	21.02	17.22	13.99	18.48	18.36	16.79	30.52	16.64	25.65	21.66
		20.44	15.39	13.4	20.92	19.02	15.06	16.79	18.94	18.19	16.63	14.78	17.38	21.55	15.77
		18.84	13.31	15.34	18.84	21.44	28.33	15.45	19	19.61	20.45	15.53	17.5	20.86	15.08
		19.08	18.53	16.02	18.44	35.15	24.24	16.51	17.84	16.3	15.18	17.89	18.55	20.55	18.99
		18.44	16.07	17.58	20.5	23.89	15.51	15.94	21.82	19.3	14.85	17.33	18.6	24.14	21.05
		18.63	17.39	20.83	19.92	23.48	14.04	14.21	15.66	18.46	16.97	22.25	16.39	19.4	23.04
		18.54	18.17	12.53	20.37	24.59	19.52	18.47	18.64	19.16	18.67	16.77	18.59	22.38	18.24
		17.99	17.1	17.18	19.3	17.88	17.59	12.43	19.76	16.95	15.88	25.65	22.16	20.02	16.6
		25.43	17.19	12.02	20.73	21.14	14.97	17.21	20.66	18.14	16.02	19.89	18.92	19.45	20.53
		17.89	18.25	21.38	19.69	20.16	18.69	14.55	19.21	19.47	16.54	22.1	17.53	20.96	15.46
		14.97	20.11	17.74	21.18	18.29	15.39	16.03	22.25	18.33	17.85	18.78	23.27	19.12	15.44
		17.94	20.04	12.08	20.13	18.83	16.16	14	18.53	19.18	15.85	24.17	15.14	23.08	24.31
		22.65	21.81	14.81	19.66	18.97	15.13	11.54	19.21	19.16	15.67	17.77	18.71	16.38	22.64
		24.99	18.4	18.15	20.98	19.03	14.42	16.75	19.29	17.71	14.8	17.17	17.58	19.15	20.23
		15.82	19.07	18.98	19.88	18.79	14.35	14.78	21.3	17.68	20.2	26.57	20.35	19.81	21.58
		20.7	16.46	14.94	19.81	23.79	17.83	10.91	18.42	18.94	14.94	17.97	16.81	27.8	15.9
		17.67	22.47	13.87	19.47	23.42	20.16	12.51	20.74	18.23	14.52	35.18	17.79	24.26	16.37
		23.65	20.23	16.07	20.08	17.75	14.54	16.81	19.76	16.75	15.18	25.52	19.06	22.4	18.22
		22.98	16.31	15.91	20.43	19.34	19.1	15.27	20.96	20.88	16.18	17.63	19.59	18	17.88
		22.03	18.13	19.67	22.48	17.25	24.92	13.63	19.14	16.71	15.95	25.56	16.02	15.38	17.15
		24.23	27.61	14.8	25.57	20.3	16.92	14.38	17.91	15.96	22.19	31.32	21.48	16.97	17.3
		17.96	22.63	15.71	27.83	20.18	15.82	15.62	18.63	18.52	18.11	22.1	20.34	20.97	19.97
			26.06	20.53	21.28	17.46	15.79	12.82	17.67	23.56	13.5	21.93	16.17	27.4	14.54
		25.03	25.59	17.31	23.82	20.47	14.91	13.59	21.29	19.41	13.45	19.49	13.8	21.35	18.42
		21.59	19.9	13.38	30.25	24.04	20.3	12.43	19.66	22.85	12.17	25.5	17.36	20.06	24.34
		24.35	19.71	17.59	24.55	17.88	15.81	17.69	18.28	15.87	18.31	21.18	21.91	20.99	14.82
		22.96	21.13	16.58	25.86	18.87	17.41	20.34	24.9	19.15	15.01	19.41	17.71		21.44
		19.49		21.15		17.43	16.29	15.66	20.1	18.45	16.54		17.22	21.08	13.02
		25.92	31.9	14.76	23.87	16.93	24.18	15.89	19.88	15.74	15.69	32.22	18.92	19.57	12.67
		25.98	26.66	16.19	26.18	20.54	21.3	14.91	17.64	16.52	15.35	25.28	14.38	17.64	19.12
		16.46	25.44	16.75	22.15	19	14.5	16.27	19.32	17.13	13.09	25.49	15.38	18.48	14.66
		18.21	21.95	13.94	21.37	18.01	20.01	12.96	19.57	18.67	17.17	27.92	14.95	19.43	16.8
		17.78	21.14	17.36	20.39	19.19	23.86	17.69	17.97	14.91	14.26	24.27	32.55	22.02	14.47
		17.53	17.9	15.27	18.9	17.8	17.8	13.48	19.77	14.95	13.18	35.74	16.31	19.45	12.92
		19.63	22.73	14.9	22.68	20.2	19.48	19.34	17.53	23.38	19.4	24.41	16.74	17.45	22.18
		19.55	21.99	16.73	24.95	18.84	20.97	14.82	18.98	16.24	12.1	20.72	16.68	18.54	13.38
		19.64	16.22	16.66	19.35	18.99	17.21	17.09	18.2	17.61	12.18	22.2	18.73	19.1	19.85
		26.97	16.66	15.47	19.22	17.99	34.29	16.54	20.24	21.93	11.17	18.9	18.88	16.03	14.36
		17.72	17.01	13.63	17.67	17.13	25.05	15.81	18.57	18.04	22	27.54	21.84	26.79	14.09
		23.29	21.37	17.51	19.59	17.96	24.43	15.22	20.35	19.5	12.84	19.2	19.2	16.41
		15.66	23.14	16.55	16.51	18.55	26.69	17.84	19.33	17.04	16.34	20.79	26.54	15.9	22.03
		16.97	20.56	21.75	16.09	15.82		17.76	20.2	34.7	14.82	23.36	21.6	17.62	18.99
		20.89	21.9	14.07	24.47	22.47	21.43	15.94	17.67	21.39	14.45	26.09	17.22	17.86	19.65
		16.54	28.53	20.61	19.26	17.41	21.07	19.89	17.01	18.69	18.11	18.48	19.22	16.19	18.62
		17.94	17.95	14.06	15.06	19.14	17.05	19.57	22.5	18.62	13.66	21.36	19.29	15.71	19.03
		16.85	21.07	15.73	18.8	19.02	18.52	15.09	19.95	20.17	16.47	23.42	20.76	16.13	23.65
		18.01	17.27	14.44	19.86	17.7	19.04	15.98	17.21		15.07	19.57	20.7	17.99	25.85
		24.62	24.44	13.98	19.87	16.94	24.9	16.43	19.58	16.34	18.12	21.67		17.36	17.34
		17.43	24.93	18.13	19.43	16.02	20.02	19.54	19.61	16.55	13.13	27.52	18.38	18.21	22.36
		18.96	22.47	18.23	16.08	16.23	18.63	16.87	19.1	17.15	14.76	20.7	15.19	16.8	19.58
		22.77	18.9	15.09	18.23	17.28	13.1	16.32	19.25	15.8	15.54	19.88	19.82	24.06	21.9
		14.01	16.77	14.83	15.08	16.98	17.39	19.45	18.77	16.83	18.47	19.82	15.14	18.55	17.94
		15.59	18.86	18.03	19.74	15.97	15.37	17.84	16.28	18.34	16.21	21.38	22.77	19.26	19.67
		19.33	17.02	17.65	20.36	20.56	17.48	15.08	17.76	24.24	12.57	21.47	19.55	16.4	21.2
		19.37	18.7	15.02	18.89	15.69	15.73	18.82	18.27	16.75	13.93	21.73	17.58	17.52	15.94
		12.9	19.91	17.56	16.61	18.19	16.39	18.02	24.27	14.65	14.5	22.07	22.98	20.11	16.6
		21.13	30.13	19.94	17.47	22.8	18.21	22	20.59	14.18	14.66	24.72	15.43	19.22	20.62
		15.46	21.11	16.98	22.48	17.29	16.03	17.84	17.28	17	18.24	17.82	15.61	17.77	16.62
		23.39	19.79	22.02	18.41	16.63	11.5	17.99	21.31	13.89	15.1	20.4	22.38	16.07	20.24
		11.91	19.61	17.96	20.27	20.34	11.98	26.86	18.55	14	12.1	23.11	12.94	15.75	20.01
		11.95	18.88	17.55	18.65	17.03	22.06	23.38	18.49	14.64	14.85	16.23	17.99	15.72	16.17
		26	24.8	17.6	20.11	17.82	12.07	19.8	21.95	19.62	14.43	22.22	18.51	17.39	17.82
		14.13	18.57	21.68	15.78	15.52	17.98	26.19	21.3	16.95	19.27	26.48	13.53	18.08	19.38
		12.47	18.47	21.68	15.69	15.78	14.99		17.4	14.14	16.71	14.76	20.89	21.8	21.64
		18.32	23.13	19.53	22.34	15.5	17.53	24.24	18.58	13.23	18.8	15.44	15	19.79	15.66
		23.3	18.18	19.37	19.02	20.3	17.79	22.87	18.94	14.2	17.95	19.46	18.68	21.09	19.27
		17.02	17.4	20.43	20.8	26.62	16.73	21.23	18.49	14	14.46	16.56	18.66	20.07	17.99
		27.31	18.16	21.58	25.87	18.97	17.17	18.84	17.97	16.38	14.88	16.48	16.38	17.09	19.39
		13.42	19.72		18.51	14.01	15.31	16.86	24.66	20.96	27.99	15.14	12.49	21.62	19.15
		15.46	15.83	23.49	20.66	14.64	17.06	17.13	18.9	14.96	15.68	20.2	15.11	14.54	18.61
		15.77	14.94	26.03	19.26	20.77	15.05	20.38	20.38	13.76	15.94	15	11.8	23.78	21.63
		20.69	20.4	20.71	22.98	15.88	16.17	17.19	19.49	13.47	16.92	13.01	23.43	17.59	16.52
		22.36	22.11	19.65	15.32	18.66	14.29	20.1	19.05	15.27		14.2	19.64	19.08	15.17
		21.51	17.05	19.85	16.74	15.51	16.79	14.61	17.73	15.61	16.47	20.17	15.19	18.65	16.03
		19.58	26.18	15.38	19.48	17.95	17.16	13.2	18.31	15.05	12.7	17.4	13.98	16.04	16.4
		18.14	15.36	14.23	21.89	15.45	14.61	13.23	24.27	15.27	14.85	21.16	13.72	18.52	18.25
		18.98	21.74	17.7	20.94	18.2	14.75	16.2	16.27	15.41	18.2	25.02	19.55	18.44	18.3
		21.25	20.97	15.22	16.7	23.81	12.88	21.31	18.4	13.59	22.23	22.33	11.69	14.96	22.56
		23.7	19.24	14.57	21.61	22.25	18.17	21.25	19.19	16.93	15.85	15.45	19.4	15.8	19.9
		16.87	13.49	16.58	18.51	15.04	14.33	15.75	19.01	13.44	14.79	17.26	11.98	19.96	16.42
		27.86	15.5	14.8	17.15	18.63	14.71	20.13	20.48	15.77	16.3	14.62	14.48	19.11	16.72
		21.24	13.35	18.8	18.76	18.85	20.26	15.56	21.28	15.19	16.89	13.99	14.52	15.35	16.85
		18.32	20.7	13.43	16.65	18.69	16.6	15.72	19.29	15.15	14.95	17.13	19.95	17.98	18.42
		20.75	20.1	14.8	17.27	14.41	15.87	16.56	18.78	16.76	16.38	12.77	16.51	21.22	19
		20.05	19.97	19.94	17.33	29	16.48	14.22	16.86	17.11	12.62	21.74	12.14	17.18	16.73
		19.08	16.46	16.51	18.98	21.59	15.19	13.83	21.72	13.21	16.99	13.62	14.32	21.19	17.56
		24.17	19.12	15.45	21.5	18.14	12.99	19.61	22.79	15.56	22.6	23.71	11.55	15.49	18.01
		19.07	20.18	20.77	21.67	15.91	12.85	15.37	19.9	16.32	13.74	16.93	16.17	15.81	15.73
		17.89	20.43	23.46	23.87	18.31	17.51	18.17	18.67	17.56	12.81	14.29	21.36	16.46	18.89
		19.69	20.27	16.41	23.25	13.84	16.45	17.84	23.76	14	12.83	23.46	15.68	14.83	20.96
		19.91	21.72	18.47	18.85	14.94	13.71	19.47	21.04	21.06	15.82	12.68	13.6	13.6	19.12
		19.48	20.78	14.66	19.3	22.82	13.44	18.13	22.05	18.27	14.05	19.66	20.62	17.18	16.23
		18.79	18.97	15.39	18.92	15.88	18.06	14.88	21.38	17.59	16.87	22.26	13.08	15.86	19.68
		17.69	19.14	20.63	22.81	15.82	22.34	15.57	20.64	18.45	12.71	12.4	15.53	20.9	15.42
		18.48	18.26	18.7	21.78	21.83	19.5	17.67	20.33	15.54	15.01	15.75	15.34	13.65	18.31
		18.96	19.42	18.34	20.84	20.18	18.12	18.86	24.2	18.6	11.54	17.23	18.15	15.89	17.22
		24.99	17.73	16.55	22.64	17.18	13.31	18.02	18.18	16.08	17.8	16.91	19.65	15.92	19.53
		16.77	21.96	18.02	20.64	23.1	14.3	17.24	22.6	18.02	23.11	19.65	14	16.04	16.93
		18.2	21.52	16.58	19.93	23.81	19.05	15.81	20.52	16.51	18.3	15.32	12.37	15.51	15.2
		17.01	18.58	15.89	21.11	21.57	18.97	19.16	21.9	18.24	15.76	22.73	14.18	19.61	15.95
		20.27	16.59	20.32	21.24	17.67	13.85	20.8	19	17.56	20.32	13.42	13.73	14.24	16.64
		16.46	18.12	14.51	19.55	19.87	17.6	18.13	19.95	20.39	12.35	14.6	13.94	14.48	17.68
		19.09	20.77	18.27	21.07	17.49	13.8	15.88	17.46	16.11	15.78	14.18	14.54	14.59	16.92
		18.03	24.14	15.69	20.2	20.81	16.99	17.62	20.73	14.73	18.92	24.81	13.98	20.11	17.54
		18.08	17.85	15.29	21.13	19.89	16.45	18.4	18.3	16.4	21.75	26.7	13.53	16.61	18.88
		17.72	18.59	18.05	19.11	20.2	17.88	21.28	22.37	15.19	14.81	18.9	13.22	18.2	15.54
		15.69	20.96	19.91	20.61	18.36	20.37	19.11	27.82	14.91	14.26	18.07	13.79	16.09	16.84
		16.25	20.9	15.47	26.18	21.32	13.36	20.52	20.96	18.89	12.41	13.09	16.3	18.25	17.72
		15.23	17.36	15.85	19.53	20.59	21.69	18.01	22.53	14.25	17.63	15.28	21.12	21.24	15.4
		18.85	19.7	15.27	19.3	27.96	13.71	15.61	16.49	19.38	21.72	13.66	14.99	14.32	15.31
		18.96	19.41	16.61	19.19	18.42	24.5	18.43	20.8	16.64	19.36	16.62	15.9	17.56	16.02
		14.78	18.63	13.76	20.79	19.38	20.33	19.15	17.41	18.61	17.48	16.51	19.08	18.19	17.28
		15.15	18.05	17.5	20.28	22.66	12.52	16.04	19.44	17.14	14.62	18.21	15.59	20.72	18.96
		16.95	19.17	16.98	19.18	20.62	19.54	20.98	23.35	21.31	21.05	16.97	16.29	15.73	16.75
		26.55	19.79	14.96	18.8	20.91	13.26	15.9	31.59	17.24	16.54	21.77	16.99	17.14	17.5
		17.66	18.51	14.11	16.15	17.67	16.63	21.89	28.96	17.59	21.76	20.01	14.6	15.61	15.18
		15.06	20.46	17.35	19.47	23	17.46	21.65	24.48	18.91	26.27	16.97	18.13	17.6	19.45
		17.83	16.92	13.76	15.32	23.46	16.11	18.69	20.93	16.06	18.1	13.32	17.38	18.02	19.03
		15.22	21.12	14.1	21.36	22.19	13.18	17.88	24.5	17.87	17.38	15.57	14.75	13.57	21.08
		15.55	22.2	16.09	15.22	20.14	18.63	19.5		18.15	19.66	21.19	18.33	12.61	19.27
		15.49	17.09	17.96	19.02	23.61	18.47	19.15	18.71	20.29	16.26	17.85	18.77	17.01	15.05
		18.1	22.09	12.15	20.05	29.17	13.27	15.23	21	16	17.33	18.09	16.7	13.03	13.35
		18.31	19.68	17.12	16.95	28.68	16.31	18.96	24.24	17	20.7	14.06	16.75	16.49	16.93
		18.63	21.05	21.28	21.26	29.17	14.92	15.02	24.3	20.37	17.87	22.32	15.72	15.29	18.31
		14.08	20.18	14.4	20.23	29.58	17.14	27.8	24.81	16.63	20.23	22.25	17.21	16.8	16.67
		17.69	16.98	16.37	22.44	30.71	14.92	17.33	28.43	17.8	18.63	17.83	13.36	19.32	16.71
		13.72	18.07	12.93	15.52		15.04	17.41	23.3	17.4	17.48	16.12	13.13	16.91	15.72
		12.89	19.87	12.92	16.56	25.11	13.58	16.6	23.32	18.1	17.03	15.7	14.44	15.24	11.06
		18.73	17.41	14.77	20.38	22.18	14.62	19.76	20.28	19.49	21.11	16.11	19.02	21.01	18.57
		17.5	17.37	15.62	20.48	21.7	18.28	22.85	20.75	24.27	19.1	14.88	20.22	18.77	13.71
		13.83	21.56	14.58	17.02	19	12.44	18.66	18.19	18.12	18.53	17.6	23.07	17.82	16.67
		15.63	20.27	16.86	15.93	23.56	14.8	18.76	22.74	19.11	16.24	15.76	16.66	15.9	11.87
		19.25	14.91	14.23	17.33	21.63	17.97	15.55	15.49	16.85	19.94	18.01	12.01	21.36	19.53
		19.2	20.36	11.76	20.23	27.27	17.52	16.31	16.35	17.7	26.45	21.3	16.22	17.59	16.09
		21.91	19.95	22.93	19.46	22.32	14.82	19.95	14.55	16.47	17.62	17.86	14.64	18.46	9.45
		12.45	21.64	11.66	20.92	17.44	13.02	20.33	20.66	19.03	19.09	17.49	16.4	18.92	10.75
		13.81	17.09	21.56	18.84	16.41	15.68	23.62	18.14	17.03	16.73	17.4	15.36	20.12	13.42
		17.3	18.24	16.89	18.44	18.23	13.77	16.53	19.06	18.07	20.99	18.86	17.11	17.94	16.38
		12.61	14.15	15.63	20.5	18.37	17.76	19.88	22.37	17.14	17.61	18.66	15.55	18.99	15.35
		13.78	20.67	21.58	19.92	19.08	12.64	19.75	15.98	20.76	16.19	15.64	11.96	18.85	10.91
		23.24	18.58	18.73	20.37	19.24	16.6	16.26	18.62	17.84	16.82	20.68	11.69	17.96	15.82
		14.58	20.7	17.73	19.3	22.42	13.34	22.89	13.77	17.4	14.44	18.25	18.87	17.93	22.67
		17.13	18.72	12.91	20.73	19.97	13.14	17.75	24.02	16.09	13.73	15.39	15.48	18.41	11.98
		19.46	17.82	15.17	19.69	22.8	14.62	15.59	14.59	20.08	15.31	18.81	13.38	19.18	16.72
		15.33	17.69	18.41	21.18	19.53	12.71	18.68	18.45	18.34	15.49	20.94	12.65	17.67	13.8
		17.64	16.64	13.83	20.13	19.54	16.84	18.64	14.18	18.12	16.73	15.68	13.35	18.25	14.15
		15.92	18.82	16.27	19.66	18.45	15.65	19.03	21.5	18.43	17.86	18.13	17.23	17.47	16.51
		14.72	15.61	15.54	20.98	20.77	15.39	19.69	18.21	18.82	14.38	26.43	14.46	16	13.91
		14.47	19.3	20.53	19.88	18.5	14.64	16.34	14.81	19.06	14.41	16.36	17.67	22.44	17.22
		17.54	19.7	13.8	19.81	25.67	13.58	18.94	14.25	14.82	13.65	17.34	15.46	22.24	19.26
		13.86	17.75	15.22	19.47	19.84	13.86	16.41	15.79	19.95	14.56	18.57	20.37	17.86	17.04
		19.1	18.07	20.53	20.08	18.43	14.94	19.44	14	16.35	14.49	15.63	15.48	16.86	15.04
		16.7	20.74	15.56	20.43	18.19	14.2	17.05	19.59	22.24	16.62	15.71	14.05	21.8	15.13
		15.3	25.93	16.5	22.48	22.08	12.63	17.63	20.29	16.25	15.2	22.06	15.58	17.41	15.23
		13.2	18.31	14.61	25.57	16.81	17.33	17.58	18.54	18.5	14	17.53	17.16	22.17	15.64
		14.67	23.71	12.71	27.83	22.46	15.15	19.57	14.68	17.72	27.56	19.7	12.68	23.72	15.15
		15.19	22.53	17.88	21.28	17.05	13.78	16.8	17.01	15.73	12.14	19.65	14.64	17.8	15.16
		17.74	24.78	15.53	23.82	18.53	11.62	18.75	17.74	15.18	13.15	25.22	13.53	21.47	16.08
		16.26	22.31	17.83	30.25	19.91	15.12	19.85	17.7	14.57	15.38	20.02	16.05	20.43	17.18
		13.98	21.45	16.38	24.55	17.65	19.46	22.59	22.69	14.21	14.02	32.28	18.3	20.97	16.23
		13.29	21.02	14.3	25.86	17.38	13.33	22.69	16.17	19.89	13.77	18.68	14.57	18.84	17.54
		22.49		14.01		18.86	14.12	18.61	15.92	15.94	15.94		15.81	26.3	15.76
		16.33	25.06	19.38	20.8	17.16	12.65	19.56	18.57	20.74	22.17	17.97	14.69	23.39	16.26
		17.12	23.54	16.73	20.34	18.03	17.6	17.09	17.52	18.53	14.1	21.88	15.63	18.16	17.27
		16.77	26.44	18.85	25.36	17.62	11.42	19.54	22.39	17.4	15.54	27.72	13.98	20.52	15.22
		19.15	20.61	19.61	15.36	20.47	15.63	18.44	15.29	15.24	20.05	27.57	14.81	21.72	17.35
		19.51	21.04	20.58	16.32	16.58	15.75	22.06	24.7	22.67	18.34	29.01	15.23	19.76	18.91
		14.71	29.08	16.75	17.82	17.39	12.57	18.7	18.95	16.83	15.38	18.3	14.07	17.45	15.65
		19.84	23.63	18.2	23.18	17.25	13.51	17.21	18.05	14.71	14.71	23.14	20.5	16.7	19.1
		19.88	20.1	17.67	14.18	27.43	17.21	18.99	16.46	20.63	16.84	16.01	17.04	23.26	19.37
		17.1	19.27	16.59	16.51	20.48	14.67	21.33	18.11	17.65	19.42	18.89	16.63	31.91	16.19
		20.56	19.68	18.82	15.06	20.99	11.84	17.76	20.57	16.87	15.91	22.88	15.01	21.86	18.32
		18.79	21.07	16.87	18.52	22.49	15.52	17.01	20.56	18.58	15.93	15.92	14.64	18.72	15.25
			17.51	20.64	24.53	22.5	17.8	18.39	24.07	15.83	15.94	20.52	17.73	27.49	18.4
		20.99	27.88	18.52	17.79	16.07	18.94	18.53	17.45	19.56	16.95	19.05	15.27	21.29	21.5
		21.67	17.59	21.67	14.85	17.55	12.96	19.16	19.11	16.15	15.51	21.39	14.95	26.99	16.64
		20.87	18.12	19.65	13.65	22.27	15.51	18.54	23.84	17.97	18.01	21.3	15.44	23.8	17.99
		27.84	18.05	18.47	15.17	22.66	13.19	17.25	17.22	19.51	20.67	27.63	14.16		18.88
		31.55	16.25	20.18	15.52	17.4	14.01	17.52	19.75	22.35	21.56	18.37	14.59	25.56	16.39
		18.95	19.8	14.56	19.58	17.67	15.62	17.04	18.7	15.73	14.61	21.76	14.81	16.94	18.22
		23.26	19.91	20.73	15.02	22.8	15.29	21.72	20.26	20.2	15.84	16.98	18.1	18.6	15.95
		15.77	18.72	16.52	18.03	17.67	16.17	16.51	24.1	23.05	14.74	17.55	14.75	16.8	18.45
		19.63	22.94	16.57	18.61	21.57	19.91	16.83	17.61	22.3	16.13	24.6	15.58	15.96	19.11
		15.93	16.3	18.22	16.89	27.46	15.91	17.06	20.7	17.09	18.15	20.92	14.3	19.55	20.34
		17.03	20.95	22.53	17.88	19.07	14.39	16.13	18.42	20.97	14.19	22.42	12.97	23.79	17.57
		17.68	27.58	13.33	15.36	16.92	15.03	17.65	19.98	19.63	15.79	24.8	14.49	25.72	26.02
		16.29	17.9	19.87	16.87	21.49	14.21	16.2	18.87	16.73	15.75	21.85	17.45	29.77	17.88
		18.28	15.88	18.47	14.88	16.03	15.2	19.42	22.25	20.23	13.76	17.09	15.7	14.41	17.94
		21.55	19.84	19.23	17.14	20.52	14.58	17.78	19.2	20.31	18.45	16.71	18.41	16.44	13.28
		15.17	18.11	16.63	15.33	17.69	14.72	16.19	20.03	15.88	19.63	20.85	16.56	15.48	18.02
		20.67	20.07	17.27	16.06	17.98	14.98	14.59	18.59	15.32	18.94	20.66	13.74	15.31	15.35
		18.09	16.21	15.07	18.15	23.73	19.86	17.36	22.03	20.52	14.31	16.55	15.72	19.87	20.35
		16.59	20.27	18.76	16.34	20.98	14.36	15.05	20.23	16.1	13.11	20.28	17.34	13.68	13.04
		23.68	16.61	13.93	17.2	20.55	15.9	17.6	20.54	23.23	13.09	21.97	15.94	20.94	17.47
		19.99	16.45	15.82	18.9	27.12	16.33	14.3	17.96	28.59	21.01	21.72	17.43	22.02	14.18
		16.55	30.03	16.84	14.47	19.33	21.53	16.06	19.74	20.11	15.37	16.54	13.55	19.63	33.25
		16.64	17.65	20.52	17.69	17.56	17.91	24.46	17.25	18.16	19.83	16.1	17.45	17.93	17.99
		16.83	17.19	18.91	18.05	17.61	13.56	15.78	17.54	20.02	13.12	20.13	13.88	14.85	18.88
		19.33	16.73	18.19	19.76	21.12	20.35	15.53	22.38	23.71	13.94	22.15	15.2	24.68	22.65
		14.07	18.49	19.11	19.82	20.5	14.78	16.02	17.87	21.27	14.51	20.01	18.2	22.11	17.1
		19.71	15.8	16.68	18.79	20.85	15.1	15.57	23.24	13.63	13.46	19.23	15.87	18.56	19.49
		25.63	21.55	18.09	15.71	21.16	14.55	16.55	20.58	16.1	17.42	23.66	14.7	22.15	21.58
		19.1	16.6	17.25	18.09	19.35	16.61	15.2	17.26	17.89	18.62	19.18	19.89	15.27	22.89
		18.9	20.28	17.02	21.22	22.77	15.04	14.15	23.93	20.22	22.61	19.02	17.38	15.6	23.68
		16.51	19.81	15.68	21.37	28.27	16.78	19.15	20.54	21.96	14.77	20.3	17.06	21.68
		19.66	18.51	15.79	17.94	21.32	16.37	15.67	15.92	15.96	14.14	20.89	18.05	21.98	30.03
		17.46	17.44	15.49	19.14	20.88	13.84	17.8	17.16		16.67	24	20.84	18.76	20.86
		17.96	18.51	15.85	20.22	19.67	16.57	25.32	20.96	19.13	15.05	25.22	17.46	18.76	22.65
		21.01	16.17	16.77	18.14	20.34	22.82	20.58	19.61	16.66	17.21	25.03	17.94	19.93	32.85
		17.93	22.08	16	20.04	18.78	17	19.34	15.35	16.86	18.41	22.04	16.86	18.57	16.57
		17.11	18.92	15.27	18.18	24.46	16.69	17.4	14.28	17.93	14.93	20.41	16.75	20.05	16.36
		22.67	25.56	17.8	22.48	18.81	15.69	16.08	15.3	21.21	19.2	19.72	21.89	20.47	15.63
		18.27	19.33	18.88	15.87	27.7	16.79	17.64	20.68	28.34	18.12	22.92	18.03	16.17	16.15
		16.62	18.97	18	18.99	21.45	22.56	17.71	19.4	19.08	21.5	23.07	21.11	21.86	13.55
		18.13	18.27	17.81	14.43	21.89	19.42	18.23	22.54	15.54	20.58	20.76	17.04	16.47	19.27
		18.27	19.25	14.21	19.89	17.86	20.36	16.77	23.58	22.41	13.88	21.38	22.54	18.43	21.44
		17.36	21.35	16.09	22.82	19.48	18.33		23	16.51	16.04	16.31	19.49	18.7	13.34
		21.72	19.82	15.61	16.04	19.17	14.97	15.51	19.47	14.29	15.76	17.51	20.74	19.15	22.23
		16.63	19.32	15.79	16.5	18.85	28.8	18.24	18.11	16.3	16.22	25.75	22.36	17.2	12.45
		15.88	19.09	14.9	22.28	22.06	21.19	23.39	22.66	15.43	19.06	16.34	33.62	20.12	13.5
		28.08	24.62	17.99	15.02	21.71	25.18	21.82	17.74	21.7	17.74	19.51	20.08	19.38	12.16
		12.72	17.94	17.12	19.17	19.87	23.84	19.93	21.62	16.32	15.01	18.56	23.32	19.82	13.86
		18.12	17.85	18.89	21.24	22.55	17.06	19.25	19.06	18.55	18.54	23.87	21.51	20.32	11.89
		11.81	20.5	19.14	16.29	16.87		23.69	20.03	16.37	13.3	17.05		20.83	15.77
		18.36	21.11	15.7	16.8	21.37	19.94	19.91	17.43	15.83	22.09	19.86	24.41	23.01	21.21
		17.48	17.12	14.55	16.08	20.68	21.64	14	17.17	16.27	20.38	18.4	22.64	19.31	17.14
		17.71	16.76	15.89	18.6	20.05	26.94	16.55	22.6	15.85	20.62	22.62	20.58	20.73	17.61
		22.26	17.51	16.96	16.44	22.22	16.19	17.28	24.81	16.27	18.84	17.63	17.91	20.69	14.4
		12.39	19.57	15.7	16.61	21.65	26.17	18.3	19.85	21.41	16.79	21.69	18.8	21.41	17.6
		13.38	15.64	19.01	16.74	21.66	15.12	17.29	24.5	17.41	16.6	21.53	18.92	21.08	24.01
		17.48	18.86	17.36	17.77	22.02	24.32	17.34	19.95	16.45	17.66	19.75	15.91	30.22	15.27
		19.41	17.64	14.53	18.78	18.55	21.9	19.85	21.9	20.15	19.74	23.73	17.51	23.72	18.03
		21.53	18.99	18.09	16.7	19.37	19.05	13.18	20.99	26.12	23.99	16.57	19.33	21.83	15.7
		15.41	16.9	22.77	23.83	19.23	13.48	13.42	22.39	15.54	19.48	19.68	17.03	21.38	16.54
		16.1	16.95	20.33	20.71	18.36	19.87	16.81	24.46	14.49	21.97	17.17	17.08	23.39	14.09
		19.4	18.05	18.84	19.84	18.89	20.5	16.94	24.19	16.87	21.57	18.76	18.28	20.95	23.48
		15.07	17.69	18.16	17.58	20.98	20.58	16.65	19.79	14.97	22.4	28.43	16.69	18.96	17.4
		18.05	16.5		17.33	19.12	14.63	15.42	20.25	20.3	21.15	19.37	20.75	21.96	16.43
		16.58	16.46	21.84	20.99	19.44	19.19	17.16	20.95	17.08	21.36	19.17	15.9	21.31	18.35
		16.9	18.17	15.1	16.63	18.63	18.31	18.6	20.2	18.01		23	16.45	21.86	18.39
		25.04	16.77	16.41	17.56	32.65	15.06	14.57	22.97	14.03	21.32	19.12	17.71	20.03	17.08
		16.27	14.12	20.5	19.26	28.74	18.3	16.09	20.69	16.42	20.57	20.56	16.47	21.09	24.41
		19.68	18.84	20.18	20.5	19.85	13.92	15.52	23.68	16.62	20.18	22.05	15.85	24.11	13.17
		16.23	17.01	21.17	20.49	17.79	13.37	13.92	29.52	15.55	18.11	17.48	16.45	20.17	15.7
		20.98	18.74	19.76	17.86	20.82	20.5	17.39	27.78	14.7	17.45	19.3	19.16	22.9	16.96
		17.94	18.32	25.78	19.73	18.94	19.95	15.26	23.03	14.15	18.14	18.61	13.67	19.13	19.31
		18.92	20.02	16.62	19.11	22.41	19.14	14.79	25.06	17.62	19.56	17.74	17.45	18.52	14.06
		15.95	18.42	19.66	19.06	15.77	17.42	17.09	23.74	15.06	17.93	26.33	13.39	23.35	19.87
		20.14	18.79	18.49	23.1	19.81	14.9	16.75	26.01	20.56	30.06	17.66	15.67	18.91	14.09
		16.89	18.53	13.25	17.44	16.5	14.63	16.6	25.35	18.19	15.2	17.76	20.04	22.95	17.42
		17.71	19.17	17.74	18.65	36.18	16.37	14.28		20.44	14.15	16.77	15.01	19.41	25.21
		18.05	15.31	17.19	17.98	16.37	20.46	15.61	33.34	18.74	13.69	16.45	22.45	23.44	19.93
		22.58	19	17.15	20.3		17.25	19.94	30.46	16.54	21	19.37	16.42	21.63	17.71
		19.43	20.23	14.4	21.03	34.38	16.1	18.09	25.52	13.64	14.71	26.08	15.82	20.49	18.5
		18.48	19.3	17.69	20.98	31.22	14.71	15.73	29.02	15.87	13.55	18.76	18.68	23.47	16.36
		14.95	17.68	18.37	19.32	26.48	20.95	18.22	33.22	16.47	18.34	16.23	18.41	20.62	15.69
		15.76	17.99	17.91	22.16	21.87	20.3	15.51	26.09	15.91	15.13	18.14	18.77	21.5	16.77
		17.06	15.71	13.43	18.5	26.01	20.95	16.38	25	21.4	17.03	18.34	17.18	23.03	15.61
		15.83	19.12	15.35	20.04	29.87	19.24	13.9	24.72	17.74	13.36	20.88	18.02	22.98	16.7
		17.02	20.93	14.98	20.04	31.58	21.54	17.25	21.38	14.8	16.6	15.82	15.12	23.44	21.41
		17.76	17.52	18.94	20.81	28.11	17.78	15.01	28.42	13.26	16.62	18.98	15.25	25.82	17.99
		20.57	16.16	19.55	18.74	26.02	19.57	15.09	21.87	17.09	16.89	14.71	14.96	22.78	15.96
		20.26	17.5	21.85	17.09	21.38	21.94	21.79	24.03	16.85	14.66	21.05	14.06	21.68	16.4
		23.77	16.81	15.52	16.53	21.12	15.77	18.86	26.06	16.35	13.2	18.62	14.32	25.44	18.98
		10.98	21.54	13.12	23.51	22.07	23.88	17.08	20.21	13.16	13.87	17.91	12.71	20.64	14.31
		12.01	15.39	16.09	23.72	23.76	20.05	15.28	21.58	15.09	18.53	16.48	16.88	26.89	15.53
		21.04	21.84	15.02	25.2	21.97	16.65	17.99	23.29	15.94	15.68	20.42	13.96	22.39	15.77
		16.83	20.32	13.26	15.23	20.87	16.3	20.12	22.65	15.53	15.05	15.78	17.12	24.67	13.77
		17.26	17.14	15.11	17.53	26.95	18.2	21.86	23.34	18.26	15.64	18.08	13.45	23.34	17.12
		12.02	19.62	15.16	20.67	23.51	18.32	15.85	20.83	17.51	12.89	18.21	13.46	16.75	16.13
		13.6	13.83	14.4	23.21	21.95	14.16	17.31	32.22	18.83	14.92	27.72	14.78	17.87	13.27
		17.42	20.47	15.36	19.36	21.49	19.93	22.36	24.58	12.47	14.36	18.94	14.53	21.44	13.64
		14.69	16.19	17.04	17.84	22.59	12.97	18.73	21.54	16.14	13.45	18.8	13.74	26.94	13
		21.43	16.67	17.4	16.34	24.5	15.15	17.73	18.7	14.38	13.48	18.01	14.1	20.95	15.49
		18.03	15.97	12.76	22.32	20.15	14.16	18.07	25.07	16.92	14.4	19.01	13.94	22.82	15.06
		22.08	15.02	15.58	19.61	24.7	15.9	13.83	23.98	17.51	21	19.05	14.9	18.76	14.35
		16.14	23.41	15.21	15.26	20.08	15.35	19.1	18.97	14.44	15.03	21.09	12.18	24.16	16.88
		25.07	22.43	13.54	15.06	27.11	19.99	13.82	19.37	20.69	18.89	30.88	13.82	21.14	18.4
		16.44	18.54	17.41	20.57	20.92	18.33	26.21	23.61	14.63	16.51	21.39	18.83	18.66	12.64
		16.77	19.1	13.46	16.24	19.75	16.77	19.54	23.92	16.18	13.72	18.87	13.58	25.77	15.18
		16.35	16.78	14.88	19.25	20.62	21.56	17.73	21.19	18.43	12.21	20.53	15.21	24.09	16.49
		19.6	18.71	12.56	15.68	25.82	17.37	13.73	18.29	12.66	14.68	20.86	17.96	28.62	11.84
		22.88	17.75	15.65	17.69	18.42	15.26	14.18	20.79	13.03	16.55	28.69	15.53	16.7	13.91
		21.29	20.18	16.85	23.97	22.11	15.78	20.22	18.57	15.2	15.54	20.92	13.97	23.26	12.04
		17.06	28.16	14.44	19.74	20.26	16.75	18.65	17.15	20.38	14.96		13.09	25.09	11.87
		17.56	20.37	14.39	15.11	23.54	18.93	18	24.6	16.26	12.53	22.16	14.25	28.92	15.03
		19.81	21.16	14.63	17.27	24.47	20.12	19.26	19.24	18.28	12.99	16.8	14.83	17.01	18.26
		17.62	23.62	13.68	18.46	25.67	15.94	18.33	16.7	14.2	12.73	16.35	16.44	33.99	16.8
		19.03	24.74	16.36	15.59	22.86	15.46	19.35	23.89	16.73	14.24	18.61	12.44	32.78	13.31
		21.17	17.63	13.99	16.02	17.23	22.71	19.1	20.01	13.84	13.24	19.35	16.16	23.4	13.17
		19.13	25.09	13.86	28.01	17.77	20.67	18.63	20.58	16.43	12.23	21.31	18.76	20.01	13.43
		19.87	25.89	15.73	13.6	24.67	18.76	19.37	16.7	17.31	21.12	23.75	15.21	28.7	15.49
		22.07	29.83	16.83	14.21	22.41	17.24	17.74	23.74	18.26	17.06	22.32	16.28	39.52	10.85
		21.01	22.61	17.11	13.32	19.83	16.54	16.36	19.15	23	14.16	15.63	21.8	20.28	10.5
		20.54	21.07	16.52	19.63	16.83	23.2	18.45	21.15	14.99	13.78	15.11	15.73		12.52
		17.82	27.53	16.16	20.17	21.69	17.21	18.63	23.46	17.07	17.55	19.79	12.67	32.59	9.98
		24.99	26.27	16.36	14.7	21.94	19.41	17.7	20.51	20.12	14.77	29.55	13.48	28.33	11.87
		19.35		16.65	20.44	25.14	22.24	16.18	22.95	19.08	15.99	15.36	15.37	19.71	15.62
		23.16	27.05	19.51	20.71	18.59	20.39	23.2	19.04	16.55	16.19	18.42	16.59	26.83	17.5
		16.87	18.81	14.33	19.1	21.69	21.92	20.29	23.78	15.83	14.58	17.67	14.01	29.72	13.35
		15.86	18.78	15.76	15.89	19.51	23.05	17.02	19.61	16.43	14.84	16.58	16	19.46	17.45
		18.29	22.17	14.82	16.27	23.73	23.2	18.63	22.89	17.94	14.02	17.74	14.64	21.08	11.25
		20.54	22.18	15.31	20.57	22.38	20.92	14.82	20.94	18.76	16.52	20.71	17.71	17.55	10.54
		15.01	21.55	14.36	23.23	20.31	22.92	17.19	23.31	18.73	15.52	16.59	16.86	20.66	13.7
		17.91	16.26	13.87	23.02	21.11	22.58	19.53	18.89	19	15.96	16.61	18.88	22.09	11.22
		19.29	21.97	17.88	17.05	21.7	22.91	20.32	17.18	19.67	18.07	17.68	18.75	22.93	12.87
		23.4	18.69	14.97		22.09	21.3	22.16	19.22	15.59	19.17	20.65	13.75	19.55	14.96
		14.08	19.37	17.02	18.07	20.35	21.88	14.55	21.73	16.96	16.29	23.66	15.91	18.18	12.24
		40.37	18.73	16.16	19.72	19.36	19.45	20.44	19.89	18.82	15.13	21.57	16.83	19.58	12.54
		24.81	17.38	14.92	18.09	19.45	22.03	17.32	16.45	17.59	15.2	18.36	15.73	22.43	12.87
		17.81	17.36	12.47	19.45	22.17	21.72	17.23	20.5	15.45	20.15	19.83	19.57	20.4	11.27
		27.4	19.47	20.02	21.12	19.26	21.3	18.4	21.48	18.2	15.91	20.93	16.3	19.52	15.7
		17.09	18.68	19.23	18.58	19.35	23.69	19.35	22.34	17.31	17.94	19.78	17.99	19.96	12.94
			17.54	15.04	20.23	21.63	22.64	17.82	20.85	20.76	17.74	23.15	16.65	20.48	16.27
		23.54	17.57	16.02	16.82	20.06	20.28	17.49	19.67	15.97	17.41	22.95	14.56	18.15	15.34
		20.72	20.79	16.71	19.91	19.51	24.15	13.59	22.67	21.02	17.86	25.05	16.74	17.61	12.44
		20.18	17.26	13.86	16.84	16.81	20.9	17.07	20.67	19.71	22.31	19.18	14.18	18.82	12.76
		18.09	18.53	16.89	22.59	23.3	21.69	18.48	27.32	21.62	17	25.69	15.14	19.08	12.54
		31.27	16.75	13.66	16	17.75	20.69	14.23	19.52	18.39	17.49	21.58	14.07	15.56	17.38
		21.35	19.67	21.02	17.66	19.26	19.7	19.21	20.12	16.46	19.2	17.8	16.01	16.86	12.92
		14.74	20.95	13.57	17.58	18.81	21.23	16.29	18.44	13.85	18.61	21.73	18.32	17.87	21.11
		18.46	22.65	14.21	15.76	20.87	21.36	14.62	26.59	15.4	19.28	21.04	14.32	19.76	13.52
		15.71	22.11	17.63	14.47	18.06	19.25	24.9	21.38	18.69	16.55	20.92	13.61	16.52	14.33
		20.7	19.01	15.9	17.59	16.83	25.19	19.1	19.65	14.96	17.3	23.7	15.82	19.78	14.49
		16.24	17.65	17.38	14.16	21.63	19.74	18.74	17.48	19.36	19.48	21.3	16.37	21.95	17.54
		15.77	19.86	15.29	19.96	19.32	19.07	19.55	22.29	19.57	16.58	16.22	15.36	15.17	12.82
		16.7	19.16	17.32	15.33	19.86	24.24	15.2	17.67	17.19	17.41	17.12	18.71	16.1	15.36
		15.79	22.61	16.67	15.87	18.96	20.26	16.09	19.46	21.42	15.71	23.49	12.82	16.43	12.77
		15.78	22.37	12.08	16.62	16.96	17.91	15.19	18.51	16.62	22.22	19.2	12.1	18.18	15.46
		16.06	19.03	13.65	13.17	20.51	17.31	18.42	18.85	19.15	20.67	22.85	13.54	15.67	15.64
		19.82	20.49	14.25	14.34	18.58	16.63	17.33	17.42	18.8	14.85	23.2	15.69	16.92	16.68
		17.27	22.6	14.83	17.44	19.44	18.29	15.12	25.23	21.47	14.24	16.86	18.7	15.71	15.61
		13.97	19.87	17.53	20.35	16.87	22.03	16.66	20.16	16.42	18.96	22.84	17.25	14.85	14.87
		15.69	18.48	13.48	21.86	20.16	19.16	17.59	19.92	15.93	21.39	24.28	12.67	17.12	18.47
		15.6	22.2	15.41	15.76	25.3	17.8	14.57	18.08	20.74	15.39	24.74	17.96	13.63	13.97
		17.09	22.01	16.37	17.31	21.06	15.13	14.98	21.36	21.7	16.36	18.34	19.22	14.15	13.44
		18.35	19.67	15.77	17.63	24.96	22.85	13.31	20.33	18.07	12.75	20.65	13.07	17.65	21.19
		15.16	18.25	16.09	18.1	19.46	14.79	18.83	19.07	18.16	14.05	24.3	15.63	16.17	16.61
		16.08	20.92	13.17	14.2	19.5	14.45	13.62	23.61	22.21	15.12	19.61	22.94	15.97	14.02
		15.13	18.73	12.64	19.22	23.39	14.35	22.05	26.36	16.93	18.35	25.92	15.29	19.04	14.72
		19.9	20.29	17.93	13.23	20.42	24.05	16.04	19.82	19.56	12.33	17.52	12.13	18.93	15.93
		15.53	17.3	14.88	14.29	21.35	18.11	13.78	19.01	20.89	22.1	23.7	14.97	18.42	14.96
		15.67	20.13	14.92	18.5	19.91	15.22	15.66	18.06	16.07	19.28	19.33	13.03	15.39	16.79
		15.91	20.63	14.05	16.49	20.18	19.24	13.59	19.77	19.06	11.99	18.48	16.35	14.23	17.48
		15.69	19.22	20.54	19.52	20.52	17.88	16.99	29.63	17.89	14.41	23	14.6	20.93	13.43
		15.6	17.72	16.6	14.16	28.56	14.05	19.63	22.69	16.4	14.16	21.9	15.03	17.93	15.18
		16.98	19.53	15.74	14.74	21.03	17.01	14.99	18.25	14.99	14.02	26.7	16.12	15.73	15.51
		17.05	16.18	16.64	18.6	18.92	14.7	22.33	21.21	17.11	13.67	19.63	12.05	20.77	16.84
		12.34	17.6	12.84	17.94	21.58	17.91	15.49	19.44	16.04	12.62	19.88	17.94	14.79	16.47
		16.47	19.63	16.08	16.26	21.65	13.79	18.53	20.51	21.25	16.32	18.6	15.62	23.37	16.27
		14.23	19.3	15.86	14.73	20.73	11.71	13.62	28.32	24.96	13.67	20.77	19.11	19.9	16.24
		18.33	20.3	13.41	21.49	22.83	12.73	15.63	34.28	17.2	13.62	19.44	18.07	19.93	15.43
		18.63	25.03	18.99	17.33	19.49	11.1	14.26	23.92	16.2	13.34	18.82	12.24	18.05	15.79
		17.54	17.87	17.11	17.35	17.69	19.41	17.69	23.37	18.18	25.51	20.99	12.08	19.15	13.13
		18.12	20.51	13.77	19.16	19.55	24.1	14.24	22.02	14.94	14.22	24.16	12.09	18.97	13.16
		14.41	19.65	16.77	15.7	21.31	20.15	13.5	24.91	16.01	13.91	20.92	14.04	23.25	15.4
		14.59	19.57	18.8	16.82	22.41	26.25	16.01	22.27	15.1	18.75	20.39	13.3	15.92	16.74
		13.54	17.06	13.67	13.73	23.52	13.43	15.7		21.15	16.28	23.3	17.06	13.36	18.62
		12.03	17.58	13.03	19.85	20.76	21.46	22.31	26.37	17.32	15.18	22.47	15.24	22.02	16.34
		10.56	19.81	17.8	19.59	21.61	13.79	17.74	27.65	19.56	16.41	17.68	12.62	18.43	16.98
		16.03	19.02	13.07	18.4	23.38	17.5	15.99	21.17	25.87	14.2	19.87	13.01	25.02	15.4
		17.03	20.71	17.84	14.68	23.36	17.94	20.99	29.9	19.61	13.18	18.32	17.33	12.84	17.53
		17.03	16.56	14	18.23	22.18		19.03	19.65	22.17	19.21	28.41	19.26	14.12	13.29
		11.8	20.41	12.78	14.99	28.01	28.23	17.67	29.78	23.25	14.4	18.96	14.54	15.58	14.3
		16.78	19.98	16.83	17.89	24.66	26.53	16.86	25.27	17.29	19.45	17.07	13.89	20.39	12.76
		21.01	21.28	17.25	16.95	22.94	32.41	19.67	19.49	18.09	16.13	17.16	12.39	26	12.25
		17.82	17.39	18.75	16.49	23.06	22.71	15.61	19.33	18.36	13.41	26.97	16.24	19.44	18.91
		20.95	19.72	17	12.81		23.91	19.53	21.72		18.09	19.63	16.33	27	15.04
		12.91	19.63	13.82	14.49	26.29	23.62	24.33	17.07	22.35	12.58	19.62	17.05	20.5	15.2
		18.31	17.45	15.62	20.06	21.85	20.78	21.44	18.57	17.61	15.72	19.24	16.5	20.74	14.44
		17.49	22.39	14.88	21.89	20.98	25.53	24.46	18.77	20.48	14.18	16.53	12.17	20.71	13.47
		16.34	20.6	14.33	16.04	21.85	20.48	20.72	19.41	18.3	17.59	18.13	16.78	19.03	15.54
		17.11	18.95	15.63	17.13	23.09	27.82	23.18	22.88	19.72	14.95	20.98	16.81	16.24	16.65
		13.08	16.42	20.18	13.33	19.61	17.93	25.38	20.83	21.78	14.02	14.22	14.71	23.28	19
		16.62	23.19	17.68	17.17	23.6	24.01		20.19	25.04	20.62	17.48	16.41	16.69	15.91
		14.58	18.78	14.72	18.66	20.94	20.88	24.33	22.97	20.24	12.22	16.03	18.06	18.97	15.51
		22.96	21.31	17.55	15.74	18.28	33.75	18.26	23.14	20.99	13.62	14.1	14.34	22.42	15.18
		20.13	20.36	15.21	19.23	25.95	20.73	18.63	19.41	17.55	16.17	13.85	16.66	18.79	12.84
		18.15	20.22	15.54	11.48	20.42	21.77	21.99	25.2	14.98	12.83	15.29	17.29	17.97	13.76
		17.68	22.44	15.21	14.63	19.3	20.26	21.72	21.96	17.06	14.6	13.98	13.87	15.26	20.61
		17.99	23.05	16.4	16.72	17.98	24.76	16.48	21.03	16.16	13.34	16.74	16.24	17.06	15.39
		18.37	17.63	19.22	14.22	16.92	19.91	20.25	21.15	17.55	19.36	16.4	18.07	21.2	16.4
		15.14	16.9	14.24	11.36	16.71	22.52	31.77	27.92	17.29	14.36	14.39	20.23	16.81	18.58
		18.52	20.79	17	21.32	14.99	24.1	19.7	23.33	20.96	20.63	22.93	19.25	23.73	16.12
		25.88	19.72	16.2	20.78	15.84	21.92	22.02	23.84	20.95	13.06	20.18	12.78	16.82	20.59
		17.99	19.26	16.26	11.55	17.45	24.68	16.7	22.59	16.79	15.33	19.97	17.61	22.48	19.85
		15.98	25	13.09	10.91	16.68	24.44	15.87	22.54	17.79	25.62	17.96	15.3	19.47	22.32
		15.28	23.19	17.56	14.17	15.49	21.48	16.45	22.68	15.93	16.55	15.54	14.21	23.61	21.08
		17.25	21.33	16.35	18.3	20.78	20.34	23.73	25.84	15.6	14.31	18.08	16.74	18	18.34
		16.26	16.14	13.46	15.16	18.27	25.54	22.67	21.77	17.85	15.86	18.4	20.58	19.04	19.55
		19.27	22.14	15.35	12.69	19.94	21.68	19.56	24.72	18.76	13.63	23.84	21.57	19.89	18.9
		20.48	16.44	17.7	16.18	18.1	20.21	17.71	21.05	18.04	13.85	19.11	16.52	20.27	18.37
		17.37	21.15	18.25	18.74	17.95	21.73	15.34	21.35	22.42	15.47	21.5	18.59	17.92	21.07
		18.9	17.71	21.59	14.29	18.76	23.75	18.49	24.76	18.39	18.91	24.47	17.02	20.15
		18.57	19.7	15.84	14.23	18.5	21.96	26.32	25.12	16.42	15.3	17.08	28.45	18.32	14.67
		16.54	20.04	19.29	14.52	22.73	21.48	18.93	23.22	20.64	14.2	16.25	18.81	21.69	12.82
		19.37	17.74	16.42	18.35	19.16	19.46	15.03	25.59	18.54	13.74	19.74	19.09	20.61	14.33
		16.62	21.08	19.98	13.33	24.36	25.98	20.46	22.1	17.59	13.47	21.56	21.87	17.93	19.68
		17.22	20.54	16.43	16.41	17.05	19.93	21.96	26.41	17.8	14.15	16.5	20.67	20.7	17.34
		15.99	20.55	17.88	20.3	22.37	23.53	15.95	24.5	23.32	16.3	16.31	21.89	23.42	16.47
		20.72	17.84	16.06	14.39	22.97	27.51	18.75	27.8	18.66	13.33	16.87	22.29	19.42	16.76
		15.8	16.82	19.95	14.08	19.83	19.44	18.48	27.12	19.04	16.49	23.51	23.8	19.25	17.21
		17.93	17.29	14.29	13.1	21.47	22.8	22.74	22.35	22.84	13.19	20.84	20.71	20.01	17.51
		14.77	18.3	15.55	17.7	18.64	17.57	19.32	29.74	19.63	15.8	25.55		21.39	18.07
		16.85	16.21	17.81	19.87	21.9	17.09	17.23	23.23	19.47	15.67	21.66	23.5	19.44	22.41
		17.01	22.77	19.42	16.1	16.48	25.7	14.7	26.72	20.11	13.49	27.1	22.03	20.39	15.06
		16.91	17.3	17.62	14.7	28.26	20.55	16.72	23.68	21.26	15.09	20.02	21.19	18.24	15.03
		15.76	17.5	13.4	17.81	19.94	21.76	17.95	21.24	18.73	13.52	27.29	16.49	19.43	15.63
		14.5	18.34	18.04	16.6	15.46	28.87	19.01	24.1	19.17	18.03		20.8	21.91	13.37
		17.72	18.34	20.53	15.29	21.89	25.36	16.57	22.42	21.57	14.46	21.95	18.26	18.56	11.19
		18.34	17.51	21.38	17.85	24.86	19.69	17.65	28.31	21.86	17.62	27.46	35.84	18.53	14.71
		16	20.2	30.35	18.38	18.66	17.07	24.89	19.95	20.48	17.11	22.63	19.57	19.75	15.56
		15.42	17.09	18.86	14.32	18.07	17.77	15.97	25.57	18.95	18.18	21.4	15.96	18.22	12.98
		14.7	16.42	18.74	16.18	28.09	18.94	18.01	22.38	22	16.94	23.02	15.08	16.37	15.02
		19.19	20.61	16.49	16.28	20.55	22.01	22.87	21.74	20.43	20.26	29.02	14.48	17.07	15.31
		16.38	21.81	16.23	13.25	24.54	23	17.88	24.31	18.02	15.66	21.09	19.31	22.23	15.76
		16.27	19.62	21.96	13.86	18.81	24.67	18.47	28.78	17.71	18.4	21.64	20.86	24.23	14.3
		19.48	18.55	20.62	17.74	21.14	18.65	16.15	35.39	17.18	14.62	23.09	21.93	23.51	18.13
		18.73	18.98	21.68	19.38	22.81	22.52	16.37	20.96	20.32	16.94	23.87	16.1	20.23	14.61
		14.83	20.36		14.71	26.22	21.36	19.77	21.9	18.58	14.6	21.3	15.77	19.77	15.62
		17.04	20.91	18.63	13.76	20.72	21.31	15.63	21.6	20.46	19.01	21.83	19.25	22.08	16.43
		18.8	25.02	18.8	17.22	23.55	22.07	15.79	23.45	25.54	16.72	18.13	27.85	20.19	15.16
		18.55	27.19	19.92	15.31	19.74	18.7	18.26	25.2	21.79	25.72	16.98	20.66	27.13	13.6
		21.31	26.84	21.72	13.23	20.51	22.28	16.67	22.19	17.84	18.79	20.48	16	21.51	14.46
		15.13	22.53	20.81	14.01	19.74	20.11	16.86	25.75	17.43	17.65	20.35	21.67	23.53	15.89
		19.49	24.77	22.38	16.63	29	21.43	18.74	26.23	21.36		19.93	22.35	22.81	16.99
		16.26	27.45	22.13	16.79	21.93	19.29	18.48	23.79	20.47	14.93	19.88	19.52		14.39
		20.17	23.57	15.81	17.45	19.06	21.04	19.61	23.34	19.85	13.6	21.92	20.82	26.88	15.97
		19.17		19.67	15.82	24.19	23.96	16.61	21.62	18.97	13.26	20.4	21.3	25.02	14.6
		23.61		15.81	19.07	23.05	22.52	20.62	24.51	16.77	17.13	25.87	21.85	27.35	16
		15.69		18.71	14.39	20.77	21.62	16.66	23.1	17.7	16.01	22.87	16.48	27.61	19.97
		20.36		15.77	14.86	18.84	22.56	17.36	35.16	17.19	15.59	19.93	14.7	27.79	13.73
		21.94		15.27	17.86	19.72	21.67	23.58	19.15	16.1	18.89	20.22	15.06	24.4	17.1
		15.11		14.86	15.89	20.41	23.49	19.94	24.73	16.1	22.07	21.34	14.17	29.97	14.51
		15.26		16.94	15.4	24.36	23.34	19.05	22.86	16.55	21.14	22.26	20.33	24.32	17.91
		14.67		15.58	14.35	24.69	24.92	17.82	21.08	19.81	20.21	21.04	23.3	20.86	22.47
		18.79		18.6	13.89	20.15	23.66	19.99	16.02	16.2	14.98	23.91	18.03	23.83	15.8
		20.26		17.18	15.88	19.29	19.88	14.72	20.94	19.74	14.27	16.27	13.69	22.38	16.19
		24.06		13.46	17.14	20.26	21.51	14.56	15.27	19.88	17.74	15.62	23.48	23.24	18.23
		19.69		17.47	16.41	24.32	21.55	20.24	20.4	19.43	13.53	15.57	15.31	26.62	18.75
		28.76		15.39	18.88	23.42	21.44	25.88	19.98	16.95	12.25	16.16	13.06	22.3	14.81
		17.65		16.67	16.76	21.02	26.31	16.37	21.01	17.82	14.97	16.35	11.26	21.95	18.85
		19.78		15.62	19.2	21.83	18.06	15.67	14.33	24.15	19.83	18.92	23.77	21.97	14.76
		15.02		11.23	15.37	24.25	23.5	14.39	20.79	16.84	14.98	15.72	12.9	18.82	16.85
		21.16		17.99	18.12	25.96	21	19.53	23.55	18.87	12.78	18.71	18.46	19.78	20.89
		21.09		15.87	17.42	24.09	18.71	18.84	15.75	21.64	13.53	24.38	27.93	21.12	15.56
		18.69		10.94	15.97	19.4	18.49	17.17	14.98	18.42	15.26	15.58	21.52	18.36	18.85
		17.65		15.17	16.48	21.49	29.04	15.49	24.74	17.57	15.52	25.64	16.63	20.44	16.74
		17.42		12.4	17.28	17.14	15.93	14.2	19.65	19.35	15.29	21	18.09	20.23	16.27
		20.21		15.93	18.73	22.81	17.1	22.41	19.89	21.02	14.99	16.54	18.52	18.41	17.46
		21.05		14.93	17.15	21.42	19.95	17.31	29.88	16.43	17.14	20.38	16.79	18.3	18.72
		16.2		13.76	17.35	16.37	21.72	18.62	19.16	18.45	14.35	23.99	21.02	26.05	17.65
		27.93		20.22	16.41	18.53	18.37	13.61	18	18.79	12.3	17.71	24.42	21.53	15.81
		18.5		15.06	18.83	23.28	16.97	18.79	23.9	20.1	13.95	19.47	15.6	19.64	15.58
		17.6		15.89	21.1	19.88	20.7	17.06	24.31	18.08	13.74	21.69	18.11	17.33	19.11
		16.61		17.3	15.61	19.64	17.61	14.21	41.58	19.68	12.01	22.37	18.92	19.49	16.77
		18.33		12.09	17.3	19.05	18.9	19.31		20.72	17.49	18.62	20.69	17.84	19.4
		14.5		17.51	20.86	15.49	17.92	16.53	40.25	22.88	16.75	17.8	22.2	17.17	16.17
		15.1		17.85	15.07	19.28	19.16	17.03	19.83	16.33	15.86	21.34	15.55	20.26	16.02
		23.69		15.67	16.07	19.45	18.86	16.3	16.46	17.89	16.51	21.19	18.69	18.15	23
		14.42		16.5	14.27	17.98	18.12	17.16	18.82	17.5	12.84	22.13	18.86	18.92	20.51
		28.7		12.78	18.01	21.57	24.42	21.63	17.89	16.9	17.91	17.23	19.1	17.17	16.8
		30.12		15.39	16.6	18.78	27.77	20.42	17.83	21.09	15.53	18.32	20	18.13	16.61
		18.44		17.67	20.2	16.89	21.3	19.68	17.63	20.53	16.6	17.2	19.34	21.76	18.52
		23.08		21.81	15.93	16.6	18.45	18.92	18.85	17.57	11.33	19.94	16.96	19	19.1
		18.03		12.76	14.97	22.73	20.73	15.42	26.99	25.42	14.69	15.96	15.4	24.3	19.11
		24.07		14.92	14.15	18.19	19.75	16.7	14.14	20.23	10.76	19.36	17.32	20.07	17.93
				13.26	16.57	17.59	22.19	18.22	15.74	18.73	16.05	20.78	14.15	19.15	18.38
				19.53	19.14	17.41	20.25	18.65	15.2	19.11	15.73	18.23	17.67	16.43	20.61
				12.62	17.37	21.99	23.86	18.71	15.99	18.23	16.19	15.13	15.27	19.67	17.56
				19.71	19.44	18.98	20.03	14.88	14.47	15.44	11.88	21.67	16.65	17.33	20.47
				11.76	17.63	22.68	26.37	14.35	15.92	17.32	14.5	19.06	18.27	13.55	17.08
				18.96	21.25	18.26	19.53	16.36	12.96	17.34	13.15	17.37	13.03	20.6	19.39
				15.68	18.68	17.04		15.51	17.97	20.16	14.26	18.71	18.18	18.44	17.63
				15.78	19.44	17.4		17.49	17.4	23.25	14.56	18.86	20.08	23.34	20.21
				13.7	18.5	18.6		15.95	16.19	15.39	15.33	16.03	19.46	23.19	19.32
				17.75	19.43	18.04		15.48	14.74	17.27	15.69	12.53	14.29	14.76	19.08
				16.28	20.7	20.33		13.49	15.79	15.83	13.58	20.29	13.14	18.61	16.77
				14.56		18.37		16.99	18.51	16.33	15.52	15.01	12.55	12.91	24.11
				14.46	19.5	20.63		18.44	22.15	21.32	15.54	10.95	17.97	13.92	17.11
				16.03	18.66	28.07		18.32	14.93	13.39	16.51	12.31	18.53	18.68	18.44
				13.92	18.41	21.27		17.65	16.13	19.83	15.91	17.4	15.08	15.53	20.43
				16.39	20.56	18.52		15.67	18.24	12.98	16.5	18.58	18.26	24.2	17.41
				14.36	23.86	23.32		18.21	17.07	24.33	15.57	21.21	13.26	13.57	20.4
				17.88	24.76	20.7		14.68	15.9	15.66	17.16	13.13	16.78	17.27	18.7
				18.42	25.43	22.97		14.06	18.21	17.97	16	16.38	15.32	16.37	16.86
				16.19	16.89			17.28	13.93	18.99	15.45	15.92	17.09	27.36	20.52
				14.99	17.78	18.45		19.86	15.88	19.23	16.6	15.52	18.41	21.75	15.98
				15.48	16.64	16.64		13.95	18.58	16.98	17.75	16.24	16.09	15.86	19.11
				14.76	16.78	16.25		17.94	14.88	14.46	16.92	19.16	18.16	20.74	17.15
				14.54	14.31	16.08		15.74	16.08	14.97	14.58	14.53	16.49	15.61	20.97
				19.14	20.9	23.4		16.85	16.12	16.93	15.01	14.63	15.68	17.9	17.73
				20.22	15.87	17.42		16.35	16.06	18.44	18.04	21.8	16.99	16.96	18.95
				19.43	21.12	16.82		21.51	12.68	19.13	15.34	16.69	14.91	24.64	20.59
				15.26	17.5	18.85		16.58	15.84	17.15	17.87	19.06	16.26	17.62	16.73
				14.34	19.41	14.48		21.28	12.21	19.95	17	20.13	18.12	23.77	18
				14.26	16.94	29.36		16.05	17.27	21.59	17.15	19.84	16.28	19.93	18.41
				17.73	18.94	18.95		14.51	13.65	16.24	16.88	17.89	16.99	25.93	16.19
				15.19	24.29	18.86		14.53	14.91	20.37	12.24	18.42	16.47	19.04	17.51
				15.17	15.13	14.06		14.5	16.75	18.01	11.92	21.84	13.07	18.22	19.89
				13.45	18.89	15.87		20.37	14.14	20.25	14.23	22.56	17.09	17.15	21.32
				13.73	17.34	12.92		20.86	17.8	18.71	13.48	20.08	16.53	24.86	20.97
				17.51	19.61	15.26		15.69	14.91	21.15	17.62	23.06	19.16	21.41	17.24
				19.42	20.66	14.35		13.45	13	25.27	14.59	19.36	16.31	16.55	17.82
				15.68	21.2	19.19		22.65	20.24	26.43	23.32	17.97	14.35	18.47	15.05
				11.82	19.6	15.71		17.79	15.19	21.28	13.01	18.89	17.12	16.8	20.96
				11.93	19.58	17.08		19.62	18.58	24.32	12.21	18.59	14.75	22.67	19.41
				16.83	21.12	17.7		12.62	16.55	22.77	17.38	21.57	16.34	23.37	19.12
				16.96	16.62	15.17		14.33	17.75	23.45	11.13	20.28	19.12	18.6	18.02
				14.08	21.2	16.15		20.51	16.64		14.39	19.04	13.68	21.1	16.68
				11.87	18.44	18.91		14.03	16.53	22.18	14.01	17.99	17.78	16.39	18.29
				11.75	18.8	17.15		18.89	18.96	18.04	14.4	19.97	16.58	16.6	17.02
				16.29	17.07	18.66		18.06	15.77	17.65	16.17	19.09	18.83	20.89	17.47
				14.95	18.81	22.3		16.07	15.99	19.46	12.31	17.43	16.43	21.09	16.19
				10.85	20.02	15.58		18.44	16.71	17.33	14.12	17.68	17.37	17.35	17.15
				15.41	18.71	15.48		18.35	16.72	15.72	15.59	17.82	20.5	27.33	16.74
				12.36	18.93	19.68		20.08	15.14	20.08	14.25	16.61	16.16	17.8	18.33
				14.42	18.08	14.32		22.28	16.28	25.45	13.38	16.15	16.09	18.47	17.29
				13.25	16.81	15.63		20.33	16.98	20.06	12.66	21.22	15.96	26.11	17.21
				17.56	18.05	21.43		17.46	17.45	14.68	14.24	16.91	20.84	18.39	17.77
				13.96	20.32	17.4		31.26	18.38	16.39	11.74	20.36	18.58	18.6	18.34
				12.25	18.5	22.27		24.4	17.35	14.47	12.32	16.31	19.24	21.24	16.42
				14.48	16.8	15.74		22.88	17.53	17.62	19.21	18.14	17.76	15.01	16.39
				12.66	18.17	17.49		22.07	15.46	20.46	14.83	24.99	21.06	17.95	17.71
				16.34	21.86	17.37		22.27	16.36	15.81	14.15	18.36	17.82	23.07	17.39
				14.91	19.64	12.25			13.75	14.55	13.34	13.32	15.58	22.66	15.79
				13.86	18.12	15.13		26.23	16.94	15.84	16.65	19.23	21.54	21.59	17.64
				15.05	23.11	16.15		20.39	20.95	18.86	13.63	15.28	18.05	18.33	15.25
				15.25	16.05	16.88		22.05	14.8	21.17	14.82	20.9	21.51	16.6	18.43
				13.96	21.55	13.7		23.84	17.27	19.13	14.07	24.64	16.99	18.11	16.07
				14.76	21.67	14.43		26.87	21.53	19.13	12.72	16.31	15.21	33.54	16.87
				15.54	19.8	16.77		23.53	15.95	18.43	16.23	20.71	19.02	23.97	16.77
				12.74	16.84	17.76		16.38	18.21	15.26	11.99	24.1	16.05	23.01	19.75
				14.02	20.27	20.81		26.61	16.51	18.87	13.29	17.17	21.85	19.2	15.34
				19.1	21.25	14.65		17.92	17.8	17.25	14.36	19.11	15.19	22.34	17.09
				16.72	20.05	15.01		18.24	16.72	16.5	18.5	20.15	13.55	19.69	15.32
				12.74	18.15	17.05		14.31	19.38	18.76	12.99	24.09	16.52	21.36	14.62
				14.01	20.57	14.06		19.86	17.97	17.7	13.87	21.97	15.29	18.96	16.23
				14.84	18.97	20.99		19.29	20.89	16.15	15.59	21.81	19.59	18.89	14.84
				15.85	21.13	13.34		18.98	16.18	16.24	14.49	26.91	15.77	21.85	18.77
				19.23	20.24	15.75		17.89	15.63	16.76	17.07	21.81	14.68	17.76	14.59
				14.97	20.93	21.73		15.45	19.65	17.39	16.68	22.71	23.65	37.63	23.15
				16.43	22.99	25.24		18.18	17.33	20.69	16.5	25.1	17.19	25.22	21.26
				14.43	20.02	18.62		20.69	22.5	17.17	17.09		16.66	20.81	21.42
				13.64	21.39	19.13		17.88	14.47	18.32	17.9	25.65	17.88	24.37	19.93
				16.58	21.73	13.21		18.49	22.45	16.11	19.69	19.7	16.32	19.11	22.51
				16.74	22.42	21.3		21.38	20.63	20.25	21.36	23.65	17.67	21.94	18.63
				18.22	21.41	19.42		17.41	13.55	18.74	20	28.9	19.89	26.62	14.6
				14.75	20.78	15.45		17.32	17.32	19.89	19.78	20.8	19.18		19.89
				18.74	21.83	13.91		18.49	20.92	18.46	14.6	17.36	23.09	32.91	17.82
				18.52	18.49	20.27		18.39	20.57	18	18.55	28.61	17.44	23.78	27.88
				13.74	20.29	16.78		16.45	20.48	18.84	15.25	23.13	16.85	22.71	16.25
				16.73	18.8	17.69		16.4	14.62	16.18	16.87	16.44	20.89	21.23	21.9
				14.32	17.52	13.69		20.75	25.55	14.33	19.72	17.9		21.15	16.78
				16.39	14.83	17.58		18.01	17.06	17.31	16.17	20.09	21.27	22.85
				16.17	18.62	16.74		20.21	21.19	18.2	15.17	16.33	19.6	20.29	18.17
				19.96	17.06	14.29		16.15	15.43	20.28	12.94	15.66	17.9	22.34	20.65
				15.05	17.2	18.67		17.09	23.31	20.84	16.35	13.91	16.02	23.01	20.06
				18.89	18.75	17.59		18.4	15.9	16.69	12.9	16.74	16.02	18.95	27.31
				15.03	18.34	18.82		18.27	20.39	17.85	18.16	17.24	17.08	20.28	32.81
				17.99	17.36	18.72		16.14	19.2	16.78	18.59	18.43	18.92	21.14	17.49
				11.33	20.34	18.65		15.94	18.53	20.17	22.86	14	18.19	21.71	14.12
				17.75	20.75	11.4		16.59	12.7	18.84	15.72	18.7	25.63	18.28	19
				14.16	18.28	16.19		17.59	11.98	16.76	14.31	15.83	16.21	19.05	17.21
				19.93	14.91	16.92		15.25	16.73	22.33	14.7	12.83	15.02	17.84	19.13
				10.38	15.71	16.12		17.64	13.33	21.48	15.69	14.21	15.94	19.96	17.1
				9.86	15.48	18.2		16.11	27.85	16.74	20.92	23.58	16.47	20.09	15.08
				16.99	15.55	12.97		11.49	19.15	19.15	16.68	16.89	16.9	17.58	15.84
				16.95	16.93	16.23		15.8	22.16	20.57	19.04	18.29	13.21	18.99	21.47
				13.09	15.71	10.97		16.54	17.27	17.79	17.16	19.16	21.92	19.79	17.68
				18.66	18.01	20.49		12.09	18.72	19.45	22.81	14.46	16.03	21.93	17.75
				15.77	18.4	19.95		16.01	10.63	16.6	25.21	17.21	14.05	17.11	15.24
				16.76	16.3	10.1		11.74	13.09	15.06	21.46	17.59	15.03	18.62	13.32
				23.34	15.28	17.51		15.61	11.03	18.94	17.15	17.52	15.23	20.68	22.2
				12.7	15.67	18.82		14.42	18.19	21.45	15.41	16.12	13.96	22.99	16.84
				17.64	18.82	20.34		16.68	15.91	16.59	18.21	15.69	15.03	23.36	15.6
				17.26	15.31	17.34		17.1	12.32	16.98	19.83	24.27	20.06	14.92	15.67
				15	18.56	10.75		13.91	26.24	21.06	17.81	20.93	16.7	20.38	15.16
				17.62	22.24	11.97		14.78	17.01	19.82	18.1	17.2	13.37	14.94	17.58
				16.42	19.56	13.71		18.12	16.27	18.42	16.46	15.89	12.7	20.51	14
				17.54	16.79	15.24		14.91	20.77	17.03	18.29	20.44	16.27	18.11	15.46
				23.17	18.73	20.34		17.28	11.69	16.58	13.81	20.36	14.81	25.1	18.61
				18.61	15.37	18.04		12.83	16.26	25.06	20.33	22.23	15.34	16.71	16.04
				16.73	19.23	20.79		13.48	14.95	16.58	13.27	15.49	21.23	22.01	16.8
				14.69	16.03	15.5		16.25	15.23	20.91	16.24	15.72	15.2	21.87	17
				15.57	19.32	18.52		13.96	13.11	19.87	14.38	17.44	14.16	21.94	12.72
				15.86	18.42	23.85		14.85	10.9	18.52	16.7	16.73	19.16	20.49	12.71
				17.19	17.48	17.12		15.36	13.59	18.94	16.04	20.29	16.95	21.69	15.86
				17.21	24.2	23.1		20.3	14.36	15	16.9	20.47	16.41	19.73	16.37
				19.03	20.17	18.34		17.01	14.29	17.35	14.6	21.15	16.83	20.99	16.99
				14.79	19.62	21.86		16.45	12.97	14.94	13.27	13.64	14.31	22.39	15.19
				21.96	21.47	21.07		15.09	13.78	22.72	12.24	22.35	19.3	18.65	16.71
				16.85	18.86	18.08		14.92	18.45	17.39	14.35	12.39	18.08	18.36	20.89
				17.15	21.1	19.01		21.83	13.23	17.81	18.61	13.29	17.17	17.05	13.25
				16.96	18.44	18.72		17.08	14.04	19.17	16.81	17.26	20.14	18.88	15.37
				19.74	21.2	18.96		16.18	19.93	15.17	16.37	25.61	14.88	18.93	14.02
				16.01	16.77	20.41		16.89	15.15	20.6	17.35	13.74	23.02	19.8	16.37
				17.73	17.82	15.57		19.45	13.09	14.53	12.4	19.22	18.17	17.52	16.21
				17.13	18.09	16.49		19.03	13.8	18.79	14.5	17.65	13.99	18.02	15.61
				16.17	19.55	19.38		18.46	16.44	18.34	15.24	15.69	14.38	25.08	17.85
				23.19	26.7	18.01		14.42	14.67	20.35	13.62	20.24	20.11	18.29	16.11
				18.59	17.8	16.96		16.24	17.53	14.58	17.33	20.08	18.09	19.79	16.49
				20.85	16.14	14.86		17.43	16.22	20.51	13.59	16.15	15.33	17.51	14.72
				16.56	20.33	16.7		16.78	19.22	17.37	16.05	18.18	19.02	17.24	15.61
					15.18	16.08		12.86	19.57	18.21	15.82	20.36	14.6	14.08	19.39
				17.1	18.61	17.8		15.73	14.18	16.14	16.93	19.77	25.83	15.75	12.71
				19.11	17.88	16.7		11.9	24.76	16.26	15.21	22.55	13.97	16.99	14.54
				19.06	16.46	16.83		13.53	19.2	16.64	14.68	20.1	14.26	16.37	16.3
				12.4	23.9	23.05		16.61	21.03	15.62	15.41	17.25	18.49	16.41	14.8
				12.16	18.39	19.69		16.34	22.18	16.68	16.33	17.22	15.36	14.38	16.2
				15.63	15.09	16.25		11.57	23.84	16.88	22.41	23.56	14.7	17.34	14.92
				27.67	14.22	15.63		14.73	17.5	15.5	16.3	18.45	18.69	16.93	16.94
				15.22	21.6	20.42		17.85	18.06	16.46	17.19	19	15.35	23.26	16.01
				22.5	23.11	16.51		18.91	18.22	18.08	18	20.59	18.23	16.16	16.34
				11.21	21.25	18.98		15.93	19.06	16.36	15.51	16.62	20.52	15.89	17.23
				13.32	20.57	18.45		14.9	17.58	14.67	19.19	17.41	14.66	15.62	19
				11.04	23.46	19		14.06	19.73	14.31	17.35	20.18	14.86	17.91	16.26
				14.78	17.57	23.3		13.9	19.45	14.75	18.1	18.51	16.77	15.7	15.88
				15.26	19.67	19.63		15.8	19.12	18.15	17.61	16.09	20.62	15.19	18.43
				14.03	17.34	16.15		14.87	23.7	18.67	18.79	18.53	19.67	16.05	17.15
				20.75		19.45		15.81	20.3	18.71		16.11	16.75	21.89	15.59
				18.93	23.25	16.12		13.83		15.59	17.01	15.59	16.02	15.71	16.97
				16.26	19.39	17.71		15.61	22.18	14.7	18.08	18.13	14.12	15.59	18.17
				16.11	25.55	20.31		18.05	22.29	16.05	17.41	16.56	23.05	16.1	22.48
				16.92	23.79	16.4		13.7	22.91	16.05	13.95	13.51	15.99	20.93	17.45
				14.81	24.32	20.32		15.71	23.71	16.35	12.6	16.36	17.7	16.01	23.15
				17.19	16.58	18.77		17.27	24.89	16.46	15.53	18.21	15.8	19.99	15.99
				20.17	20.83	20.21		15.21	28.61	14.06	19.78	15.61	17.42	17.45	20.34
				20.47	14.59	15.4		18.66	19.54	16.95	20.39	16.06	18.14	17.03	18.56
				15.07	23.25	19.96		18.1	24.18	14.37	12.9	16.47	21.04	16.85	17.75
				20.45	22.38	21.97		14.2	21.02	16.48	18.42	16.66	17.43	16.76	15.87
				16.66	19.12	16.88		12.96	19.21	15.29	13.06	12.62	17.01	19.12	16.67
				14.29	13.65	22.93		17.49	20.99	19.31	12.11	13.16	14.19	24.46	16.74
				14.95	19.79	23.04		17.21	26.71	17.62	11.46	17.23	15.19	18.09	17.05
				15.97	16.08	18.92		14.52	19.94	13.37	17.55	16.23	15.69	20.55	20.14
				15.07	15.94	18.81		17.23	23.5	16.46	14.2	14.53	13.12	18.66	20.09
				16.78	14.17	20.66		15.57	34.85	17.85	13.29	15.35	13.56	20.46	18.63
				17.01	15.67	22.67		18.41	21.18	15.54	11.52	13.51	15.87	18.43	16.09
				14.39	15.92	18.1		19.39	24.89	12.86	14.82	15.18	13.71	21.14	23.35
				14.29	20.04	23.33		11.3	20.39	17.86	12.03	13.82	14.08	19.51	17.07
				15.71	16.63	19.42		12.19	21.28	14.74	11.32	15.88	17.86	18.54	17.36
				21.96	15.99	21.23		16.82	23.34	17.96	11.69	24.14	18.03	18.87	17.39
				17.62	19.86			11.47	21.2	16.57	18.42	13.73	15.39	22.05	17.88
				15.87	17.7	35.06		19.42	22.21	14.13	14.26	15.71	15.03	17.94	15.77
				14.5	22.37	23.53		19.18	22.32	17.92	14.32	17.92	15.75	18.09	16.27
				18.95	19.24	21.2		19.15	19.28	20.07	10.97	18.64	18.93	18.72	18.55
				15.41	17.54	20.97		18.24	23.53	16.15	14.17	16.59	15.87	19.49	24.27
				16.48	18.21	27.32		18.85	20.58	14.35	16.11	13.87	13.73	19.25	17.37
				14.79	19.22	20.33		11.49	20.43	19.77	14.96	17.3	13.05	20.32	18.04
				14.66	17.84	27.28		16.44	20.16	26.98	18.47	17.9	16.97	19.27	15.42
				18.42	22.05	18.74		18.04	24.4	17.45	11.01	11.87	16.14	22.91	18.39
				18.84	16.81	17.49		13.93	17.8	17.66	14.37	15.29	18.57	19.78	14.44
				14.27	19.32	17.54		17.27	20.52	17.42	13.57	15.11	14.46	19.5	17.66
				14.2	22.7	23.17		15.67	20.19	20.68	9.64	13.02	17.68	29.12	20.73
				14	18.5	27.07		13.12	18.16	16.71	16.02	14.8	17.1	19.38	19.66
				14.99	20.18	20.4		17.97	20.51	15.43	16.15	11.28	13.24	21.31	13.41
				18.06	21.26	16.72		21.12	22.84	16.64	13.15	15.41	15.34	19.25	16.63
				14.76	17.52	18.84		13.15	17.54	18.65	14.85	18.61	14.53	21.78	12.65
				17.26	20.19	20.18		15.93	18.65	13.78	17.3	15.7	18.33	20.71	16.11
				13.95	16.51	21.21		18	17.43	20.61	16.39	20.89	14.7	21.47	14.78
				15.11	17.1	21.43		16.01	18.54	18.15	14.19	11.71	14.81	20.25	13.32
				21.43	17.5	16.88		14.52	17.32	17.96	10.68	12.74	14.8	24.38	22.22
				13.95	28.81	19.19		18.36	18.88	18.82	14.28	14.48	14.08	21.9	22.35
				12.46	16.87	15.46		19.54	18.85	16.91	14.5	15.78	17.4	22.87	17.55
				20.33	19.87	15.43		14.84	22.02	21.22	12.67	16.5	13.19	27.89	17.16
				13.03	18.74	19.8		14.53	30.66	19.89	13.6	17.52	17.43	19.82	16.65
				15.96	18.42	26.34		13.86	18.77	15.75	14.02	17.71	13.64	18.48	16.65
				16.05	18.46	23.48		16.34	18.34	22.17	14.06	14.72	13.43	20.37	25.31
				15.6	14.41	18.09		16.1	17.05	22.07	16.82	13.54	14.39	20.83	20.84
				14.31	15.41	17.24		18.09	17.84	23.02	13.97	15.31	14.56	19.15	19.92
				17.06	15.2	18.85		13.34	19.11	18.43	15.42	17.74	15.7	27.27	20.21
				12.87	15.51	19.76		17.2	17.79		14.61	17.46	15.71	21.68	17.64
				19.45	21.73	22.19		14.46	17.26	25.49	15.07	13.67	14.31	29.22	16.02
				15.71	15.62	16.42		18.6	21.54	21.91	14.32	18.5	13.95	21.33	23.13
				18.39	18.54	17.95		16.02	22.28	22.63	17.13	14.77	15.8	24.73	20.41
				15.98	15.43	20.03		16.06	18.77	23.59	23.26	20.2	13.5	25.33	19.41
				18.22	16.76	14.55		14.91	18.68	19.06	13.51	15.19	14.44	40.15	17.64
				13.2	15.32	16.18		16.6	19.57	23.59	17	15.38	13.14		18.78
				13.66	12.66	19.36		13.03	19.77	21.79	16.81	16.43	15.44	23.97	20.58
				15.78	14.35	16.79		14.76	19.85	19.21	14.7	16.79	17.71	19.76	23.75
				15.57	14.91	16.92		16.33	18.33	16.18	16.65	15.92	14.69	23.64	19.34
				16.03	13.84	20.47		15.74	25.75	21.44	14.98	17.72	14.29	24.1	21.94
				14.65	15.46	22.34		14.05	18.09	18.64	15.69	15.37	14.63	22.11	20.71
				14.31	15.85	21.99		15.13	20.43	15.76	30.63	17.06	14.87	20.14	28.28
				13.34	15.87	15.74		17.45	20.44	17.61	15.86	17.36	14.63	18.39	20.03
				16.75	19.34	16.67		18.15	18.86	19.08	15.92	17.52	23.32	17.32	20.58
				17.56	17.95	17.58		15.82	19.98	16.8	17.87	19.6	17.34	17.89	20.26
				16.69	16.83	19.87		15.41	21.16	17.13	14.24	19.58	15.39	22.48	21.91
				17.46	15.94	15.38		14.8	20.01	20.08	15.64	18.59	16.75	18.76	24.08
				22.01	15.59	16.27		16.82	21.23	18.94	16.86	16.64	14.24	20.34	16.56
				15.58	14.85	20.82		18.86	23.17	15.71	17.17	20.73	15.48	17.37	16.72
				12.76	16.36	18.3		18.79	19.83	17.2	15.29	21.11	15.25	15.15	22.18
				19.07	15.81	17.16		22.16	23.16	16.65	15.23	20.83	15.96	15.53	25.99
				16.12	14.78	18.59		18.21	22.3	15.17	17.14	28.95	15.51	20.95	20.07
				14.25	19.54	19.94		17.47	20.59	17.3	21.18	19.02	18.04	18.16	17.6
				14.81	17.77	22		18.53	21.13	17.56	16.43	28.01	19.75	21.72	16.29
				12.62	15.84	14.65		16.05	22.52	16.81	14.8	18.78	21.22	17.06	23.29
				18.14	16.85	15.91		20.95	22.03	17.54	17.66	21.12	14.02	21.52	21.36
				18.33	14.13	18.05			21.31	16.35	18.54		16.43	20.55	28.13
				17.55	16.05	17.28		22.62	25.87	15.34	18.16	21.78	18.42	19.62	19.59
				14.51	16.5	15.33		19.07	22.02	15.55	16.15	21.79	20.47	18.01	24.75
				18.22	13.18	14.64		19.17	20.46	16.55	18.81	22.73	17.62	17.38	29.18
				17.54	16.2	16.73		17.79	21.65	16.12	27.15	23.53	14.53	18.1	27.93
				28.85	16.35	18.38		18.89	23.11	15.25	21.4	28.2	11.85	20.95
				22.62	20.87	16.1		21.16	22.05	16.42	21.69	23.83	19.3	19.87	21.36
				18.9	13.99	19.01		24.7	21.11	16.11	19.7	17.96	15.88	19.47	22.04
				16.41	14.38	15.31		14.98	22.36	14.31	16.88	16.99	10.55	23.19	22.29
				21.82	15.93	14.87		20.2	19.44	15.63	15.92	21.39	10.86	21.78	22.89
				15.88	14.74	12.78		14.13	23.22	17.78	15.08	19.12	19.4	19.26	28.75
				18.13	15.13	20.86		20.04	20.5	14.09	16.19	26.52	11.4	20.15	29.35
				19.36	15.94	15.73		18.34	18.63	12.88	15.23	16.79	14.69	18.64	17.07
				17.05	11.35	20.59		17.07	22.32	14.06	14.07	16.28	19.51	17.84	18.45
				20.49	14.75	18.86		14.24	21.68	16.87	24.18	18.88	13.49	19.25	18.18
				18.21	17.7	15.88		18.29	18.88	16.2	20.58	17.24	15.55	19.54	18.85
				17.85	15.38	17.87		18.06	21.25	17.45	16.2	21.12	16.63	17.04	20.62
				19.29	19.05	18.72		14.57	17.69	14.35	21.11	18.65	18.15	19.16	21.65
				16.91	13.11	13.2		15.84	21.24	15.83	14.85	22.81	19.86	19.8	16.36
				17.93	19.58	12.8		21.78	25.07	14.48	14.98	14.83	18.31	21.35	19.55
				19.89	11.42	17.12		18.59	17.37	13.71	19.51	15.48	13.27	14.96	17.83
				15.05	11.3	13.08		16.72	21.86	17.09	16.5	19.36	13.99	22.97	20.95
				15.88	16.36	19.61		12.75	22.11	15.48	14.1	16.32	14.79	17.63	19.07
				13.41	14.41	16.07		17.27	24.64	14.7	19.38	21.85	13.03	22.43	23.5
				17.74	16.7	19.65		20.06	16.9	16.02	15.34	16.86	16.82	18.94	17.82
				13.61	18.96	15.62		22.52	22.92	12.81	17.04	22.46	18.48	14.26	23.29
				13.8	17.45	19.52		14.65	21.75	17.35	14.24	22.67	19.97	19.36	15.61
				15.91	18.2	19.27		17.39	21.62	17.75	14.86	16.44	14.57	19.23	24.88
				20.39	20.57	19.09		16.63	20.14	15.18	14.24	21.11	22.69	17.33	20.48
				15.33	14.12	17.76		18.17	22.7	15.9	15.23	21.45	19.03	24.96	20.17
				13.24	16.78	15.86		15.76	22.41	14.65	15.91	20.34	19.65	20	18.71
				17.67	23.87	21.23		17.38	20.77	15.61	23.35	21.13	21.77	16.48	19.78
				14.89	16.74	22.69		16.61	25.85	16.05	18.24	15.65	22.77	21.01	25.61
				13.82	18.01	14.49		22.23	21.35	13.97	16.31	15.8	19.12	23.36	24.19
				14.41	19.16	17.88		17.39	24.52	16.75	20.6	18.74		20.51	26.34
				15.69	21.28	17.3		16.8	21.57	15.82	19.11	15.99	27.51	16.79	23.71
				12.68	23.49	20.99		16.47	30.38	15.31	16.05	23.04	21.66	20.48	23.88
				13.65	20.84	19.54		19.95	24.33	13.76	17.07	24.06	24.17	20.12	19.94
				12.59	16.79	16.22		19.77		16.58	15.54	18.39	20.41	21.87	25.76
				13.1	16.91	20.07		16.49	23.23	15.09	16.89	19.26	22.18	19.11	25.85
				14.59	20.79	15.35		16.59	21.61	15.37	16.18	21.05	15.65	22.01	17.29
				16.16	18.92	19.46		16.37	19.11	14.96	13.3	16.86	15.25	21.34	23.03
				22.11	20.08	21.62		16.09	20.56	16.65	14.12	21.89	18.98	28.66	18.61
				16.39	17.71	17.22		18.96	20.43	14.4	19.29	17.11	23.41	22.01	24.59
				12.52	18.24	14.02		16.32	15.35	13.5	12.65	18.88	20.49	18.81	21.26
				13.86	17.44	19.08		14.99	14.58	16.5	17.72	24.16	19.18	22.96	21.28
				14.74	19.21	19.16		17.95	16.04	16.55	15.18	21.45	16.3	18.53	22.48
				14.6	20.44	17.93		16.3	18.26	16.88	17.43	19.4	13.6	20.51	16.97
				17.87	22.78	16.24		19.51	18.55	12.31	12.84	18.42	24.34	20.76	18.57
				12.78	20.58	14.39		18.07	19.65	12.78	14.34	19.65	14.73	15.57	20.28
				13.57	16.34	17.7		16.56	23.44	18.02	15.87	18.38	18.53	15.75	25.71
				15.09	16.35	19.19		19.37	16.55	13.88	17.23	20.86	13.46	16.05	19.57
				14.07	18.67	16.16		20.08	14.73	13.15	15.61	17.18	13.25	20.2	18.02
				13.18	17.42	16.88		16.17	20.64	19.12	14.01	19.41	19.85	22.27	19.5
				17.84	14.48	17.33		16.54	15.62	16.01	10.24	20.26	14.05	19.69	17.93
				17.1	17.8	18.51		18.87	19.74	17.93	13.55	21.77	15.14	17.46	22.26
				15.3	26.54	15.98		19.44	15.52	14.2	16.87	19.74	15.76	25.01	18.37
				19.29	20.58	17.32		16.78	15.79	14.15	11.95	23.35	17.79	21.57	19.11
				16.05	15.59	18.25		15.77	16.23	16.97	14.97	20.46	13.47	21.49	25.27
				15.33	21.27	18.84		17.96	17.72	17.13	12.12	19.08	16.51	18.33	17.27
				14.88	18.02	16.73		23.36	15.55	13.4	17.31	23.65	17.88	20.1	18.73
				22.78	16.81	17.08		16.62	14.38	12.78	13.61	17.98	13.2	20.46	17.03
				14.01	20.52	17.31		16.57	15.19	17.27	16.45	18.23	16.83	19.54	18.71
				17.51	13.18	16.56		17.54	15.1	13.71	14.62	15.31	15.39	18	18.52
				17.89	18.34	17.43		16.6	15.52	14.4	13.58	21.04	13.59	22.44	18.04
				16.18	18.31	17.98		21.05	16.22	18.43	17.88	18.79	17.88	26.36	23.13
				19.62	20.58	19.43		14.89	15.09	13.43	15.01	17.29	15.21	22.3	23.99
				16.27	13.91	17.22		14.63	25.75	20.12	14.64	19.69	15.76	18.36	15.63
				20.33	20.75	22.75		19.32	16.6	18.44	16.04	18.98	16.42	19.75	20.53
				16.1	22.04	15.98		18.99	14.22	17.37	14.64	15.84	19.24	19.83	17.4
				16.52	24.06	17.11		18.66	17.07	16.04	17.95	22.29	19.09	20.7	22.99
				17.57	17.78	16.59		19.73	16.56	15.92	14.68	16.03	14.7	17.82	15.57
				15.87	19.47	17.81		14.41	14.98	14.05	14.88	17.29	21.09	23.11	24.82
				16.13	25.39	17.69		15.53	13.7	14.84	15.03	13.58	17.06	19.72	23.02
				17.44	16.35	17.95		19.08	17.32	15.5	12.8	18.01	16.18	20.05	18.52
				21.55	25.92	16.65		17.93	22.15	16.03	17.18	12.97	16.26	17.84	21.84
				21.81		17.54		15.51	21.79	17.65	15.28	20.7	20.41	18.27	27.2
				18.26	19.82	15.84		16.59	15.25	18.07	17.42	23.4	15.86	21.6	18.17
				16.98	18.04	21.3		20.06	17.62	14.86	25.33	15.53	15.53	17.74	19.64
				21.02	27.32	28.1		16.17	14.06	12.67	13.72	18.38	17.07	18.15	19.56
					23.26	21.19		18.31	14.53	16.34	14.17	14.22	14.73	16.82	23.23
				29.9	17.97	16.87		18.17	19.46	16.48	16.71	15.98	17.4	29.31	17.66
				25.07	24.49	18.42		19.05	15.48	13.12	14.78	15.69	17.72	17.82	21.43
				21.32	22.68	21.24		17.19	20.28	17.73	12.45	22.25	16.22	16.83	21.62
				20.25	18.89	14.79		20.52	15.2	17.1	14.04	21.61	14.27	15.52	21.77
				24.26	18.61	17.2		19.01	17.18	13.62	18	17.5	15.8	19.43	19.79
				18.84	19.84	21.03		18.51	18.65	12.64	15.98	19.7	14.8	17.58	15.54
				20.97	16.03	20.59		16.95	19.78	16.07	22.33	19.24	17.31	17.88	17.77
				18.59	15.78	28.69		20.35	17.29	10.35	16.4	16.65	12.72	15.2	19.66
				17.05	21.88	18.2		20.47	17.8	10.4	14.46	26.72	12.41	15.66	16.04
				16.85	15.1	22.1		15.67	16.52	16.71	12.82	21.75	15.12	24.84	18.35
				20.74	17.16	21.37		15.41	16.73	15.13	12.57	15.39	16.3	14.17	19.53
				20.02	19.34			16.85	15.7	10.06	16.56	19.98	15.96	17.76	19.05
				20.33	16.96	29.69		18.67	16.57	17.75	17.57	20.03	15.22	18.54	19.39
				18.22	14.65	24.61		15.02	16.4	11.53	18.18	19.82	13.24	21.91	23.16
				17.31	15.35	24.07		17.72	18.54	14.25	14.97	18.82	12.12	16.82	19.12
				20.79	13.78	21.37		16.41	19.21	13.23	12.34	18.24	16.24	19.48	15.14
				17.32	17.24	21.84		17.36	14.15	18.74	13.84	19.93	17.5	16.96	14.98
				20.83	14.95	27.14		13.53	17.31	16.86	25.55	17.17	14.67	18.93	20.3
				19.03	15.73	39.42		15.78	14.93	16.62	11.95	22.91	14.87	15.15	19.04
				16.27	16.54	24.25		13.89	18.71	16.59	15.18	21.3	14.94	14.94	18.08
				20.05	18.75	21.35		16.26	14.78	20.57	19.29	19.96	13.66	15.73	21.61
				17.39	17.93	19.38		16.5	19.54	18.62	22.15	20.69	12.79	18.91	17.74
				15.83	12.39	24.27		17.94	16.33	16.06	16.97	28.63	16.68	16.17	16.74
				15.46	16.16	23.24		13.69	23.15	13.96	15.87	20.97	13.47	27.66	18
				23.39	15.78	19.79		13.7	15.78	19.8	14.7	20.74	21.4	17.45	19.1
				18.77	15.43	22.19		17.19	16.9	17.25	21.91	22.04	11.01	19.91	18.73
				14.83	15.81	24.98		14.01	14.83	17.43	14.14	25.95	13.96	23.87	22.22
				17.24	18.31	23.45		17	18.37	17.01	24.49	27.77	15.21	34.38	20.03
				17.55	12.57	21.25		16.17	16.91	14.92		22.52	14.56	20.34	15.07
				14.59	22.68	18.14		19.74	19.39	15.9	19.1	21.81	12.78	21.38	16.17
				19.73	13.93	20.39		18.01	19.48	22.44	17.21	20.04	21.32		17.78
				14.27	15.18	30.79		14.44	15.41	13.91	18.75	21.05	12.87	24.07	16.4
				13.82	18.24	15.28		15.13	22.6	15.53	19.86	22.23	23.66	19.62	18.62
				19.88	15.71	17.39		16.62	21.05	18.86	25.68	22.78	14.81	20.19	21.55
				15.55	17.4	20.5		15.61	16.01	15.5	19.84	19.4	17.91	20.35	15.04
				13.68	15.73	16.92		17.84	17.87	21.24	20.13	22.39	19.4	18.46	21.59
				18.54	14.97	22.46		15.08	21.79	13.82	16.76	19.9	13.69	20.36	20.37
				15.35	16.02	18.71		17.5	15.56	20.88	17.63	32.99	17.39	22.44	15.58
				13.98	17.14	16.06		21.14	22.57	15.41	16.39	24.55	18.3	15.98	22.21
				15.07	15.08	22.74		19.55	21.82	15.62	16.73	40.89	14.23	16.45	20.33
				16.93	19.89	17.85		18.7	17.4	16.66	15.14	30.67	17.7	18.62	28.5
				16.32	17.6	20.5		21.12	18.73	14.24	13.35	23.25	15.88	15.63	20.97
				15.59	16.19	20.47		19.81	15.85	19.82	17.94	24.87	23.63	20.43	19.93
				14.56	17.1	15.71		16.66	16.39	15.69	16.22		14.68	18.14	18.32
				15.02	22.09	18.79		18.43	21.98	19.03	15.68	18.99	18.83	17.87
				14	17.37	17.05		20.79	22.12	16.38	16.49	19.16	19.46	15.28	27.45
				15.38	15.85	20.36		21.68	17.53	20.95	15.9	19.44	16.69	18.11	24.68
				15.21	18.13	19.42		20.57	18.4	15.88	15.25	22.85	13.95	16.69	22.39
				18.24	16.91	19.08		21.37	18.7	16.47	17.35	19.74	16.92	16.65	20.93
				17.58	21.35	20.16		18.27	16.92	15.68	14.25	26.56	18.8	24.83	21.41
				12.64	16.92	20.43		21.23	26.5	18.37	14.7	19.14	17.21	15.08	30.05
				13.49	16.83	26.73		24.79	17.31	19.52	15.61	16.77	15.1	18.53	22.15
				18.33	17.82	18.99		23.27	19.06	17.87	14.82	24.42	17.65	17.05	28.5
				14.82	14.94	18.61		20.96	18.53	16.79	18.89	18.08	14.79	18.77	16.59
				15.76	15.09	19.5		22.77	17.78	17.99	15.99	16.17	17.57	16.62	21.44
				12.39	16.67	20.13		17.63	19.11	18.11	14	23.97	16.82	15.73	19.32
				17.24	16.91	20.6		18.6	26.75	17.45	13.93	22.43	13.81	16.23	20.57
				13.46	16.66	19.02		17.6	18.18	15.95	17.71	22.78	17.66	18	19.77
				13.66	19.45	22.07		18.57	18.64	20.45	13.57	18.3	15.5	17.37	20.26
				14.74	15.8	19.27		20.12	16.99	19.82	13.35	16.77	23.73	18.27	23.52
				15.25	17.27	18.97		18.11	20.8	16.05	12.82	18.69	15.78	16.9	17.07
				15.04	17.38	20.42		28.47	17.95	18.73	13.34	15.86	14.46	23.15	22.18
				16.54	17.53	22.28		24	18.09	25.4	15.64	15.18	19.42	18.36	19.26
				15.07	16.88	19.55		20.49	19.15	19.59	14.41	18.44	19.09	17.07	22.84
				14.56	14.9	18.73		22.09	19.92	20.72	16.14	21.04	15.5	16.4	17.23
				16.88	24.69	17.52		20.5	17.33	21.94	13.59	19.26	15.14	17.73	22.55
				13.45	14.78	20.81		16.19	17.45	20.64	12.67	24.47	15.03	20.43	19.11
				19.99	18.88	22.77		17.03	18.16	21.88	12.77	21.68	19.49	20.08	17.82
				17.37	16.86	18.35		24.27	17.1	18.66	16.69	16.48	17.3	19.26	20
				16.46	15.18	16.77			17.8	18.75	13.68	19.62	16.29	17.77	17.15
				16.38	16.26	27.68		23.79	19.22		13.9	22.54	18.83	16.08	22.51
				15.99	15.24	22.86		21.22	22.91	17.81	13.8	19.52	16.99	15.88	15.84
				17.61	18.07	19.75		22.06	19.73	15.83	14.74	18.58	19.89	15.72	20.93
				20.62	21.16	20.65		24.14	21.94	18.96	13.22	21.77	17.94	17.55	20.76
				15.08	18.09	20.94		23.36	17.52	24.06	12.28	18.39	15.51	22.93	18.57
				16.88	14.85	17.82		25.62	18.79	19.22	12.87	24.03	18.39	18.08	18.04
				14.77	15.71	16.36		16.32	21.97	18.86	18.44	24.5	15.29	18.71	18.28
				19.68	15.14	17.28		17.07	19.78	17.43	14.52	23.15	16.53	21.08	17.21
				19.99	15.43	20.34		19.42	18.57	15.56	16.32	20.32	17.6	20.07	18.65
				17.6	15.15	23.86		20.17	18.45	19.29	16.12	18.58	16.43	17.1	15.64
				18.57	15.64	22.25		18.17	17.86	14.13	15.21	24.68	15.25	21.66	18.71
				15.59	19.31	18		23.63	18.75	17.5	13.74	21.78	13.74	14.7	20.43
				18.82	19.35	21.52		19.46	19.2	18.51	14.51	20.01	22.82	17.6	19.12
				17.49	16.2	25.96		16.34	16.44	17.42	14.6	19.71	21.72	19.08	20.31
				15.83	13.39	21.01		17.93	17.32	19.7	14.86	22.03	20.4	22.88	15.62
				17.38	17.22	15.86		16.48	22.79	15.46	16.46	21.38	18.05	15.74	15.18
				16.83	23.11	24.67		13.69	19.72	13.14	15.72	22.24	21.44	18.48	16.71
				18.98	17.4	21.65		14	17.48	14.59	17.59	20.57	14.86	18.43	21.89
				18.04	17.43	17.28		17.12	20.48	13.04	15.19	18.83	16.98	14.96	17.53
				15.97	15.42	22.35		17.93	15.84	14.05	16.24	22.42	14.52	15.76	15.24
				24.45	10.87	19.68		16.45	17.25	14.32	15.11	21.2	22.13	20.89	18.7
				20.38	11.64	16.06		14.97	16.17	15.5	13.53	25.31	16.07	19.98	15.58
				16.6	17.98	20.22		13.51	22.26	19.88	17.27	17.26	15.59	20.34	21.11
				15.34	15.63	24.42		19.42	17.02	17.04	16.53	18.54	16.47	15.37	14.57
				17.79	13.79	17.11		14.91	18.18	17.5	14.48	19.43	17.88	15.25	15.3
				14.85	15.84	18.41		14.49	15.26	16.29	16.33	18.49	14.12	20.97	15.67
				20.39	12.41	15.02		21.93	14.89	15.93	16.22	16.89	22.05	17.17	16.23
				19.52	17.3	15.84		16.06	14.72	15.7	14.86	19	24.39	22.3	17.04
				14.69	18.55	18.82		16.58	19.33	17.8	16.22	16.54	19.5	15.48	20.72
				16.15	15.67	15.72		14.28	16.16	18.87	15.92	22.39	17.97	15.76	15.97
				14.08	17.5	17.96		18.98	16.73	17	13.91	16.49	17.93	16.5	17.21
				19.52	18.43	21.76		16.89	17.15	19.23	15.55	16.58	21.6	14.79	18.71
				16.58	18.67	21.64		16.09	15.61	16.06	17.56	20.31	16.75	13.63	21.25
				16.96	15.17	14.48		16.59	19.02	23.4	20.25	20.33	14.85	17.21	16.81
				16.35	15.93	17.36		14.3	17.4	16.44	13.42	18.08	14.4	15.87	16.21
				17.81	15.1	14.91		20.03	18.53	17.11	15.51	18.96	19.72	20.88	19.13
				14.57	16	17.25		14.93	19.82	18.46	16.74	16.22	22.2	13.65	16.48
				20.7	17.5	22.14		15.4	24.33	16.26	13.45	18.07	13.48	17.37	23.11
				17.81	13.74	15.69		16.69	17.01	16.06	13.75	21.26	15.8	14.62	15.64
				16.99	27.8	16.16		18.68	18.82	15.8	15.66	20.34	18.45	15.92	16.93
				20.57	14.36	15.71		14.56	17.07	15.21	16.14	19.96	24.47	16.07	17.28
				15.66	20.26	15.9		15.86		16.88	13.97	20.05	28.96	15.45	14.93
				19.92	13.92	14.15		13.59		19.28	12.42	16.87	15.3	19.39	14.98
				16.29	25.15	19.14		19.1		14.74	12.37	24.29	23.02	14.67	14.69
				21.03	14.35	17.05		18.74		14.52	13.38	19.19	19.82	14.51	16.13
				18.1	12.62	19.41		17.26		14.13	18.77	16.62	18.19	14.64	17.55
				17.64	12.45	18.88		20.68		16.36	15.62	16.19	18.69	22.66	17.24
				17.49	15.71	14.66		17.32		20.26	15.26	20.19	20.27	16.59	14.65
				15.26	16.39	19.76		17.28		16.58	14.03	20.17	19.87	14.92	17.14
				22.71	18.41	19.23		13.41		14.52	15.78	15.74	22.17	16.03	16.37
				17.89	12.71	16.33		16.12		15.52	16	25.36		18.25	16.45
				20.11	15.58	18.4		15.98		16.88	13.49	18.85	21.97	14.25	16.37
				15.28	14.59	14.95		20.21		20.89	14.09	20.36	22.24	17.55	14.1
				18.82	12.42	16.56		18.93		15.71	13.66	16.55	22.08	18.16	18.72
				16.67	13.64	17.15		18.52		15.32	19.08	21.88	20.63	16	16.09
				16.71	14.42	20.61		15.01		17.44	13.2	20.66	21.2	20.66	15.74
				17.34	16.82	17.13		19.42		18.89	13.51	19.12	31.76	15.2	20.64
				16.53	15.6	16.08		17.67		18.46	14.81	15.86	20.51	17.66	18.93
				16.4	13.4	19.4		18.69		15.16	15.47	17.65	16.45	15.61	16.73
				18.25	13.93	20.72		20.43		16.34	18.57	24.06	18.04	17.4	15
				20.36	14.91	15.58		17.4		15.46	13.99	21.89	20.57	21.04	19.11
				17.49	16.73	15.18		20.68		14.16	16.93	24.79	16.63	13.48	15.14
				19.06	14.16	18.06		20.18		16	17.93	18.95	18.13	12.52	16.16
				15.46	15.83	19.21		18.2		14.45	14.53	22.59	16.68	12.92	17.46
				21.57	13.9	24.12		19.58		18.25	16.1	23.24	18.07	17.04	17.4
				14.9	26.73	18.06		20.88		17.84	13.71	21.02	20.07	16.53	15
				15.05	14.68	23.67		16.95		14.82	14.62	17.6	23.95	15.68	15.67
				15.52	17.19	18.88		18.52		15.11	13.57	29.42	18.56	16.81	16.22
				18.29	15.78	19.9		16.65		18.41	14.72	25.18	17.38	15.23	14.34
				16.13	13.48	18.53		17.38		18.71	16.58	21.57	19.48	18.57	14.83
				18.22	14.17	25.42		19.56		15.14	18.66	19.57	15.99	17.11	15.03
				17.41	14.82	20		18.91		13.6	16.26	19.27	17.5	21.02	13.89
				21.94	13.63	23.1		17.53		14.02	15.57	21.91	22.98	18.77	14.27
				14.81	15.02	23.68		20.2		17.2	17.2	16.47	19.27	21.69	18.96
				14.53	14			19.06		16.26	16.28	19.23	16.57	16.38	19.19
				17	14.74			16.25		17.49	16	16.91	19.7	17.55	14.57
				19.16	14.77			18.57		15.67	15.17	21.81	17.32	18.49	13.9
				22.81	14.66			20.14		16.22	16.71	17.74	21.19	18.9	16.66
				20.96	15.21			22.78		17.64	18.36	26.63	16.26	20.11	13.71
				21.3	16.76			21.76		15.42	17.37	21.76	20.95	16.66	19.02
				17.66	14.05			20.13		17.32	20.98	18.6	15.3	19.04	17.44
				27.7	17.16			17.87		16.13	16.96	21.06	18.31	19.84	16.93
				12.88	15.83			18.85		18.96	20.69	16.46	16.41	17.99	15.2
				19.03	23.91			23.71		22.61	16.93	18.84	22.02	17.94	19.35
				16.7	13.27			19.67		17.06	19	18.92	15.78	19.95	15.37
				20.87	15.4			18.85		16.08	17.09	17.52	18.59	18.38	18.65
				15.93	17.74			17.4		17	20.93	16.77	20.21	19.17	17.58
				17.04	38.63			20.67		13.11	22.5	20.44	14.25	17.66	17.67
				22.69	22.54			22.1		18.15	20.28	20.66	20.73	17.07	18.54
				19.8	18.33			20.02		15.84	19.79	20.01	15.07	17.5	18.56
				20.19	19.26			18.37		15.2	17.93	20.98	13.42	16.03	19.35
					20.85			18.63		17.39	18.33	18.22	20.7	22.46	16.43
				21.83	18.34			16.82		20.36	23.78	27.54	17.35	22.05	18.26
				19.11	20.44			18.4		17.52	19.6	21.38	16.77	17.86	15.36
				18.44	18.82			26.07		18.66	17.23	21.37	12.61	16.88	15.87
				20.32				16.28		13.72	15.82	18.88	16.56	19.67	16.33
				20.36	25.54			18.85		15.77	20.56	22.88	15.91	17.91	24.15
				20.23	20.23			18.4		16.54	15.81	23.13	18.68	21.91	18.77
				16.96	20.54			18.79		19.36	15.64	22.81	13.18	27.83	20.74
				16.65	21.58			14.78		17.4	16.56	21.21	21.25	17.07	17.16
				15.57	18.95			16.25		13.69	15.09	26.5	20.11	21.54	19.76
				17.55	23.49			22.49		14.4	15.77	27.21	13.3	20.17	17.32
				18.79	24.54			20.19		19.35	16.27	22.76	15.72	19.37	18
				15.7	18.04			15.7		19.13	20.44		17.84	24.65	15.6
				16.34	17.93			14.82		15.91	16		19.56	30.34	18.54
				17.51	17.94			14.53		15.72	14.75		17	18.84	16.04
				15.58	17.75			15.41		22.87	14.73		15.76	28.11	19.06
				15.03	18.22			13.85		16.2	19.45		17.27	25.28	18.03
				15.11	16.98			13.97		14.53	15.96		17.48	23.64	15.89
				17.58	26.24			18.04		16.27	14.95		18.11	32.33	18.47
				13.41	18.98			20.42		16.18	17.48		16.39	23.66	17.36
				16.02	18.67			15.47		16.15	16.42		17.84		16.33
				14.09	17.52			17.54		18.24	20.72		20.08		20.06
				15.14	16.55			17.06		19.74	18.17		17.59		17.25
				16.99	16.46			13.96		18.71	18.83		18.37		17.85
				15.85	16.84			14.86		15.36	16.28		18.2		21.21
				14.72	16.74			20.76		15.75	14.12		17.75		14.95
				14.68	16.68			13.67		14.67	16.02		19.89		17.84
				13.64	17.11			15.46		16.17	17.35		16.81		22
				14.98	18.11			17.05		15.88	14.03		18.51		21.38
				14.7	22.7			17.76		17.99	15.1		18.53		19.3
				19.7	18.73			19.84		18.5	19.97		19.11		27.7
				17.22	18.52			14.16		17.15	13.93		19.47		17.23
				17.29	16.65			25.32		16.88	18.25		18.27		30.57
				14.77	14.98			18.01		20.88	14.76		19.57		16.7
				14.37	16.32			14.97		15.41	14.65		21.34
				12.82	17.93			16.31		18.87	16.81		19.01		25.65
				14.82	18.58			19.33		14.89	12.36		21.13		16.21
				19.3	16.81			18.95		16.55	12.12		22.91		17.93
				14.25	15.46			17.34		18.06	17.57		18.47		21.42
				21.16	20.22			20.15		16.96	15.59		23.92		19.86
				15.4	14.54			23.57		19.75	18.62		18.02		24.41
				15.85	14.8			20.36		17.56	25.77		18.67		18.08
				15.32	16.23			14.84		16.63	22.56		21.23		18.86
				14.34	15.19			16.36		17.58	20.08		20.93		16.04
				16.61	16.33			18.66		17.58	13.18		20.01		14.07
				15.74	16.13			15.75		15.79	17.67		17.6		17.41
				17.29	13.71			21.43		18.52	27.85		19.52		14.45
				15.91	16.51			24.71		18.5	15.41		16.42		20.14
				14.68	14.33			16.62		16.18	16.49		17.5		15.14
				16.4	17.15			14.33		18.56	14.1		18.51		15.3
				13.96	11.59			20.24		18.78			20.58		15.83
				15.65	15.4			24.04		16.06	23.1		19.85		17.69
				16.29	17.08			16.82		16.76	16.83		14.42		18.94
				14.17	16.71			22.62		15.89	18.87		13.75		16.73
				14.41	13.29			31.22		15.38	22.34		20.28		17.88
		17.6	20.07	19.29	11.51			17		19.63	27.5		17.96		15.58
		17.39	19.59	16.43	14.75			16.77		17.15	17.65		15.34		17.24
		18.93	22.13	14.36	12.72			16.41		15.43	19.53		17.81		18.06
		16.25	25.46	15.94	15.33					16.5	15.16		14.01		20.79
		13.63	18.49	15.65	18.86			21.16		13.94	18.01		17.84		15.05
		15.22	17.86	20.9	16.57			19.77		18.78	17.55		16.39		16.3
		15.51	14.72	15.24	16.32			21.77		15.73	19.86		20.64		13.93
		15.21	17.78	14.4	17.71			21.17		14.84	15.31		21.42		20.09
		12.4	23.63	15.88	15.77			19.2		16.18	14.82		22.47		13.81
		17.85	20.7	15.02	16.5			23.06		16.86	13.94		14.84		17.49
		19.88	15.96	15.69	15.85			30.09		16.66	14.53		16.2		15.52
		14.57	27.08	12.96	21.91			17.45		14.56	16.81		14.81		16.11
		13.42	17.46	15.37	17.05			19.27		15.07	15.52		16.17		17.81
		11.81	11.21	16.08	16.48			18.05		14.95	14.1		16.73		16.84
		11.16	14.87	14.57	19.11			15.45		16.86	14.46		16.99		20.99
		17.71	12.25	13.86	16.26			21.32		15	20.58		16.68		15.51
		13.28	15.89	19.51	15.47			16.66		14.58	19.7		18.28		14.11
		19.88	10.92	16.46	15.63			20.18		15.33	16.56		18.34		24.15
		11.25	18.01	14.6	14.35			15.21		20.1	25.46		16.62		13.64
		15.82	18.6	20.43	17.11			15.2		15.7	16.28		16.38		12.64
		15.79	15.31	18.91	13.69			15.41		20.7	13.74		22.07		15.21
		17.46	12.18	18.93	16.77			19.99		20.21	17.85		15.15		15.8
		14.44	15.62	13.49	16.44			17.54		19.21	16.28		17.61		18.87
		15.78	17.49	13.23	15.53			22.05		18.06	15.26		18.28		16
		15.54	20.02	14.43	11.06			17.11		20.57	17.87		14.74		13.88
		18.41	22.19	12.43	16.06			16.09		16.86	14.87		18.92		14.14
		19.43	17.3	13.7	17.87			17.46		18.38	15.42		15.07		15.17
		13.77	19.69	16.76	17.81			14.63		17.74	17.67		17.79		16.2
		18.36	17.57	19.03	15.35			20.04			23.1		14.56		14.14
		15.08	18.09	14.84	18.81			21.46		29.77	17.36		17.28		23.77
		15.96	18.34	18.88	15.39			20.3		20.95	17.83		22.85		17.06
		20.58	18.95	17.49	21.03			20.89		21.81	13.68		17.68		19.7
		17.31	14.88	16.08	10.76			15.8		20.4	16.69		22.43		17.17
		16.78	17.29	18.05	16.59			21.87		22.57	14.65		15.91		17.59
		15.15	21.63	15.97	11.67			20		19.68	16.26		16.62		14.14
		16.46	16.15	17.7	13.76			20.8		30.2	16.03		15.28		18.41
		16.75	14.36	14.88	18.38			24.95		19.37	16.85		19.77		16.11
		18.26	19.89	15.43	11.72			15.19		20.61	13.78		25.22		13.57
		17.61	15.49	16.05	13.1			18.86		23.65	13.58		21.9		24.34
		18.2	20.01	15.77	15.03			20.21		20.37	17.13		18.74		15.77
		18.15	16.33	18.05	17.09			15.35		20.92	13.66		18.36		18.79
		17.43	17.16	15.27	14.98			18.73		17.55	15.17		14.96		15.35
		19.52	18.39	16.7	12.81			15.87		19.34	13.97		17.39		12.52
		17.49	14.35	15.71	18.74			17.14		16.81	14.61		19.28		13.9
		18.79	16.85	18.91	17.09			20.86		18.35	12.71		15.26		14.76
		18.91	17.62	16.49	12.81			21.48		16.2	12.83		20.04		11.46
		19.15	19.27	16.67	15.84			19.85		18.9	14.11		21.25		20.17
		18.95	25.12	14.63	15.72			16.87		18.96	15.02		30.78		16.97
		20.05	18.72	15.09	20.41			15.12		19.33	16.28		24.56		11.25
		17.7	19.59	15.04	20.56			15.14		15.05	14.25		17.45		16.71
		17.52	15.21	13.41	19.84			19.37		20.69	14.63		20.59		14.62
		19.18	15.94	16.35	12.36			17.42		16.74	13.41		25.12		22.19
		24.17	21.61	16.37	14.86			16.98		20.39	15.26		16.92		15.56
		19.05	22.89	14.84	13.37			17.75		18.29	14.24				11.28
		18.07	20.85	19.47	14.42			24.28		18.02	14.68		26.99		17.54
		18.07	17.6	13.98	18.15			17.36		16.95	15		25.73		13.66
		16.54	19.22	14.07	12.79			17.25		21.53	13.53		24.01		13.41
		16.1	20.17	14.18	16.61			18.9		20.55	18.41		24.24		12.44
		17.2	23.65	14.78	17.33			20.65		23.68	15.82		24.01		14.51
		18.73	14.77	17.02	14.58			16.39		17.87	15.25		25.48		14.48
		21.06	18.83	14.98	16.7			16.9		24.28	14.43		21.51		15.57
		15.01	15.84	15.26	15.29			15.93		16.89	15.29		26.92		14.54
		15.6	27.99	14.23	15.77			20.03		16.95	14.4		21.34		16.7
		18.86	21.46	15.1	17.28			17.43		17.31	14.59		20.37		12.84
		16.02	17.92	16.33	17.16			22.79		21.48	13.62		23.09		22.33
		14.23	17.77	12.8	18.29			19.62		18.13	16.25		22.32		14.92
		15.16	17.64	17.75	13.74			19.23		17.37	13.75		20.87		16.11
		15.38	21.59	12.74	14.97			17.44		14.58	15.52		23.14		19.02
		16.94	21.04	11.56	14.8			19.94		17.27	16.94		21.81		14.42
		18.77	15.36	14.71	16.75			17.03		17.95	15.95		22.75		17.25
		16.11	24.36	18.41	15.78			17		20.18	15.97		21.59		14
		15.83	16.96	16.06	14.77			18.73		18.46	14.85		22.67		16.89
		19.94	22.1	13.57	17.81			23.32		15.82	12.57		19.33		17.21
		16.74	19.2	16.01	18.87			21.98		16.31	13.91		20.45		15.88
		15.41	21.08	11.83	17.2			20.15		21.74	15.56		24.81		19.63
		15.58	19.87	13.07	19.38			16.38		14.82	14.49		19.9		19.54
		16.71	20.4	14.53	12.28			18.33		20.76	14.65		21.69		15.84
		16.51	15.24	18.09	24.49			14.36		23.04	13.5		19.98		15.33
		16.97	17.83	14.47	19.26			14.81		13.68	16		24.77		17.29
		19.88	19.97	16.12	15.87			15.28		20.25	16.44		27.61		15.59
		15.71	20.6	14.27	12.78			18.35		18.39	14.67		21.71		17.06
		18.62	15.81	14.04	15.85			16.96		17.15	14.77		20.49		14.87
		14.7	13.8	15.3	16.27			21.68		21.21	14.49		23.37		16.99
		16.43	19.52	12.99	13.3			15.76		19.84	14.14		18.86		15.2
		17.73	21.26	14.82	19.02			14.66		14.86	15.37		19.17		20.21
		14.86	15.02	13.06	15.89			14.6		13.81	16.08		20.95		20.98
		15.49	21.41	18.7	18.17			15.15		20.91	15.58		20.57		14.27
		17.9	22.1	14.45	17.76			19.64		17.6	17.87		21.77		16.12
		15.28	14.27	14.52	24.65			21.45		15.23	18.33		24.14		15.69
		14.17	21.91	18.69	17.82			16.96		17.05	16.95		19.59		16.8
		18.53	18.19	14.95	17.66			23.71		20.33	14.23		24.39		14.52
		18.42	20.95	14.64	21.13			15.51		23.34	13.43		24.34		14.37
		17.61	20	23.01	19.62			15.4		18.16	17.2		21.01		15.94
		19.06	14.12	14.62	15.98			15		17.89	13.74		19.08		15.88
		17.97	19.19	17.52	19.43			15.7		18.35	12.22		18.47		18.11
		16.56	19.51	14.82	22.84			16.94		17.96	14.05		17.27		15.26
		18.09	26.62	15.59	16.04			18.51		21.61	17.31		19.36		16.35
		19.38	15.25	15.23	18.85			16.4		18.83	16.49		14.94		19.91
		16.66	16.8	19.5	16.56			21.18		19.99	13.05		21.91		15.15
		14.32	18.65	16.06	16.91			20.14		19.52	15.46		21.82		13.67
		15.3	15.88	16.49	17.77			17.75		17.13	13.82		22.02		13.42
		15.86	17.26	18.05	15.87			21.07		17.78	12.38		22.98		16.13
		18.22	19.82	16.44	17.11			16.83		18.65	13.44		14.43		15.03
		18.35	23.93	18.6	19.28			17.2		17.74	17.81		15.13		16.12
		14.47	18.4	17.9	16.52			16.96		20.52	12.3		19.82		15.28
		17.01	16.78	19.26	26.98			19.07		24.14	15.17		23.29		15.36
		16.03	23.93	17.02	16.53			18.98		17.38	22.44		13.39		14.78
		17.19	18.09	16.29	15.99			20.12		19.44	12.35		22.41		15.78
		15.52	21.08	17.27	16.89			16.91		20.04	16.05		20.61		14.37
		15.28	16.66	16.44	16.98			21.13		17.53	13.86		16.43		16.52
		17.34	16.46	16.28	15.25			17.26		18.42	18.94		20.46		13.55
		19.06	21.42	16.99	20.32			16.75		18	12.29		13.86		14.27
		16.43	16.43	19.38	22.24			18.85		16.24	17.13		19.61		14.22
		18.18	19.46	18.02	19.4			19.39		17.64	16.02		24.47		13.92
		15.17	20.85	16.96	20.85			17.81		18.83	13.62		16.39		16.21
		14.03	19.09	19.62	20.84			18.98		18.73	16.02		21.73		14.31
		14.67	15.39	14.91	15.07			21.06		16.54	16.99		15.85		13.09
		17.53	25.15	14.88	16.27			20.71		17.46	14.24		23.96		17.88
		17.68	16.95	17.29	20.18			18.8		16.56	15.53		19.35		13.27
		15.44	19.88	14.92	16.65			18.88		19.2	13.79		19.61		15.3
		16.52	19.65	18.5	25.29			19.33		18.45	11.54		15.42		14.07
		20.89	18.83	15.25				17.21		17.88	15		19.66		13.68
		15.48	15.39	27.06	28.49			16.26		20.66	11.67		19.3		14.66
		17.02	15.57	17.56	24.24			20.95		17.64	17.18		30.55		14.27
		19.11	17.24	15.36	21.13			16.38		18.26	15.33		18.75		13.77
		16.05	22.78	17.55	18.19			18.96		16.26	13.41		18.48		16.56
		20.17	15.45	20.15	23.33			19.42		23.62	12.99		23.28		13.97
		15.41	16.79	25.16	19.22			16.3		20.61	16.24		19.53		17.32
		14.13	17.34	15.84	25.44			19.49		15.96	22.28		16.52		13.65
		16.92	16.25	19.54	23.21			21.32		16.2	12.57		21.84		17.84
		15.92	19.43	18.41	17.37			18.83		17.5	17.83		21.53		12.19
		16.68	18.14	16.35	16.36			18.86		19.74	15.8		17.76		13.47
		20.49	15.82		15.86			18.68		18.28	13.11		30.89		16.03
		17.55	17.08	22.59	23.87			17.67		17.47	11.88		22.66		15.62
		18.49	20.35	18.73	20.45			17.15		18.3	14.15		16.55		14.05
		22.79	17.19	14.04	17.95			19.08		16.42	14.53		19.51		13.06
		18.79	17.03	16.37	16.32			16.74		21.68	13.44		17.24		12.46
		19.35	19.57	17.71	13.1			17.9		17.74	10.98		13.66		16.9
		25.79	20.69	18.72	16.47			21.87		15.73	13.92		17.05		16.53
		19.34	18.88	18	15.33			17.2		18.63	11.17		18.35		12.37
		18.73	25.94	12.68	15.36			17.99		16.89	17.71		22.65		12.21
		17.42	17.58	14.66	18.16			19.67		18.8	15.77		23.03		15.2
		23.05	23.46	28.95	16.96			21.28		18.75	16.72		17.27		15.8
		17.73		15.75	12.82			25.9		18.6	13.4		21.78		12.68
		19.6	19.07	12.59	15.02			22.1		16.79	15.22		13.89		15.55
		19.51	20.81	15.26	20.89			24.54		15.83	12.7		16.94		16.85
		19.28	20.8	21.22	11.5			18.33		18.29	13.44		17.46		13.79
		19.71	21.52	12.88	15.76			21.08		15.66	13.63		16.95		17.4
		17.78	16.78	14.14	14.97			22.36		20.34	14.12		16.3		12.8
		15.3	16.27	13.86	11.31					17.89	13.31		23.64		13.47
		17.53	18.42	17.63	15.73			22.55	26.23	17.84	11.89		26.82		13.05
		14.06	16.42	14.24	17.83			17.7	27.78	19.3	12.59		18.29		12.29
		20.52	18.56	13.41	21.01	23.23	24	17.3	24.64	15.3	14.02		24.62		15.64
		16.78	18.57	14.72	16.34	20.02	21.09	22.55	23.31	16.71	12.59		19.01		21.15
		21.36	18.88	23.95	14.66	20.97	22.04	28.8	25.08	24.22	14.43		18.54		14.89
		18.14	15.19	12.49	17.66	23.28	21.41	31.68	27.78	17.83	16.1		19.67		12.69
		19.65	14.23	15.58	14.26	21.92	23.89	16.29	24.09	21.15	16.81		20.69		21.49
		21.52	15.98	19.44	14.81	18.28	22.82	27.82	22.21	17.86	14.5		17.68		18.32
		17.03	19.58	15.22	14.03	19.01	17.13	17.13	23.42	18.45	12.33		26.03		16.04
		16.38	14.43	12.16	15.41	22.74	21.24	13.51	23.26	16.96	12.73		17.14		21.2
		13.67	15.53	16.02	19.39	14.99	15.89	26.12	23.26	16.54	15.23		20.23		19.51
		15.55	14.99	11.88	19.9	15.37	36.13	14.87	18.5	18.15	14.05		19.66		14.84
		21.05	15.8	17.29	19.52	20.33	14.33	25.52	21.65	25.41	13.25		19.78		15.97
		17.86	18.9	19.84	15.68	18.3	18.28	19.03	19.52	21.51	15.8		18.23		21.16
		24.71	17.72	18.05	18.75	18.4	17.76	35.19	21.25	20.04	13.21		21.04		14.59
		23.17	18.09	14.79	12.79	15.39	18.4	22.34	19.07	26.09	15.51		19.59		23.17
			13.2	12.94	12.79	21.41	17.75	20.25	19.83	24.9	13.81		22.81
		22.96	16.29	21.39	13.28	18.3	15.68	15.97	22	20.45	11.63		27	17.27	16.25
		17.65	16.36	12.77	17.15	21.84	22.15	18	22.96	21.38	15.6		18.96	17.81	15.44
		16.46	13.48	16.52	18.77	17.75	15.51	16.37	26.64	23.27	14.98		24.61	19.49	18.55
		18.25	16.52	17.49	18.43	22.33	16.77	24.78	24.16	23.71	14.92		26.47	18.86	14.6
		17.51	15.75	16.63	13.66	22.29	19.6	21.42	19.81	24.32	13.91		20.87	20.63	16.42
		16.37	12.17	15.2	19.56	22.24	17.7	20.82	18.06	26.53	13.53		20.99	15.08	21.66
		19.15	14.91	13.9	12.65	20.88	16.2	21.71	21.09		12.57			21.01	18.71
		16.39	17.11	13.78	13.36	21.4	20.49	19.43	24.37		13.9	27.96	30.54	15.91	13.03
		22.85	16.15	16.34	16.01	19.88	18.86	19.33	18.89		13.36	21.51	25.28	15.83	13.81
		16.06	18.28	13.93	19.1	21.66	23.89	21.46	22.05		12.85	27.7	25.21	15.57	14.04
		14.78	13.21	19.58	15.34	23.78	18.46	22.75	23.95		13.44	21.25	19.71	14.72	11.78
		13.34	15.18	17.25	18.06	17.39	17.62	21.11	22.31		13.48	34.73	18.97	14.7	13.73
		17.08	15.09	18.27	18.17	20.76	24.64	24.59	21.66		13.47	22.81	22.88	15.47	12.46
		13.62	21.57	19.41	19.98	22.91	16.24	17.83	22.34		14.69	17.53	31.63	15.45	13.89
		17.35	14.73	15.49	16.77	22.68	18.58	25.25	20.47		11.9	21.9	19.68	15.76	14.8
		13.95	17.81	19.48	19.1	23.59	20.71	19.26	18.71		13.17	19.53	20.02	14.83	16.36
		14.71	14.66	16.47	19.11	17.55	21.38	20.47	24.37		12.08	16.99	20.63	15.41	12.29
		14.96	17.92	13.21	15.94	20.2	16.23	23.62	20.55		21.99	15.69	25.5	15.08	20.07
		14.59	16.31	14.67	17.54	16.93	20.48	21.7	25.01		13.6	16.02	17.11	14.1	13.5
		16.45	16.02	15.95	19.4	27.87	18.33	19.84	21.47		13.12	15.93	17.7	15.3	12.46
		15.64	16.24	14.96	18.59	20.66	18.14	18.79	20.21		12.95	17.24	18.9	15.34	16.65
		14.2	17.69	18.58	16.98	17.23	16.7	22.08	22.48		9.97	23.99	18.11	19.45	16.39
		16.61	13.77	15.99	18.62	22.63	15.08	16.47	21.7		13.58	24.2	18.82	16.62	14.97
		14.69	19.11	13.35	18.17	24.47	14.63	20.48	18.78		11.74	15.88	21.37	14.96	13.34
		14.37	16.28	17.52	18.54	25.08	16.04	19.29	20.42		14.24	16.17	19.1	12.77	17.95
		15.34	18.77	17.46	20.66	21.68	15.81	19.59	20.97		13.38	22.77	22.77	13.79	11.12
		15.12	16.43	18.8	17.3	17.36	19.26	23.01	22.16		12.04	19.18	19.77	12.35	13.69
		13.94	14.38	20.12	18	24.97	15.83	16.64	20.07		15.85	18.26	21.91	15.52	18.7
		18.09	15.48	15.57	21.35	16.69	19.13	19.06	23.96		11.98	17.71	19.56	13.51	11.65
		14.87	15.96	16.9	17.04	22.25	17.22	21.45	19.56		11.87	16.47	23.06	14.42	15.57
		16.58	15.47	22.26	17.49	22.04	15.81	19.62	23.96		13.52	21.19	19.66	16	14.73
		16.12	17.2	13.51	18.21	14.73	17.87	19.26	20.74		15.96	25.69	19.24	20.15	15.31
		15.59	19.23	16.9	16.22	24.93	15.24	21.11	20.62		11.11	21.41	18.27	14.43	12.99
		14.96	19.07	14.67	16.51	15.22	14.9	16.3	21.53		15.91	15.88	20.72	18.7	12
		16.35	18.25	18.49	15.88	14.87	22.67	20	23.99		12.11	19.98	23.79	12.99	16.42
		20.7	18.02	14.89	15.7	21.75	16.92	20.81	28.25		12.76	21.26	21.01	12.96	10.93
		14.71	21.39	18.06	17.09	21.01	16.63	21.31	21.49		16.8	18.85	21.18	13.5	10.65
		14.99	15.75	16.23	17.79	27.18	17.13	19.85	19.45		14.62	17.02	21.36	14.89	16.29
		17.49	15.15	17.52	17.36	25.24	18.25	20.76	23.45		14.33	22.06	21.93	16.76	16.26
		14.84	15.59	16.23	17.02	20.46	17.16	16.17	20.2		15.81	17.52	17.98	18.94	17.52
		16.79	18.21	15.01	14.69	21.7	16.54	15.68	22.4		13.39	23.5	15.67	14.07	16.4
		15.55	16.75	19.51	16.56	23.34	19.96	19.14	23.49			22.03	17.48	19.31	15.29
		13.92	14.59	14.44	21.58	18.03	17.63	18.34	16.92		22.73	18.37	18.53	17.49	13.92
		13.86	15.46	19.25	15.01	20.61	23.41	17.1	23.85		23.72	18.12	18.11	15.28	15.05
		14.14	18.28	18.49	17.63	24.92	21.67	15.34	19.57		21.94	21.02	14.94	15.44	16.55
		15.62	13.66	18.28	17.62	21.79	15.31	14.17	22.84		20.42	20.83	19.16	17.33	12.67
		14.54	16.82	17.56	15.36	21.28	16.83	17.35	19.66		20.94	17.69	22.6	20.76	13.66
		15.89	15.15	18.96	16.33	20.58	15.15	17.69	20.35		16.27	17.09	18.95	19.29	14.59
		17.27	19.69	15.67	14.83	20.49	18.59	19.48	16.62		16.47	19.82	20.58	22.75	13.93
		14.53	19.53	17.21	16.99	18.28	21.07	18.65	17.01		20.68	17.83	13.99	20.65	20.59
		15.69	14.51	13.64	17.26	19.12	22	27.32	22.5		16.89	20.77	21.09	20.97	17.91
		16.99	17.17	17.6	17.38	21.42	14.82	18.73	20.09		18.42	24.69	23.05	24.13	18.31
		15.57	16.12	16.64	15.68	22.51	21.57	18.23	20.73		18.43	15.31	21	17.49	14.49
		17.28	19.61	15.59	18.53	20.76	20.27	18.93	18.84		16.22	17.8	14.48	20.54	16.64
		19.52	17.63	18.87	14.73	19.68	17.06	15.56	19.54		16.34	18.91	14.41	19.82	14.25
		15.53	16.68	13.52	15.99	19.91	17.42	23.84	18.51		13.73	20.43	17.28	20.41	15.96
		16.85	14.36	18.98	17.7	21.49	16.89	13.83	20.35		15.35	18.04	18.66	21.97	17.76
		17.6	17.45	18.98	19.37	19.67	20.48	18.78	19.66		21.63	17.52	15.24	18.85	14.93
		17.74	18.24	22.68	24.92	18.1	21.75	19.64	19.31		16.89	16.54	22.44	19.71	17.37
		18.35	16.59	16.23	16.51	18.39	21.16	15.72	19.07		15.71	15.09	23.74	16.94	15.75
		16.32	17.46	19.26	17.86	19.12	21.49	19.12	21.32		16.47	19.46	24.61	23.31	16.44
		14.69	19.55	14.17	16.89	19.01	19.06	13.64	18.77		18.6	16.69	20.54	17.85	14.44
		18.99	17.82	18.26	14.45	20.23	18.89	21.2	20.21		17.89	18.4	16.6	16.86	14.84
		14.6	16.51	16.87	16.69	15.85	23.28	21.27	17.21		15.33	16.25	24.17	16.54	19.22
		17.22	19.35	15.13	17.41	21.69	19.62	22.59	18.43		17.71	17.28	16.04	16.65	18.65
		18.1	15.35	15	12.65	23.47	19.33	16.08	18.32		15.3	17.51	15.56	16.99	15.39
		21.15	16.08	15.28	19.4	16.17	24.02	21.39	19.84		15.48	21.6	24.28	17.58	14.37
		16.11	21.26	16.44	16.89	16.21	16.99	20.14	23.89		15.93	20.37	21.62	18.53	14.67
		14.38	17.31	27.33	14.51	16.34	19.61	16.12	17.18		16.66	17.08	18.57	22.09	15.95
		18.11	18.56	16.4	18.52	20.97	17.42	14.47	21.17		20.39	16.03	15.89	22.33	18.86
		14.57	15.25	15.44	22.27	19.43	16.26	26.72	20.52		17.54	16.82	19.52	15.4	15.96
		15.64	17.28	14.74	15.64	21.99	15.22	20.11	21.3		15.62	18.16	21.96	15.58	17.93
		17.59	16.14	18.78	14.16	15.16	16.72	16.28	17.41		14.58	18.61	17.15	16.55	16.46
		14.98	18.25	14.46	19.8	17.92	20.77	20.54	17.55		15.48	18.54	24.46	19.32	17.99
		17.33	21.53	14.22	15.31	24.34	14.84	15.28	15.62		14.67	18.74	22.53	17.82	15.76
		16.9	18.84	18.34	19.4	17.66	16.04	21.71	18.76		15.5	17.93	17.91	18.71	16.21
		17.51	20.78	15.88	17.41	16.19	15.52	19.84	22.01		13.16	21.92	23.67	20.21	16.99
		18.41	20.05	14.85	14.43	18.79	18.56	18.49	22.42		16.95	31.01	23.75	21.73	19.47
		14.58	19.37	16	21.02	17.39	18.17	24.49	17.53		16.28	18.48	21.64	16.37	21.21
		15.12	17.89	14.95	16.37	21.26	16.96	18.24	19.47		16.38	18.77	24.22	17.93	16.81
		17.87	20.19	16.54	16.34	16.5	13.29	22.39	19.18		16.18	18.33	22.72	22.56	20.15
		15.58	19.55	17.86	25.15	19.87	20.41	20.21	22.9		12.66	18.4	20.26	22.45	15.31
		17.68	18.41	19.59	17.09	22.68	20.67	20.43	22.42		16.84	23.34	19.8	20.05	21.8
		15.92	25.53	15.38	12.09	19.01	18.21	22.5	21.91		14.66	21.21	21.68	19.56	18.38
		17.49	17.5	18.32	22.85	21.16	21.32	18.67	19.81		16.81	19.8	20.92	16.46	17
		18.07	18.71	16.96	15.34	22.94	14.9	20.74	21.31		13.81	16.62	23.66	15.56	15.16
		16.88	16.99	14.74	14.46	18.17	20.24	20.65	16.05		14.42	25.93	21.47	18.75	15.9
		21.11	16.71	15.17	16.69	20.84	18.56	19.21	24.43		21.9	17.28	20.25	18.88	15.22
		20.35	20.36	15.65	12.4	20.88	14.01	19.61	14.83		15.17	18.53	24.07	21.12	14.05
		15.4	16.89	18.68	20.15	17.34	17.49	21.59	20.1		17.38	24.1	17.69	20.65	14.16
		17.19	18.31	18.64	16.62	28.75	17.12	23.23	24.43		17.81	20.7	21.19	20.31	13.76
		16.89	17.51	16.72	18.28	22.66	11.98	20.19	13.04		13.35	17.95	18.91	22.75	14.37
		18.18	16.9	21.03	14.89	19.08	19.09	18.14	26.13		14.13	20.95	26.15	20.96	20.16
		20.57	23.81	19.96	21.94	18.97	16.72	28.52	28.83		18.74	20.84	18.31	14.62	17.7
		18.8	24.2	23.72	14.22	21.46	20.32	18.47	26.49		16.92	27.97	16.66	14.92	18.52
		19.56	16.1	16.06	19.02	23.62	14.17	20.24	15.03		17.93	23.32	20.81	16.57	13.4
		20	16.41	14.32	20.99	19.73	18.06	21.79	15.39		16.75	21.26	20.02	23.13	18.28
		16.79	18.64	18.75	17.41	16.81	16.12	16	30.93		17.48	21.29	19.01	18.75	15.66
		23.72	15.23	16.6	16.65	17.79	14.87	18.73	30.29		14.62	21.08	17.47	14.47	12.04
		18.96	19.08	16.43	17.03	21.42	15.02	20.28	17.48		13.77	21.8	19.44	17.32	10.9
		19.29	19.17	14.36	16.74	27.14	20.07	19.48	30.84		15.29	23.26	17.22	14.46	17.06
		22.33	15.46	20.16	21.42	14.61	14.72	20.62			18.5	21.49	21.82	16.93	16.5
		15.47	17.76	19.05	17.46	32.59	15.14	17.52	23.04		16.04	18.93	18.53	19.42	17.23
		16.87	15.47	16.41	16.54	20.66	14.41	23.1	19.94		13.4	21.48	17.51	18.02	21.32
		16.19	16.6	18.65	15.01	16.33	15.64	27.75	19.25		17.71	22.09	19.68	20.93	13.09
		16.96	19.76	16.73	18	20.39	15.7	23.5	21.86		15.42	20.38	20.8	21.74	19.67
		17.12	15.84	17.75	21.62	29.02	15.01	22	28.65		17.41	20.97	18.03	16.26	12.64
		18.34	16.89	16.48	17.21		17.38	18.85	27.28		17.93	21.32	19.15	18.03	18.21
		23.36	26.62	15.27	15.63	22.2	16.65	23.28	28.58		16.63	17.61	21.08	18.51	17.89
		15.29	16.1	15.82	23.55	30.79	15.19	20.62	31.02		16.98	19.01	19.28	16.32	16.28
		15.41	16.26	22.38	25.86	21.32	17.97		27.04		17.06	19.17	20.35	16.29	16.71
		18.75	22.44	18.98	20.08	19.48	16.74	20.05	22.51		14.7	19.74	19.33	18.59	13.31
		14.96	20.56	19.59	16.71	25.47	18.01	19.58	18.64		18.26	22.16	21.07	19.02	16.93
		11.54	18.07	18.7	17.07	17.58	14.92	22.26	22.51		14.95	18.26	19.44	16.9	17.06
		16.87	16.71	16.92	18.84	22.6	15.84	19.01	22.71		17.88	22.44	20.36	16.75	15.28
		11.16	16.53	18.14	22.42	21.73	17.4	21.09	21.16		16.3	20.55	20.39	25.36	16.91
		24.21	17.25	17.7	25.74	24.47	19.16	23.35	25.32		17.12	17.41	18.72	19.39	14.68
		11.15	20.54	16.9		18.44	16.02	24.64	22.72		15.31	18.69	16.38	20	16.62
		18.56	15.6	17.8		15.99	16.09	23.61	21.14		17.31	16.01	17.69	16.29	18.19
		15.34	19	18.12		17.17	14.17	16.58	24.41		14.23	20.02	22.94	15.14	13.21
		17.31	21.71	17.9		22.15	15.44	17.21	21.46		19.19	19.6	29.76	17.58	17.05
		13.2	22.34	17.05		27.89	14.59	16.59	21.9		16.23	18.08	16.9	16.52	15.25
		16.26	16.67	24.09		21.88	18.08	23.44	20.19		15.51	19.59	16.53	20.59	20.73
		15.75	18.63	17.65		21.15	13.2	15.85	22.12		15.36	17.34	17.83	17.23	18.53
		13.4	15.79	21.08		21.96	17.19	25.16	17.74		19.58	22.35	21.09	14.34	14.75
		18.07	17.17	21.29		20.18	17.66	17.32	17.23		15.85	20.27	18.66	18.62	15.92
		16.57	16.42	20.73		18.33	13.39	18.36	20		16.82	22.44	18.81	15.07	15.01
		12.03	20.61	18.24		20.22	16.01	16.6	21.45		17.36	21.93	16.2	14.9	16.24
		16	13.14	20.1		17.54	15.6	16.03	19.03		21.14	26.85	16.27	20.09	17.59
		17.19	18.05	21.35		17.78	22.46	23.22	20.73		14.91	20.59	21.57	15.75	19.72
		15.71	23.7	23.24		23.43	17.38	19.82	20.84		15.45	30.39	22.55	17.11	12.75
		15.23	13.02	19.95		22.42	20.15	16.2	21.06		17.26	22.7	20.66	19.87	12.85
		13.7	13.4	19.91		22.12	19.21	19.2	19.33		17.95	25.68	18.55	16.07	20.69
		15.44	25.47	30.92		20.24	13.34	16.81	19.64		15.2	26.63	16.87	20.33	16.21
		18.27	18.73			21.8	15.89	14.42	20.5		17.68		20.59	17.57	16.52
		17.15	18.35			17.6	16.84	15.16	21.96		16.91	34.09	18.11	15.32	17.68
		18.42	22.63			21.39	17.97	20.46	20.16		23.55	26.03		13.23	10.72
		17.2	17.79			21.1	17.59	17.28	21.61		16.9	25.1	17.35	15	15.46
		22.39	19.42			23.24	15.18	20.87	19.13		17.23	22.84	16.81	14.81	15.72
		17.72	21			22.67		17.51	21.81		17.72	19.67	17.95	21.9	11.82
		16.62	22.8			17.76	21.72	16.33	25.5		16.46	19.31	21.34	15.02	20.78
		17.41	18.81			18.9	21.37	20.09	22.02		17.36	16.84	19.48	18.56	10.49
		17.16	30.77			22.9	20.17	17.7	24.08		18.97	18.01	18.95	13.06	16.63
		17.3				28.01	24.21	14.27	20.97		20.85	19.89	16.44	14.99	11.87
		18.21	22.85			17.78	16.17	19.71	25.67		16.22	16.95	19.51	23.27	17.45
		17.89	20.33			21.59	25.41	16.26	18.72		15.97	16.6	23.83	15.67	17.95
		18.57	18.91			21.4	16.34	18.19	27.06		16.17	13.68	15.25	15.92	19.83
		12.43	16.89			18.4	14.92	24.65	25.37		18.09	18.29	24.06	13.53	17.37
		15.48	19.72			25.82	22.56	23.54	22.33		20.1	18.28	16.13	21.9	17.78
		17.93	19.3			27.54	13.89	19.35	20.62		16.86	14.54	16.97	18.73	18.3
		12.41	18.23			26.04	22.62	15.9	25.88		16.12	17.93	13.59	22.04	13.87
		23.62	17.05			25.59	18.54	18.48	19.68		15.19	19.18	15.63	16.3	17.87
		15.41	21.47			19.42	13.61	23.12	22.54		18.8	14.4	13.53	19.52	18.93
		15.59	15.57			24.71	25.88	18.68	20.61		16.91	20	14.31	17.85	15.54
		16.27	17.1			22.26	15.75	20.36	23.03		14.97	21.08	24.01	23.72	16.64
		21.33	22.97			19.29	16.99	21.51	23.28		17.03	14.48	19.21		18.23
		15.51	14.27			18.44	14.6	18.7	18.78		21.81	15.51	15.01	20.04	17.2
		11.56	16.45			20.89	17.1	16.71	24.36		18.45	18.38	12.66	18.39	19.13
		15.48	17.37			21.74	19.8	15.5	18.69		18.39	17.1	18.39	19.09	16.07
		20.51	19.26			22.11	18.39	22.59	16.49		14.97	19.68	14.42	19.5	18.49
		16.02	15.86			25.02	18.54	16.9	24.35		17.31	18.02	17.73	23.31	22.53
		10.96	15.01			20.81	22.43	14.57	18.94		17.43	16.87	14.68	19.5	20.85
		13.76	16.71			26.21	17.67	17.58	19.06		17.67	17.16	18.82	22.67	18.04
		12.43	14.32			20.93	17.58	21.41	24.43		22.37	18.09	18.64	19.59	17.21
		18.07	17.12			25.64	15.34	17.81	13.91		16.12	17.69	14.93	15.71	16.67
		14.55	13.98			19.28	17.22	20.07	14.8		22.58	22.46	17.07	16.31	19.5
		13.71	16.79			20.75	19.49	17.75	21.25		15.18	19.69	14.64	20.18	14.62
		20.76	22.54			19.15	18.76	14.96	17.11		16.1	19.34	14.67	19.39	14.72
		15.89	15.15			18.46	14.69	16.7	24.9		20.53	20.28	19.22	15.02	16.24
		17.77	18.59			16.73	14.8	14.45	14.84		19.08	19.39	15.69	16.37	18.04
		16.62	16			22.34	26.06	19.7	21.73		16.87	18.54	15.02	12.32	16.38
		19	16.81			22.34	19.76	18.62	22.32		15.34	23.61	18.17	16	14.49
		16.31	14.32			18.26	17.13	16.56	16.69		18.53	17.05	15.67	16.17	20.62
		14.16	14.36			21.39	18.76	18.01	18.68		22.6	18.59	14.92	19.77	18.09
		33.26	14.61			16.89	16.56	15.16	21.29		20.53	17.42	15.52	16.64	18.52
		17.4	15.24			15.52	23.14	16.97	27.22		17.16	16.45	15.97	17.29	21.12
		26.1	16.46			20.37	17.09	17.67	19.43		24.2	17.58	15.68	15.92	19.27
		17.72	17.62			24.9	16.09	17.73	25.01		23.71	18.05	17.41	15.36	15.82
		20.56	13.98			20.45	17.52	20.61	21.99		19.44	19.45	24.1	15.28	17.45
			17.98			18.63	16.55	17.59	26.94		17.57	21.53	14.06	16.54	20.07
		16.04	15.05			19.33	16.92	16.01	23.45		19.14	20.2	13.58	19.65	27.2
		17.96	17.3			21.71	15.81	22.83	20.4		23.51	20.04	13.94	16.54
		21.94	13.26			21.21	17.8	20.39	28.32		19.85	21.27	15.41	14.45	23.88
		19.4	15.49			16.77	19.29	18.39	23.43		17.93	19.52	20.2	14.18	20.89
		15.37	16.49			19.33	17.88	17.2	23.81		21.53	20.85	18.79	14.9	17.79
		14.91	14.13			20.12	16.18	17.89	23.4		18.21	20.43	16.81	15.67	18.71
		14.74	16.74			22.81	17.39	20.66	20.32		26.74	17.63	17.78	18.02	31.21
		23.91	17.28			20.91	18.12	17.42	20.55		18.52	20.98	16.8	17.3	17.98
		12.68	17.85			17.26	16.21	27.78	20.52		19.64	21.04	13.97	15.56	20.61
		25.94	12.28			21.42	16.46	20.21	23.25		20.6	19.19	13.65	21.36	25.92
		20.12	15.57			22.01	16.98	16.56	18.36		23.18	25.03	15.32	19.58	17.62
		16.09	15.79			24	17.36	19.49	21.45		22.48	20.01	17.51	16.82	14.99
		15.34	17.34			19.84	13.79	19.05	20.3		17.22	18.91	17.81	18.14	13.99
		14.77	18.35			23.51	16.43	19.23	25.67		20.13	24.17	13.76	15.05	26.49
		12.31	19.2			17.34	19.32	22.53	20.18		27.2	17.62	18.72	15.46	16.19
		22.17	15.73			20.95	15.58	16.07	20.19		19.49	18.9	16.08	18.02	18.28
		15.92	14.91			17.5	18.29	18.96	18.34		26.49	17.3	20.32	18.2	23.15
		18.18	17.9			20.44	17.85	16.04	20.47		37.52	16.42	17.6	16.86	16.32
		15.59	18.14			19.38	22.08	17.06	27.8		21.27	18.3	19.68	18.32	17.32
		15.36	17.86			21.25	16.49	19.59	18.04			17.72	15.81	19.78	18.47
		17.1	22.09			22.22	18.37	17.17	21.13	32.49	23.74	19.57	19.7	20.01	20.64
		18.73	16.39			21.8	15.25	16	21.44	19.12	25.38	16.15	23.88	22.92	17.54
		19.51	18.28			17.57	18.6	18	26.23	18.96	17.67	14.67	17.57	17.27	21.43
		22.3	16.3			18.52	17.72	15.75	22.6	18.79	34.75	25.45	18.57	19.49	17.48
		17.18	17.24			18.05	16.58	16.94	22.08	21.2	20.72	18.71	18.77	20.09	19.08
		16.28	25.4			22.91	19	19.73	29.49	22.62	26.5	18.19	18.71	19.89	18.24
		16.33	20.51			19.47	14.05	19.01	30.68	15.23	16.26	18.02	19.5	17.93	24.18
		21.09	17.86			21.06	17.6	17.65	29.99	19.06	16.83	15.25	18.89	15.58	19.98
		16.05	15.28			16.62	17.6	15.29		19.27	23.81	14.08	16.98	18.75	18.45
		19.33	18.87			21.41	16.87	15.49	29.98	16.53	20.01	15.92	16.97	15.45	17.94
		18.55	17.14			25.23	20.86	17.84	25.03	16.34	18.02	15.19	16.97	24.48	18.79
		18.05	19.63			17.02	18.23	19	24.12	25.72	13.23	16.95	19.18	21.1	29.18
		23.54	15.06			20.11	17.34	16.63	19.14	18.23	18.07	14.88	16.3	17.46	18.73
		16.35	18.3			19.63	13.44	15.63	20.86	19.18	11.75	18.23	16.05	21.79	15.78
		18.21	16.7			25.62	15.37	17.99	22.82	36.05	11.96	15.9	16.13	18.46	18.52
		14.45	14.55			26.33	16.18	18.23	21.32	20.53	14.8	19.8	22.55	15.75	19.47
		21.08	15.35			19.75	19.09	16.46	19.63	21.34	15.51	17.99	16.92	19.32	15.23
		19.64	14.6			24.07	14.17	23.45	22.51	24.1	15.48	13.39	18.16	15.38	20.92
		22.24	18.38			22.18	13.59	18.71	24.72	19	17.95	15.16	18.73	21.5	14.85
		18.82	17.35				17.97	19.2	16.31	18.95	15.97	12.21	14.23	21.98	18.71
		14.98	18.6			24.5	17.04	17.66	17.58	25.99	12.76	11.54	15.38	15.48	15.77
		21.59	20.71			23.06	16.15	18.18	19.05	26.86	15.57	15.77	16.64	14.66	13.65
		14.7	14.28			21.84	15.72	20.15	13.82	17.13	15.14	17.98	16.69	21.28	20.8
		22.07	19.99			22.56	14.75	19.49	18.52	19.01	29.32	13.89	14.34	14.77	17.91
		19.93	16.5			17.41	13.23	18.38	16.07	17.07	17.41	17.28	18.76	20.92	15.46
		20.1	13.48			21.44	15.35	23.9	22.73	21.05	14.64	15.29	19.87	18.7	18.04
		18.61	13.17			17.92	15.41	18.96	16.12	25	18.59	15.66	21.04	16.64	14.78
		15.71	15.82			24.28	12.26	19.47	17.76	19.33	13.84	15.06	15.81	14.33	16.7
		16.46	12.63			30.13	16.91	21.57	21.37	19.49	15.83	18.82	13.85	16.03	14.02
		20.24	20.72			19.65	17.51	19.88	15.6	18.82	15.52	17.81	20.1	20.31	16.51
		20.72	19.39			19.4	15.13	17.75	19.12	17.77	16.85	17.11	15.31	19.88	15.97
		17.5	17.69			21.21	14.41	16.68	15.99	16.79	14.49	15.05	20.81	17.62	15.49
		16.32	16.01			18.91	18.99	20.13	17.21	18.56	17.75	14.87	13	22.65	15.26
		17.53	19.62			20.06	14.48	16.15	18.96	16.26	15.52	15.44	19	16.78	16.94
		18.71	14.33			18.56	20.49	20.1	17.02	21.02	14.37	17.43	19.94	22.36	17.15
		18.62	15.18			16.39	16.02	17.98	21.5	22.5	14.37	15.18	16.3	19.59	16.15
		21.25	15.89			20.78	16.38	22.22	16.66	20.42	14.74	16.02	14.64	18.6	20.63
		15.05	16.71			20.71	11.46	16.28	13.32	20.44	18.32	18.53	20.76	19.33	14.23
		18.28	13.77			19.06	12.38	19.6	18.93	21.52	17.8	17.32	17	19.4	20.3
		14.28	15.22			20.21	17	17.73	14.19	18.86	17.29	16.26	12.64	19.12	18.18
		20.49	18.76			19	12.3	19.52	12.16	21.05	17.73	17.02	14.38	24.11	12.21
		19.17	25.31			15.56	13.64	16.13	21.57	20.45	16.22	22.36	18.74	18.62	13.5
		15.06	22.06			17.58	14.05	19.17	13.21	18.75	18.81	15.03	22.61	21.1	16.39
		19.37	14.38			21.16	14.85	18.61	15.2	18.29	14.22	17.92	15.9	18.24	17.67
		19.87	12.94			13.6	20.14	18.96	19.95	18.73	18.8	18.07	14.39	24.17	15.17
		14.48	18.48			14.48	14.39	21.94	17.86	22.2	16.5	16.43	22.48	22.28	15.84
		17.93	17.11			16.78	21.67	23.03	16.95	20.47	14.2	17.88	16.04	19.06	13.22
		15.92	13.72			14.55	13.71	19.57	25.37	19.15	18.48	16.7	18.98	15.79	17.39
		20.24	15.58			16.52	20.25	19	18.49	18.5	17.18	18.3	15.18	17.75	20.48
		16.38	12.81			18.31	18.4	31.42	17.6	21.69	17.3	17.21	18.95	19.15	15.32
		16.32	14.04			14.05	17.39	20.96	18.81	21.33	16.31	16.71	15.01	17.37	16.76
		15.54	18.41			14.11	17.75	22.19	21.93	18.36	16.13	23.1	16.02	19.86	15.63
		19.34	18.52			17.63	24.64		17.3	17.76	16.79	18.79	14.34	14.43	15.44
		19.83	15.64			18.09	18.14	30.31	20.02	18.54	16.67	17.96	19.05	15.25	21.65
		18.33	12.63			19.06	18.88	19.23	20.92	16.38	22.68	18.16	23.72	22.17	14.82
		19.73	13.7			16.19	21.56	21.56	17.99	21.94	17.26	18.69	20.65	18.75	17.71
		16.31	14.36			20.26	18.14	16.35	20.63	17.07	16.2	17.9	13.59	17.08	17.48
		15.66	13.25			19.41	20.24	16.15	21.21	16	17.14	18.55	15.43	19.3	21.84
		18.56	18.08			18.92	17.51	25.1	26.72	19.21	16.3	21.33	19.62	20.32	19.49
		21.49	20.71			19.66	14.24	37.05	19.01	22.56	17.83	20	23.9	15.09	16.56
		14.61	19.78			17.19	19.32	16.75	19.82	16.6	16.1	20.72	14.46	15.3	15.28
		16.8	16.82			18.09	19.67	16.92	18.53	17.62	16.81	15.9	19.89	24.7	16.88
		18.48	17.51			21.94	17.27	18.81	19.61	15.1	19.53	18.3	15.31	18.05	14.24
		20.14	17.87			21.97	14.47	16.97	20.28	19.62	15.1	15.85	19.68	15.18	15.31
		17.04	18.55			18.04	19.19	19.66	18.77	19.18	16.84	20.71	15.46	17.27	16.61
		18.56	14.65			17.6	14.19	17.91	18.73	17.74	14.74	18.8	14.18	14.42	21.21
		17.93	17.16			18.24	20.68	23.74	20.4	19.42	14.19	16.57	15.18	16.12	18.25
		15.95	20.21			23.57	21.18	14.75	19.25	25.27	24.75	16.99	13.71	16.1	19.8
		17.43	15.91			21.93	12.13	20.81	21.51	17.69	16.79	16.56	17.52	20.04	18.62
		17.13	15.65			28.65	22.04	14.44	26.88	16.95	14.51	15.88	15.32	18.29	17.31
		14.62	16.02			18.59	12.6	18.35	17.48	23.69	19.89	23.07	14.85	18.46	22.65
		19.93	15.89			24.36	17.19	16.54	22.91	20.49	15.46	18.45	14.01	13.96	18.97
		17.33	17.06			21.05	23.07	18.02	17.3	16.69	19.05	16.22	13.61	16.93	14.78
		19.19	18.88			20.97	19.99	16.27	22.04	17.39	13.74	20.88	27.46	16.21	14.21
		15.2	17.1			20.47	14.82	18.21	21.57	19.72	16.7	17.66	21.76	21.22	17.79
		14.74	13.91			16.27	14.6	21.77	19.28	18.08	15.93	17.44	17.25	22.59	16.65
		16.45	15.55			16.08	12.96	25.89	25.88	25.57	16.04	14.12	15.94	15.68	16.65
		16.5	17.37			22.52	20.48	20.5	16.28	17.91	17.66	15.58	18.38	13.74	17.46
		14.34	13.84			18.93	18.45	18.2	21.6	18.55	19.62	17.07	16.43	15.97	19.29
		17.92	17.21			19.66	13.74	17.95	19.24	17.21	20.83	15.43	16.51	15.53	12.87
		19.25	19.17			22.29	16.02	17.32	19.89	18.97	15.25	15.44	14.36	18.1	15.6
		18.41	16.11			18.8	16.8	21.68	21.15	16.65	14.99	33.43	16.35	15.5	19.23
		17.76	9.82	18.4	28.65	20.96	14.82	16.49	19.71	15.75	14.48	20.27	13.56	13.99	17.02
		17.56	12.33	15.45	22.56	16.65	14.75	15.03	18.08	16.93	16.2	17.24	14.43	16.33	14.27
		14.83	19.73	16.22	17.71	22.76	13.27	16.13	18.63	18.61	15.21	18.52	13.51	13.71	17.8
		20.04	16.79	15.81	17.58	22.64	16.77	18.41	24.65	26.23	15.88	28.64	16.16	15.4	23.25
		13.2	9	14	20.54	26.4	14.13	14.75	15.68	22.62	19.93	20.19	18.56	17.62	14.63
		20.48	16.86	13.37	15.82	21.96	21.24	16.05	21.94	21.76	17.78	18.12	16.86	14.64	18.27
		14.68	11.23	16.05	30.78	22.02	18.92	18.19	20.28	18.49	19.99		13.27	14.56	21.06
		19.15	17.72	16.47	19.55	21.44	16.22	17.14	23.44	21.68	17.27	17.62	15.19	21.62	15.03
		12.97	9.6	20.66	16.79	22.13	24.22	16.54	17.22	17.87	14.79	16.23	15.47	18.65	18.63
		12.47	13.03	14.44	14.78	19.47	18.11	16.79	14.79	17.47	14.09	17.65	20.58	13.29	15.03
		21.25	18.93	15.5	40.89	18.9	17.33	16.01	17.72	18.38	13.25	20.77	14.38	13.29	16.6
		13.24	16	15.6	20	21.21	15.32	17.14	14.05	21.46	14.96	19.36	17.42	18.84	12.89
		18.48	18.94	16.37	18.67	19.15	18.46	15.94	10.12	17.09	15.94	16.97	14.17	13.9	15.86
		14.7	18.29	12.28	20.44	28.25	15.15	17.08	21.91	18.35	14.87	19.58	28.41	17.24	18.67
		17.2	16.94	15.95	18.88	18.84	16.68	17.02	19.99	25.53	16.1	21.53	13.32	16.78	20.37
		21.15	15.8	14.04	15.71	18.82		17.29	17.06	15.51	13.63	22.02	14.61	15.97	17
		13.4	16.92	13.27	19	16.22	18.96	11.43	9.35	18.35	12.86	16.82	19.59	18.49	19.58
		17.28	16.03	12.63	21.33	19.92	14.5	15.27	16.23	16.99	16.06	18.06	19.1	17.93	18.71
		17.49	14.79	15.14	16.79	17.91	13.84	19.35	19.9	18.34	16.17	15.28	16.24	14.8	19
		24.11	15.02	16.94	18.55	18.79	19.6	10.91	10.17	17.42	18.71	13.7	22.95	16.64	17.18
		19.42	21.56	13.2	16.54	17.77	24.46	13.55	9.5	20.77	20.28	15.14	28.13	12.55	14.95
		14.43	19.42	15.71	15.64	15.45	15.59	13.92	16.43	20.77	14.21	15.58	16.49	23.29	18.82
		15.01	20.75	16.26	17.55	17.27	15.53	18.89	18.2	16.71	21.58	16.07	16.53	11.08	14.13
		16.33	13.01	12.93	20.45	16.46	19.02	10.33	20.38	19.29	14.9	15.95		10.62	14.6
		17.43	16.11	14.72	18.79	21.8	17.03	12.99	11.11	16.23	18.45	17.17	26.39	16.54	18.9
		16.5	17.72	13.69	21.03	17.72	20.46	15.84	21.08	15.34	15.32	18	22.2	22.09	16.88
		17.63	17.59	13.82	14.86	28.34	16.1	12.28	16.88	19.09	17.55	17.6	17.25	15.65	15.99
		16.75	13.68	14.42	16.05	19.9	13.23	16.8	19.75	19.41	15.63	16.92	21.19	14.83	25.04
		16.88	21.35	13.65	21.53	18.58	24.59	16.2	16.66	16.94	16.99	17.84	17.07	9.71	17.84
		15.39	12.6	17.09	19.9	18.97	11.93	13.18	13.72	16.74	17.29	18.1	16.03	22.05	21.18
		16.29	17.46	15.6	18.25	19.08	12.83	13.56	16.92	19.32	16.41	21.42	17.24	19.08	14.88
		17.85	18.5	17	28.71	21.28	12.77	18.93	20.81	19.04	16.28	17.71	19.53	11.31	15.02
		17.79	13.69	15.31	22.59	22.85	16.96	14.09	19.46	18.86	15.54	21.47	18.56	20.81	13.14
		18.22	24.09	14.41	18.44	18.1	14.42	12.55	23	16.41	17.3	19.51	18.3	18.05	20.48
		18.39	23.52	13.26	17.71	20.94	14.55	13.85	18.76	19.2	14.35	19.16	18.43	11.26	17.67
		16.11	19.31	15.48	18.7	24.13	13.55	16.63	19.11	16.32	21.55	18.15	20.66		16.26
		18.07		16.68	20.04	20.18	14.72	15.77	22.94	19.19	16.97	18.21	16.6	26.23	14.2
		17.21	28.46	14.09	18.93	19.61	15.68	14.82	16.05	19.24	15.92	19.97	19.87	27.12	15.61
		18.49	20.42	13.79	24.56	21.76	15.29	17.67	23.16	16.12	16.38	20.02	17.64	25.62	16.8
		18.28	19.64	15.2	19.52	27.35	14.68	14.23	19.23	21.37	17.63	22.66	15.27	26.39	26.17
		14.69	23.73	16.1	21.21	18.48	15.48	15.13	20.03	19.03	18.27	16.47	19.75	20.73	15.03
		19.76	18.82	19.09	19.43	20.63	14.43	15.29	17.38	17.05	17.59	19.27	16.13	22.09	14.97
		15.16	16.56	17.58	18.21	21.15	16.22	17.36	18.53	21.76	15.78	17.67	19.47	25.87	22.15
		15.73	17.72	14.69	19.79	21.65	13.53	15.4	26.95	16.76	14.06	17.87	17.33	23.05	16.01
		19.93	29.63	16.91	20.5	17.33	14.84	17.16	15.87	20.34	18.04	18.22	20.04	20.1	20.59
		18.39	19.04	14.02	19.48	23.23	16.79	17.35	18.95	21.37	20.04	25.05	21.64	18.97	21.32
		24.16	20.81	13.46	22.62	19.98	15.65	23.51	20.2	20.12	13.55	17.87	21.48	22.59	20.26
		15.14	13.8	17.28	18.18	16.69	15.49	15.87	20.26	20.91	18.93	24.43	18.7	19.43	20.53
		21.95	20.82	16.15	19.74	21.35	12.25	15.02	23.81	25.12	15.55	17.67	22	18.14	23.7
		18.21	19.78	18.93	17.94	17.8	13.66	15.89	21.73	22.81	14.06	16.46	17.77	17.23	19.97
		21.13	18.92	16.01	19.9	19.28	21.5	14.36	17.57	22.04	20.54	17.89	25.97	15.2	27.43
		15.51	12.69	17.96	17.64	16.9	13.28	13.63	22.98	26.41	14.65	15.73	21.96	15.6	25.33
		16.66	12.64	16.98	23.4	20.58	13.02	17.86	25.16		18.68	23.57	18.61	17.52
		19.89	21.42	18.46	17.95	14.6	14.67	14.89	31.25	43.66	17.32	22.41	23.68	16.89	27.19
		20.26	19.19	17.42	20.52	24.12	11.07	18.81	27.07	27.39	16.3	16.7	21.22	21.73	17.72
		17.7	18.43	17.17	18.6	18.79	18.59	16.32	22.59	24.3	23.73	27.18	21.31	17.85	18.8
		19.05	14.7	17.6	22.45	17.24	13.81	14.14	23.57	20.82	19.1	19.95	23.41	20.94	21.27
		15.42	18.16	18.23	18.86	24.94	16.59	13.18	27.78	19.2	17.21	17.48	18.51	18.25	21.37
		17.9	18.42	15.73	21.52	18.51	13.59	16.07	27.48	28.94	14.48	19.47	20.96	20.06	18.77
		24.72	18.57	20.07	19.34	22.52	15.18	14.66		21.22	19.79	21.47	23.62	10.99	20.9
			17.82	18.72	18.83	27.32	12.67	16	28.48	18.25	13.9	17.67	20.42	20.86	16.59
		26.35	20.62	16.86	22.01	16.78	10.6	20.55	20.64	21.17	15.44	25.7	24.24	11.81	15.94
		18.94	24.35	17.13	21.59	19.82	13.03	15.91	23.54	21.49	14.92	17.2	19.33	13.77	17.86
		18.53	19.32	15.36	17.04	17.03	13.98	15.96	32.44	26.53	14.58	21.81	17.7	15.09	16.95
		18.32	16.69	21.12	18.8	22.3	15.04	16.15	34.64	23.15	17.72	25.86	19.32	11.49	17.15
		17.74	16.11	16.38	18.39	20.67	17.92	17.04	34.31	18.9	14.29	21.91	19.59	10.03	12.53
		16.69	17.51	15.34	23.5		11.43	17.32	21.74	18.97	13.94	18.15	21.73	17.92	14.58
		20.48	19.5	19.38	19.06	29.3	12.99	17.7	20.74	26.66	14.45	23.66	20.26	22.76	17.38
		22.78	18.42	16.64	19.23	21.78	14.63	16.13	21.85	19.92	14.42	16.62	18.09	19.06	12.18
		20.43	18.79	25.78	23.63	22.31	17.2	19.51	18.87	16.99	15.82	20.99	18.68	11.51	13.43
		18.04	20.18	15.02	21.18	18.85	12.05	19.06	25.93	19.75	13.54	24.23	19.52	15.34	13.91
		18.49	19.93	18.83	22.46	16.49	12.87	14.37	21.79	17.83	13.95	17.71	19.73	19.26	13.89
		15.63	20.81	16.86	18.38	20.88	16.4	15.66	21.86	21.36	15.79	21.07	22.42	19.24	14.11
		17.12	18.69	14.72	20.05	24.26	12.05	17.17	21.58	24.73	19.41	23.55	20.53	13.59	15.9
		17.17	13.59	19.9	21.31	15.38	14.74	17.58	23.43	15.25	16.42	20.61	18.88	21.98	17.38
		14.9	18.97	17.32	23.69	34.1	10.81	15.55	25.3	16.68	15.57	20.73	19.16	19.7	17.73
		16.73	19.17	14.81	22.96	15.54	23.09	18.97	26.91	15.99	16.07	17.93	20.9	15.81	12.37
		15.5	12.28	15.52	20.59	20.1	18.77	16.27	26.06	20.36	15.64	25.73	17.63	19.49	12.62
		19.5	18.31	14.3	18.72	19.68	12.49	14.09	23.86	14.1	13.29	21.74	15.88	17.27	15.64
		16.16	18.32	13.39	20.59	19.11	15.21	15.43	25.14	20.3	14.78	23.31	16.92	17.55	17.65
		19.71	11.07	16.19	19.89	24.41	10.67	14.84	20.11	22	12.88	23.79	18.23	20.67	15.31
		17.25	14.29	13.85	23.37	18.96	20.67	16.25	22.38	21.11	16.33	21.47	16.06	21.51	13.81
		14.77	14.67	13.71	22.94	19.69	10.36	17.98	21.1	21.4	13.14	19.08	18.39	21.02	14.54
		15.94	21.88	16.6	21.58	31.16	15.37	14.76	24.95	22.47	18.24	22.14	21.34	20.2	23.16
		15.05	19.29	17.68	20.58	20.21	12.35	18.44	24.69	18.1	15.3	26.72	15.73	19.31	17.83
		14.54	17.8	16.94	21.84	20.28	15.72	16.52	27.2	16.42	17.51	21.66	18.9	22.28	14.56
		15.28	18.67	16.14	23.16	20.37	16.52	15.57	20.32	17.03	14.74	19.95	16.82	16.43	16.65
		17.68	14.33	22.28	29.47	23.39	17	13.34	18.08	18.79	19.18	19.42	15.06	19.15	16.18
		17.18	17.53	14.36	23.51	19.12	13.55	20.82	27.24	23.22	14.16	23.84	20.63	21.34	17.34
		14.3	18.61	18.58	21.8	26.87	17.07	17.1	22.12	19.37	16.05	20.77	15.81	17.09	18.48
		15.86	18.01	28.55	19.74	20.59	22.99	15.52	20.85	17.1		21.06	18.23	21.93	16.09
		16.94	15.02	15.72	23.21	24.27	16.63	14.26	21.54	19.41	24.09	20.35	18.15	19.72	16.86
		18.38	16.85	16.55	21.21	19.19	17.49	15.07	22.24	20.02	20.42	21.13	16.45	17.53	23.9
		16.67	16.75	15.69	19.1	20.46	18.94	15.96	20.9	18.3	17.42	24.26	17.33	20.03	15.05
		13.6	18.64	17.65	21.45	19.79	15.9	15.9	18.32	16.88	13.56	24.74	16.11	18.57	13.5
		15.9	16.9	17.93	23.18	19.02	21.16	16.43	22.41	19.36	13.77	21.85	22.49	19.62	17.61
		14.74	17.58	15.09	20.08	20.64	17.57	17.37	20.96	19.22	14.93	21.5	18.07	18.11	16.08
		16.58	17.67	16.33	23.04	19.6	17.96	15.74	20.36	16.15	23.17	19.56	16.23	19.1	16.45
		14.32	20.27	16.83	22.92	19.31	16.6	17.23	22.18	22.1	15.43	20.49	17.64	16.76	14.98
		14.8	17.38	16.77	24.92	24.03	17.19	17.02	26.08	20.64	15.33	21.98	19.88	22.6	13.14
		16.35	15.98	18.4	23.89	18.46	13.78	15.58	20.22	22.56	33.81	21.07	18.63	18.42	15.59
		13.75	15.58	17.28	28.52	28.67	15.7	15.48	21.79	14.94	19.74	22.56	19.62	17.5	15.69
		12.93	18.46	17.04	20.46	18.05	17.55	20.05	19.09	22.3	22.36	20.04	17.64	19.64	20.87
		17.1	17.46	14.75	17.51	15.51	14.03	16.18	21.57	17.34	12.86	19.91	27.68	21.64	15.56
		17.19	15.77	19.94	19.88	21.09	19.39	17.48	22.13	17.78	17.93	20.85	19.21	20.7	13.3
		18.05	17.07	16.8	20.38	17.43	16.15	17.25	22.32	25.5	16.38	21.14	19.61	21.92	17.56
		17.11	17.22	25.98	23.24	22.12	19.87	15.95	28.7	18.71	14.41	23.45	21.25	16.2	17.74
		16.4	17.74	21.27	22.16	21.1	19.32	18.33	19.9	21.29	16.84	19.59	19.25	22.07	16.18
		17.57	16.59	17.41	21.95	24.66	20.01	15.17	22	16.61	15.92	19.25	18.18	14.79	16.89
		15.92	16.08	15.42	23.16	17.93	19.23	20.05	21.92	16.26	15.32	19.66	20.94	15.95	14.21
		17.19	19.55	16.46	21.63	22.43	15.87	16.74	20.87	21.76	17.44	21.25	19.75	16.55	16.04
		19.78	15.96	15.47	28.03	19.93	19.99	16.74	18.68	23.01	15.69	23.34	20.59	14.22	14.3
		15.08	19.22	17.91	26.38	19.73	22.31	16.84	23.5	23.19	16.95	20.11	18.44	19.48	22.97
		17.96	16.19	13.75	29.84	22.06	21.08	20.76	24.83	23.39	18.84	19.5	19.88	16.2	14.47
		18.87	22.9	19.44	32.86	23.07	14.73	17.81	22.98	22.24	16.59	19.4	19.44	17.72	13.97
		17.63	16.99	12.57	26.73	22.5	16.04	15.19	16.81	20.78	15.58	19.35	22.1	18.48	14.61
		15.78	20.02	16.27	28.92	21.63	19.74	21.35	20.61	21.09	14.92	20.36	20.79	20.81	14.04
		20.69	19.04	16.12		24.12	18.81	18.25	22.48	23.81	19.64	19.51	21.24	15.28	16.69
		16.79	13.18	18.41	31.42	22.34	17.96	14.56	17.7	19.09	15.19	21.17	19.36	12.4	15.97
		16.77	18.17	14.48	22.73	23.57	21.35	15.69	20.6	22.94	14.79	20.07	21.08	16.32	15.15
		16.33	19.33	27.83	19.53	24.82	19.49	19.52	21.86	17.17	22.53	25.85	20.48	13.8	18.52
		15.52	16.06	12.86	20.95	23.03	20.34	16.42	22.47	23.65	17.66	21	20.93	18.34	18.21
		17.16	16.67	24.59	20.02	20.1	18.95	18.49	22.46	18.92	19.16	30.12	26.22	16.31	18.16
		20.93	13.48	14.07	20.22	22.49	16.02	16.81	21.09	15.46	15.64	18.95	21.64	13.49	16.89
		18.71	16.27	13.28	21.8	22.95	16.38	21.9	25.54	19.88	15.83	18.5	17.85	22.69	16.32
		20.55	19.55	16.86	22.88	20.66	15.35	16.28	19.07	19.15	16.01	23.02	19.84	18.05	15.19
		14.48	24.79	17.71	18.18	19.48	17.29	18.95	22.01	16.19	18.97	25.73	15.99	11.41	15.6
		18.56	13.7	20.24	20.08	23.24	18.18	21.58	21.8	18.65	20.59	21.26	20.12	16.78	14.26
		13.66	17.68	18.34	18.4	24.93	19.26	26.83	21.03	18.56	21.02	21.85	20.82	17.61	15.08
		24.95	17.24	16.09	28.2	22.57	16.92	23.61	20.2	16.37	14.98	20.42	19.16	13.95	17.69
		14.24	18.89	20.53	16.55	26.18	14.28	30.67	19.41	18.99	16.42	21.04	18.65	13.11	14.92
		17.84	17.88	19.87	16.88	25.42	16.55	21.48	20.59	15.66	15.81		24.35	16.89	16.27
		16.98	16.53	15.96	18.52	24.57	14.71	24.66	22.52	24.09	16.85	24.2	16.11	14.54	13.05
		13.01	16.44	18.6	21.32	19.33	14.17		22.98	14.17	22.76	23.29	14.45	11.86	16.27
		15.03	16.08	19.48	15.35	22.76	14.37	20.88	20.26	20.79	17.07	22.18	15.24	17.02	17.92
		22.33	16.7	17.2	19.21	23.97	13.45	21.4	24.67	16.9	16.17	28.9	14.14	20.13	16.81
		18.73	20.35	27.41	15.4	16.93	13.03	22.61	23.03	15.01	16.33	23.86	18.56	14.44	21.07
		15.33	16.7	20.96	19.57	21.08	14.97	20.13	20.11	13.5	15.74	19.67	17.47	16.79	16.96
		10.99	16.95	16.52	21.83	21.75	17.64	19.7	22.11	14.45	16.84	25.32	14.73	13.62	13.48
		13.41	18.74	18.81	16.71	20.01	14.77	18.29	19.8	16.98	16.57	18.67	16.3	19.85	14.27
		11.69	18.13	18.7	14.35	20.63	14.03	20.95	21.27	19.93	18.54	18.33	17.4	16.43	13.96
		23.68	27.57	22.09	21.59	20.45	13.97	21.36	20.58	14.92	17.16	21.32	16.82	12.79	13.43
		20.76	16.19	17.53	18.88	22.77	20.6	14.3	26.64	19.39	13.62	18.21	16.35	17.54	15.54
		14.98	18.27	19.25	21.01	21.66	15.43	16.8	19.7	20.61	17.38	22.27	18.19	15.03	14.2
		16.8	16.7	18.34	24.98	19.97	13.59	15.96	19.06	19.87	16.27	19.46	16.42	17.87	21.58
		9.92	17.95	15.17	14.12	19.18	14.8	17.2	23.32	11.97	15.72	17.63	22.03	14.79	18.85
		9.73	14.8	17.52	17.09	20.47	14.15	18.49	21.66	14.83	17.71	14.67	16.54	19.31	14.36
		19.95	15.08	23.19	20.65	18.88	13.66	20.49	24.63	18.39	18.82	20.48	15.14	14.44	19.81
		13.06	17.24	19.2	21.53	19.6	13.16	17.79	22.52	21.33	20.48	14.86	18.16	14.28	17.96
		11.23	22.04	21.1	14.7	20.33	15.65	15.02	22.7	12.56	16.13	20.34	15.04	15.36	17.96
		16.47	19.13	20.63	16.68	22.12	15.75	13.11	20.6	14.45	16.15	23.86	24.6	16.03	19
		14.2	25.14	18.96	24.93	23.84	12.96	18.38	22.23	16.47	18.68	19.03	17.44	18.85	19.7
		11.19	16.95	17.98	21.24	24.75	18.41	17.55	18.63	19.79	15.22	21.03	19.56	20.02	22.67
		17.55	14.79	17.69	22.49	20.07	12.8	18.72	20.36	13.76	16.14	16.58	20.17	21.41	18.59
		20.43	15.35	21.8	25.72	27.15	13.65	16.36	17.42	12.78	17.2	20.88	19.35	20.48	18.24
		13.19	14.96	16.34	16.63	19.65	12.26	19.77	23.01	12.54	19.75	18.24	23.07	17.13	23.33
		17.47	17.29	19.19	16.77	22.65	14.18	14.55	18.57	15.2	17.14	18.6	19.2	17.33	20.03
		18.82	13.99	21.1	23.65	15.67	14.03	19.88	38.26	18.55	21.54	22.1		16.07	16.3
		11.97	18.82	21.48	19.5	25.95	15.34	17.78	33.28	21.77	18.31	19.52	19.97	18.54	13.99
		17.69	18.63	23.62	23.92	16.49	13.21	20.39	30.67	13.33	15.53	19.32	15.29	18.74	15.72
		15.39	14.19	22.15	17.84	31.32	15.46	17.06	25.04	19.27	17.59	20.37	19.22	18.71	19.51
		16.2	16.89	26.19	21.28	15.25	15.11	19.36	20.61	19.73	17.16	19.29	20.5	23.02	17.96
		13.24	16.59	21.89	22.63	13.64	14.9	16.82	24.45	18.23	18.5	18.43	17.52	19.77	14.66
		15.95	18.89	19	24.28	21.32	23.04	20.73		24.28	13.54	19.56	15.57	18.88	17.79
		16.61	15.52	25.85	24.76	12.6	14.97	21.4	23.32	17.22	11.77	24.8	14.88	17.98	19.18
		16.68	13.94	20.23	20.44	23.85	18.01	17.2	22.13	15.23	18.92	18.12	21.18	19.03	19.43
		13.94	15.95	19.95	19.22	21.94	18.27	21.42	19.23	14.15	19.09	21.3	16.09	18.24	17.98
		15.65	14.53		23.47	15.86	14.95	16.53	19.26	15.73	23.62	18.33	17.12	17.88	18.2
		15.31	13.32	26.33	21.68	23.43	16.76	25.86	19.94	14.25	17.74	20.19	18.84	20.95	17.6
		14.69	13.27	22.55	20.75	31.06	16.01	17.3	15.91	18.49	18.36	20.81	27.77	17.09	16.52
		15.55	16.92	21.07	25.9	36.93	17.94	17.17	21.42	15.76	19.13	16.89	16.42	20.21	16.48
		16.14	17.77	22.74	20.85	18.61	20.99	16.94	16.59	21.62	15.81	19.57	18.31	18.7	20.5
		13.86	15.32	19.02	20.64	22.92	14.05	24.43	19.21	14.62	12.27	21.6	16.02	19.81	14.58
		16.9	16.65	19.41	18.95	26.18	19.04	17.43	17.08	17.18	10.66	18.48	13.76	22.42	18.52
		17.11	18.79	16.3	25.36	22.86	15.03	23.67	15.68	19.26	10.58	22.31	14.05	25.83	17.25
		15.77	14.51	17.45	21.02		17.68	19.28	15.34	19.88	21.69	18.53	17.24	24.81	14.36
		15.33	15.9	17.35	18.09	35.11	16.88	17.86	18.7	16.17	12.57	17.29	14.68	22.03	16.71
		14.33	15.86	18.33	20.35	27	19.26	16.95	17.62	13.57	16.65	16.42	17.1	31.52	17.19
		15.84	16.87	14.28	17.93	26.16	19.13	20.99	24.08	18.98	16.59	16.89	15.81	21.39	14.08
		16.9	15.3	13.19	20.16	30.72	17.46	19.4	17.13	13.65	12.74	18.61	18.76	26.89	15.37
		16.16	14.99	17.64	19.78	36.8	18.89	16.56	15.86	21.4	16.07	19.5	19.39	23.91	13.74
		14.6	16.16	15.5	19.85	28.62	15.12	30.41	17.1	19.07	17.72	18.56	18.17	25.55	16.5
		14.97	15.82	13.52	18.75	26.46	19.76	24.47	17.39	16.57	13.23	15.73	18.58		16.65
		18.06	16.08	16.19	16.05	23.37	14.84	17.3	17.44	24.61	20.36	17.39	18.56	23.83	15.15
		16.53	15.93	13.71	23.18	21.59	33.44	22.26	16.82	22.23	15.88	17.13	18.7	17.66	13.41
		14.56	14.52	13.43	24.02	25.7	18.51	27.64	16.17	16.14	14.16	21.16	21.36	19.89	18.2
		16.29	19.49	18.72	16.25	22.26	16.2	16.85	22.55	19.51	22.01	15.72	19.32	21.62	13.94
		14.33	16.23	19.45	16.86	27.38	27.54	19.04	23.23	31.12	13.95	21.25	19.76	18.9	14.87
		15.03	16.08	12.29	20.26	21.93	29.36	29.25	18.85		12.05	18.37	21.76	19.25	14.77
		15.73	22.39	18.78	20.89	21.62	19.91	25.91	16.52	22.33	12.2	18.44	16.59	25.75	14.66
		16.88	19.13	14.66	27.78	24.01	25.15	18.29	18.39	21	18.69	15.21	18.99	24.29	15.31
		15.32	16.74	13.72	19.11	23.92		16.71	16.73	20.7	16.49	16.92	18.5	25.95	17.89
		14.11	18.46	18.22	20.7	27.14	28.33	17.23	18.17	20.87	13.78	17.95	17.23	21.31	13.36
		17.7	19.32	15.13	19.52	23.46	24.7	24.37	17.38	23.55	17.71	18.94	19.96	16.63	13.99
		15.48	20.16	13.75	18.53	26.81	17.89	27.32	22.26	20.48	13.18	24.85	18.93	24.23	20.77
		15.72	20.53	23.24	22.15	27.15	18.41	27.3	17.08	20.9	15.04	19.41	19.3	23.11	16.73
		17.44	27.95	15.81	17.96	23.81	18.53	20.36	16.38	17.58	15.02	14.99	17.5	15.99	15.1
		14.44		17.47	20.71	24.15	17.26	26.51	22.66	21.63	18.01	20.07	15.16	21.8	19.19
		15.01	17.94	18.9	18.91	24.55	15.37	23.96	20.58	16.71	15.74	20.62	19.17	17.08	15.7
		15.95	19.16	22.91	17.33	27.25	14.91	19.52	16.35	18.03	17.87	16.81	23.18	18.02	15.85
		14.96	25.75	16.12	19.94	20.39	17.03	23.47	16.52	25.05	14.93	15.92	19.67	18.43	13.78
		16.22	18.57	19.06	18.64	25.14	12.77	27.45	15.8	16.69	16.1	17.13	18.57	16.27	15.94
		13.79	27.71	17.13	19.02	24.62	17.11	23	17.18	18.23	18.21	18.12	17.24	21.59	14.38
		17.12	24.86	23.24	22.16	20.45	17.09	25.67	15.15	18.67	18.91	23.58	18.7	17.74	18.91
		14.72	20.17	18.31	19.88	21.8	16.87	24.81	19.17	17.65	19.69	21.5	23.31	16.64	18.41
		18.39	22.28	14.8	16.36	22.2	15.71	23.63	17.58	16.76	17.33	20.27	16.36	18.39	20.25
		12.65	22.54	16.94	17.29	23.04	29.27	20.49	14.35	16.71	17.43	23.17	19.46	25.6	14.12
		16.18	16.21	17.02	18.53	22.59	14.12	30.6	14.41	17.8	18.69	16.96	24.82	20.39	17.07
		14.82	29.79	29.11	16.41	26.27	15.06	28.13	14.95	16.66	18.53	19.36	16.14	18.8	12.92
		17.84	16.19	18.15	18.71	21.9	20.96	27.28	18.06	19.47	18.1	20.03	19.88	18.35	22.05
		16.57	17.92	16.19	18.25	22.94	13.75	23	14.68	18.97	21	18.07	20.45	20.39	15.78
		13.34	18.71	14.18	23.67	21.88	25.54	22.81	11.93	17.12	18.4	18.74	19.95	20.24	12.15
		13.8	20.24	14.39	19.73	26.68	13.87	23.81	14.95	21.24	15.52	19.9	22.98	19.14	12.87
		13.99	20.41	19.5	21.05	22.87	16.33	28.29	14.12	16.23	15.11	22.62	18	27.02	16.97
		15.96	21.88	14.56	17.4	21.33	18.73	22.16	13.83	17.66	14.17	18.94	20.65	17.82	15.51
		13.55	20.76	16.11	20.55	21.97	13.55	21.62	12.81	16.82	15.15	20	19.32	22.73	17.5
		14.4	19.3	20.41	19.12	21.45	20.53	22.72	24.01	17.32	17.2	20.39	23.3	19.69	18.4
		17.14	20.28	16.11	20.38	18.15	16.59	22.05	14.36	17.24	14.46	19.46	17.91	16.16	18.87
		16.24	20.08	16.41	21.76	22.92	17.99	20.39	17.84	20.12	17.35	15.93	17.75	16.34	19.91
		17.21	22.72	21.32	23.57	22.62	14.52	21.64	14.64	15.99	17.33	26.2	21.69	16.71	19.11
		15.17	17.2	18.16	22.62	20.57	19.13	27.24	13.68	18.39	15.7	20.35	19.18	18.43	16.29
		15.84	20.21	27.82	20.88	20.92	17.13	25.77	14.54	17.44	14.55	22.39	16.61	24.03	23.33
		13.67	20.66	17.59	22.39	18.28	18.56	21.49	19.24	17.72	15.85	16.96	21.33	19.29	25.2
		15.85	26.39	18.19	18.7	17.12	25.16	21.07	13.16	17.46	15.34	21.36	19.62	17.36
		17.8	21.47	17.3	20.83	25.33	21.88	20.02	14.88	16.49	14.87	17.83	21.87	17.11	24.84
		14.12	22.51	21.31	30.64	24.82	16.64	16.91	13.3	16.3	17.08	19.85	25.49	23.33	26.03
		18.25	17.38	16.93	17.34	17.75	18.67	25.67	14.2	16.6	18.41	15.24	23.61	15.46	19.67
		18.21	23.6	20.71	20.14	19.48	15.31	23.35	11.84	16.8	16.44	21.81	20.22	18.44	17.72
		15.56	16.4	21.14	19.61	17.96	19.49	24.09	14.3	17.39	15.7	20.46	21.37	21.74	22
		15.89	24.69	19.67	18.25	17.62	17.23	21.27	11.47	14.14	16.86	23.24	25.42	19.92	22.38
		14.12	22.67	17.73	19.26	21.94	18.71	25.05	13.41	16.15	15.6	15.31	23.11	25.1	18.15
		13.91	19.32	19.11	14.92	20.36	14.67	16.68	15	20.62	14.77	23.95	19.78	17.66	26.84
		15.9	18.69	15.89	22.52	20.68	14.8	19.42	13.72	14.91	16.32	18.53	20.59	15.96	20.17
		14.01	21.01	16.12	20.18	22.52	21.81	20.5	24.2	18.16	13.57	23.26	24.76	16.43	14.15
		13.78	21.37	19.68	39.23	21	19.64	29.96	15.27	15.08	13.7	23.55	21.74	18.18	14.41
		13.4	20.1	19.06	21.92	24.46	19.95	22.03	14.04	18.11	15.69	23.3	21.88	20.92	17.32
		13.49	18.93	18.2	17.51	20.6	17.36	20.07	18.65	18.58	16.91	20.01	18.56	20.23	22.9
		17.24	15.66	16.72	19.68	17.62	23.69	23.84	15.43	16.8	17.9	16.41	21.03	21.22	16.43
		13.09	16.9	18.34	21.75	20.13	17.1	29.25	13.39	11.94	11.72	25.32	18.69	21.5	17.18
		15.17	21.71	15.94	27.76	17.04	16.58	27.12	15.73	18.05	15.48	23.66	21.42	17.38	16.93
		15.24	23.19	14.06	22.14	17.77	22.49	29.23	14.09	23.1	15.34	17.42	19.39	25.67	16.62
		15.57	19.3	16.98	17.95	22.66	17.45	28.06	14.99	13.97	20.04	22.18	19.27	18.79	15.48
		15.41	16.92	14.28		21.22	15.74		15.33	18.5	14.75	16.39	25.03	18.7	20.21
		16.35	14.58	17.05	21.53	20.05	17.95	19.52	23.43	19.08	13.82	14.89	16.74	17.81	13.38
		16	22.75	19.64	20.53	21.61	16.54	19.27	14.07	17.3	15.43	27.11	24.77	18.67	13.23
		17.01	14	16.51	22.55	21.16	17.96	19.4	16.03	15.25	13.8	16.34	18.19	20.88	15.35
		15.68	20.37	15.57	23.76	22.08	19.31	23.13	16.24	19.81	17.41	22.55	20.21	19	16.4
		16.72	24.34	16.61	23.6	22.02	14.59	23.03	17.77	17	16.37	28.5	21.93	17.75	17.22
		19.78	20.52	16.9	22.27	21.76	17.86	21.5	17.74	16.83	18.89	33.09	19.5	22.18	20.4
		18.81	16.72	19.11	25.81	18.26	17.71	24.9	15.15	15.49	15.79	28.54	20.49	17.04	13.47
		15.42	20.1	15.33	22.1	20.7	20.53	22.28	14.87	16.43	16	13.56	17.95	16.61	14.26
		16.13	20.61	17.32	19.36	26.77	16.96	17.63	14.49	18.02	18.02	17.1	16.88	18.03	14.57
		17.36	19.8	15.45	22.26	20.3	17.68	20.87	20.14	18.14	16.91	15.36	15.73	20.36	20.84
			20.17	14.37	18.66	21.91	14.08	18.44	15.82	18.22	20.72	20.4	17.21	16.99	16.37
		20.88	19.92	14.63	21.26	20.73	20.46	17.88	15.08	17.49	22.08	23.55	16.98	15.02	14.64
		19.72	21.98	16	18.9	26.16	18.11	21.76	19.27	21.32	23.99	35.97	18.13	22.17	15.52
		19.83	23.4	16.43	18.25	22.24	19.34	18.73	18.55	17.64	17.71	16.71	22.86	18.2	15.68
		23.61	20.23	15.95	18.58	19.95	15.74	21.29	20.78	15.92	22.65		17.22	22.69	14.03
		21.61	18.8	17.97	16.86	24.55	18.26	17.22	15.32	21.94	17.84	34.14	23.29	15.58	15.31
		20.49	20.18	15.24	13.88	22.72	21.54	16.48	17.65	15.91		26.81	16.8	18.1	15.17
		17.55	18.71	16.57	20.05	19.23	18.27	17.77	17.18	19.78	23.02	24.24	19.18	15.82	17.99
		21.64	21.06	16.76	20.66	23.24	16.46	16.26	17.92	16.03	21.49	25.1	14.95	21.86	16.16
		21.07	19.1	14.91	23.5	22.76	16.19	18.15	16.22	17	24.03	28.2	14.6	15.45	19.77
		16.54	19.36	15.81	16.63	18.32	18.62	15.31	13.41	23.52	20.42	22	20.41	15.04	16.09
		15.78	17.73	18.04	16.69	22.16	17.74	17.69	17.37	16.46	24.11	34.35	17.52	14.54	18.17
		17.74	19.96	16.9	18.13	21.36	16.55	14.88	19.79	19.35	20	25.34	19.92	22.42	13.89
		16.89	20.05	15.9	21.01	22.28	15.47	17.77	21.93	18.51	19.96	20.61	20.56	19.71	15.5
		17.03	18.21	16.48	21.48	24.64	16.13	15.22	15.61	20.1	17.92	22	20.88	13.91	14.7
		22.76	18.52	19.93	20.07	22.54	17.59	17.43	15.27	20.29	17.63	22.79	16.49	17.11	19.21
		14.95	20.58	16.24	23.09	21.55	16.22	18.47	15.04	17.21	19.88	25.16	16.38	14.27	19.72
		17.25	17.9	13.76	19.5	27.76	17.15	16.65	16.79	18.91	19.4	24.4	17.54	17.81	13.53
		17.53	20.23	15.41	19.81	29.3	17.62	14.19	16.03	18.92	14.88	22.8	17.96	20.48	16.94
		18.47	17.09	16.51	18.85	29.49	16.87	14.46	13.07	17.23	15.17	21.7	19.51	14.07	20.62
		16.09	18.9	22.81	20.61	24.29	17.33	16.39	17.51	20.46	18.73	24.07	16.2	15.15	17.55
		19.61	26.1	17.01	18.86	22.91	18.25	16.3	15.65	18.21	14.42	21.64	17.87	16.89	16.12
		16.19	19.55	13.17	20.4	26.9	13.06	17.96	14.87	17.65	15.1	26.15	18.69	13.63	18.73
		16.22	20.84	16.77	16.38		14.05	15.99	18.87	24.07	18.44	19.49	20.01	13.92	16.88
		19.33	18.76	16.26	22.69	33.44	16.17	18.74	14.91	16.05	19.42	20.39	21.47	16.24	15.18
		16.28	20.22	17.08	23.63	27.64	14.41	17.17	18.23	17.74	18.61	26.73	15.48	18.51	13.26
		17.59	18.37	16.89	18.79	25.09	18.04	15.94	15.93	18.56	16.42	21.31	22.18	27.4	24.1
		15.59	20.8	12.27	19.83	21.94	16.63	16.42	21.27	20.33	18.96	16.61	14.43	16.21	19.9
		16.03	17.83	13.53	24.19	23.02	13.68	14.57	16.12	18.53	16.91	20.24	22.59	18.43	16.07
		18.07	18.07	17.94	17.81	21.56	13.9	15.25	14.96	20.13	15.38	17.67	18.05	18.48	14.4
		16.83	22.88	19.66	21	24.88	17.05	17.37	17.07	21.26	14.73	25.87	18.19	18.44	15.86
		16.9	19.52	17.42	17.55	19.1	16.15	16.7	17.24	19.07	16.05	20.69	23.27	18.11	18.24
		18.37	18.3	25.55	18.27	19.52	14.78	17.55	15.73	16.49	17.84	22.06	18.21	21.6	19.27
		15.39	18.7	18.47	20.22	20.31	15.67	18.89	20.32	19.95	15.7	16.08	17.5	19.98	18.06
		20.4	19.5	17.17	25.2	21.63	13.84	16.71	15.52	17.92	14.25	20.64	18.28	18.81	14.09
		16.74	20.02	14.03	19.37	16.43	15.39	14.83	16.8	19.54	17.81	23.03	16.61	19.93	12.96
		19.45	17.97	14.59	18.71	21.38	12.99	16.71	17.94	17.53	23.07	16.83	28.88	19.78	14.06
		15.31	21.54	20.28	18	24.2	15.35	17.5	16.86	19.91	17.85	22.45	18.64	21.26	14.48
		17.69	24.26	16.48	19.06	25.07	16.22	16.27	17.67	19.06	15.79	20.58	22.7	20.95	15.7
		16.52	17.01	19.15	17.37	18.97	19.47	19.17	16.98	22.06	15.7	19.17		26.76	15.81
		17.33	19.69	18.31	14.63	19.53	15.14	20.64	18.13	20.31	17.05	25.03	22.82	18.2	16.98
		17.41	16.64	19.2	22.64	17.07	14.92	20.89	18.23	17.48	18.13	18.02	19.96	20.67	14.1
		17.21	19.36	20.45	21.28	21.08	18.98	19.03	16.73	18.34	14.45	19.88	20.76	22.99	18.42
		14.94	15.76	20.77	18.79	20.06	14.45	21.08	18.7	23.82	13.89	22.01	20.62	22.08	18.52
		18.52	19.08	24.68	14.34	20.4	16.46	21.56	16.11	18	19.53	24.69	17.2	17.3	16.51
		17.1	16.32	18.74	15.18	16.92	16.66	20.79	14.74	18.81	16.01	17.91	17.72	22.05	14.09
		15.64	18.87	17.98	19.59	19.88	13.99	22.2	17.85	18.54	19.65	20.74	24.76	24.92	14.76
		16.95	22.15	17.79	16.78	18.68	17.02	20.23	25.94	18.69	19.71	24.4	17.97	32.43	14.98
		24.47	16.78	18.5	18.48	16.1	16.99	21.05	20.34	17.55	16.59	21.63	21.14	18.45	17.08
		15.77	16.16	18.93	19.15	22.86	15.53	23.82	19.28	18.96	16.57	22.92	14.34	18.76	15.89
		21.97	18.62	17.43	19.38	17.38	12.28	18.01	15.24	18.08	15.57	22.19	20.6	21.5	14.7
		17.27	15.23	16.66	17.14	22.31	14.08	18.63	16.5	19.64	17.22	24.32	17.81	18.39	16.65
		16.23	18	19.59	16.09	25.04	16.15	23.29	18.21	18.25	16.86	22.14	17.84	19.65	17.25
		17.18	18.94	14.91	16.79	18.94	14.37	17.53	18.97	19.12	20.31	22.39	20.88	23.47	17.56
		20.68	21.24	19.82	17.67	21.79	19.71	22.44	18.84	20.42	14.77	26.38	13.98	22.17	13.32
		18.68	17.88	19.59	17.8	21.14	16.25	23.35	12.88	17.12	17.68	21.93	17.78	36.09	16.21
		18.92	15.64	14.56	17.67	19.84	24.73	18.8	19.86	18.06	19.12	22.63	14.66	33.55	17.54
		19.16	18.03	15.4	18.56	17.77	13.73	16.79	12.46	19.19	13.05	24.51	19.45	20.84	14.2
		15.66	19.1	12.51	24.03	18.27	16.98	14.93	19.51	16.08	17.23	23.76	19.64	24.28	19.17
		16.42	18.49	12.43	21.24	19.16	20.06	22.63	19.16	23.62	25.7	23.56	16.22		15.95
		21.47	17.66	15.46	22.05	21.93	17.4	14.63	23.51	16.26	14.47	20.32	21.12	18.86	18.1
		16.8	17.96	15.68	17.29	24.96	21.6	14.83	18.79	18.29	12.08	26.16	14.87	22.3	15.85
		14.61	16.99	21.16	20.9	21.81	17.78	19.33	14.22	17.93	17.54	19.42	15.73	24.34	16.32
		15.03	19.16	15.77	20.74	23.18	18.43	30.01	10.29	19.37	12.23	22.01	19.34	24.63	15.22
		17.84	20.07	12.58	13.96	21.66	18.98	14.84	9.89	15.29	16.03	21.16	15.79	17.1	20.09
		15.15	17.56	18.81	19.57	22.45	18.02	17.42	20.68	18.17	16.49	23.9	18.6	22.25	17.44
		18.12	18.04	17.08	15.6	21.87	17.35	20.36	20.02	16.34	19.98	19.28	19.04	18.05	17.73
		16.84	23.27	22.32	16.47	26.86	17.53	19.99	15.55	17.43	18.4	24.01	16.27	27.59	16.33
		19.02	21.94	15.09	14.67	22.46	17.6	21.3	9.73	20.72	17.17	23.46	14.48	18.48	17.09
		16.13	19.87	18.75	18.67	23.41	17.83	21.45	22.67	18.41	14.44	19.99	21.79	16.49	20.26
		17	25.44	14.1	21.97	18.51	20.09	19.92	25.14	17.3	15.87	23.52	14.94	20.17	14.18
		16.35	20.77	31.14	21.05	21.07	19.9	19.86	30.94	22.78	15.26	18.44	17.25	17.4	17.43
		19.25	24.22		19.83	26.17	17.56	17.91	13.84	15.52	14.94	17.33	18.74	19.42	16.32
		17.18	19.66	24.83	26.92	19.13	17.28	18.17	23.76	13.88	16.49	25.98	15.25	22.48	16.08
		15.13	18.5	25.22	20.31	20.1	19.15	20.97	13.15	20.62	15.62	25.28	16.39	22.48	16.17
		15.37		23.89	18.08	26.35	16.24	18.95	27.69	22.75	13.71	21.77	18.43	19.4	19.67
		17.49	33.12	19.4	22.45	23.93	16.84	21.31		25.36	15.51	19.39	19.04	18.39	14.76
		21.7	28.98	18.91	18.57	23.31	20.67	16.02	20.04	22.93	15.82	25.18	18.62	20.51	14.29
		14.14	23.66	18.59	22.7	23.53	17.3	19.68	18.57	23.85	20.92	22.37	23.29	16.55	21.63
		14.58	27.43	18.03	19.78	24.96	20.53	19.6	20.68	17.55	21.65	17.57	15.9	21.58	14.14
		14.65	29.15	18.33	18.97	24.62	17.2	17.61	23.04	23.81	13.02	19.17	17.72	20.43	15.48
		17.82	34.64	22.81	22.69	30.58	21.66	20.54	22.69	18.41	16.41	28.15	16.14	20.13	16.04
		16.72	25.86	20.5	19.08	25.08	15.3	19	21.39	25.55	16.79	24.22	17.96	20.67	17.18
		14.9	25.05	17.48	18.07	23.99	19.12	21.48	16.29		16.43	18.81	20.97	18.43	14.27
		16.06	23.15	21.99	19.79	26.16	19.64	15	22.73	24.33	13.56	21.19	19.99	18.63	13.82
		15.87	20.24	21.34	23.68	28.7	14.43	15.92	19.77	20.26	18.55	25.5	21.01	19.55	16.37
		14.85	29.83	28.13	17.6	28.94	21.61	17.19	26.58	21.36	14.61	18.94	18.7	18.91	28.93
		15.27	29.35	17.19	18.66	21.48	17.79	15.7	23.8	25.3	16.23	27.33	19.76	16.64	17.74
		17.07	20.76	17.46	21.78	27.93	21.06	20.38	19.94	23.64	16.33	21.84	22.14	17.62	14.23
		16.68	23.57	17.37	19.47	26	19.77	16.19	16.16	19.6	19.45	22.33	17.59	17.99	13.29
		18.78	22.46	19.59	18.93	21.5	20.01	26.5	16.2	20.28	15.72	23.49	19.95	20.14	16.67
		16.52	20.11	20.64	16.25	24.87	13.67	17.85	20.33	24.12	17.46	28.63	22.29	22.26	12.35
		18.87	19.23	20.2	17.96	27	15.55	15.53	17.23	22.69	14.51	21.62	19.7	20.68	17.13
		18.95	18.25	21.63	19.92	21.9	27.55	20.39	20.98	25.21	17.34	22.4	18.94	20.77	14.93
		15.31	29.87	19.67	19.41	19.95	15.19	17.64	20.73	18.51	18.4	21.82	19.65	21.56	16.73
		16.99	20.97	16.32	21.83	34.25	20.94	18.37	18.36	22.47	13.6	23.69	19.31	18.16	14.2
		13.91	23.92	17.42	19.92	24.43	22.51	16.24	17.12	22.07	16.9	22.66	20.72	18.58	13.85
		17.05	19.15	15.75	16.57	21.85	20.36	18.19	15.42	19.76	20.61	21.55	20.85	19.03	15.5
		17.21	17.74	20.67	18.92	22.43		12.7	17.01	19.29	15.3	24.59	24.7	19.57	14.83
		21.19	16.61	23.1	17.17	28.55	25.78	15.67	14.41	28.5	14.37	24.51	23.92	19.85	15.94
		14.67	23.05	20.11	18.98	24.51	28.24	13.91	19.47	18.77	18.49	24.02	21.83	19.1	16.1
		17.11	19.65	16.29	17.05	24.75	17.79	16.62	21.99	20.37	15.89	24.67	24.63	23.14	17.19
		14.96	21.3	18.99	15.51	21.26	21.71	15.46	14.63	20.53	14.18	24.13	20.66	18.2	19.93
		17.18	17.67	14.98	21.38	21.19	18.94	14.32	15.33	20.12	12.22	26.59	21.95	15.57	17.84
		18.72	16.08	21.68	19.74	30.91	17.79	17.66	15.19	20.68	17.09	29.48	17.12	21.34	12.24
		18.95	27.14	17.91	16.58	24.49	25.06	14.97	14.74	19.32	16.45	25.7	20.36	21.77	15.91
		17.91	20.79	16.85	16.47	20.91	21.34	18	18.35	20.36	13.68	31.09	21.41	19.52	16.36
		17.63	18.89	18.2	19.33	20.48	18.09	27.67	18.54	20.41	14.67	27.74	23.52	18.34	17.18
		14.02	16.79	19.36	16.75	22.7	17.22	15.56	14.86	26.57	18.4	29.27	19.26	15.44	18.45
		15.43	20.6	15.12	18.08	21.98	17.33	17.35	17.94	19.15	12.23	30.93	18.47	15.07	12.45
		18.13	18.48	19.35	20.18	21.22	15.25	22.34	15.12	20.7	16.01		17.65	21.34	30.43
		18.68	17.19	20.82	17.65	24.15	17.84	16.18	18.43	21.45	11.62	25.34	17.67	18.58	18.62
		17.12	15.64	14.74	23.18	23.87	19.46	20.09	20.7	21.66	14.88	21.9	22.58	18.93	17.37
		17.65	23.63	18.02	15.91	27.2	18.9	18.85	15.51	18.5	15.36	19.44	15.25	16.65	14.48
		16.77	16.74	16.15	17.19	20.8	19.48	23.68	16.79	16.48	15.01	19.9	16.2	16.19	20.13
		18.05	20.76	15.02	16.47	22.51	16.35	21.69	19.38	19.09	14.97	29.04	19.02	18.76	12.46
		19.38	19.41	20.58	16.22	32.36	16.52	16.93	17.65	18.76	12.02	19.02	17.76	14.37	18.17
		17.91	16.59	16.38	22.62	21.6	16.62	18.4	16.86	20.46	15.92	20.27	16.64	14.57	16.07
		18.69	18.36	16.1	17.14	19.85	16.31	20.31	17.41	23.9	18.35	22.87	16.07	13.78	14.62
		17.51	18.26	16.27	20.49	22.57	20.38	18.53	18.17	19.77	17.98	16.45	15.55	17	14.63
		17.68	16.39	27.42	23.74	25.49	18.95	21.37	18.1	17.16	22.34	16.51	16.78	17.11	16.28
		15.1	17.66	18.64	17.67	26.42	22.97	32.77	18.25	18.98	14.57	19.02	16.99	14.23	14.17
		17.89	18.32	20.63	17.73	21.66	18.08	26.65	18.49	20.52	15.55	21.07	18.7	22.44	15.08
		15.92	16.22	15.34	20.49	29.38	17.77	20.56	19.18	16.37	12.69	25.26	18.51	22.04	17.91
		18.45	17.63	15.21	21.11	25.13	18.69	18.1	21.04	17.16	14.36	19.84	14.85	16.49	15.74
		16.77	20.25	18.35	23.91	27.29	19.84	21.59	17.58	21.55	19.83	16.77	16.08	18.19	14.55
		16.81	23.03	15.72	19.06		19.5	21.84	18.42	27.67	15.7	16.31	15.24	14.16	15.15
		16.71	20.18	19.35	19.62	29.08	17.23	21.93	21.52	19.4	16.3	17.11	17.52	15.21	17.94
		14.43	17.68	16.65		22.3	19.26	31.66	17.45	18.52	18.13	19.22	17.93	14.54	14.08
		18.96	19.35	17.94	26.04	18.02	19.21	22.35	17.48	22.54	16.46	15.36	14.85	15.34	13.61
		16.45	18.46	21.2	21.96	20.26	18.82	27.58	19.74	18.11	16.84	27.52	15.46	20.04	14.17
		17.64	19.71	19.01	20.14	22.35	25.51	21.33	19.39	17.53	18.73	20.79	21.98	14.98	15.14
		16.4	22.27	17.16	27.32	20.81	21.17		19.19	19.82	18.6	17.08	21.45	17.77	17.95
		16.15	18.36	16.04	23.53	20.72	19.33	27.81	19.34	21.73	17.51	17.42	19.64	18.22	16.77
		18.81	21.89	16.68	26.21	25.05	18.86	25.65	19.09	21.47	17.37	19.94	15.22	18.79	15.58
		20.14	18.29	16.84	21.11	23.24	20.68	25.28	20.95	17.41	19.13	21.56	20.58	17.06	17.89
		15.88	18.77	15.23	17.13	17.2	19.88	23.06	20.15	20.1	19.64	20.94	16.01	21.18	16.53
		15.08	20.62	14.99	15.89	19.07	19.15	24.03	18.8	17.49	16.41	18.26	15.95	18.57	27.81
		14.9	18.76	16	20.16	30.63	24.1	25.8	17.58	20.22	19.85	20.45	15.73	16.9	18.28
		15.3	17.53	16.42	17.71	18.79	23.74	32.48	19.04	17.03	17.75	24.41	17.25	20.32	20.54
		15.56	16.98	15.28	17.12	18.32	19.36	26.58	17.26	21.9	20.76	21.28	17.72	19.14	18.94
		19.5	17.12	15.08	18.11	21.16	18.42	19.35	18.21	15.36	14.37	20.22	16.2	16.74	17.22
		17.66	18.26	14.95	18.44	19.9	19.48	22.28	21.21	14.42	15.11	24.5	16.17	17.02	18.09
		15.22	22.49	18.3	18.05	23.1	19.88	21.9	18.3	17.36	26.76	22.04	17.9	15.72	19.13
		14.83	17.93	17.55	18.18	18.13	18.94	21.97	16.22	26.79	21.71	20.36	15.38	19.12	22.31
		16.76	16.84	15.55	20.38	17.98	20.7	28.83	19.36	16.23	28.35	19.68	17.46	16.76
		16.04	17.65	15.5	25.38	20.54	19.55	19.73	16.47	19.48	15.91	31.63	19.48	16.54	24.33
		14.68	15.87	19.95	16.28	20.49	19.53	22.45	19.31	15.03	18	20.93	15.52	19.08	22.46
		14.51	15.76	14.81	21.41	23.23	20.42	21.81	16.82	15.19	16.03	25.2	16.78	15.99	18.85
		16.29	20.31	19.63	21.66	20.69	19.28	22.4	16.74	16.6	16.16	20.48	15.67	16.84	16.98
		17.42	15.87	18.67	19.56	21.23	20.7	19.69	17.14	14.68	20.34	18.2	21.9	14.83	17.44
		14.26	18.2	15.43	15.77	23.12	21.67	22.34	18.28	18.48	15.48	21.26	14.74	16	24.1
		16.3	20.51	15.51	17.16	21.46	22.05	24.11	19.92	18.54	16.63	20.39	17.17	15.36	33.43
		16	15.32	14.9	22.56	27.59	22.93	21.84	17.53	15.43	18.05	19.89	15.46	28.89	22.77
		15.31	17.81	17.11	19.97	20.23	26.97	21.15	16.49	15.55	17.31	18.74	16.12	17.52	13.92
		20.4	17.09	23.03	14.77	21.26	20.17	19.09	18.49	13.98	29.33	20.47	14.03	14.63	12.55
		14.8	14.23	17.24	16.44	23.49	19.86	22.05	18.15	13.69	15.36	19.49	18.85	16.62	14.33
		16.47	18.14	14.72	17.73	28.35	22.21	21.22	17.85	14.33	21.39	16.05	15.5	18.79	22.63
		16.7	15.45	14.28	18.33	22.49	25.91	20.58	18.21	14.2	20.48	24.07	27.55	16.61	12.76
		15.1	19.25	18.67	20.63	24.27	18.27	25.14	15.29	17.21	19.06	24.11	16.16	15.43	16.27
		12.92	13.97	17.76	21.16	19.43	20.46	23.12	15.76	20.5	32.74	17.76	18.99	14.43	14.99
		15.09	17.35	15	22.59	16.16	19.25	18.81	16.84	14.2	19.51	22.84	16.77	16.65	13.14
		16.9	17.12	20.4	25.2	24.62	16.39	28.1	15.59	22.52	19.53	17.73	22.56	20.6	21.24
		17.28	21	18.39	16.64	19.98	21.56	21.57	16.61	15.07	18.55	21.13	22.1	14.39	26.18
		15.27	17.06	16.88	16.57	21.31	22.92	21.53	17.45	16.55	36.62	22.64	15.03	13.28	19.95
		19.52	15.91	13.11	17.22	17.88	25.98	22.31	15.43	16.24	22.92	18.5	18.4	16.43	15.28
		14.74	17.89	24.16	16.12	25.41	19.24	19.51	15.4	15.78		18.67	18.76	16.84	16.17
		20.43	15.14	16	19.77	16.03	23.29	20.12	16.57	19.25	19.17	22.33	18.91	15.21	17.23
		19.24	20.19	15.42	20.49	16.8	19.78	19.97	15.47	13.08	20.88	19.78	15.53	15.49	14.03
		17.44	19.67	15.08	17.4	20.91	22.91	24.03	17.07	15.94	16.23	21.37	17.85	16.94	13.89
		17.93	19.71	19	18.85	21.83	23.46	24.52	14.37	16	15.59	21.12	19.92	14.71	15.87
		16.75	16.31	17.24	24.85	19.11	21.63	23.67	18.24	15.64	19.63	18.45	15.83	16.61	15.18
		20.09	17.61	13.16	20.02	24.78	23.59	25.55	14.23	14.22	18.26	19.64	21.06	21.19	12.88
		18.42	18.49	19.78	15.94	23.71	21.6	20.91	17.08	18.05	16.31	19.88	17.08	15.72	18.6
			21.6	15.89	23.44	22.29	22.24	19.02	19.44	16.24	14.58	26.71	27.33	16.09	18.28
		21.88	15.85	21.09	15.9	20.61	29.57	23.82	15.8	17.6	14.52	20.23	17.47	15.46	14.09
		23.44	16.76	16.54	14.73	19.4	22.49	25.7	15.9	15.81	13.33	21.18	22.09	15.13	13.11
		21.65	16.9	19.64	13.47	22.11	23.26	27.07	17.36	13.85	15.27	19.68	16.28	20.08	19.92
		20.48	15.72	15.69	13.99	21.55	20.41	20.23	16.02	25.42	13.41	20.63	20.21	19.17	10.68
		18.29	19.94	19.35	21.78	18.46	23.51	21.3	17.43	16.68	15.48	25.65	17.57	21.24	14.98
		20.76	19.43	17.82	17.69	22.02	26.06	22.5	14.46	19.65	14.34	20.77	28.16	21.35	17.21
		19.79	15.68	18.95	16.58	17.43	21.13	19.34	18.3	20.94	17.48	22.12	19.94	13.59	13.47
		17.68	21.41	18.9	23.97	22.15	19.54	21.35	16.27	17.18	11.4	19.25	24	17.31	15.14
		17.9	15.66	26.57	14.14	19.07	21.79	17.13	20.79	14.46	13.13	20.04	28.37	13.54	11.92
		20.69	19.78	14.28	18.56	24.94	18.15	21.67	14.22	17.27	14.62	17.78	22.45	20.35	18.18
		20.17	17.06	13.41	22.12	21.83	24.53	15.39	17.97	19.62	12.06	23.22	18.29	16.56	12.55
		17.6	14.57	18.23	20.29	16.83	23.48	23.16	16.06	15.13	14.05	18.32		12.9	24.17
		22.31	19.27	17.1	14.3	21.86	17.72	18.14	15.5	14.61	14.27	23.21	26.5	19.55	19.95
		20.65	16.19	19.24	15.25	20.04	20.32	15.75	15.35	13.17	14.45	21.98	22.2	17.97	16.28
[truncated: 3,412 more rows]

## Sheet: Fig.1 Supplement 2C
Mitotic Cells per 1000 square microns
Figure 1 - Supplement 2B
Collected from 4 Independent Experiments
		Strain Treatment	No Strain	High Strain	No Strain	High Strain	No Strain	High Strain	No Strain	High Strain	No Strain	High Strain	No Strain	High Strain	No Strain	High Strain
		Timepoint	2 Hours	2 Hours	4 Hours	4 Hours	6 Hours	6 Hours	8 Hours	8 Hours	12 Hours	12 Hours	16 Hours	16 Hours	24 Hours	24 Hours
		Average DistToNN	12.8531	11.0574	12.7586	14.1762	10.2069	5.10343	11.0574	10.2069	9.39679	6.80457	11.908	17.0114	18.7126	19.5631
		SEM	4.95784	4.68458	8.37716	6.49016	3.10585	5.10343	5.07975	3.67489	5.15142	1.70114	5.64205	3.67489	5.64205	7.39883
		Replicate 1	13.6091	20.4137	0	9.07276	6.80457	0	6.80457	0	0	3.40229	3.40229	13.6091	10.2069	6.80457
		Replicate 2	0	6.80457	6.80457	0	3.40229	0	0	10.2069	7.77665	10.2069	3.40229	17.0114	10.2069	40.8274
		Replicate 3	24.194	17.0114	37.4251	30.6206	13.6091	0	13.6091	13.6091	*	*	27.2183	27.2183	20.4137	13.6091
		Replicate 4	13.6091	0	6.80457	17.0114	17.0114	20.4137	23.816	17.0114	20.4137	6.80457	13.6091	10.2069	34.0229	17.0114
		Note: * indicates replicate where monolayer was lost due to detachement from substrate during experiment and staining and could therefore not be imaged
