# Supplementary material for: Increasing β-catenin/Wnt3A activity levels drive mechanical strain-induced cell cycle progression through mitosis
Source: eLife journal article supplement (doi:10.7554/elife.19799), 2016-10-26
Supplement: supp [file elife-19799-supp-v1.zip › elife_poa_e19799_Figure_2_source_data_1.xlsx]

## Sheet: Figure 2C
% Cells phospho γH2A.X Positive
Figure 2C
Collected from 3 Independent Experiments
		DMSO	DMSO	MMS	MMS	0% Strain	0% Strain	15% Strain	15% Strain
		# Cells Analyzed	% Cells Positive	# Cells Analyzed	% Cells Positive	# Cells Analyzed	% Cells Positive	# Cells Analyzed	% Cells Positive
	Replicate 1	599	11.6861	583	57.2899	3135	1.75439	2990	5.41806
	Replicate 2	414	6.28019	424	79.4811	1028	2.0428	992	3.42742
	Replicate 3	397	11.8388	476	77.3109	1066	1.87617	969	3.71517
	Average		9.93504		71.3606		1.89112		4.18688
	SEM		1.82796		7.06322		0.0835932		0.621168

## Sheet: Figure 2D
% Cells phospho p53 Positive
Figure 2D
Collected from 3 Independent Experiments
		DMSO	DMSO	MMS	MMS	0% Strain	0% Strain	15% Strain	15% Strain
		# Cells Analyzed	% Cells Positive	# Cells Analyzed	% Cells Positive	# Cells Analyzed	% Cells Positive	# Cells Analyzed	% Cells Positive
	Replicate 1	705	17.5887	697	63.5581	973	0	814	0.982801
	Replicate 2	666	20.5706	728	83.1044	1240	6.53226	1049	10.8675
	Replicate 3	660	27.1212	1067	77.7882	865	0.115607	702	0.569801
	Average		21.7601		74.8169		2.21596		4.14003
	SEM		2.81536		5.83483		2.15841		3.36584

## Sheet: Figure 2F
% Cells phospho p53BP1 Positive
Figure 2F
Collected from 3 Independent Experiments
		DMSO	DMSO	MMS	MMS	0% Strain	0% Strain	15% Strain	15% Strain
		# Cells Analyzed	% Cells Positive	# Cells Analyzed	% Cells Positive	# Cells Analyzed	% Cells Positive	# Cells Analyzed	% Cells Positive
	Replicate 1	519	5.39499	1044	75.4789	1358	5.52283	1312	3.5061
	Replicate 2	702	13.2479	641	77.5351	1112	0.809353	1114	1.0772
	Replicate 3	591	19.4585	718	49.3036	920	3.36957	738	2.16802
	Average		12.7005		67.4392		3.23392		2.25044
	SEM		4.06901		9.0872		1.36235		0.702372
