# Supplementary material for: Increasing β-catenin/Wnt3A activity levels drive mechanical strain-induced cell cycle progression through mitosis
Source: eLife journal article supplement (doi:10.7554/elife.19799), 2016-10-26
Supplement: supp [file elife-19799-supp-v1.zip › elife_poa_e19799_Figure_3_source_data_1.xlsx]

## Sheet: Figure 3B
% Cells TOPdGFP Positive
Figure 3B
Collected from 5 Independent Experiments
		DMSO - 0% Strain		SU6656 - 0% Strain		DMSO - 15% Strain		SU6656 - 15% Strain
		# Cells Analyzed	% Cells Positive	# Cells Analyzed	% Cells Positive	# Cells Analyzed	% Cells Positive	# Cells Analyzed	% Cells Positive
	Replicate 1	861	11.14	727	6.6	833	16.44	713	5.89
	Replicate 2	940	12.87	1011	11.57	1132	23.23	911	10.53
	Replicate 3	1153	10.49	1058	12.38	826	21.06	1040	15.86
	Replicate 4	973	11.4	875	9.02	782	23.27	863	12.74
	Replicate 5	1115	11.47	899	11.56	794	23.67	909	12.98
	Average		11.474		10.226		21.534		11.6
	SEM		0.502835		1.37925		1.74705		2.14283

## Sheet: Figure 3D
% Cells EdU Positive
Figure 3D
Collected from 3 Independent Experiments
		DMSO - 0% Strain		SU6656 - 0% Strain		DMSO - 15% Strain		SU6656 - 15% Strain
		# Cells Analyzed	% Cells Positive	# Cells Analyzed	% Cells Positive	# Cells Analyzed	% Cells Positive	# Cells Analyzed	% Cells Positive
	Replicate 1	677	9.89	9.02	8.53	708	20.33	844	12.67
	Replicate 2	1164	12.54	1114	2.51	1014	30.07	947	16.36
	Replicate 3	1168	8.56	1155	3.03	1226	18.76	1042	6.23
	Replicate 4	1142	9.19			1063	25.68
	Average		10.045		4.69		23.71		11.7533
	SEM		1.01024		1.92586		2.98622		2.95998

## Sheet: Figure 3F
pY654 Intensity (Average Intensity per Pixel)
Figure 3F
Collected from 3 Independent Experiments
		DMSO		SU6656
		0% Strain	15% Strain	0% Strain	15% Strain
	Average	1.00074	2.35907	1.00077	1.12443		Note: Intensity values were normalized to minimum pixel intensity of no strain condition to isolate effect of strain on pY654 levels
	SEM	0.0566251	0.129353	0.0734438	0.0733803
	Image intensity data extend downwards…	1.24211	1.99649	0.0933852	1.28794
	* Break indicates new independent experiment	1.01754	1.18246	0.486381	1.14397
	* Each value is single field intensity value	1.25263	2.65965	1.28405	0.949416
		0.726316	1.92982	1.19066	0.661479
		1.32982	1.39298	0.961089	1.49805
		1.06667	2.97544	0.941634	1.45525
		0.768421	2.20351	1.54475	0.322957
		0.6	2.75789	1.50973	0.762646
		1.24645	1.87678	1.35747	1.55656
		0.582938	1.2891	0.728507	1.54299
		0.507109	2.19905	0.968326	1.48869
		0.706161	2.07109	1.11312	1.47964
		1.41706	2.5782	1.27149	1.25339
		1.11374	2.26066	0.904977	1.35747
		1.2654	2.35071	0.800905	1.70136
		1.17536	2.109	0.855204	1.13122
		0.913978	3.21505	1.18305	0.759322
		1.26882	3.01075	1.22712	1.12881
		1.30824	3.82796	0.962712	0.647458
		1.20789	2.3405	0.935593	0.620339
		0.939068	2.03584	1.55254	1.09153
		0.78853	2.40143	0.457627	1.15254
		0.921147	3.25806	1.08475	1.04068
		0.65233	2.69534	0.60339	0.952542

## Sheet: Figure 3, Supplement 2B
% Cells TOPdGFP Positive
Figure 3, Supplement 4B
Collected from 5 Independent Experiments
		DMSO - 0% Strain		PP2 - 0% Strain		DMSO - 15% Strain		PP2 - 15% Strain
		# Cells Analyzed	% Cells Positive	# Cells Analyzed	% Cells Positive	# Cells Analyzed	% Cells Positive	# Cells Analyzed	% Cells Positive
	Replicate 1	1196	9.78	987	2.63	1220	18.032	979	9.7
	Replicate 2	625	10.24	744	8.33	835	23.59	823	14.45
	Replicate 3	778	10.25	845	6.46	710	19.49	437	4.35
	Replicate 4	1088	11.81	1133	12.07	1203	24.59	1197	13.64
	Replicate 5	1079	10.09	1149	7.71	1113	19.93	1229	16.16
	Average		10.434		7.44		21.1264		11.66
	SEM		0.457431		1.96635		1.62661		2.72691

## Sheet: Figure 3, Supplement 2D
% Cells EdU Positive
Figure 3, Supplement 4D
Collected from 3 Independent Experiments
		DMSO - 0% Strain		PP2 - 0% Strain		DMSO - 15% Strain		PP2 - 15% Strain
		# Cells Analyzed	% Cells Positive	# Cells Analyzed	% Cells Positive	# Cells Analyzed	% Cells Positive	# Cells Analyzed	% Cells Positive
	Replicate 1	962	7.9	861	5.11	486	26.74	707	9.05
	Replicate 2	964	9.33	1007	7.14	1080	22.68	1118	11.53
	Replicate 3	1347	11.92	1478	12.58	1250	19.52	1302	10.44
	Average		9.71667		8.27667		22.98		10.34
	SEM		1.17647		2.23004		2.08963		0.717658

## Sheet: Figure 3, Supplement 2F
pY654 Intensity (Average Intensity per Pixel)
Figure 3, Supplement 4F
Collected from 3 Independent Experiments
		DMSO		PP2
		0% Strain	15% Strain	0% Strain	15% Strain
	Average	2.79445	5.96578	1.74894	1.41629		Note: Intensity values were normalized to minimum pixel intensity of no strain condition to isolate effect of strain on pY654 levels
	SEM	0.443395	0.799796	0.259047	0.27342
	Image intensity data extend downwards…	3.59151	12.9117	1.61136	0.00161933
	* Break indicates new independent experiment	11.0762	9.3003	1	0.920528
	* Each value is single field intensity value	3.5605	11.0435	3.6075	2.11173
		2.19953	12.1055	6.25785	4.56652
		2.49275	0.883047	2.36211	2.61584
		4.58375	2.24907	2.35837	2.88229
		2.40681	3.76272	3.47285	4.22521
		1	7.05089	1.52765	4.07312
		1	1.88667	0.0328175	1.70124
		1.23448	3.80069	1.43734	0.800544
		1.13374	2.69561	1.07227	0.670974
		0.474164	5.35085	1	0.284135
		3.80634	2.09683	0.0578133	0.110865
		3.30786	2.25575	1.02364	0.541915
		4.39514	0.735562	1.36286	0.584935
			2.78854	1.37868	0.224792
		2.76085	11.4362	1	0.613653
		2.42937	9.12887	2.14306	0.833599
		1	8.32956	1.80348	0.20541
		2.34388	9.8333	1.58998	0.615616
		4.03719	3.05941	1.28245	1.16195
		2.49434	4.09382	1.61531	1.24822
		2.03932	6.83522	1.31382	1.5165
		0.90468	9.5452	1.66333	1.47973

## Sheet: Figure 3, Supplement 4B
% Cells TOPdGFP Positive
Figure 3, Supplement 4B
Collected from 5 Independent Experiments
		DMSO - 0% Strain		PD153035 - 0% Strain		DMSO - 15% Strain		PD153035 - 15% Strain
		# Cells Analyzed	% Cells Positive	# Cells Analyzed	% Cells Positive	# Cells Analyzed	% Cells Positive	# Cells Analyzed	% Cells Positive
	Replicate 1	861	11.14	890	12.58	833	16.44	690	17.53
	Replicate 2	940	12.87	1019	10.89	1132	23.23	832	25
	Replicate 3	1153	10.49	1116	9.22	826	21.06	1025	17.56
	Replicate 4	973	11.4	957	12.01	782	23.27	712	14.04
	Replicate 5	1115	11.47	823	11.66	794	23.67	1073	19.66
	Average		11.474		11.272		21.534		18.758
	SEM		0.502835		0.750704		1.74705		2.327

## Sheet: Figure 3, Supplement 4D
% Cells EdU Positive
Figure 3, Supplement 2D
Collected from 3 Independent Experiments
		DMSO - 0% Strain		PD153035 - 0% Strain		DMSO - 15% Strain		PD153035 - 15% Strain
		# Cells Analyzed	% Cells Positive	# Cells Analyzed	% Cells Positive	# Cells Analyzed	% Cells Positive	# Cells Analyzed	% Cells Positive
	Replicate 1	677	9.89	995	11.85	708	20.33	765	21.3
	Replicate 2	1164	12.54	1033	9.87	1014	30.07	890	25.05
	Replicate 3	1168	8.56	976	10.24	1226	18.76	871	23.88
	Replicate 4	1142	9.19			1063	25.68
	Average		10.045		10.6533		23.71		23.41
	SEM		1.01024		0.607792		2.98622		1.10775

## Sheet: Figure 3, Supplement 4F
pY654 Intensity (Average Intensity per Pixel)
Figure 3, Supplement 2F
Collected from 3 Independent Experiments
		DMSO		PD153035
		0% Strain	15% Strain	0% Strain	15% Strain
	Average	1.00074	2.35907	1	1.80059		Note: Intensity values were normalized to minimum pixel intensity of no strain condition to isolate effect of strain on pY654 levels
	SEM	0.0566251	0.129353	0.064493	0.0977343
	Image intensity data extend downwards…	1.24211	1.99649	1.69118	2.3125
	* Break indicates new independent experiment	1.01754	1.18246	1.20588	1.46324
	* Each value is single field intensity value	1.25263	2.65965	0.654412	1.66176
		0.726316	1.92982	0.775735	2.35662
		1.32982	1.39298	1.3125	2.14338
		1.06667	2.97544	1.00735	1.86029
		0.768421	2.20351	0.764706	1.14338
		0.6	2.75789	0.588235	2.27941
		1.24645	1.87678	0.824176	1.24542
		0.582938	1.2891	1.30403	1.31502
		0.507109	2.19905	0.765568	1.60073
		0.706161	2.07109	0.684982	2
		1.41706	2.5782	0.875458	1.51282
		1.11374	2.26066	1.16484	1.54212
		1.2654	2.35071	1.08791	1.17949
		1.17536	2.109	1.29304	1.05861
		0.913978	3.21505	1.42243	1.63246
		1.26882	3.01075	1.2315	2.54415
		1.30824	3.82796	0.649165	1.61814
		1.20789	2.3405	0.739857	1.47971
		0.939068	2.03584	1.53222	2.69212
		0.78853	2.40143	0.99284	2.05728
		0.921147	3.25806	0.749403	2.05728
		0.65233	2.69534	0.682578	2.45823
