# Supplementary material for: Increasing β-catenin/Wnt3A activity levels drive mechanical strain-induced cell cycle progression through mitosis
Source: eLife journal article supplement (doi:10.7554/elife.19799), 2016-10-26
Supplement: supp [file elife-19799-supp-v1.zip › elife_poa_e19799_Figure_4_source_data_1.xlsx]

## Sheet: Figure 4B
% Cells TOPdGFP Positive
Figure 4B
Collected from 3 Independent Experiments
		DMSO - 0% Strain		D4476 - 0% Strain		DMSO - 15% Strain		D4476 - 15% Strain
		# Cells Analyzed	% Cells Positive	# Cells Analyzed	% Cells Positive	# Cells Analyzed	% Cells Positive	# Cells Analyzed	% Cells Positive
	Replicate 1	1026	5.95	922	27.58	841	26.03	1099	69.15
	Replicate 2	938	6.28	892	43.28	1072	14.32	694	82.13
	Replicate 3	967	14.16	1161	25.53	1189	21.53	1042	44.86
	Average		8.79667		32.13		20.6267		65.38
	SEM		2.68336		5.60632		3.41043		10.9228

## Sheet: Figure 4D
% Cells EdU Positive
Figure 4D
Collected from 3 Independent Experiments
		DMSO - 0% Strain		D4476 - 0% Strain		DMSO - 15% Strain		D4476 - 15% Strain
		# Cells Analyzed	% Cells Positive	# Cells Analyzed	% Cells Positive	# Cells Analyzed	% Cells Positive	# Cells Analyzed	% Cells Positive
	Replicate 1	1216	8.63	1394	12.26	606	24.58	1307	34.88
	Replicate 2	1198	10.51	832	13.1	920	16.08	1115	26.62
	Replicate 3	1265	11.38	1282	8.73	932	18.56	1222	28.76
	Average		10.1733		11.3633		19.74		30.0867
	SEM		0.811508		1.33881		2.52367		2.475

## Sheet: Figure 4F
pY654 Intensity (Total Image Intensity)
Figure 4F
Collected from 3 Independent Experiments
		DMSO		D4476
		0% Strain	15% Strain	No Strain	High Strain
	Average	2.79445	5.96578	2.75929	5.27695		Note: Intensity values were normalized to minimum pixel intensity of no strain condition to isolate effect of strain on pY654 levels
	SEM	0.443395	0.799796	0.332304	0.606175
	Image intensity data extend downwards…	3.59151	12.9117	1	3.91558
	* Break indicates new independent experiment	11.0762	9.3003	2.46429	8.23737
	* Each value is single field intensity value	3.5605	11.0435	1.45599	8.48701
		2.19953	12.1055	1.39971	10.1266
		2.49275	0.883047	4.16162	8.04726
		4.58375	2.24907	6.79942	12.2561
		2.40681	3.76272	4.921	8.18795
		1	7.05089	5.69444	10.2558
		1	1.88667	1	1.23835
		1.23448	3.80069	1.48844	3.66199
		1.13374	2.69561	1.54604	3.2842
		0.474164	5.35085	1.51951	2.08336
		3.80634	2.09683	1.91929	2.71012
		3.30786	2.25575	3.00606	2.49337
		4.39514	0.735562	2.75104	3.5684
			2.78854	2.66919	2.06707
		2.76085	11.4362	3.09497	4.79179
		2.42937	9.12887	5.69077	5.42286
		1	8.32956	3.21729	4.83771
		2.34388	9.8333	3.41094	3.92604
		4.03719	3.05941	1	4.57587
		2.49434	4.09382	2.02316	3.78613
		2.03932	6.83522	2.05979	3.51754
		0.90468	9.5452	1.92995	5.16825
