# Supplementary material for: Increasing β-catenin/Wnt3A activity levels drive mechanical strain-induced cell cycle progression through mitosis
Source: eLife journal article supplement (doi:10.7554/elife.19799), 2016-10-26
Supplement: supp [file elife-19799-supp-v1.zip › elife_poa_e19799_Figure_5_source_data_1.xlsx]

## Sheet: Figure 5B
% Cells Geminin Positive (No Strain)
Figure 5B
Collected from 2-3 Independent Experiments per condition (multiple movie fields per experiment)
	Condition	Average # of Cells detected per movie frame	0 Hour	1 Hour	2 Hours	3 Hours	4 Hours	5 Hours	6 Hours	7 Hours	8 Hours	9 Hours	10 Hours	11 Hours	12 Hours	13 Hours	14 Hours	15 Hours	16 Hours	17 Hours	18 Hours	19 Hours	20 Hours	21 Hours	22 Hours	23 Hours	24 Hours
	DMSO - No Strain - 1	2021.3	10.5516	11.6082	12.3136	12.5341	12.9223	11.9174	11.5086	11.5266	11.552	10.9541	10.7396	10.7972	10.5755	10.8016	11.0678	11.127	10.6443	11.0345	10.8716	10.126	10.0398	9.78686	10.1449	10.09	10.01
	DMSO - No Strain - 2	1480	9.37294	8.74848	8.95785	8.25921	8.97651	10.1075	11.0335	9.73922	10.335	10.9012	9.18367	10.6865	10.6061	10.0459	10.8272	10.7465	10.5263	10.7093	10.6746	9.65812	8.64198	7.41436	7.49186	7.08333	7.03704
	DMSO - No Strain - 3	1667.4	10.4963	10.647	10.0731	10.2502	11.4794	10.7867	9.59079	9.41558	9.11392	8.63971	8.63132	9.26276	9.14286	9.75143	9.81964	9.3423	9.54617	9.12698	9.92794	10.1051	9.94475	10.6399	10.7843	11.8736	12.1445
	DMSO - No Strain - 4	1879.6	8.83418	7.8707	8.08424	7.15278	7.14286	6.80317	6.65509	7.31707	7.81832	6.73401	6.86483	6.68869	7.64064	7.45543	7.21817	6.28981	7.07965	7.60518	7.60959	7.80526	7.52688	8.08664	7.8125	8.05271	7.61636
	DMSO - No Strain - 5	1920.64	8.8716	8.83281	8.34621	8.48765	8.33333	7.94358	8.81226	9.24488	8.73724	9.46143	10.2096	9.24025	8.41889	8.68385	8.87818	8.38531	8.35031	8.79044	9.00901	8.89047	9.25926	9.68883	9.32025	10.1173	10.4669
	DMSO - No Strain - 6	1841.9	12.5893	10.1695	10.2993	10.0437	11.5162	10.864	10.6412	9.82143	10.0683	9.55932	8.76954	8.90603	9.5537	9.61938	8.9172	9.23836	9.27247	9.32081	9.30556	9.57668	9.79706	10.0137	9.49721	9.56341	9.45853
	DMSO - No Strain - 7	1750	13.5774	12.7737	13.2783	13.0979	13.3935	12.3816	11.8528	13.6808	13.4299	12.077	12.4484	12.7517	12.8594	13.3832	12.8143	12.4898	12.8329	11.6402	11.0932	10.8934	11.138	9.74513	9.84615	9.97662	10.3957
	DMSO - No Strain - 8	1492.84	11.6822	11.1444	11.4909	11.5679	10.8418	11.6959	10.8355	10.1297	9.80149	8.86792	10.1316	10.7893	9.95542	9.72669	8.58688	9.22535	8.25083	8.48995	9.55364	8.53495	9.43526	8.70419	9.20564	9.13183	9.55975
	DMSO - No Strain - 9	1376.24	7.22802	8.17791	7.43802	7.98742	9.32452	8.75689	9.6571	10.952	10.3846	10.5114	10.8714	10.4668	11.149	11.5135	9.10683	10.8824	10.2029	11.1858	12.4235	11.5361	12.4387	11.9512	12.8112	12.625	12.8659
	DMSO - No Strain - 10	1351.2	8.04249	8.78963	9.10345	9.1954	9.47902	10.1116	9.30818	9.23845	8.98275	8.37549	7.47801	7.71605	7.76583	8.00942	7.57845	8.03357	8.76321	7.77085	7.60266	9.17843	8.8646	8.67948	9.30233	10.3796	9.46987
	DMSO - No Strain - 11	1407.5	8.3167	8.19342	8.76055	8.43061	8.5389	8.6262	8.16832	7.79867	7.19352	7.55487	7.10997	8	7.89729	8.16733	7.84798	8.3254	8.16929	8.3926	8.26886	9.34625	9.63542	10.1348	10.3466	10.7251	9.73783
	DMSO - No Strain - 12	1347.4	8.22864	8.57143	8.16078	7.71513	7.94393	7.68322	7.75103	8.20652	7.85679	8.14076	7.63322	7.52438	7.66917	8.31155	8.34598	8.93417	9.25342	9.59446	8.96794	8.71895	8.78312	9.11708	9.2847	9.37069	9.37925
	DMSO - No Strain - 13	1331.16	8.20124	7.70218	8.01551	7.71684	8.01051	7.41641	7.71192	7.33154	6.4347	6.45328	7.06076	6.73989	7.31847	6.92042	7.18458	6.40956	6.22631	6.18926	6.13046	6.88652	6.69536	6.87303	6.43103	7.00252	7.2973
	DMSO - No Strain - 14	1452.88	9.13272	9.33998	9.00791	9.36375	8.7402	9.2638	9.45783	9.16245	9.0549	8.667	9.18142	9.30365	8.89552	8.45154	8.44327	8.43558	9.18071	8.65215	9.06878	8.77955	8.87145	9.41109	9.96462	10.8608	9.73995
	Average		9.65181	9.46923	9.52356	9.41447	9.7602	9.597	9.49886	9.54035	9.34024	9.0641	9.02239	9.20522	9.24627	9.3458	9.04545	9.13322	9.16419	9.17875	9.32196	9.28827	9.36226	9.30331	9.44595	9.77517	9.65563
	SEM		0.50102	0.415102	0.468457	0.498154	0.519244	0.479273	0.417179	0.460042	0.483983	0.43695	0.453853	0.471242	0.435386	0.462504	0.429451	0.465384	0.43459	0.412611	0.437773	0.318911	0.374457	0.350202	0.409664	0.43063	0.4359
	D4476 - No Strain - 1	1850	9.87492	10.4513	11.6717	10.8967	11.5802	12.5091	11.0103	8.8586	8.98502	7.58242	7.84946	7.04151	6.50155	7.20766	7.26007	7.15667	7.14638	6.84392	7.34127	7.01754	7.57649	6.78537	7.26	7.86	6.98
	D4476 - No Strain - 2	1277.2	14.2964	14.0955	16.3303	15.9886	16.4396	16	15.2401	14.7397	14.7574	14.4231	13.8003	14.0193	13.5811	13.855	14.6697	14.0514	14.3895	14.1975	13.9283	13.4794	14.8476	13.3659	14.4195	13.3125	12.9582
	D4476 - No Strain - 3	1411.1	12.395	12.4644	13.6821	12.7148	13.9669	13.0769	12.9387	12.4549	12.3337	12.1249	13.8092	13.4741	13.0697	13.4308	13.8909	11.843	12.1854	12.6255	12.6677	12.2857	13.056	10.2113	9.86278	11.7013	12.4598
	D4476 - No Strain - 4	1285.2	14.2229	14.6014	15.8363	16.3704	15.9027	16.1228	15.2507	14.7139	14.2475	14.3347	13.8052	13.7787	13.2196	13.253	14.6283	13.4371	13.8229	14.0625	12.6707	13.0435	15.3539	14.0882	13.4012	13.5683	12.6582
	D4476 - No Strain - 5	1352.5	10.8244	12.3372	13.3736	14.0155	14.5068	14.3536	11.1111	11.4158	10.5461	10.6206	11.2338	10.0269	11.4365	11.338	12.1681	10.5119	10.741	11.5556	10.8484	11.0577	11.6728	12.3344	11.9816	12	11.8987
	D4476 - No Strain - 6	1070.9	13.0154	14.823	13.8745	15.4532	14.0089	13.427	15.0249	14.1482	13.3333	12.9741	12.9367	12.0172	12.907	12.423	12.362	12.0812	12.2099	11.3846	11.3778	11.259	11.4943	9.74843	9.86214	10.3191	9.53413
	D4476 - No Strain - 7	1523.3	10.0801	10.1547	11.4879	11.745	12.4584	12.2648	11.6279	11.5858	11.3396	10.8614	10.536	10.4689	10.3666	10.0384	10.084	9.72938	9.60415	9.652	9.05537	10.0138	8.84167	9.49367	9.62457	9.75	9.47
	D4476 - No Strain - 8	1441.8	10.1882	9.72046	10.228	11.609	11.4604	11.4721	11.1262	10.5298	10.755	9.62567	9.68153	10.1257	10.2473	9.81308	9.90437	10.0289	9.50704	9.32081	8.87949	9.57768	9.82428	9.58589	9.77918	9.56	10
	D4476 - No Strain - 9	1408.52	9.48617	9.28814	10.5552	10.144	10.6212	10.4294	10.4111	10.299	10.5521	9.40171	9.84637	9.66831	9.90237	9.55882	9.45848	9.14849	8.54573	8.00278	8.78431	9.20945	8.68241	9.2535	9.51973	9.91	10.12
	D4476 - No Strain - 10	1661.28	9.07831	10.1519	9.77089	9.77301	9.98759	9.86436	10.3295	10.1684	10.3404	9.63102	9.78261	9.67544	9.66011	9.14668	9.39828	9.44928	9.40649	9.05598	9.06096	9.12744	8.49057	9.4	11.89	10.96	10.75
	D4476 - No Strain - 11	1551.57	11.9126	12.2715	12.8636	12.318	14.0886	13.9701	13.4715	13.061	13.1527	13.118	12.9844	13.5802	12.6866	13.7601	11.0914	11.3504	11.9611	12.5085	11.7492	12.2265	8.60118	10.94	11.34	12.45	11.42
	D4476 - No Strain - 12	1397.5	10.1032	11.3887	11.295	11.0334	10.8357	10.8266	12.4642	12.0338	12.696	11.9917	12.1212	12.4911	10.9914	12.6102	11.8347	11.916	11.7982	12.7943	12.865	11.7647	10.0487	10.74	11.45	11.15	11.83
	D4476 - No Strain - 13	1240.5	9.319	9.83871	10.2826	9.37245	9.03065	6.82968	8.51064	9.55766	8.0486	8.5004	8.70607	8.36066	8.18331	9.69345	9.81039	10.4405	10.6122	11.6489	11.6433	10.0937	10.7657	10.56	11.75	11.73	12.45
	D4476 - No Strain - 14	1619.57	6.72154	6.97996	8.70147	8.69841	10.144	10.4637	10.8005	11.4489	11.068	10.5556	10.3512	10.2066	10.6512	9.6911	9.5526	9.28398	9.81337	10.0851	9.57632	9.79104	8.09452	11	12.6	12.54	11.82
	Average		10.8227	11.3262	12.1395	12.1523	12.5023	12.2579	12.0941	11.7868	11.5825	11.1247	11.246	11.0668	10.9575	11.1299	11.151	10.7449	10.8388	10.9813	10.7463	10.7105	10.525	10.5362	11.0529	11.2008	11.0249
	SEM		0.566341	0.598489	0.607034	0.662422	0.621084	0.674449	0.549496	0.498585	0.515901	0.563827	0.535193	0.581769	0.548616	0.559124	0.588689	0.490783	0.538312	0.593568	0.525323	0.473549	0.663456	0.491683	0.495942	0.426133	0.44253
	D4476 + iCRT3 - NS - 1	1882	6.38779	6.38779	6.28792	7.07395	6.93431	7.47126	6.16438	7.09439	6.43341	6.81818	6.13183	6.11511	6.10066	6.07872	6.56096	5.79151	5.61351	5.7868	5.49451	5.68365	5.3494	5.16409	4.79739	4.93888	5.18717
	D4476 + iCRT3 - NS - 2	1745	8.93703	9.1499	9.24051	9.83819	11.3518	10.3666	10.5787	10.1903	10.1968	10.0901	9.85591	9.47787	9.50764	9.31129	9.39933	9.34125	8.9172	9.27778	9.04836	8.82353	8.80696	9.18316	9.12281	9.42813	9.41049
	D4476 + iCRT3 - NS - 3	1716.32	8.166	7.31422	7.15096	8.90313	8.97616	9.07791	9.70095	9.45142	9.22392	9.49242	9.8582	7.92906	7.92132	7.61317	8.20981	7.37705	8.14507	8.52378	7.88571	8.17308	7.13202	7.95885	6.54118	6.68293	6.53003
	D4476 + iCRT3 - NS - 4	1693.3	7.69231	6.84524	6.66667	7.67178	8.99471	8.9172	9.76378	9.07749	8.50919	8.73239	8.12791	6.93989	7.30643	7.56788	7.48011	7.1389	7.25534	6.98413	6.61986	7.58579	6.72313	6.50155	5.5103	6.09189	5.65553
	D4476 + iCRT3 - NS - 5	2044.2	6.07867	6.13393	6.04752	6.27682	6.30965	6.283	6.45995	6.34921	6.19647	6.06663	5.96285	5.80271	5.71017	5.65589	5.7346	5.62791	5.56845	5.54785	5.46373	5.32915	5.15556	5.23724	4.99558	5.30372	5.26568
	D4476 + iCRT3 - NS - 6	1387.1	11.5443	11.5889	12.26	11.903	12.1846	12.5625	12.8602	13.0621	13.2455	13.8006	13.7268	13.8122	13.9394	13.8567	14.4279	13.9956	13.484	13.305	14.4238	13.9033	13.2392	12.5638	13.0564	12.945	12.4688
	D4476 + iCRT3 - NS - 7	1404.1	10.0398	10.8955	11.1527	10.9851	10.5708	10.3616	10.3787	10.6071	11.0882	11.2252	11.7729	11.9868	11.7486	11.9174	12.1935	11.8029	12.0456	12.4016	11.8121	12.671	12.4545	11.3571	11.9765	11.1969	11.827
	D4476 + iCRT3 - NS - 8	1279.9	10.8068	7.17489	7.97872	7.82339	7.83723	8.97436	10.1683	10.0904	10.7169	10.1439	11.7084	12.1321	12.7959	13.1403	13.5659	13.6923	13.3545	13.9144	14.4169	14.2857	13.4615	14.6583	14.914	14.7224	14.366
	D4476 + iCRT3 - NS - 9	1501.7	8.25893	8.63411	9.3185	9.38124	9.13365	8.99108	10.2835	10.616	10.3018	10.9079	10.9254	10.8784	11.6499	11.7536	11.7197	11.5285	10.9564	11.4137	11.2058	11.0271	10.688	11.3025	11.7014	11.3525	11.7694
	D4476 + iCRT3 - NS - 10	1328	10.9325	11.7965	11.6805	11.2741	11.7216	12.0573	11.516	11.8263	11.576	12.5564	12.3132	12.1147	12.4242	13.1518	12.6248	12.1951	13.1441	12.8434	12.6259	12.5	12.5	12.3328	12.3245	12.6678	13.1467
	D4476 + iCRT3 - NS - 11	1453.4	9.23196	10.5107	11.9708	11.2994	11.2676	11.769	12.3603	11.618	11.8529	11.9048	11.8037	12.0767	12.2066	12.6061	12.5741	12.6506	12.8901	13.4091	13.6054	12.468	11.6706	12.0412	12.5632	11.9048	12.3704
	Average		8.91601	8.76652	9.06861	9.31184	9.5711	9.71198	10.0213	9.99843	9.9401	10.158	10.1988	9.93322	10.1192	10.2412	10.4082	10.1038	10.1249	10.3098	10.2365	10.2228	9.74372	9.84552	9.77302	9.74863	9.81793
	SEM		0.523186	0.617849	0.691367	0.554442	0.577183	0.559639	0.605676	0.570417	0.634105	0.671732	0.729058	0.812239	0.842275	0.884623	0.874207	0.909382	0.901772	0.922098	1.00322	0.933567	0.925448	0.932289	1.06731	0.993981	1.01498

## Sheet: Figure 5C
% Cells Geminin Positive (High Strain)
Figure 5C
Collected from 2-3 Independent Experiments per condition (multiple movie fields per experiment)
	Condition	Average # of Cells detected per movie frame	0 Hour	1 Hour	2 Hours	3 Hours	4 Hours	5 Hours	6 Hours	7 Hours	8 Hours	9 Hours	10 Hours	11 Hours	12 Hours	13 Hours	14 Hours	15 Hours	16 Hours	17 Hours	18 Hours	19 Hours	20 Hours	21 Hours	22 Hours	23 Hours	24 Hours
	DMSO - High Strain - 1	1673.2	8.48297	10.3222	11.2903	10.3563	10.2455	10.3179	10.1669	9.9505	10.0877	10.7177	11.143	11.47	13.2591	14.481	16.7286	20	23.8424	21.5764	20.6897	22.18	22.42	23.34	25.56	26.7	27.82
	DMSO - High Strain - 2	1697.4	8.41977	9.56316	10.1508	10.8583	12.1097	10.7861	9.53206	10.8297	11.5918	12.7995	14.4073	15.66	16.3709	18.3781	19.035	21.0888	22.122	24.6539	25.2874	27.0685	28.5636	29.9278	31.3589	31.45	30.45
	DMSO - High Strain - 3	1474.6	9.27152	10.9199	10.7289	11.9271	13.6525	12.7914	12.7392	12.6793	12.7924	21.2056	21.0986	23.4491	24.9697	26.4106	31.9149	28.1796	17.0642	20.9003	23.3596	24.3863	20.155	21.2188	29.3869	31	32.2667
	DMSO - High Strain - 4	1248	13.7009	16.0667	16.2679	15.6802	17.4536	15.413	15.1297	14.7037	15.6078	16.4495	16.488	16.5316	17.0142	17.6805	17.7344	18.1744	19.2459	20.2256	20.4878	21.6818	22.807	22.4026	23.9601	25.4839	25.7862
	DMSO - High Strain - 5	1290	12.3917	13.991	13.835	13.3333	14.0673	13.5581	14.1089	14.4915	15.0165	14.5899	14.4578	14.4893	15.3968	14.8649	14.9083	15.7816	17.244	16.5343	18.1154	18.1479	19.3333	20.2256	19.1142	20	21.9041
	DMSO - High Strain - 6	1422.6	9.6307	12.0603	12.3404	13.0507	13.0142	12.0363	12.3644	12.1508	11.8962	12.0397	12.3769	13.1203	14.0041	14.1477	16.1269	16.39	17.4966	17.5704	18.7544	19.6119	21.1836	22.8399	23.9145	25.4167	27.7041
	Average		10.3163	12.1539	12.4356	12.5343	13.4238	12.4838	12.3402	12.4676	12.8321	14.6337	14.9953	15.7867	16.8358	17.6604	19.408	19.9357	19.5025	20.2435	21.1157	22.1794	22.4104	23.3258	25.5491	26.6751	27.6552
	SEM		0.899674	1.00472	0.932719	0.790007	0.978134	0.765995	0.88841	0.780168	0.864559	1.5483	1.43538	1.7001	1.72521	1.89159	2.56616	1.84594	1.16664	1.19113	1.11939	1.31487	1.34262	1.39912	1.78033	1.72303	1.47958
	D4476 - High Strain - 1	1492.3	8.48608	12.8374	14.0637	17.1447	18.3463	19.0909	20.0342	19.082	18.4665	17.4425	17.868	17.5723	17.5428	16.9594	17.8351	18.8746	17.6183	20	20.7317	22.6415	22.5523	24.8252	24.1926	26.12	27.37
	D4476 - High Strain - 2	1599.1	10.6977	11.249	13.3829	14.0339	14.741	15.051	14.3123	14.2422	14.0794	14.0288	14.3962	14.8873	16.2845	18.0164	20.2374	24.0544	27.2513	32.2524	36.6687	40.0242	42.0158	46.2714	49.2298	52.375	54.75
	D4476 - High Strain - 3	1546.1	13.2948	13.7398	14.9569	14.9547	15.9886	15.8784	15.9895	15.7961	15.8484	16.135	17.1077	18.1931	20.3058	21.9219	24.8366	27.1798	31.506	35.2328	39.2683	44.0887	47.1792	51.9351	54.2245	55.499	57.152
	D4476 - High Strain - 4	1617.9	18.239	18.1308	18.7082	19.5402	19.4368	18.9189	18.8655	18.4178	17.9809	17.301	17.0064	17.4089	18.0814	18.7826	20.1734	21.8483	24.6451	27.5287	29.8266	30.9195	33.3142	36.0733	38.9254	40.2154	43.2062
	D4476 - High Strain - 5	1751.1	11.8718	11.773	13.4937	13.4309	15.1114	15.8593	15.7151	15.4984	15.9153	15.7442	15.9287	16.6937	17.7565	19.1272	21.3666	25.5296	28.8377	33.4245	36.268	39.6571	42.9994	46.1538	48.9229	50.7955	53.734
	D4476 - High Strain - 6	1681.1	9.19367	8.98634	9.64789	10.8696	12.1507	13.0408	13.0178	13.1148	13.2537	13.6492	14.1975	14.9667	16.1022	18.2682	21.4086	24.605	28.7179	33.0499	37.094	42.3913	46.6857	49.5667	52.9619	54.1765	55.905
	D4476 - High Strain - 7	1848.2	12.2842	12.467	13.5517	14.259	15.0989	15.5685	15.6285	15.222	15.1357	15.2778	15.5374	15.5601	15.893	16.9147	18.4874	21.2198	23.6006	26.1114	29.6545	32.3004	34.1438	37.7408	40.3424	43.2286	44.6245
	D4476 - High Strain - 8	1702.5	14.8831	15.3097	15.8804	16.9872	17.6069	17.3341	16.9443	16.4972	16.2996	16.6207	16.5017	17.4752	17.9372	18.8455	21.6092	24.2442	26.9343	29.4186	31.6686	34.1981	36.4535	38.5549	40.5606	42.517	45.2354
	D4476 - High Strain - 9	720.1	5.27701	5.41494	5.48044	5.48951	5.84746	6.05411	6.49042	7.477	8.46535	8.44828	9.66574	10.2999	11.8475	12.6125	15.1871	15.4938	15.8516	17.049	17.9516	19.7994	19.4737	19.8302	20.0412	21.3066	21.0815
	D4476 - High Strain - 10	718.4	5.34626	5.2809	5.4961	5.56577	5.78797	5.4947	5.9915	6.91083	7.22068	8.34495	8.5014	10.2374	10.6922	11.5142	12.4914	12.8784	13.1675	14.4548	14.8495	16.0501	18.2555	19.0797	19.3255	19.9481	19.6758
	D4476 - High Strain - 11	692.8	5.2201	5.21567	5.28818	5.3592	5.50215	5.50505	5.78797	6.37482	6.98092	8.12268	7.80592	9.93562	10.8273	12.7525	13.6121	14.3172	16.4754	17.7932	17.5889	19.727	20.4119	21.9165	22.9061	25.7246	25.1313
	D4476 - High Strain - 12	717.9	5.14174	5.21082	5.5614	5.69979	5.99644	6.32867	6.58387	7.29391	8.02604	8.72714	8.72977	9.91228	11.2976	12.0778	13.7379	14.3407	14.9306	15.9722	17.8659	19.5183	19.4114	19.538	20.6849	21.9747	22.0376
	Average		9.99462	10.468	11.2926	11.9445	12.6346	12.8437	12.9467	12.9939	13.1394	13.3202	13.6039	14.4285	15.3807	16.4827	18.4152	20.3821	22.4614	25.1906	27.453	30.1096	31.908	34.2905	36.0265	37.8234	39.1586
	SEM		1.07963	1.10435	1.1929	1.29911	1.34761	1.35501	1.32507	1.17541	1.07313	0.949205	0.951896	0.840471	0.832153	0.847413	0.97211	1.25577	1.61085	1.92569	2.27005	2.54236	2.84173	3.16502	3.44454	3.49001	3.75239
	D4476+iCRT3 - HS - 1	1358.4	7.41667	8.80503	10.3367	11.484	6.25567	2.18023	0.265957	9.83607	11.9589	12.3555	13.452	14.446	14.5128	15.1907	15.5809	14.702	15.872	15.0773	17.3941	17.3015	17.4751	17.9161	17.4634	17.0619	16.7107
	D4476+iCRT3 - HS - 2	1407.5	7.83333	8.12221	9.67273	11.2385	7.47734	4.84536	0.551471	8.12221	13.4263	10.7659	16.9395	16.2693	15.3421	15.8719	16.051	17.2185	16.4598	15.8505	19.5	19.7377	19.0109	18.5049	18.5049	18.7735	18.3879
	D4476+iCRT3 - HS - 3	1430.5	8.83333	10.6657	11.8168	13.3891	12.8226	13.7483	14.3702	12.5931	13.573	12.4277	15.6584	15.007	15.8258	13.624	14.9093	10	16.0679	17.4613	20.5049	20.8333	21.204	20.2908	20.1893	20.5688	20.0398
	D4476+iCRT3 - HS - 4	1474.3	9.58333	11.6176	13.2263	15.5825	12.5	14.7039	13.2189	15.8718	12.6926	13.8006	14.4484	16.9004	16.1023	17.3706	17.5285	17.4834	17.3089	18.299	21.8731	21.7133	21.3046	21.3907	21.5294	21.7822	21.4539
	D4476+iCRT3 - HS - 5	1367.6	6.08333	7.57221	8.95865	10.9694	9.79899	10.7815	9.70782	9.46349	11.372	12.211	12.0285	13.1136	11.2647	13.8283	11.6185	12.3179	13.2593	14.6263	16.4169	16.8324	16.306	16.8994	16.3763	16.6915	17.4517
	D4476+iCRT3 - HS - 6	1301.9	0.666667	1.09562	1.18397	0.740741	0.721649	0.989283	1.0101	0.52161	1.10051	2.16763	2.27758	3.01543	3.87008	4.35967	4.7683	6.22517	8.22992	9.53608	13.8741	15.0382	15.9684	15.8718	17.2821	17.7896	17.5385
	D4476+iCRT3 - HS - 7	1588.84	8.66935	8.61842	9.25804	10.4017	9.53375	9.6401	10.8759	9.90629	10	10.0555	9.89615	10.9046	9.85312	10.2406	10.3112	11.3309	12.6055	13.7136	14.878	16.9091	18.0564	19.5521	22.8675	25.2226	27.5883
	D4476+iCRT3 - HS - 8	1543.8	8.10075	7.99731	8.32215	8.53175	8.44794	8.29016	9.42127	9.08505	8.54369	9.25566	9.38511	10.1421	8.8535	9.33852	9.8329	10.6355	10.7849	12.1134	13.2288	14.0051	15.1458	15.879	17.7582	19.5977	21.6269
	D4476+iCRT3 - HS - 9	1753.7	7.02194	7.64563	7.97362	7.88699	7.43322	7.25479	7.10542	7.12657	7.67898	7.39278	7.33371	7.78098	7.48999	7.18697	7.31429	7.56208	7.96975	8.57143	8.96514	9.90644	11.4491	11.8653	12.7913	14.3248	15.5014
	D4476+iCRT3 - HS - 10	1636	10.0719	8.20106	8.69285	9.77748	10.3906	8.50153	9.88679	8.7156	8.90323	8.33823	8.48823	7.84428	7.63447	7.78032	8.53946	8.19304	8.46239	9.09592	9.64523	9.90644	11.7453	12.5	13.3113	15.0109	16.6211
	D4476+iCRT3 - HS - 11	1722.68	8.40125	8.53432	8.6983	8.88889	9.45365	9.04733	9.75919	8.95611	8.92649	9.36396	9.22118	9.84275	8.59909	8.84549	9.3076	9.73699	10.5263	11.5385	12.3009	12.9978	14.7903	15.0776	17.5947	19.61	21.5096
	D4476+iCRT3 - HS - 12	1340.7	9.50966	10.4566	11.1193	11.1386	10.5769	10.8382	10.7759	11.1031	10.8774	11.1111	11.5076	11.7261	11.3031	11.9392	13.0882	13.2117	14.7577	15.5224	17.0677	17.7577	19.1063	19.7379	22.3744	23.429	26.25
	Average		7.68263	8.27764	9.10496	10.0025	8.78436	8.40172	8.07908	9.27509	9.92109	9.93713	10.8864	11.4161	10.8876	11.298	11.5709	11.5514	12.692	13.4505	15.4708	16.0782	16.7969	17.1238	18.1702	19.1552	20.0566
	SEM		0.717529	0.752034	0.849473	1.03873	0.925211	1.19813	1.40417	1.03586	0.981784	0.889397	1.16406	1.16641	1.12376	1.14667	1.12952	1.03983	0.992567	0.942593	1.18048	1.11594	0.92859	0.869892	0.924259	0.942878	1.10534

## Sheet: Figure 5D
Single Cell Tracking of Geminin Positive Cells
Figure 5D
Collected from 2-3 Independent Experiments per condition (multiple movie fields per experiment)
	Condition	Number of Geminin-Positive Objects Detected	G1 to S Objects			<= # of Objects was normalized to number of geminin-positive objects in first frame of movie
	DMSO - No Strain - 1	315	1.06
	DMSO - No Strain - 2	315	0.94
	DMSO - No Strain - 3	356	1.34
	DMSO - No Strain - 4	381	1.37
	DMSO - No Strain - 5	347	1.36
	DMSO - No Strain - 6	243	1.08
	DMSO - No Strain - 7	429	0.94
	DMSO - No Strain - 8	354	0.78
	DMSO - No Strain - 9	381	1.12
	DMSO - No Strain - 10	388	0.87
	DMSO - No Strain - 11	468	0.65
	DMSO - No Strain - 12	337	1.26
	DMSO - No Strain - 13	337	1.1
	DMSO - No Strain - 14	423	1.02
	Average		1.06357
	SEM		0.0585034
	DMSO - High Strain - 1	231	1.32
	DMSO - High Strain - 2	209	2.09
	DMSO - High Strain - 3	282	2.09
	DMSO - High Strain - 4	279	2.81
	DMSO - High Strain - 5	719	6.57
	DMSO - High Strain - 6	408	2.81
	Average		2.94833
	SEM		0.75894
	Condition	Number of Geminin-Positive Objects Detected	G1 to S Objects
	D4476 - No Strain - 1	160	0.34
	D4476 - No Strain - 2	167	0.27
	D4476 - No Strain - 3	159	0.37
	D4476 - No Strain - 4	256	1.01
	D4476 - No Strain - 5	320	0.84
	D4476 - No Strain - 6	387	0.88
	D4476 - No Strain - 7	353	1.08
	D4476 - No Strain - 8	335	0.86
	D4476 - No Strain - 9	459	0.66
	D4476 - No Strain - 10	430	0.65
	D4476 - No Strain - 11	453	0.67
	D4476 - No Strain - 12	371	0.85
	D4476 - No Strain - 13	264	0.95
	D4476 - No Strain - 14	223	3.57
	Average		0.928571
	SEM		0.214027
	D4476 - High Strain - 1	663	2.73
	D4476 - High Strain - 2	457	11.91
	D4476 - High Strain - 3	450	7.32
	D4476 - High Strain - 4	542	16.9
	D4476 - High Strain - 5	458	11.88
	D4476 - High Strain - 6	1239	4.13
	D4476 - High Strain - 7	1315	6.32
	D4476 - High Strain - 8	1105	3.544
	D4476 - High Strain - 9	1281	2.8
	D4476 - High Strain - 10	1268	3.86
	D4476 - High Strain - 11	1227	3.18
	D4476 - High Strain - 12	1173	3.3
	Average		6.4895
	SEM		1.16181
	Condition	Number of Geminin-Positive Objects Detected	G1 to S Objects
	D4476 + iCRT3 - NS - 1	241	1.23
	D4476 + iCRT3 - NS - 2	381	1.45
	D4476 + iCRT3 - NS - 3	624	1.34
	D4476 + iCRT3 - NS - 4	303	1.33
	D4476 + iCRT3 - NS - 5	264	1.35
	D4476 + iCRT3 - NS - 6	264	1.52
	D4476 + iCRT3 - NS - 7	362	0.58
	D4476 + iCRT3 - NS - 8	301	0.43
	D4476 + iCRT3 - NS - 9	337	0.54
	D4476 + iCRT3 - NS - 10	302	0.57
	D4476 + iCRT3 - NS - 11	305	0.59
	Average		0.993636
	SEM		0.132742
	D4476+iCRT3 - HS - 1	434	1.34
	D4476+iCRT3 - HS - 2	469	1.44
	D4476+iCRT3 - HS - 3	529	1.24
	D4476+iCRT3 - HS - 4	574	1.23
	D4476+iCRT3 - HS - 5	398	1.44
	D4476+iCRT3 - HS - 6	466	2.18
	D4476+iCRT3 - HS - 7	552	2.95
	D4476+iCRT3 - HS - 8	431	2.54
	D4476+iCRT3 - HS - 9	398	2.15
	D4476+iCRT3 - HS - 10	411	1.92
	D4476+iCRT3 - HS - 11	530	2.55
	D4476+iCRT3 - HS - 12	485	2.61
	Average		1.96583
	SEM		0.177296
