# Supplementary material for: Increasing β-catenin/Wnt3A activity levels drive mechanical strain-induced cell cycle progression through mitosis
Source: eLife journal article supplement (doi:10.7554/elife.19799), 2016-10-26
Supplement: supp [file elife-19799-supp-v1.zip › elife_poa_e19799_Figure_6_source_data_1.xlsx]

## Sheet: Figure 6B
# Mitotic Events per .1 mm square (No Strain)
Figure 6B
Collected from 2-3 Independent Experiments (multiple movie fields per experiment)
	Condition	DMSO - No Strain - 1	DMSO - No Strain - 2	DMSO - No Strain - 3	DMSO - No Strain - 4	DMSO - No Strain - 5	DMSO - No Strain - 6	DMSO - No Strain - 7	DMSO - No Strain - 8	DMSO - No Strain - 9	DMSO - No Strain - 10	DMSO - No Strain - 11	DMSO - No Strain - 12	DMSO - No Strain - 13	DMSO - No Strain - 14	Average	SEM		D4476 - No Strain - 1	D4476 - No Strain - 2	D4476 - No Strain - 3	D4476 - No Strain - 4	D4476 - No Strain - 5	D4476 - No Strain - 6	D4476 - No Strain - 7	D4476 - No Strain - 8	D4476 - No Strain - 9	D4476 - No Strain - 10	D4476 - No Strain - 11	D4476 - No Strain - 12	D4476 - No Strain - 13	D4476 - No Strain - 14	Average	SEM		D4476+iCRT3 - NS - 1	D4476+iCRT3 - NS - 2	D4476+iCRT3 - NS - 3	D4476+iCRT3 - NS - 4	D4476+iCRT3 - NS - 5	D4476+iCRT3 - NS - 6	D4476+iCRT3 - NS - 7	D4476+iCRT3 - NS - 8	D4476+iCRT3 - NS - 9	D4476+iCRT3 - NS - 10	D4476+iCRT3 - NS - 11	Average	SEM
	1 Hour	0.232558	0.930233	1.16279	0.697674	0.697674	0.697674	0.465116	0.930233	1.16279	0.930233	0.465116	1.86047	1.16279	1.39535	0.913621	0.112946		1.39535	0.232558	0.697674	0.930233	0.465116	0.697674	0.232558	0.697674	0.465116	1.16279	2.32558	1.86047	2.32558	2.09302	1.11296	0.202767		0.465116	0.465116	0.232558	1.16279	0.697674	0.697674	0.930233	0.465116	0.465116	0.930233	0.930233	0.676533	0.0758915
	2 Hours	1.16279	0.232558	0.465116	2.55814	1.62791	0.930233	0.930233	0.930233	0.697674	0.697674	0.697674	2.09302	1.16279	0.930233	1.07973	0.168208		0.697674	0.465116	0.232558	0.697674	0	1.39535	0.697674	0.232558	0.930233	0.697674	0.930233	0.697674	0.232558	0	0.564784	0.105462		0	0	0.232558	0.232558	0.465116	0.232558	0.465116	2.32558	1.16279	0.465116	0.465116	0.549683	0.178572
	3 Hours	1.62791	0	0.232558	1.62791	0.930233	1.86047	1.39535	0.930233	1.62791	2.09302	0.697674	1.62791	1.86047	1.39535	1.27907	0.16846		0.697674	0	0	0.465116	0.232558	0.930233	0.697674	0.930233	1.62791	0	1.86047	3.95349	2.32558	0	0.980066	0.302707		0	0	0	0	0.232558	0.465116	0.232558	0	0	0	0	0.0845666	0.0419041
	4 Hours	1.39535	0	0.930233	1.39535	1.16279	0.930233	0.697674	0.930233	1.86047	0.930233	1.62791	0.697674	1.39535	1.86047	1.12957	0.135422		1.62791	0	0.697674	0.232558	1.86047	1.39535	0.930233	0.465116	1.39535	0	0.465116	1.86047	1.62791	0.465116	0.930233	0.182434		0	0	0	0	0.232558	0.465116	1.16279	1.86047	1.16279	0.465116	0.930233	0.570825	0.167616
	5 Hours	0.930233	0	1.39535	1.16279	1.86047	1.86047	1.16279	0.930233	2.32558	2.09302	0.697674	1.39535	1.39535	1.39535	1.3289	0.160657		3.25581	0.232558	0	0.465116	1.62791	2.32558	3.72093	2.7907	2.55814	0	0.232558	2.09302	3.25581	0.465116	1.64452	0.366869		0.232558	0	0	0	0	0.232558	0.697674	0.465116	0.930233	1.16279	0.697674	0.401691	0.111499
	6 Hours	1.39535	0	0.930233	2.09302	1.16279	0.930233	2.09302	1.86047	2.09302	1.62791	1.16279	1.62791	1.86047	2.09302	1.49502	0.163017		3.25581	0.465116	1.39535	0.697674	1.39535	2.55814	1.86047	2.55814	3.72093	0.465116	0.930233	3.25581	3.95349	0.930233	1.96013	0.33133		0	0	0	0	0	0.930233	0.930233	1.39535	1.16279	1.86047	1.39535	0.697674	0.19056
	7 Hours	1.39535	0	0.930233	1.86047	1.86047	1.86047	0	0.697674	2.7907	0.930233	1.86047	1.39535	1.39535	1.39535	1.31229	0.203394		5.11628	0.465116	1.16279	0.465116	1.16279	2.32558	2.55814	1.16279	3.25581	2.09302	3.02326	4.18605	3.25581	2.7907	2.3588	0.368802		0	0.232558	0	0	0	1.39535	0	0.465116	0.930233	0.697674	0.930233	0.422833	0.132777
	8 Hours	0.465116	0	1.86047	0.465116	0.930233	0.930233	0.930233	1.16279	1.16279	0.697674	0.465116	1.16279	0.930233	0.465116	0.830565	0.121195		5.34884	0.697674	1.39535	1.39535	0.930233	1.86047	2.09302	1.39535	1.62791	1.16279	1.62791	2.7907	2.55814	1.62791	1.89369	0.306297		0	0	0	0.232558	0	1.39535	0.465116	1.39535	0.465116	1.39535	1.62791	0.634249	0.180334
	9 Hours	1.39535	0.232558	1.62791	0.697674	0.697674	1.86047	1.16279	0.232558	1.39535	1.16279	0.232558	1.39535	1.16279	0.930233	1.01329	0.141327		7.44186	1.62791	1.39535	0.930233	0.697674	1.16279	1.16279	0.930233	1.39535	1.86047	1.39535	2.32558	3.48837	1.62791	1.96013	0.461083		0.232558	0	0	0	0	0	0.465116	0	0.465116	0.465116	0.465116	0.190275	0.0610132
	10 Hours	1.86047	0.232558	1.16279	1.39535	0.697674	0.232558	0.930233	0.697674	1.39535	1.39535	0.232558	0.697674	1.39535	0.465116	0.913621	0.141027		7.90698	1.62791	1.16279	0.930233	0.232558	1.62791	0.930233	0.930233	0.930233	1.62791	1.39535	2.55814	3.25581	1.39535	1.89369	0.503677		0.232558	0	0	0.232558	0	0.465116	0.465116	0.232558	0.465116	0.232558	0.697674	0.274841	0.0610132
	11 Hours	1.86047	0	2.09302	1.39535	1.39535	1.62791	0.930233	0.930233	1.39535	1.62791	0.930233	1.86047	1.39535	1.16279	1.3289	0.140952		5.5814	0.697674	1.39535	1.16279	0.697674	0.465116	0.465116	1.16279	1.16279	0.930233	2.32558	3.25581	2.32558	1.39535	1.64452	0.370095		0	0.232558	0.232558	0	0	0.232558	0.465116	0	0.465116	0.697674	0.232558	0.232558	0.0621538
	12 Hours	1.16279	0.232558	0.697674	1.39535	0.930233	1.39535	0.930233	0.232558	0.930233	0.465116	0.465116	1.39535	1.86047	0.930233	0.930233	0.129		4.4186	0.930233	1.16279	0.465116	0.465116	0	0.697674	0.465116	0.697674	2.09302	0.930233	4.88372	4.4186	1.86047	1.67774	0.444989		0	0	0.465116	0	0	0.465116	0.465116	0.232558	0.697674	0.465116	0.232558	0.274841	0.0670465
	13 Hours	0.697674	0	2.09302	1.86047	1.86047	1.62791	1.39535	1.39535	0.697674	1.16279	0.465116	0.697674	0.465116	0.232558	1.04651	0.178731		4.18605	1.16279	1.39535	1.16279	0.232558	0.232558	0.465116	0.465116	0.930233	2.09302	0.697674	2.55814	2.09302	3.48837	1.51163	0.327756		0	0	0	0	0	0.232558	0	0	0.232558	0.232558	0.232558	0.0845666	0.0313581
	14 Hours	1.86047	0.232558	1.16279	0.930233	1.39535	1.16279	1.62791	1.39535	0.465116	1.16279	0.697674	0.930233	1.16279	0.232558	1.0299	0.130635		2.7907	2.09302	1.16279	1.39535	0.697674	0.697674	0.465116	0.697674	0.930233	2.32558	1.86047	2.55814	2.32558	1.16279	1.51163	0.212179		0	0	0.232558	0	0	0.465116	0	0.232558	0.697674	1.39535	0.232558	0.295983	0.114912
	15 Hours	1.62791	0	0.697674	1.86047	1.62791	1.62791	0.930233	1.16279	1.16279	0.697674	0.697674	0.465116	1.39535	0.465116	1.0299	0.147716		2.55814	1.39535	0.930233	1.16279	0.697674	1.16279	0.697674	0.697674	0.465116	1.16279	1.62791	3.25581	3.25581	1.62791	1.47841	0.245738		0.465116	0	0	0	0	0.697674	0.232558	0.232558	0	1.16279	0.232558	0.274841	0.0995166
	16 Hours	1.86047	0	1.16279	0.930233	1.16279	1.62791	1.16279	1.62791	1.86047	0.930233	0.930233	0.697674	1.39535	0.465116	1.12957	0.141852		2.7907	1.39535	1.62791	1.39535	0.465116	0.930233	0.232558	1.16279	0.697674	2.32558	3.48837	2.55814	2.32558	2.55814	1.71096	0.260986		0	0	0	0.465116	0.232558	0.697674	0.232558	0	0.232558	0.697674	0.232558	0.2537	0.070618
	17 Hours	1.62791	0	0.930233	1.86047	1.86047	1.62791	0.930233	1.62791	1.62791	0.697674	0.930233	1.16279	0.930233	1.16279	1.21262	0.140423		0.930233	0.465116	0.697674	1.16279	0.232558	0.465116	0.232558	0.930233	0.465116	1.62791	1.86047	2.7907	0.930233	1.86047	1.04651	0.199176		0	0	0.232558	0	0	0.697674	0	0	0	0.465116	0.465116	0.169133	0.0685999
	18 Hours	0.930233	0.465116	1.62791	1.62791	1.39535	1.39535	1.62791	1.86047	0.930233	0.465116	1.86047	0.697674	1.16279	0.697674	1.19601	0.133209		3.48837	1.39535	1.62791	1.16279	0.465116	0.232558	0.465116	1.16279	0.697674	1.86047	1.39535	1.86047	1.62791	1.62791	1.36213	0.217855		0	0	0	0	0	0	0.232558	0.232558	0	0.697674	0.465116	0.147992	0.0638264
	19 Hours	2.09302	0	1.86047	0.465116	0.697674	0.697674	2.09302	0.697674	1.16279	1.62791	0.465116	0.232558	1.86047	0.465116	1.0299	0.196115		1.86047	2.09302	1.86047	0.465116	0.930233	0.465116	0.232558	0.465116	0.465116	1.86047	1.86047	2.32558	0.930233	2.55814	1.31229	0.218876		0	0	0.465116	0	0.232558	0	0	0.232558	0	0	0	0.0845666	0.0419041
	20 Hours	1.62791	0.232558	0.465116	0.465116	2.09302	1.39535	1.86047	1.16279	1.86047	1.16279	1.62791	2.09302	1.39535	0.465116	1.27907	0.171952		1.16279	1.16279	0.465116	0.930233	0.232558	0.697674	0.697674	0.232558	0	0.930233	1.39535	0.697674	0.697674	0.697674	0.714286	0.104756		0	0.465116	0	0	0	0	0.232558	0.232558	0	0	0	0.0845666	0.0419041
	21 Hours	1.86047	0	1.16279	0.465116	0.930233	1.16279	0.232558	2.09302	0.465116	0.930233	0.697674	1.16279	1.62791	0.697674	0.963455	0.161447		1.39535	0.930233	0.465116	0.465116	0	0.465116	0.930233	0.232558	0.930233	0.93	0.23	1.16	0.47	0.47	0.64814	0.10665		0	0	0	0	0	0	0	0.232558	0	0.232558	0.232558	0.0634249	0.029032
	22 Hours	1.62791	0.465116	1.16279	0.697674	0.697674	2.09302	1.86047	1.39535	0.465116	0.930233	1.62791	0.930233	0.465116	1.16279	1.11296	0.144594		1.16	0.930233	0.930233	1.16279	0.232558	0.697674	0.232558	0	0.465116	0.47	0.23	0.93	0.7	0.23	0.59794	0.102597		0	0	0	0	0	0	0.232558	0.232558	0.232558	0.232558	0.465116	0.12685	0.0427339
	23 Hours	1.16279	0	1.16279	1.39535	0.465116	1.16279	1.16279	2.09302	1.39535	1.62791	1.39535	1.62791	0.465116	0.697674	1.12957	0.148003		0.93	0.47	0.23	0.93	0.465116	0.232558	0	0.465116	0.697674	0	0.23	0.47	0.23	0	0.382176	0.0831713		0	0	0	0	0	0.465116	0.465116	0.232558	0.232558	0.232558	0.465116	0.190275	0.0543139
	24 Hours	2.32558	0.232558	0.930233	0.697674	0.465116	0	0.930233	0.465116	0.697674	1.86047	1.16279	1.86047	1.39535	0.697674	0.980066	0.179442		1.86	0.23	0.47	0.47	0.232558	0.697674	0.465116	0.697674	0.465116	0.23	0.47	0	0.23	0.47	0.499153	0.116591		0	0	0.232558	0	0	0.465116	0.465116	0.465116	0.465116	0.465116	0	0.232558	0.0621538

## Sheet: Figure 6C
# Mitotic Events per .1 mm square (High Strain)
Figure 6C
Collected from 2-3 Independent Experiments (multiple movie fields per experiment)
	Condition	DMSO - High Strain - 1	DMSO - High Strain - 2	DMSO - High Strain - 3	DMSO - High Strain - 4	DMSO - High Strain - 5	DMSO - High Strain - 6	Average	SEM		D4476 - High Strain - 1	D4476 - High Strain - 2	D4476 - High Strain - 3	D4476 - High Strain - 4	D4476 - High Strain - 5	D4476 - High Strain - 6	D4476 - High Strain - 7	D4476 - High Strain - 8	D4476 - High Strain - 9	D4476 - High Strain - 10	D4476 - High Strain - 11	D4476 - High Strain - 12	Average	SEM		D4476+iCRT3 - HS - 1	D4476+iCRT3 - HS - 2	D4476+iCRT3 - HS - 3	D4476+iCRT3 - HS - 4	D4476+iCRT3 - HS - 5	D4476+iCRT3 - HS - 6	D4476+iCRT3 - HS - 7	D4476+iCRT3 - HS - 8	D4476+iCRT3 - HS - 9	D4476+iCRT3 - HS - 10	D4476+iCRT3 - HS - 11	D4476+iCRT3 - HS - 12	Average	SEM
	1 Hour	0.930233	0.930233	0	0.697674	0.930233	0.465116	0.658915	0.0995754		1.16279	0.697674	0.232558	1.39535	0.232558	1.16279	0.697674	1.62791	1.16279	1.16279	0.930233	0.697674	0.930233	0.115522		0	0	0.232558	0.232558	0	0	0.232558	0.232558	0	1.16279	0.232558	0.232558	0.213178	0.0857072
	2 Hours	0.232558	0.465116	0.465116	0.697674	1.62791	0.465116	0.658915	0.132821		0.465116	0	0.930233	0.697674	0.697674	0.697674	0.697674	0.697674	0.465116	0.465116	0.697674	0.232558	0.562016	0.0673514		2.09302	2.09302	1.62791	1.86047	0.697674	0.697674	0	0.465116	0.465116	0	0	0.232558	0.852713	0.222263
	3 Hours	2.09302	2.32558	0	0.697674	1.86047	0	1.16279	0.283465		0.697674	0.697674	0.930233	1.62791	0.697674	0	0.930233	0.232558	0.465116	0.232558	0.465116	0	0.581395	0.122887		0.232558	0.465116	0.930233	0.930233	0.465116	0.697674	0.465116	0	0.232558	0.465116	0	0.232558	0.426357	0.0831068
	4 Hours	2.7907	2.7907	0.232558	0.232558	0.930233	1.39535	1.39535	0.312009		0.697674	0.232558	1.39535	1.86047	0.930233	0.930233	1.86047	1.16279	0.930233	0.697674	0.930233	0.697674	1.02713	0.128361		0.232558	0	0.232558	0.232558	0	0	0	0.232558	0.465116	0	0	0	0.116279	0.0419041
	5 Hours	1.39535	1.16279	0.697674	0.465116	1.39535	0.697674	0.968992	0.107054		2.32558	2.55814	1.62791	4.4186	1.39535	1.62791	1.86047	2.7907	2.32558	1.39535	1.62791	2.09302	2.17054	0.225401		0	0	0	0.232558	0	0	0.465116	0.232558	1.86047	0.930233	0	0	0.310078	0.150699
	6 Hours	0.697674	1.39535	0	1.39535	2.09302	1.16279	1.12403	0.190222		2.32558	2.32558	2.32558	3.25581	1.62791	1.16279	2.09302	2.32558	1.62791	1.62791	1.39535	1.86047	1.99612	0.15099		0	0.232558	0	0.232558	0	0	0.232558	0.465116	0.697674	0.697674	0.930233	0.232558	0.310078	0.0851935
	7 Hours	2.09302	1.86047	0.465116	0.930233	1.39535	0.930233	1.27907	0.165614		2.32558	1.16279	1.39535	2.32558	0.697674	0.930233	0.465116	2.55814	1.39535	1.62791	2.09302	1.86047	1.56977	0.181933		0	0	0.232558	0	0	0	0.232558	0.465116	0.232558	0.232558	0	0	0.116279	0.0419041
	8 Hours	1.39535	2.55814	0	0.232558	0.697674	0	0.813953	0.268775		4.65116	0.465116	0.930233	2.32558	0.697674	1.39535	1.16279	3.02326	1.86047	0.697674	2.32558	1.62791	1.76357	0.319636		0	0	0	0	0	0	0	0	0.232558	0.232558	0	0	0.0387597	0.0241933
	9 Hours	3.48837	2.55814	0.465116	0.232558	0.930233	0.232558	1.31783	0.368057		3.02326	1.39535	0.697674	1.86047	1.86047	0.465116	0.697674	1.62791	4.88372	3.25581	3.48837	3.95349	2.26744	0.381419		0	0.232558	0.232558	0	0	0	0.697674	0.930233	1.16279	0.465116	0.930233	0.232558	0.406977	0.11283
	10 Hours	1.86047	2.09302	1.16279	0.697674	0.465116	0.232558	1.08527	0.202993		3.02326	2.32558	2.55814	3.95349	2.32558	1.86047	2.09302	2.32558	3.25581	2.55814	3.02326	2.32558	2.63566	0.15529		0	0	0	0	0	0.232558	1.39535	0.697674	1.39535	0.697674	1.39535	0.930233	0.562016	0.160024
	11 Hours	2.09302	2.55814	0.465116	0.465116	0.232558	0.697674	1.08527	0.262718		1.86047	2.55814	1.86047	3.02326	2.55814	1.62791	3.02326	2.32558	2.32558	1.62791	1.62791	2.32558	2.22868	0.136322		0	0	0	0	0	0	0	0.465116	0.465116	0.465116	1.39535	0.232558	0.251938	0.110736
	12 Hours	0.465116	1.39535	0.697674	0.232558	0.697674	0.697674	0.697674	0.104003		3.25581	1.62791	1.16279	3.48837	1.39535	1.39535	4.4186	3.95349	1.39535	2.32558	1.62791	2.09302	2.34496	0.303865		0	0.232558	0	0	0.232558	0	0.465116	0.465116	0.232558	0.697674	0	0.465116	0.232558	0.0649175
	13 Hours	2.09302	1.62791	0.465116	0	0.465116	0.232558	0.813953	0.224959		3.48837	2.09302	1.16279	2.7907	3.72093	2.7907	3.25581	3.72093	2.55814	2.09302	3.25581	2.32558	2.77132	0.20607		0	0	0	0	0	0	0.697674	0	0.697674	0.930233	0.697674	0.232558	0.271318	0.0985711
	14 Hours	2.55814	1.62791	0.232558	0.697674	0	0	0.852713	0.277032		5.81395	2.32558	2.32558	4.4186	2.32558	1.39535	2.09302	2.55814	2.09302	2.55814	3.02326	2.7907	2.81008	0.317431		0	0	0	0	0	0	0.232558	0.465116	0.697674	0.465116	0.232558	0	0.174419	0.0655902
	15 Hours	1.39535	1.62791	0	0.465116	0.465116	0.232558	0.697674	0.175797		5.11628	0.930233	4.88372	3.25581	2.55814	2.32558	3.25581	2.55814	1.62791	1.86047	2.32558	1.86047	2.71318	0.334533		0.465116	0.232558	0	0	0	0	0.232558	0.465116	0.232558	0.465116	0.697674	0.232558	0.251938	0.0619179
	16 Hours	1.16279	1.62791	0.465116	0.697674	0.232558	0.232558	0.736434	0.149255		3.25581	2.09302	2.7907	3.72093	3.95349	2.32558	3.25581	3.25581	3.48837	2.09302	2.32558	1.16279	2.81008	0.21928		0	0	0	0	0	0	0.465116	0.232558	0.465116	0.697674	0.232558	0.697674	0.232558	0.0749603
	17 Hours	1.86047	1.39535	0.465116	0.232558	0.697674	0.465116	0.852713	0.169836		3.48837	3.25581	3.25581	3.95349	2.32558	2.32558	4.18605	3.02326	1.16279	2.7907	2.09302	1.86047	2.81008	0.237723		0.232558	0	0	0	0	0	0.465116	0	0.232558	0.465116	0.232558	0	0.135659	0.0492855
	18 Hours	2.55814	3.02326	0.930233	0.697674	0	0.697674	1.31783	0.318544		2.09302	2.32558	4.4186	2.7907	3.25581	3.02326	6.27907	2.55814	0.697674	1.86047	1.62791	1.39535	2.6938	0.397058		0.232558	0.232558	0	0	0	0	0.465116	0.697674	0	1.62791	0.930233	0.232558	0.368217	0.133721
	19 Hours	0.7	1.16279	0.697674	0.232558	0.697674	0.232558	0.620543	0.0936032		3.02326	3.48837	3.72093	3.72093	4.4186	1.86047	3.72093	2.32558	1.16279	1.16279	1.16279	1.39535	2.5969	0.325488		0	0	0.232558	0	0	0	0.465116	0.232558	0.232558	0.930233	1.16279	0.465116	0.310078	0.103778
	20 Hours	0.82	1.62791	0.930233	0.232558	0.465116	0.930233	0.834341	0.127996		3.95349	3.48837	3.48837	3.02326	6.74419	4.18605	4.18605	4.4186	1.16279	1.16279	1.86047	0.697674	3.19767	0.463698		0	0.232558	0	0	0.232558	0	0	0.697674	0.465116	0.232558	2.32558	0.930233	0.426357	0.179422
	21 Hours	0.75	1.16279	0.697674	0.465116	0.930233	0.697674	0.783915	0.06354		4.18605	4.65116	3.25581	4.4186	3.72093	3.02326	3.48837	3.02326	1.16279	0.465116	0.697674	0.697674	2.73256	0.414935		0	0	0	0	0	0	0	0.232558	0	0	0.465116	0	0.0581395	0.0386336
	22 Hours	1.45	1.39535	0.465116	0.465116	0.697674	0.465116	0.823062	0.126528		3.25581	2.7907	4.4186	2.7907	4.18605	3.95349	4.88372	3.02326	0.697674	0.697674	1.16279	1.39535	2.77132	0.394396		0	0	0	0	0.232558	0	0.465116	0.465116	1.16279	0.697674	1.39535	0.465116	0.406977	0.127446
	23 Hours	1.13	0.45	0.232558	0.930233	0.232558	1.16279	0.68969	0.116555		2.56	3.95349	3.25581	2.09302	6.04651	4.4186	4.65116	2.09302	0.697674	0.232558	0.465116	1.62791	2.67457	0.489038		0.232558	0	0	0	0	0	1.62791	0.232558	0.232558	0.930233	0.465116	0.465116	0.348837	0.13118
	24 Hours	1.2	1.2	0.232558	0.232558	0.697674	1.16279	0.787597	0.125649		2.33	2.7907	2.7907	3.48837	3.48837	4.65116	3.02326	2.32558	1.16279	0.465116	0.232558	0.697674	2.28719	0.368028		0.465116	0.232558	0	0	0	0	1.16279	0.465116	0.232558	0.465116	1.16279	0.232558	0.368217	0.110736

## Sheet: Figure 6D
Single Cell Tracking of Geminin Positive Cells
Figure 6D
Collected from 2-3 Independent Experiments per condition (multiple movie fields per experiment)
	Condition	Number of Geminin-Positive Objects Detected	G1 to S to M Objects			<= # of Objects was normalized to number of geminin-positive objects in first frame of movie
	DMSO - No Strain - 1	315	0.29
	DMSO - No Strain - 2	315	0.31
	DMSO - No Strain - 3	356	0.24
	DMSO - No Strain - 4	381	0.21
	DMSO - No Strain - 5	347	0.31
	DMSO - No Strain - 6	243	0.17
	DMSO - No Strain - 7	429	0.13
	DMSO - No Strain - 8	354	0.19
	DMSO - No Strain - 9	381	0.188
	DMSO - No Strain - 10	388	0.2
	DMSO - No Strain - 11	468	0.19
	DMSO - No Strain - 12	337	0.28
	DMSO - No Strain - 13	337	0.27
	DMSO - No Strain - 14	423	0.18
	Average		0.225571
	SEM		0.0153153
	DMSO - High Strain - 1	231	0.05
	DMSO - High Strain - 2	209	0.17
	DMSO - High Strain - 3	282	0.14
	DMSO - High Strain - 4	279	0.11
	DMSO - High Strain - 5	719	0.28
	DMSO - High Strain - 6	408	0.27
	Average		0.17
	SEM		0.0369685
	Condition	Number of Geminin-Positive Objects Detected	G1 to S Objects
	D4476 - No Strain - 1	160	0.2
	D4476 - No Strain - 2	167	0.1
	D4476 - No Strain - 3	159	0.07
	D4476 - No Strain - 4	256	0.16
	D4476 - No Strain - 5	320	0.07
	D4476 - No Strain - 6	387	0.12
	D4476 - No Strain - 7	353	0.1
	D4476 - No Strain - 8	335	0.1
	D4476 - No Strain - 9	459	0.14
	D4476 - No Strain - 10	430	0.14
	D4476 - No Strain - 11	453	0.14
	D4476 - No Strain - 12	371	0.23
	D4476 - No Strain - 13	264	0.8
	D4476 - No Strain - 14	223	0.73
	Average		0.221429
	SEM		0.0628084
	D4476 - High Strain - 1	663	0.34
	D4476 - High Strain - 2	457	0.56
	D4476 - High Strain - 3	450	0.43
	D4476 - High Strain - 4	542	1.33
	D4476 - High Strain - 5	458	0.67
	D4476 - High Strain - 6	1239	0.4
	D4476 - High Strain - 7	1315	0.6
	D4476 - High Strain - 8	1105	0.31
	D4476 - High Strain - 9	1281	0.14
	D4476 - High Strain - 10	1268	0.29
	D4476 - High Strain - 11	1227	0.25
	D4476 - High Strain - 12	1173	0.24
	Average		0.463333
	SEM		0.0789011
	Condition	Number of Geminin-Positive Objects Detected	G1 to S Objects
	D4476 + iCRT3 - NS - 1	241	0.05
	D4476 + iCRT3 - NS - 2	381	0.05
	D4476 + iCRT3 - NS - 3	624	0.04
	D4476 + iCRT3 - NS - 4	303	0
	D4476 + iCRT3 - NS - 5	264	0.01
	D4476 + iCRT3 - NS - 6	264	0.03
	D4476 + iCRT3 - NS - 7	362	0.04
	D4476 + iCRT3 - NS - 8	301	0.05
	D4476 + iCRT3 - NS - 9	337	0.06
	D4476 + iCRT3 - NS - 10	302	0.03
	D4476 + iCRT3 - NS - 11	305	0.04
	Average		0.0363636
	SEM		0.00543937
	D4476+iCRT3 - HS - 1	434	0.05
	D4476+iCRT3 - HS - 2	469	0.07
	D4476+iCRT3 - HS - 3	529	0.06
	D4476+iCRT3 - HS - 4	574	0.04
	D4476+iCRT3 - HS - 5	398	0.06
	D4476+iCRT3 - HS - 6	466	0.13
	D4476+iCRT3 - HS - 7	552	0.08
	D4476+iCRT3 - HS - 8	431	0.03
	D4476+iCRT3 - HS - 9	398	0.04
	D4476+iCRT3 - HS - 10	411	0.03
	D4476+iCRT3 - HS - 11	530	0.03
	D4476+iCRT3 - HS - 12	485	0.05
	Average		0.0558333
	SEM		0.00820738
