# Supplementary material for: Increasing β-catenin/Wnt3A activity levels drive mechanical strain-induced cell cycle progression through mitosis
Source: eLife journal article supplement (doi:10.7554/elife.19799), 2016-10-26
Supplement: supp [file elife-19799-supp-v1.zip › elife_poa_e19799_Figure_7_source_data_1.xlsx]

## Sheet: Figure 7B
% Cells Geminin Positive (No Strain)
Figure 7B
Collected from 2-3 Independent Experiments per condition (multiple movie fields per experiment)
	Condition	Average # of Cells detected per movie frame	0 Hour	1 Hour	2 Hours	3 Hours	4 Hours	5 Hours	6 Hours	7 Hours	8 Hours	9 Hours	10 Hours	11 Hours	12 Hours	13 Hours	14 Hours	15 Hours	16 Hours	17 Hours	18 Hours	19 Hours	20 Hours	21 Hours	22 Hours	23 Hours	24 Hours
	Control - No Strain - 1	1826.52	12.5604	12.3977	12.2931	12.3209	11.9007	11.22	11.3624	11.1661	11.0989	11.3856	11.1474	10.8284	11.1948	11.0232	10.7869	10.4877	10.7487	10.8004	10.0494	10.8356	10.4839	10.7296	10.636	10.8065	11.2432
	Control - No Strain - 2	1876.48	12.382	12.0267	12.1111	12.3529	11.9872	11.0994	12.4477	11.6971	10.8595	12.0778	11.58	11.1111	10.6029	10.873	10.6053	10.3958	11.6255	10.6645	10.1232	11.1765	12.1079	11.1948	11.263	10.9202	8.27851
	Control - No Strain - 3	1591.2	12.9606	12.9117	12.8725	12.4479	12.3977	12.4779	12.4481	11.7927	11.8235	12.0143	11.7015	12.1137	11.8138	11.1251	11.1442	11.4557	12.5097	12.3268	11.867	10.4732	10.7474	11.0398	10.4127	10.5464	10.2287
	Control - No Strain - 4	1648.64	12.492	11.5385	11.8916	12.5158	11.8182	10.9168	10.8254	10.9219	10.982	11.0651	10.997	10.089	10.2712	9.76471	10.4567	9.77573	9.13405	9.8401	9.69962	8.94161	9.29803	8.70098	9.00563	8.08961	8.33333
	Control - No Strain - 5	1619.12	11.3352	11.065	10.7094	10.4719	10.3189	9.92647	7.43243	8.04307	8.58209	7.71192	7.71192	8.25062	8.45771	6.67071	7.79927	7.67857	6.16359	7.97401	8.17246	7.26846	6.86671	6.11765	6.27262	6.43678	6.69056
	Control - No Strain - 6	1646.16	12.9386	11.7161	12.605	12.5083	11.2382	11.4997	11.0745	11.5533	10.958	9.92862	9.93711	10.2181	9.11425	9.21771	8.19876	7.85219	7.57972	7.66345	8	8.18713	7.32807	7.45708	6.51934	6.60629	6.86486
	Control - No Strain - 7	1866.12	13.9359	12.7178	14.5787	14.2227	12.9032	13.1253	12.845	12.9836	12.2742	11.212	10.8021	11.2283	10.5996	10.5795	10.2949	11.6119	10.5291	10.975	10.8351	11.0638	10.0962	10.6037	10.0849	11.1168	10.0253
	Control - No Strain - 8	1679.72	12.7003	11.5385	11.3797	12.2063	12.2129	12.2867	12.4643	11.5473	11.8203	11.0912	11.0397	11.014	11.1846	10.4229	10.9654	10.9489	11.055	11.5651	11.4489	11.1252	10.3985	9.71974	9.71463	9.16569	9.59219
	Control - No Strain - 9	1892.68	11.7716	11.4602	11.194	10.8301	10.7105	10.1239	9.96819	9.70266	9.60042	9.40748	9.60744	9.41176	9.11917	9.18947	9.33126	8.68217	8.74741	8.66808	8.53659	8.51528	8.24411	8.22199	7.90274	7.93809	8.05639
	Control - No Strain - 10	1850.2	13.2665	12.7797	12.4429	12.8872	13.4146	12.8872	12.6304	12.4247	12.0502	11.8554	11.2661	10.8498	10.9677	10.739	10.2483	9.5941	9.58115	9.32339	9.04762	8.93617	8.68184	8.4419	7.99585	7.70048	8.21845
	Control - No Strain - 11	1983.36	12.8814	12.3614	12.0488	12.3444	12.3196	12.2798	12.1151	11.9615	11.9266	11.4458	11.3283	10.8631	10.7784	10.3635	10.4605	9.99503	9.69638	9.42643	9.1187	9.0636	8.71948	8.23066	7.91262	7.94798	7.58004
	Control - No Strain - 12	1809.36	11.1045	10.8774	10.7623	11.1741	11.3598	10.9305	11.0924	11.2217	10.9253	10.7025	10.4494	10.4945	10.1847	9.99454	9.41434	9.26829	8.95279	8.94794	9.07582	8.66406	8.30249	8.18084	7.90043	7.50529	7.979
	Average		12.5274	11.9492	12.0741	12.1902	11.8818	11.5645	11.3922	11.2513	11.0751	10.8248	10.6307	10.5394	10.3574	9.99693	9.97548	9.81217	9.69358	9.84793	9.66453	9.52088	9.27288	9.05323	8.8017	8.73167	8.59089
	SEM		0.214457	0.18279	0.282057	0.264733	0.234616	0.278826	0.409033	0.345288	0.287293	0.337512	0.297351	0.262455	0.266046	0.329068	0.286795	0.342621	0.470054	0.385415	0.332825	0.358706	0.40971	0.426272	0.435481	0.457775	0.372362
	Wnt3A - No Strain - 1	1818.56	14.6053	15.5869	15.022	15.0735	15.2421	14.6007	14.5551	14.4287	14.1705	13.4278	13.9077	13.5603	13.3623	13.7763	13.44	14.0733	14.6392	14.8752	15.3607	15.9168	14.9927	14.8668	15.081	14.5481	14.0318
	Wnt3A - No Strain - 2	1625.28	10.5103	10.3422	9.57046	12.7907	12.5346	13.1402	12.4916	13.1647	13.3843	13.9502	12.8737	13.4764	13.396	13.8422	13.297	13.3621	14.3643	14.5276	15.2201	15.8207	15.889	14.8819	15.0372	13.8346	14.3331
	Wnt3A - No Strain - 3	1835	11.4509	11.5714	9.91053	10.3403	11.4425	11.0246	11.4861	11.645	11.8823	12.2647	11.887	11.7829	12.1273	13.4894	13.1115	13.6428	14.626	14.7265	16.2533	18.0328	16.4391	16.9623	14.7869	14.5692	15.1272
	Wnt3A - No Strain - 4	1878.8	8.10631	8.62516	8.73418	10.0985	10.0663	10.6866	11.3962	12.0778	12.1759	11.7974	12.7155	12.5265	12.776	13.1113	13.4929	14.2929	14.9425	15.3846	15.792	16.9542	16.7457	16.9476	16.3789	16.4131	16.1744
	Wnt3A - No Strain - 5	1863.6	14.3791	14.2045	13.7761	13.5334	13.9398	13.6762	13.7891	13.862	13.7188	14.1026	13.6691	13.6964	13.4345	13.9423	14.089	14.2709	14.2571	14.8525	14.4131	14.7809	14.8004	14.4595	14.7776	14.9261	13.9578
	Wnt3A - No Strain - 6	1550.56	12.7362	14.0507	14.1034	13.8111	13.8201	13.4541	12.4356	13.0914	12.6615	13.307	13.1406	13.8043	13.7039	14.0544	14.5327	14.7415	15.0065	14.8666	15.0606	15.3086	15.1852	15.0897	15.0908	15.2094	15.3748
	Wnt3A - No Strain - 7	1789.12	8.9651	10.0295	9.59302	9.20978	9.12125	8.63586	8.3878	8.19316	7.92975	7.99347	7.80669	7.68398	7.56348	7.86885	7.72603	7.38328	6.87743	7.15522	7.03037	6.97541	7.0028	6.78551	6.68954	6.80115	6.53557
	Wnt3A - No Strain - 8	1881.44	8.47937	7.78082	7.62943	7.73333	6.95742	6.88956	6.85422	6.47265	6.98712	6.4759	6.52715	6.62285	6.57828	6.60861	6.36411	6.24672	6.29447	6	6.47841	6.32432	5.87912	5.9761	6.05546	5.86868	5.58087
	Wnt3A - No Strain - 9	1703.6	8.61557	8.43514	8.66051	8.0767	8.40093	8.1728	8.16213	7.99074	7.51542	7.35043	7.39232	7.08263	7.16366	7.33256	7.414	7.33138	7.49129	7.39679	7.67372	7.99508	7.30539	6.65054	6.96671	7.02736	6.53266
	Wnt3A - No Strain - 10	1647.72	7.39812	7.50605	7.24285	7.65125	7.61452	7.11194	6.76157	6.48038	6.23896	6.05526	6.05882	5.84112	5.83681	6.21266	5.94727	6.18047	6.21981	5.90769	5.90383	6.35018	6.49752	6.36588	6.34024	6.39098	6.18622
	Wnt3A - No Strain - 11	1497.16	12.3882	12.2717	11.4927	11.6107	11.2824	11.3208	10.78	10.5938	10.5897	10.9815	10.3583	10.3113	10.4881	9.78189	8.97184	8.8042	9.31759	9.34326	8.13793	8.59917	8.51986	8.78518	9.01143	8.65513	8.76359
	Wnt3A - No Strain - 12	1698.68	11.4216	11.6637	11.6891	11.1314	10.5764	10.0358	9.65876	9.55451	8.96785	8.6351	8.61969	8.70787	8.66097	8.41924	8.1239	7.33104	7.11322	7.19465	7.90051	7.10094	7.30102	7.88699	7.58541	7.20721	7.24218
	Wnt3A - No Strain - 13	1676.48	9.86193	10.7534	10.4881	10.0248	9.44742	9.25466	9.14077	8.9441	8.13817	8.09353	7.65156	8.00942	8.28796	8.15962	7.65521	8.19355	8.00733	7.83982	7.46432	7.77465	7.67045	7.93379	7.48225	7.74232	7.19424
	Average		10.686	10.9863	10.6087	10.8527	10.8035	10.6157	10.4538	10.4999	10.3354	10.3411	10.2006	10.2389	10.2599	10.5076	10.3204	10.4503	10.7044	10.7746	10.9761	11.3795	11.0945	11.0455	10.868	10.7072	10.5411
	SEM		0.633953	0.686703	0.662776	0.64579	0.682561	0.683924	0.675025	0.738695	0.752521	0.799758	0.786863	0.809256	0.800633	0.855462	0.886718	0.951633	1.03501	1.07906	1.14188	1.25212	1.19853	1.18774	1.1339	1.10778	1.13204

## Sheet: Figure 7C
% Cells Geminin Positive (High Strain)
Figure 7C
Collected from 2-3 Independent Experiments per condition (multiple movie fields per experiment)
	Condition	Average # of Cells detected per movie frame	0 Hour	1 Hour	2 Hours	3 Hours	4 Hours	5 Hours	6 Hours	7 Hours	8 Hours	9 Hours	10 Hours	11 Hours	12 Hours	13 Hours	14 Hours	15 Hours	16 Hours	17 Hours	18 Hours	19 Hours	20 Hours	21 Hours	22 Hours	23 Hours	24 Hours
	Control - High Strain - 1	1051.04	10.5976	11.9481	12.5498	13.8967	13.4454	14.0036	13.7343	14.9267	15.4135	15.5204	16.2362	17.0664	18.1125	18.9555	19.1388	19.0341	20.6107	20.8843	21.8779	21.4354	22.4665	23.2055	25.4511	25.3891	26.0556
	Control - High Strain - 2	1127.68	10.7744	12.7976	12.6267	12.5984	13.2671	12.7451	12.8228	12.9597	12.6799	12.8748	12.9992	13.2239	13.9842	15.1786	16.1463	15.5955	16.1319	15.9758	17.6909	18.5115	19.0019	19.1993	20.0382	19.0566	20.8333
	Control - High Strain - 3	1265.56	12.7841	12.6248	13.2162	12.7737	13.1054	13.2331	13.5464	14.1797	14.5371	15.6128	15.5622	15.6366	16.879	16.7472	17.7632	17.1405	19.0153	18.7602	19.9501	20.8054	20.2691	21.7277	22.9537	24.6753	25
	Control - High Strain - 4	1146	11.4163	9.91105	12.9907	13.7631	13.9145	14.5631	14.6597	15.1434	14.7321	15.4386	15.1643	15.8516	15.7983	17.1099	17.6044	17.87	18.3379	19.606	20.0547	20.3822	20.4207	22.0791	22.5806	23.3522	24.4375
	Control - High Strain - 5	1204.6	13.0403	12.7221	12.8448	14.1667	14.9728	15.5466	14.8208	15.403	15.3414	15.6816	16.7832	17.6236	17.5536	17.1667	18.1373	19.4444	19.8624	21.0658	20.8441	21.743	23.1037	23.6794	24.9767	29.0284	28.25
	Control - High Strain - 6	1163	11.5789	11.2793	11.9266	13.6134	13.8069	13.4096	13.206	13.6986	14.8747	14.065	14.8515	14.8883	16.494	16.8291	17.1902	18.9548	19.3345	20.6867	21.9166	22.1815	23.2864	24.955	26.1494	29.2085	30
	Control - High Strain - 7	1489.24	10.3729	10.7264	12.1463	12.9275	14.3531	14.6261	14.8515	15.415	15.1337	14.9581	15.5427	15.4746	15.2895	15.1899	15.1088	15.6481	15.7931	16.6197	16.3649	15.8773	15.6768	15.7932	15.6904	16.5963	16.6203
	Control - High Strain - 8	1436.64	10.2439	10.3851	11.0814	12.8988	12.9396	13.8092	13.3246	14.2764	14.9708	14.3697	15.2443	15.0783	15.5284	16.1755	15.9304	16.7498	17.5556	18.2438	18.6065	17.9688	17.5182	18.5157	19.3252	19.1506	19.4145
	Control - High Strain - 9	1256.16	11.2384	12.0801	13.8125	14.767	16.0946	16.4639	16.4634	17.0242	17.0934	17.0027	17.7163	17.1006	18.2385	19.237	18.6719	20.1472	19.7331	20.2358	20.3374	19.6172	19.4956	20.6573	20.4611	21.0233	21.1345
	Control - High Strain - 10	1400.96	12.6819	13.8194	15.8537	17.0437	17.0977	18.4154	18.0707	18.8098	18.9502	18.9281	19.2872	18.9573	19.4703	18.5982	18.3165	19.0131	18.4571	18.7821	18.578	18.4704	18.9345	19.3333	19.9098	20.0456	19.4973
	Control - High Strain - 11	1381.08	13.2104	15.5294	17.9706	19.0102	19.7828	20.6337	20.2426	20.8333	21.5315	20.9895	20.2614	20.9503	20.4965	20.3678	20.0964	20.562	20.6281	20.3343	20.1404	19.5697	19.8068	19.8479	20.3704	19.7135	19.6369
	Control - High Strain - 12	1422.88	10.9145	12.0181	13.3525	15.0365	15.7133	16.3309	17.3091	17.9412	17.9266	18.8331	18.2828	18.6047	18.1366	18.593	17.9919	18.3217	18.1511	18.4174	18.479	18.6294	18.9333	18.7251	18.6139	18.3633	18.6047
	Average		11.5711	12.1535	13.3643	14.3747	14.8744	15.315	15.2543	15.8843	16.0987	16.1895	16.4943	16.7047	17.1651	17.5123	17.6747	18.2068	18.6342	19.1343	19.57	19.5993	19.9095	20.6432	21.3767	22.1336	22.457
	SEM		0.442046	0.629512	0.758951	0.782574	0.826349	0.952692	0.939547	0.948054	0.974802	0.954419	0.842564	0.864131	0.761495	0.668771	0.576543	0.668445	0.640591	0.673624	0.681537	0.744818	0.913523	1.05726	1.26878	1.7004	1.7103
	Wnt3A - High Strain - 1	1569.52	13.0404	13.8676	15.2531	15.0198	14.6693	14.4317	14.4737	14.5283	12.979	13.2145	12.5466	12.9405	13.0408	13.8536	14.6168	15.98	16	16.7055	18.8375	18.8299	18.4941	17.1951	18.0819	19.6856	20.0272
	Wnt3A - High Strain - 2	1473.84	14.0089	14.574	15.5825	14.8814	14.6809	14.2276	14.1319	13.8348	13.9232	13.8743	13.7102	13.7736	14.1081	14.6607	15.2398	17.1992	16.8498	18.3659	19.1186	19.2202	19.3205	19.6564	20.7163	21.1158	23.0475
	Wnt3A - High Strain - 3	1577.76	13.2935	13.573	14.8014	14.9306	14.9564	14.6614	14.4057	13.8677	13.8714	14.4623	14.794	15.4082	16.1132	17.7918	17.4603	19.3189	19.6711	21.519	21.726	22.1292	22.7411	23.0126	24.3536	25.1523	27.3174
	Wnt3A - High Strain - 4	1518.92	14.052	15.0655	14.8122	15.0628	14.8603	14.8548	14.7976	14.2485	14.1558	14.6501	14.5953	15.1923	15.4096	16.447	17.2522	18.0573	18.6389	19.5018	21.315	21.4035	21.0354	21.4375	22.1598	23.4727	24.3581
	Wnt3A - High Strain - 5	1481.84	9.12951	10.0996	10.663	10.7483	11	11.2205	11.3443	11.953	12.5246	13.0406	13.9165	15.4427	17.2652	18.9116	20.5434	23.2589	24.1447	25.3595	26.5406	28.055	27.9895	27.8993	28.4404	30.0866	30.2632
	Wnt3A - High Strain - 6	1326.76	12.0676	13.7905	14.6927	14.7845	15.1137	15.2221	15.7475	16.7766	17.0836	18.0147	18.8321	20.8394	23.0116	25.1914	26.3948	28.1709	30.3676	32.1944	32.9412	34.4171	37.0136	34.5902	34.6154	34.3824	35.3896
	Wnt3A - High Strain - 7	1481.76	13.8228	15.189	16.0632	17.5963	18.1017	18.2107	18.3428	19.6633	19.8039	20.3728	21.6179	23.4416	23.6074	25.7329	27.1605	29.318	30.974	32.3962	34.5272	35.1601	37.2333	36.1837	38.9374	37.5	40.2872
	Wnt3A - High Strain - 8	1802.44	14.5152	17.1076	17.5973	18.3263	18.8336	18.5654	18.7913	19.6756	21.1151	21.8173	22.8988	23.6176	24.6793	27.2777	28.9274	30.825	32.7557	34.5299	35.6818	37.3264	39.7693	42.821	44.9375	45.1151	49.3867
	Wnt3A - High Strain - 9	1690.08	13.1704	16.1575	18.3857	20.1546	20.3642	20.3143	20.9055	22.9393	24.065	25.7699	27.377	29.9338	32.5157	33.8792	36	37	39.0625	41.8125	41.8079	42.6837	44.9187	45.3649	47.9653	49.2662	50.2833
	Wnt3A - High Strain - 10	1613.96	12.8161	15.7895	16.8415	17.8158	18.8029	19.8513	20.5128	22.3295	22.6832	24.3956	24.69	26.6996	29.7626	32.2953	34.3422	35.0269	37.2368	38.0064	40.3134	41.5028	44.5634	44.213	46.3158	48.8183	49.0969
	Wnt3A - High Strain - 11	1803.48	10.1038	13.1713	13.984	16.1382	16.3546	17.0693	17.4322	17.4091	17.8068	19.1671	20.4931	21.7226	23.234	23.719	24.0106	25.8621	26.3357	27.9182	28.5311	30.1876	32.1614	34.318	36.102	35.5188	37.1188
	Wnt3A - High Strain - 12	1771.04	9.1314	11.8967	11.9881	13.5472	13.777	13.731	13.7156	14.4671	14.3548	15.9412	16.7545	18.5946	19.13	21.061	21.1994	22.2646	22.7686	23.7534	25.3265	25.7159	27.5862	28.8095	30.9215	32.3816	33.3546
	Wnt3A - High Strain - 13	1362.24	11.1796	12.2102	12.9644	13.1599	13.3678	13.4938	13.2653	13.5311	13.6896	13.5447	14.2549	15.1799	15.6472	16.4343	16.6305	17.1139	17.4319	17.4805	18.1688	18.2014	18.963	19.4465	20.6015	22.9596	24.3264
	Wnt3A - High Strain - 14	1350.92	11.6099	13.1148	13.0137	14.2965	13.1893	12.8243	12.8561	12.9386	13.5667	13.6789	13.925	14.1109	14.6696	14.6059	15.379	15.3734	15.8545	16.365	16.9034	17.4743	18.8816	19.6078	20.8272	22.1877	25.1634
	Wnt3A - High Strain - 15	1352.16	13.2388	14.1036	14.6154	15.5539	16.0061	15.9614	16.1148	16.9755	16.5685	16.9755	16.3476	17.1886	17.3257	17.1388	18.7189	18.2206	18.8077	19.2225	20.4097	20.0144	20.0437	20.5948	22.9042	23.5069	25.0939
	Wnt3A - High Strain - 16	1437.2	11.7211	13.6637	14.2857	14.5336	14.7292	15.1665	15.2661	15.1325	15.3103	15.5494	15.989	16.5419	16.499	16.8919	16.6329	17.6471	17.1352	17.4582	17.5639	18.2369	19.2862	19.6949	20.5575	21.6045	23.3213
	Wnt3A - High Strain - 17	1429.12	10.0656	11.473	12.3563	12.0665	12.1622	12.202	12.6741	12.9371	13.3615	13.7955	14.4444	14.8863	15.0241	15.3103	16.0191	16.9294	18.2065	17.8767	18.6986	19.1197	20	21.1003	22.1448	24.0649	25.6815
	Wnt3A - High Strain - 18	1419.36	10.9363	11.6893	12.7502	13.6198	13.6558	13.766	13.885	14.3855	14.3557	14.952	15.5102	16.3834	16.4169	16.9178	17.4331	18.5982	18.4903	19.3213	19.697	19.9036	21.0709	21.9427	22.7994	23.6536	26.892
	Average		12.1057	13.6965	14.4806	15.1242	15.2569	15.3208	15.4812	15.9774	16.1788	16.8454	17.3721	18.4387	19.3033	20.4511	21.3312	22.5647	23.374	24.4326	25.4505	26.0879	27.2818	27.6604	29.0767	30.0262	31.6894
	SEM		0.428168	0.450235	0.500577	0.570391	0.614862	0.640347	0.678264	0.813675	0.883024	0.984957	1.07456	1.21396	1.39534	1.53872	1.66412	1.71001	1.89618	2.02287	2.05576	2.16168	2.37304	2.37866	2.48935	2.4371	2.45312

## Sheet: Figure 7D
Single Cell Tracking of Geminin Positive Cells
Figure 7D
Collected from 2-3 Independent Experiments per condition (multiple movie fields per experiment)
	Condition	Number of Geminin-Positive Objects Detected	G1 to S to M Objects			<= # of Objects was normalized to number of geminin-positive objects in first frame of movie
	Control - No Strain - 1	260	0.85
	Control - No Strain - 2	285	0.37
	Control - No Strain - 3	298	0.53
	Control - No Strain - 4	247	0.58
	Control - No Strain - 5	241	0.68
	Control - No Strain - 6	277	0.63
	Control - No Strain - 7	286	0.6
	Control - No Strain - 8	374	0.54
	Control - No Strain - 9	316	0.47
	Control - No Strain - 10	289	0.67
	Control - No Strain - 11	303	0.57
	Control - No Strain - 12	288	0.5
	Average		0.5825
	SEM		0.0322958
	Control - High Strain - 1	301	6.25
	Control - High Strain - 2	378	1.24
	Control - High Strain - 3	460	1.34
	Control - High Strain - 4	431	1.42
	Control - High Strain - 5	512	1.21
	Control - High Strain - 6	456	1.48
	Control - High Strain - 7	396	1.11
	Control - High Strain - 8	414	1.27
	Control - High Strain - 9	454	0.92
	Control - High Strain - 10	497	0.81
	Control - High Strain - 11	520	1
	Control - High Strain - 12	480	1.31
	Average		1.61333
	SEM		0.601716
	Condition	Number of Geminin-Positive Objects Detected	G1 to S Objects
	Wnt3A - No Strain - 1	722	1.13
	Wnt3A - No Strain - 2	672	1.64
	Wnt3A - No Strain - 3	682	1.81
	Wnt3A - No Strain - 4	726	1.68
	Wnt3A - No Strain - 5	676	0.91
	Wnt3A - No Strain - 6	572	1.04
	Wnt3A - No Strain - 7	217	0.82
	Wnt3A - No Strain - 8	206	0.81
	Wnt3A - No Strain - 9	218	0.9
	Wnt3A - No Strain - 10	162	1
	Wnt3A - No Strain - 11	259	0.66
	Wnt3A - No Strain - 12	250	0.7
	Average		1.09167
	SEM		0.106233
	Wnt3A - High Strain - 1	567	1.31
	Wnt3A - High Strain - 2	585	1.48
	Wnt3A - High Strain - 3	678	2.09
	Wnt3A - High Strain - 4	616	1.95
	Wnt3A - High Strain - 5	667	3.96
	Wnt3A - High Strain - 6	748	3.47
	Wnt3A - High Strain - 7	1079	2.99
	Wnt3A - High Strain - 8	1254	2.82
	Wnt3A - High Strain - 9	1351	3.16
	Wnt3A - High Strain - 10	1254	3.09
	Wnt3A - High Strain - 11	1048	2.93
	Wnt3A - High Strain - 12	925	2.91
	Wnt3A - High Strain - 13	772	3.51
	Wnt3A - High Strain - 14	447	2.23
	Wnt3A - High Strain - 15	454	2.1
	Wnt3A - High Strain - 16	506	1.83
	Wnt3A - High Strain - 17	472	2.27
	Wnt3A - High Strain - 18	468	2.83
	Average		2.60722
	SEM		0.183267

## Sheet: Fig.7 - Supplement 1B
% Cells TOPdGFP Positive
Figure 7 - Supplement 1B
Collected from 3 Independent Experiments
		Control - 0% Strain		Wnt3A - 0% Strain		Control - 15% Strain		Wnt3A - 15% Strain
		# Cells Analyzed	% Cells Positive	# Cells Analyzed	% Cells Positive	# Cells Analyzed	% Cells Positive	# Cells Analyzed	% Cells Positive
	Replicate 1	2021	9.4	1786	15.22	2333	17.95	2187	26.2
	Replicate 2	1613	8.23	1858	14.9	1639	16.47	2027	19.09
	Replicate 3	1336	9.43	1320	17.65	1145	14.75	1311	28.83
	Replicate 4	1137	7.91	1361	14.54	1004	17.52	354	23.25
	Average		8.7425		15.5775		16.6725		24.3425
	SEM		0.454689		0.813666		0.822413		2.41224

## Sheet: Fig.7 - Supplement 1D
pY654 Intensity (Total Image Intensity)
Figure 7 - Supplement 1D
Collected from 3 Independent Experiments
		Control		Wnt3A
		0% Strain	15% Strain	0% Strain	15% Strain
	Average	1.3372	2.30466	1.39126	2.36468		Note: Intensity values were normalized to minimum pixel intensity of no strain condition to isolate effect of strain on pY654 levels
	SEM	0.0421253	0.0661041	0.0490524	0.163266
	Image intensity data extend downwards…	1.56122	2.30786	1.25933	1.49695
	* Break indicates new independent experiment	1.27955	2.40552	1.13238	1.53428
	* Each value is single field intensity value	1.08705	2.46709	1	1.2539
		1.14579	1.86553	1.25662	1.41955
		1.47983	2.48762	1.34759	1.27495
		1.56051	2.44303	1.24576	1.61914
		1.65959	2.62491	1.27495	1.71826
		1.30219	2.03609	1.19688	2.03734
		1.30856	2.27318	1.13714	1.90496
		1.3305	2.16348	1.5981	1.91446
		1.30361	1.88677	1.67481	2.03734
		1.15216	2.30502	1.49559	1.48948
		1.37367	1.74664	1.51188	2.91989
		1.1472	1.98797	1.74542	2.47115
		1.00212	1.98655	1.25051	3.24033
		1.35103	2.22788	1.81874	3.56144
		1.8075	2.53362	1.51595	3.13781
		1.56617	2.17976	1.30686	2.48337
		1.2937	2.40764	1.13714	3.42227
		1.25053		1.31365	3.23014
		1.3397	2.50602	1.83367	3.39715
		1.57113	2.80679	1.60896	2.89274
		1.21939	3.17127	1.60828	3.04752
		1	2.18684	1.12016	3.24779
		1.64968	3.05166	1.52206	2.8296
		2.1104	2.4041	1.51052	2.60489
		1.88323	2.39915	1.87373	3.15954
		1.76858	2.26398	1.27699	2.92804
