# Supplementary material for: Increasing β-catenin/Wnt3A activity levels drive mechanical strain-induced cell cycle progression through mitosis
Source: eLife journal article supplement (doi:10.7554/elife.19799), 2016-10-26
Supplement: supp [file elife-19799-supp-v1.zip › elife_poa_e19799_Figure_8_source_data_1.xlsx]

## Sheet: Figure 8B
# Mitotic Events per .1 mm square (No Strain)
Figure 8B
Collected from 2-3 Independent Experiments (multiple movie fields per experiment)
	Condition	Control - No Strain - 1	Control - No Strain - 2	Control - No Strain - 3	Control - No Strain - 4	Control - No Strain - 5	Control - No Strain - 6	Control - No Strain - 7	Control - No Strain - 8	Control - No Strain - 9	Control - No Strain - 10	Control - No Strain - 11	Control - No Strain - 12	Average	SEM		Wnt3A - No Strain - 1	Wnt3A - No Strain - 2	Wnt3A - No Strain - 3	Wnt3A - No Strain - 4	Wnt3A - No Strain - 5	Wnt3A - No Strain - 6	Wnt3A - No Strain - 7	Wnt3A - No Strain - 8	Wnt3A - No Strain - 9	Wnt3A - No Strain - 10	Wnt3A - No Strain - 11	Wnt3A - No Strain - 12	Wnt3A - No Strain - 13	Average	SEM
	1 Hour	0.232558	0.465116	0.232558	0.232558	0	0.465116	0.465116	0.697674	0.465116	0.930233	0.232558	0.465116	0.406977	0.0578452		1.16279	1.39535	1.16279	1.86047	1.39535	1.39535	0.232558	0	0.232558	0.465116	0.232558	0.232558	0.697674	0.805009	0.169868
	2 Hours	0.232558	0.465116	0.697674	0.465116	0.465116	0.697674	0.930233	0.930233	0.930233	0.697674	0.465116	1.16279	0.678295	0.0638315		1.16279	1.39535	2.09302	0.697674	2.32558	0.697674	0.232558	0	0.232558	0	0.232558	0	0	0.697674	0.224981
	3 Hours	0.697674	1.16279	0.232558	0.465116	0.697674	0.465116	1.16279	0.232558	0	1.39535	0.232558	1.16279	0.658915	0.109213		0.465116	1.16279	1.62791	0.930233	0.930233	1.16279	0.465116	0.930233	1.16279	0.465116	0	0.697674	0.697674	0.822898	0.116623
	4 Hours	0.930233	1.39535	0.697674	1.16279	1.39535	1.16279	0.697674	0.930233	1.16279	0.930233	0.465116	0	0.910853	0.0948215		0.930233	1.86047	1.62791	1.86047	3.25581	1.39535	1.62791	2.55814	0.697674	0.697674	0.930233	0.697674	0.232558	1.41324	0.234727
	5 Hours	0.697674	1.16279	0.697674	0.697674	0.697674	1.39535	0.697674	0.465116	0.465116	1.39535	0.465116	0.465116	0.775194	0.0820832		2.7907	2.55814	1.16279	2.7907	3.02326	2.09302	1.86047	0.232558	0.930233	1.39535	1.62791	1.16279	1.86047	1.8068	0.231293
	6 Hours	0.930233	0.697674	0.930233	0.697674	1.39535	1.16279	1.39535	0.930233	0.697674	1.39535	1.39535	1.39535	1.08527	0.0714056		3.02326	2.7907	1.86047	2.55814	1.16279	1.62791	0.930233	1.62791	0.465116	0.465116	1.39535	1.62791	0.930233	1.57424	0.228276
	7 Hours	0.232558	0.465116	0.465116	0.697674	0.930233	0.930233	1.86047	1.86047	0.465116	1.62791	1.39535	1.16279	1.00775	0.134944		2.09302	1.86047	2.55814	2.09302	1.62791	1.16279	1.16279	1.16279	1.16279	0.697674	1.39535	1.39535	1.39535	1.52057	0.140859
	8 Hours	0.232558	0.930233	0.697674	0.465116	0.465116	0.930233	1.39535	0.930233	0.697674	0.930233	1.16279	1.16279	0.833333	0.0791179		2.09302	1.62791	1.39535	1.39535	1.62791	1.16279	0.697674	0.465116	1.16279	1.16279	1.16279	1.16279	0.930233	1.23435	0.115935
	9 Hours	0.232558	0	0	0	0	0.465116	0.930233	0.697674	1.16279	1.16279	1.16279	0.465116	0.523256	0.114802		1.86047	1.86047	1.39535	1.62791	1.62791	1.16279	0.465116	0.697674	0.697674	0.232558	1.62791	0.930233	0.465116	1.12701	0.159838
	10 Hours	0.465116	0.697674	0.930233	0.465116	0.697674	1.16279	0.697674	1.16279	0.465116	0.930233	0.465116	0.930233	0.755814	0.0623888		1.39535	1.86047	1.62791	0.465116	1.16279	2.09302	0.465116	0.697674	0.697674	0.697674	0.465116	1.16279	0.232558	1.00179	0.165252
	11 Hours	0.930233	0.930233	1.16279	1.39535	0.697674	1.39535	0.930233	0.465116	1.16279	1.39535	0.697674	1.16279	1.02713	0.0718822		1.62791	2.09302	1.86047	1.86047	2.09302	0.930233	1.16279	0.465116	0.232558	0.930233	1.16279	0.930233	0.465116	1.21646	0.176942
	12 Hours	0.697674	0.930233	0.232558	0.930233	0.465116	0.930233	0.930233	0.697674	0.697674	0.697674	0.697674	1.86047	0.813953	0.0920195		1.86047	1.62791	1.16279	1.16279	1.16279	0.465116	0.697674	0.930233	0.697674	0.465116	0.697674	0.930233	0.930233	0.9839	0.115242
	13 Hours	1.39535	0.232558	0.697674	0.232558	0.930233	0.697674	1.16279	0.930233	0.697674	0	0.930233	1.16279	0.755814	0.0995068		0.930233	2.7907	1.62791	1.62791	0.930233	0.697674	0.930233	0.697674	0.697674	0.465116	0.465116	0.930233	1.16279	1.07335	0.175732
	14 Hours	0.930233	1.16279	0.697674	0.930233	0.930233	0.930233	0.697674	0.697674	0.465116	0.465116	1.16279	0.697674	0.813953	0.0548145		0.930233	0.930233	0.232558	0.232558	1.62791	0	2.32558	1.16279	1.16279	0.697674	0.465116	1.16279	0.930233	0.912343	0.173595
	15 Hours	0.465116	1.16279	1.16279	0.930233	1.39535	0.930233	1.39535	0.930233	0.697674	1.39535	1.39535	0.465116	1.02713	0.0824981		0	0.465116	0.465116	0	0.465116	0.232558	1.16279	1.39535	0.930233	0.697674	0.930233	0.697674	0.465116	0.608229	0.116394
	16 Hours	0.697674	0.930233	0	0.930233	0.930233	1.16279	0.232558	0.697674	0.232558	0.697674	0.930233	0.697674	0.678295	0.0824981		0	0	0	0	0.232558	0	1.16279	0.930233	0.930233	0.697674	1.62791	0.697674	0.697674	0.536673	0.149849
	17 Hours	1.16279	0.697674	0.465116	0.930233	0.465116	0.930233	0.697674	0.232558	0.697674	1.16279	1.62791	1.39535	0.872093	0.0967229		0	0	0	0.232558	0	0	1.39535	0.232558	0.697674	0.697674	0.465116	0.697674	0.930233	0.411449	0.123939
	18 Hours	0.697674	0.930233	0.465116	0.697674	0.697674	0.697674	1.16279	0.465116	1.39535	1.86047	1.62791	1.39535	1.00775	0.110456		0	0.232558	0.232558	0	0	0	1.16279	0.930233	0	1.16279	1.16279	1.16279	1.16279	0.554562	0.154752
	19 Hours	0.465116	0.697674	0.930233	0.697674	0.697674	0.232558	1.39535	0.697674	0.930233	1.62791	0.930233	1.62791	0.910853	0.103102		0.232558	0	0	0	0	0	0.930233	0.232558	0.697674	0	0.697674	0.697674	0.465116	0.304114	0.0963357
	20 Hours	1.16279	0.930233	0.697674	0.465116	0.465116	0.697674	0.930233	0.697674	1.39535	1.39535	1.16279	0.697674	0.891473	0.0769299		0	0	0	0	0	0.232558	1.16279	0.697674	0.465116	0.465116	0.930233	0.465116	1.16279	0.429338	0.123076
	21 Hours	0.930233	0.697674	0.232558	0.930233	0.930233	0.697674	1.62791	0.697674	0.232558	0.930233	1.16279	1.39535	0.872093	0.0967229		0	0	0	0	0.232558	0	1.16279	0.697674	0.930233	0.930233	0.465116	1.16279	0.465116	0.465116	0.129
	22 Hours	0.697674	0.232558	0.465116	0.930233	1.16279	0.697674	0.697674	0.465116	0.465116	0.697674	0.930233	0.465116	0.658915	0.0610985		0	0	0	0	0.232558	0	1.39535	0.465116	0.930233	0.697674	0.465116	1.16279	0.232558	0.429338	0.13387
	23 Hours	0.465116	0.930233	0.232558	0.465116	0.697674	0.465116	0.465116	0.232558	0.465116	0.465116	1.16279	1.16279	0.600775	0.0755867		0	0	0	0	0.232558	0	1.16279	0.465116	0.930233	0.697674	1.39535	1.16279	0.697674	0.518784	0.144596
	24 Hours	0.465116	1.39535	0.697674	0.232558	0.930233	0.465116	0.232558	0.465116	0.232558	0.930233	0.697674	0.232558	0.581395	0.0858778		0.232558	0	0	0	0	0	0.697674	0.465116	0.232558	0.232558	0.697674	0.930233	1.16279	0.357782	0.110517

## Sheet: Figure 8C
# Mitotic Events per .1 mm square (High Strain)
Figure 8C
Collected from 2-3 Independent Experiments (multiple movie fields per experiment)
	Condition	Control - High Strain - 1	Control - High Strain - 2	Control - High Strain - 3	Control - High Strain - 4	Control - High Strain - 5	Control - High Strain - 6	Control - High Strain - 7	Control - High Strain - 8	Control - High Strain - 9	Control - High Strain - 10	Control - High Strain - 11	Control - High Strain - 12	Average	SEM		Wnt3A - High Strain - 1	Wnt3A - High Strain - 2	Wnt3A - High Strain - 3	Wnt3A - High Strain - 4	Wnt3A - High Strain - 5	Wnt3A - High Strain - 6	Wnt3A - High Strain - 7	Wnt3A - High Strain - 8	Wnt3A - High Strain - 9	Wnt3A - High Strain - 10	Wnt3A - High Strain - 11	Wnt3A - High Strain - 12	Wnt3A - High Strain - 13	Wnt3A - High Strain - 14	Wnt3A - High Strain - 15	Wnt3A - High Strain - 16	Wnt3A - High Strain - 17	Wnt3A - High Strain - 18	Average	SEM
	1 Hour	0	0	0.465116	0	0	0	1.16279	0.930233	1.39535	1.39535	0.697674	0.930233	0.581395	0.165685		0.697674	0.930233	2.7907	1.62791	0.465116	0.930233	0.697674	1.39535	0.930233	1.16279	1.16279	0.697674	0.697674	0.465116	0.465116	0.930233	0.465116	0.232558	0.930233	0.134475
	2 Hours	0.232558	0.465116	0.930233	0.465116	0.930233	0.465116	0.232558	0	0.697674	0	0.465116	0.930233	0.484496	0.0968992		0.232558	0.930233	0.232558	0.465116	0	0.465116	0.232558	0.930233	0.232558	0.697674	1.16279	0.465116	0.465116	0.232558	0.697674	0.465116	0.930233	0.232558	0.503876	0.0737687
	3 Hours	0.232558	0.930233	0.697674	0.697674	0.465116	0.232558	0.232558	0.232558	0	0.465116	0.465116	0	0.387597	0.0826359		0.465116	0.232558	0.697674	0.465116	0.232558	0.465116	0.697674	0.232558	0.465116	0.465116	0.465116	0.697674	0.465116	0	0.232558	0.697674	0.232558	0.465116	0.426357	0.0457494
	4 Hours	0	0.465116	0.930233	0.465116	0	0	0.697674	0.232558	0.697674	0	0.930233	0.697674	0.426357	0.106469		2.09302	1.39535	1.16279	2.7907	1.39535	1.62791	1.39535	1.86047	2.7907	2.09302	1.16279	1.16279	0.697674	0.697674	1.39535	0	0.465116	0.930233	1.39535	0.169705
	5 Hours	0.232558	0.930233	1.62791	0.232558	1.62791	1.16279	0.232558	0.697674	0.232558	0	0	0.465116	0.620155	0.170158		1.86047	2.7907	1.86047	3.25581	0.697674	0.465116	1.86047	2.32558	4.65116	1.86047	1.39535	1.62791	2.09302	1.16279	3.02326	0.465116	1.16279	1.39535	1.8863	0.242006
	6 Hours	1.16279	2.09302	1.16279	0.697674	3.25581	1.86047	0.232558	1.16279	0.697674	1.62791	0.465116	0.465116	1.24031	0.248458		0.930233	1.16279	0.465116	0.465116	0.930233	1.39535	2.32558	3.02326	3.02326	0.930233	0.930233	1.86047	0.930233	0.930233	0.930233	0.697674	0.930233	1.62791	1.30491	0.178494
	7 Hours	1.39535	0.697674	1.62791	1.62791	2.7907	2.7907	0.697674	0.465116	1.39535	0.465116	0.232558	0.232558	1.20155	0.260533		0.232558	0.232558	0.232558	0.465116	0.232558	0	0.697674	2.09302	1.16279	1.16279	1.16279	0.465116	0.465116	0.697674	0.697674	1.39535	0.232558	1.16279	0.710594	0.12475
	8 Hours	0	1.16279	0.232558	1.16279	0.232558	0.232558	0	0.465116	0	0	0.930233	0.465116	0.406977	0.128418		0.697674	0.465116	0.697674	0.930233	0.465116	0.232558	1.39535	1.16279	0.232558	1.16279	0.697674	0.930233	0.697674	0	0.465116	0.465116	0.465116	0.465116	0.645995	0.0829679
	9 Hours	0	0.232558	0	0.232558	0.232558	0	0.697674	0	0.465116	1.39535	1.16279	0.697674	0.426357	0.136787		3.25581	2.32558	0.930233	0.930233	0.697674	0.465116	2.32558	0.930233	1.39535	1.16279	1.16279	0.930233	0.697674	0.232558	0.930233	0.930233	0.930233	0.465116	1.14987	0.174062
	10 Hours	0.465116	0.232558	1.16279	0.232558	0	0.232558	0.465116	0.232558	1.39535	0.697674	0.930233	1.16279	0.600775	0.132604		2.09302	1.62791	0.465116	1.39535	0.697674	1.39535	1.86047	1.16279	1.62791	0.697674	0.465116	1.16279	1.16279	0	0.465116	1.39535	0.232558	1.62791	1.08527	0.13816
	11 Hours	0.232558	0	0.465116	0.232558	0.697674	0.232558	1.16279	1.16279	1.16279	0.930233	1.39535	1.16279	0.736434	0.13975		2.09302	1.62791	1.86047	0.465116	0.465116	0.232558	1.86047	1.62791	1.39535	0.697674	0.465116	1.16279	0	0.465116	0.465116	0.697674	0.232558	0	0.878553	0.159066
	12 Hours	0	0.465116	0.232558	0	0.465116	0.697674	0.465116	0.930233	0.930233	1.62791	1.39535	1.62791	0.736434	0.166507		1.39535	1.62791	2.32558	1.39535	1.16279	0.465116	1.86047	1.16279	1.86047	1.39535	2.32558	1.16279	0.465116	0.232558	0.697674	0.465116	0.930233	0	1.16279	0.15742
	13 Hours	0.232558	0	0	0	1.39535	0.232558	0.232558	1.39535	0.232558	2.55814	1.16279	1.39535	0.736434	0.237497		3.02326	3.25581	1.86047	1.62791	0.465116	0.697674	2.09302	1.86047	2.09302	1.39535	2.7907	1.86047	1.16279	0.232558	0.465116	0.465116	0.465116	0.232558	1.44703	0.225284
	14 Hours	0	0.465116	0	0	0	0	0.697674	0.697674	0.465116	1.16279	1.16279	1.39535	0.503876	0.151023		1.86047	1.62791	0.697674	1.86047	0.697674	0.930233	3.02326	1.39535	2.55814	2.7907	1.86047	1.86047	1.39535	0.465116	0.232558	0.930233	0	0.232558	1.35659	0.206431
	15 Hours	0	0	0.232558	0.465116	0	0	1.16279	0.232558	0.232558	1.39535	1.16279	1.16279	0.503876	0.158953		0.465116	1.39535	1.86047	1.16279	0.930233	0.465116	2.7907	2.32558	3.25581	3.25581	3.72093	2.09302	0.465116	0	0	0.232558	0.930233	0.232558	1.42119	0.28106
	16 Hours	0	0	0	0	0	0	0.465116	0.232558	0	0.697674	0.465116	0.930233	0.232558	0.0949415		0.465116	0.232558	0	0.465116	0.232558	0	3.02326	1.86047	3.95349	5.81395	4.18605	2.32558	0.930233	0.465116	0.697674	0.232558	0.697674	0.465116	1.44703	0.394
	17 Hours	0	0.232558	0	0	0	0	0.465116	0.697674	0.697674	0.697674	0.697674	1.39535	0.406977	0.128418		0.232558	0.697674	0.232558	0.232558	0.465116	0	3.02326	5.34884	4.65116	6.04651	3.72093	2.55814	0.697674	0.232558	0	0	0.232558	0.465116	1.60207	0.471512
	18 Hours	0	0	0	0.232558	0	0	0.697674	0.697674	1.62791	0	1.62791	0.697674	0.465116	0.178769		0.232558	0.930233	0.232558	0.232558	0.465116	0.232558	2.7907	4.88372	4.4186	4.18605	5.11628	4.18605	2.09302	0.232558	0.232558	0.232558	0.465116	0.697674	1.77003	0.440009
	19 Hours	0.232558	0	0.232558	0	0.232558	0.232558	1.16279	0.232558	0.697674	1.16279	0.697674	0	0.406977	0.12187		0.930233	0.697674	0	0.697674	0.232558	0.465116	4.18605	3.95349	5.81395	6.51163	4.18605	6.04651	1.62791	1.16279	0.232558	0.232558	0.232558	0.232558	2.0801	0.533359
	20 Hours	0.465116	0	0.232558	0	0.232558	0	0	1.39535	0.465116	0.930233	0.465116	0.930233	0.426357	0.130659		0.697674	0.465116	0.232558	0.465116	0.465116	0.465116	5.81395	4.18605	4.18605	7.44186	4.88372	3.95349	1.39535	0.930233	0.697674	1.39535	1.16279	0.465116	2.18346	0.516345
	21 Hours	0.232558	0.232558	0	0.465116	0.232558	0.232558	0.697674	0.465116	0.232558	0.465116	0.465116	0.465116	0.348837	0.0535542		1.39535	0.465116	0.697674	1.16279	0.465116	0.465116	5.5814	3.72093	7.90698	7.90698	6.51163	4.88372	3.02326	0.930233	0.697674	0.930233	1.39535	0.697674	2.71318	0.61461
	22 Hours	0	0	0.232558	0.465116	0	0.232558	0.465116	0	0.465116	0.697674	0.465116	0.232558	0.271318	0.0691382		1.86047	1.86047	1.16279	1.39535	1.39535	1.62791	4.65116	6.74419	5.5814	6.27907	5.81395	5.5814	3.48837	0	0.697674	0.930233	0.930233	1.16279	2.84238	0.52132
	23 Hours	0.232558	0	0.232558	0	0	0.232558	0.465116	0.232558	0.232558	0.232558	0.930233	0.465116	0.271318	0.07483		1.39535	1.39535	1.16279	1.16279	1.16279	1.39535	5.34884	8.37209	6.04651	6.74419	6.27907	3.48837	2.7907	0.930233	0.930233	1.16279	1.16279	1.39535	2.90698	0.568251
	24 Hours	0.232558	0.232558	0.465116	0	0.232558	0	0.465116	0	0	0	0.232558	0	0.155039	0.0522636		2.09302	1.39535	1.39535	1.86047	0.930233	1.86047	4.88372	8.13953	6.27907	5.5814	5.5814	4.65116	4.18605	1.16279	0.930233	0.697674	1.16279	1.39535	3.01034	0.527678

## Sheet: Figure 8D
Single Cell Tracking of Geminin Positive Cells
Figure 8D
Collected from 2-3 Independent Experiments per condition (multiple movie fields per experiment)
	Condition	Number of Geminin-Positive Objects Detected	G1 to S to M Objects			<= # of Objects was normalized to number of geminin-positive objects in first frame of movie
	Control - No Strain - 1	260	0.09
	Control - No Strain - 2	285	0.11
	Control - No Strain - 3	298	0.05
	Control - No Strain - 4	247	0.07
	Control - No Strain - 5	241	0.1
	Control - No Strain - 6	277	0.11
	Control - No Strain - 7	286	0.11
	Control - No Strain - 8	374	0.05
	Control - No Strain - 9	316	0.024
	Control - No Strain - 10	289	0.144
	Control - No Strain - 11	303	0.08
	Control - No Strain - 12	288	0.11
	Average		0.0873333
	SEM		0.00904055
	Control - High Strain - 1	301	0.275
	Control - High Strain - 2	378	0.07
	Control - High Strain - 3	460	0.08
	Control - High Strain - 4	431	0.08
	Control - High Strain - 5	512	0.09
	Control - High Strain - 6	456	0.08
	Control - High Strain - 7	396	0.06
	Control - High Strain - 8	414	0.04
	Control - High Strain - 9	454	0.04
	Control - High Strain - 10	497	0.09
	Control - High Strain - 11	520	0.09
	Control - High Strain - 12	480	0.1
	Average		0.09125
	SEM		0.0248956
	Condition	Number of Geminin-Positive Objects Detected	G1 to S toM Objects
	Wnt3A - No Strain - 1	722	0.11
	Wnt3A - No Strain - 2	672	0.16
	Wnt3A - No Strain - 3	682	0.13
	Wnt3A - No Strain - 4	726	0.11
	Wnt3A - No Strain - 5	676	0.04
	Wnt3A - No Strain - 6	572	0.07
	Wnt3A - No Strain - 7	217	0.1
	Wnt3A - No Strain - 8	206	0.13
	Wnt3A - No Strain - 9	218	0.12
	Wnt3A - No Strain - 10	162	0.1
	Wnt3A - No Strain - 11	259	0.07
	Wnt3A - No Strain - 12	250	0.08
	Average		0.101667
	SEM		0.00874111
	Wnt3A - High Strain - 1	567	0.07
	Wnt3A - High Strain - 2	585	0.07
	Wnt3A - High Strain - 3	678	0.06
	Wnt3A - High Strain - 4	616	0.07
	Wnt3A - High Strain - 5	667	0.13
	Wnt3A - High Strain - 6	748	0.26
	Wnt3A - High Strain - 7	1079	0.56
	Wnt3A - High Strain - 8	1254	0.39
	Wnt3A - High Strain - 9	1351	0.51
	Wnt3A - High Strain - 10	1254	0.47
	Wnt3A - High Strain - 11	1048	0.77
	Wnt3A - High Strain - 12	925	0.56
	Wnt3A - High Strain - 13	772	0.51
	Wnt3A - High Strain - 14	447	0.4
	Wnt3A - High Strain - 15	454	0.24
	Wnt3A - High Strain - 16	506	0.43
	Wnt3A - High Strain - 17	472	0.51
	Wnt3A - High Strain - 18	468	0.5
	Average		0.361667
	SEM		0.0533527
