# Supplementary figures and images for: Increasing β-catenin/Wnt3A activity levels drive mechanical strain-induced cell cycle progression through mitosis
Source: eLife journal article supplement (doi:10.7554/elife.19799), 2016-10-26

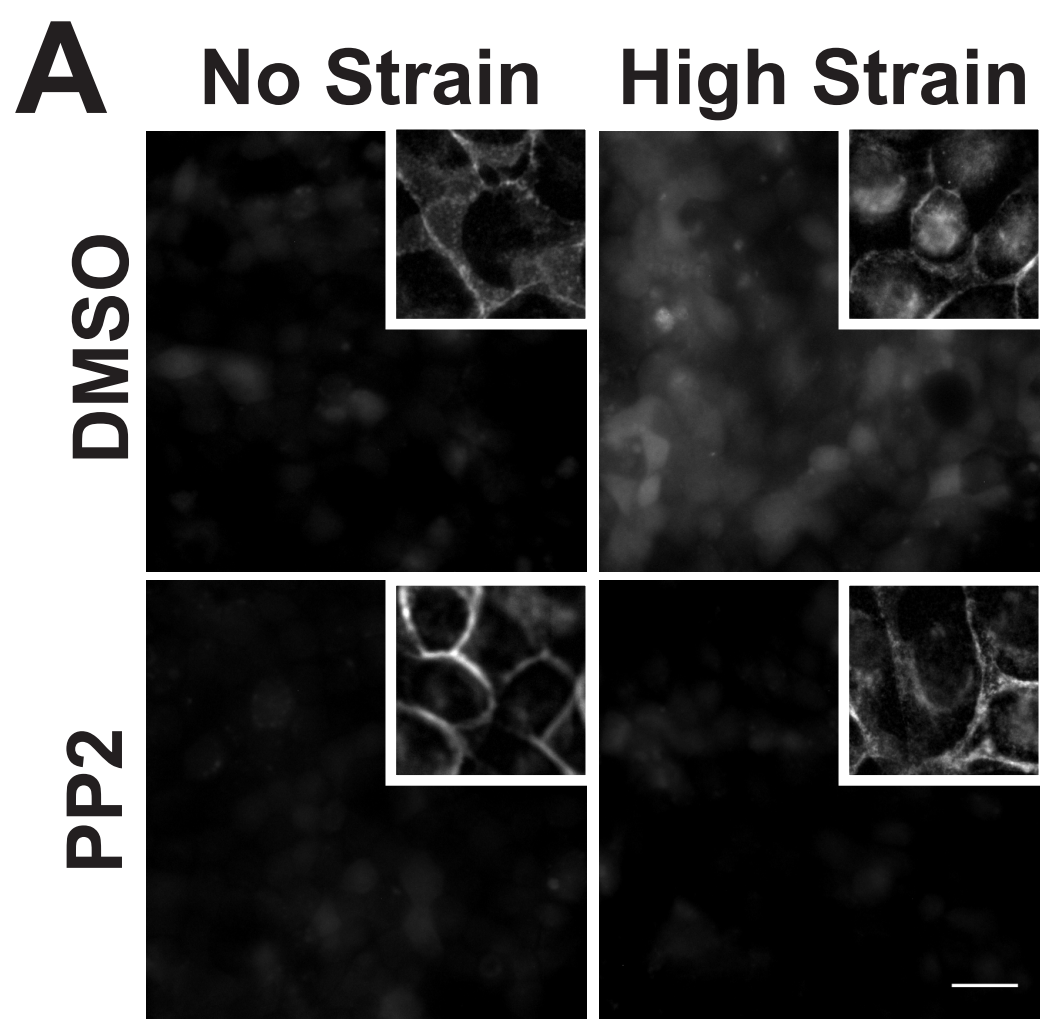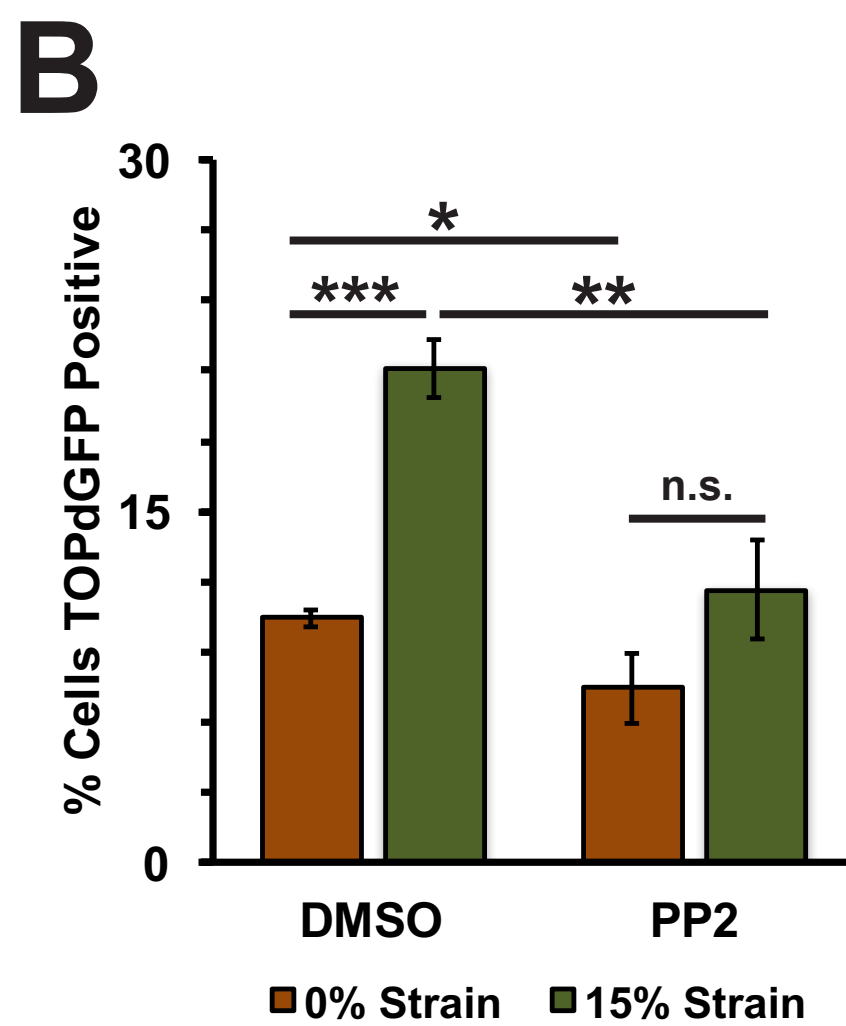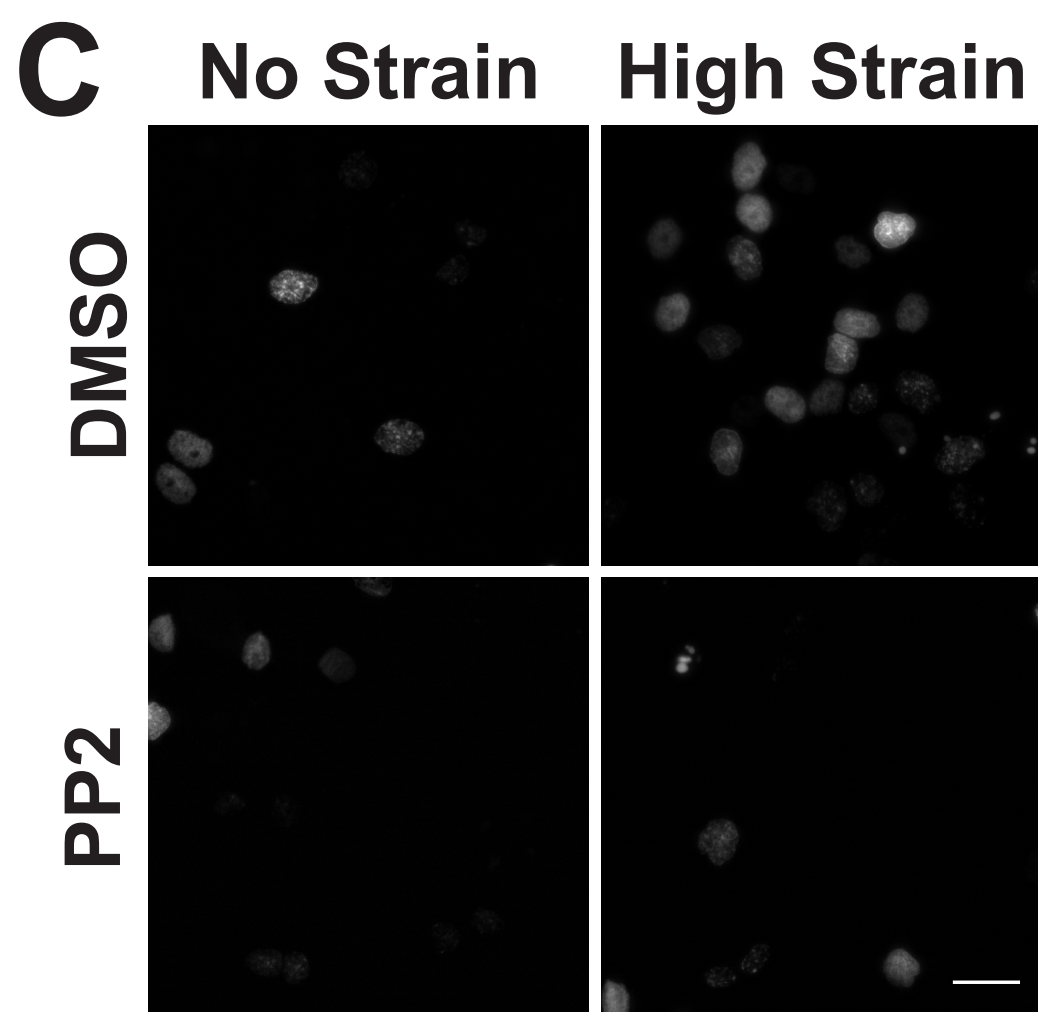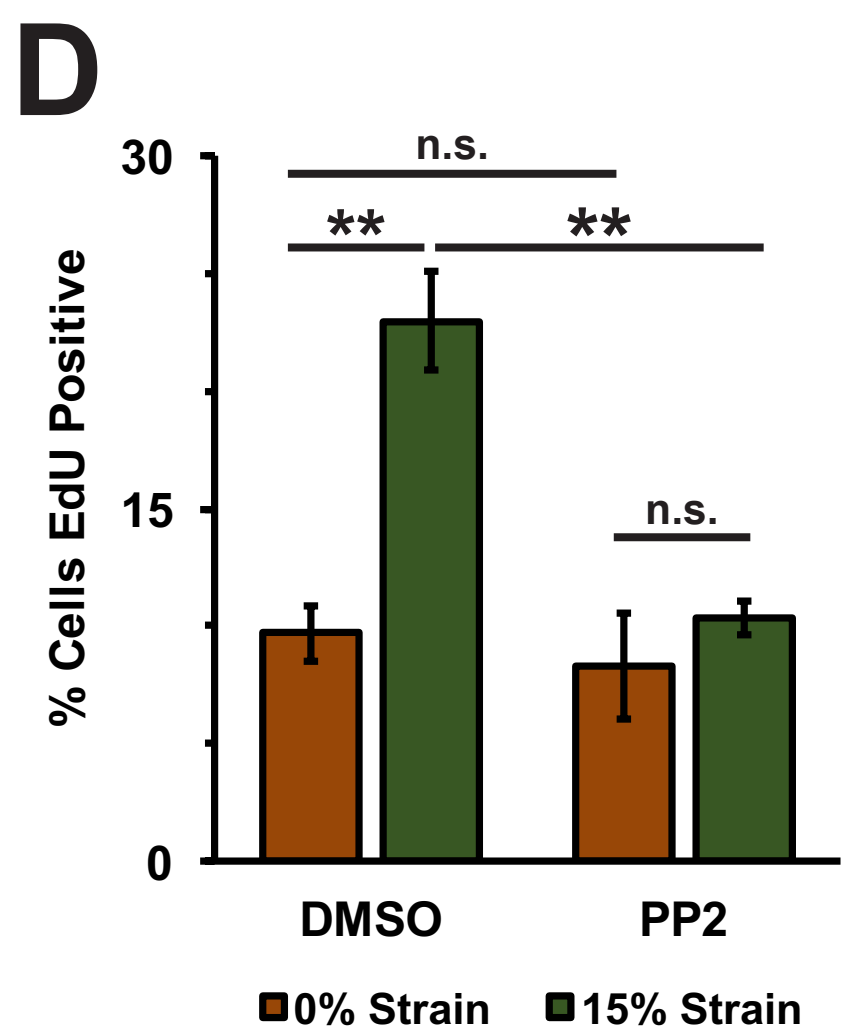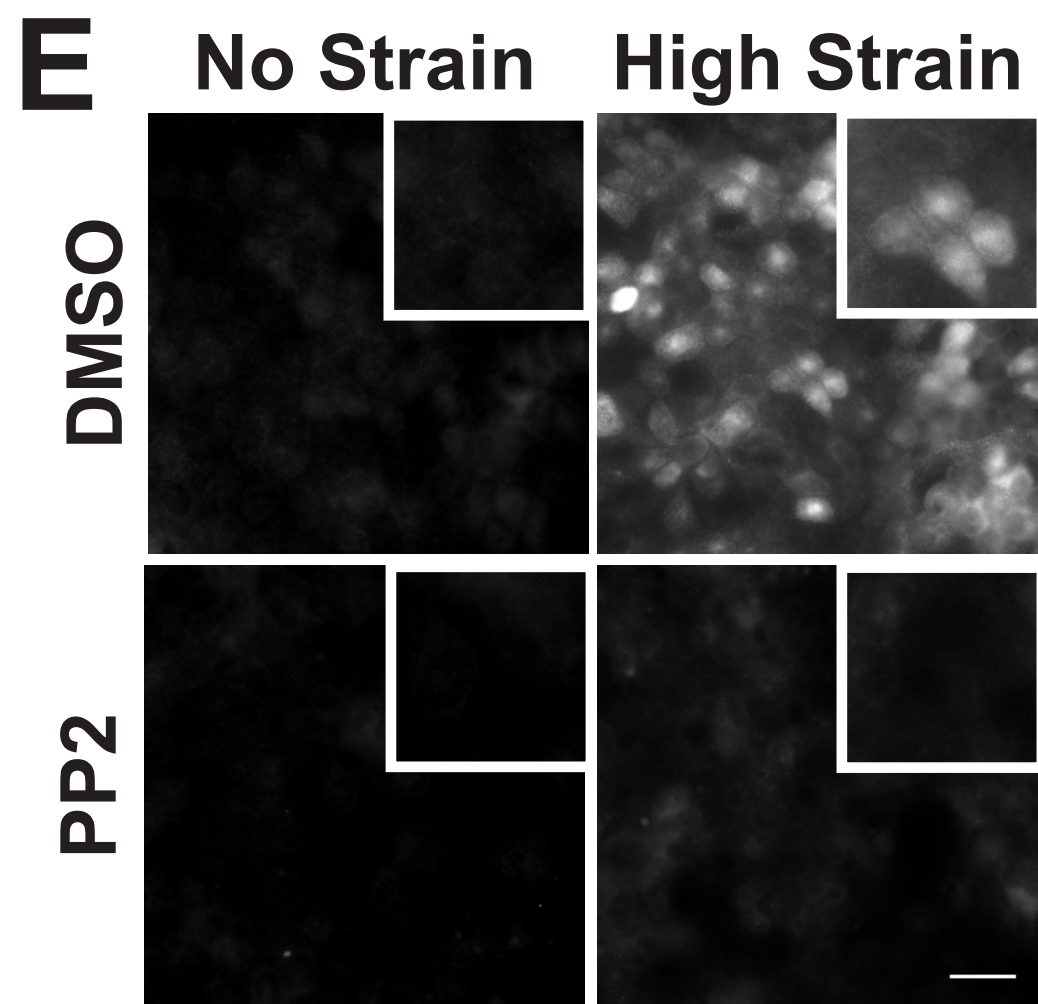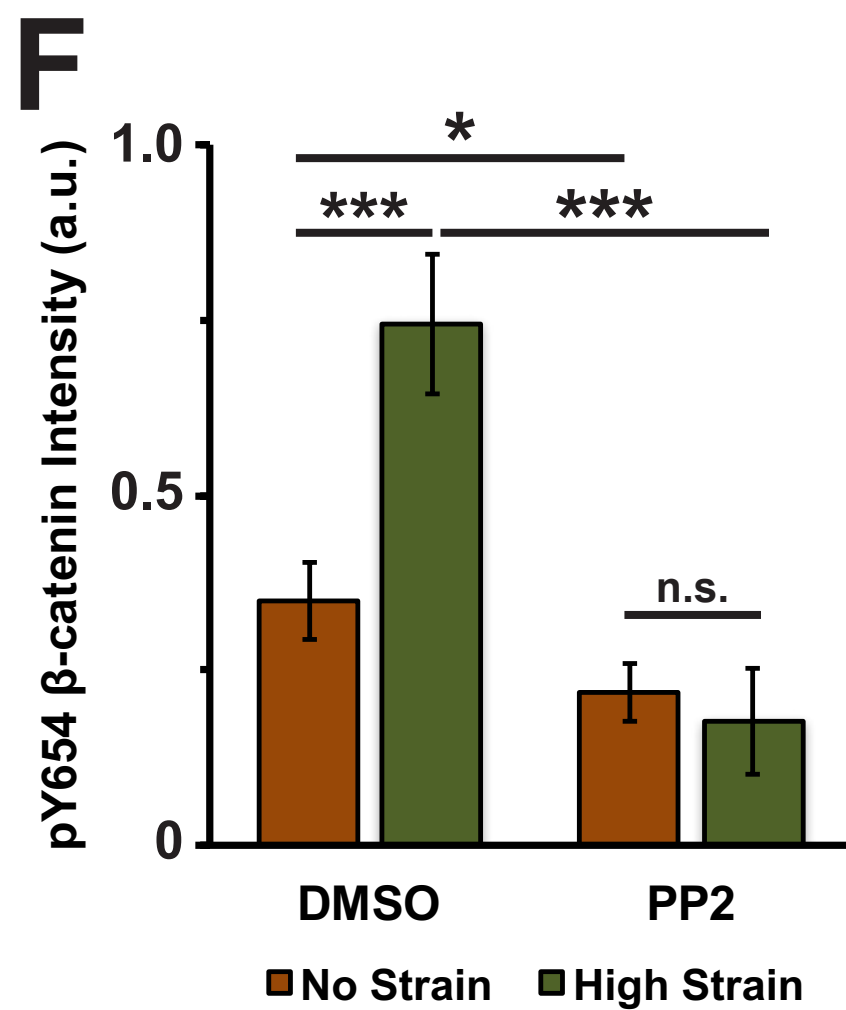

**Figure 3, Supplemental 2**

Supplement: supp [file elife-19799-supp-v1.zip]

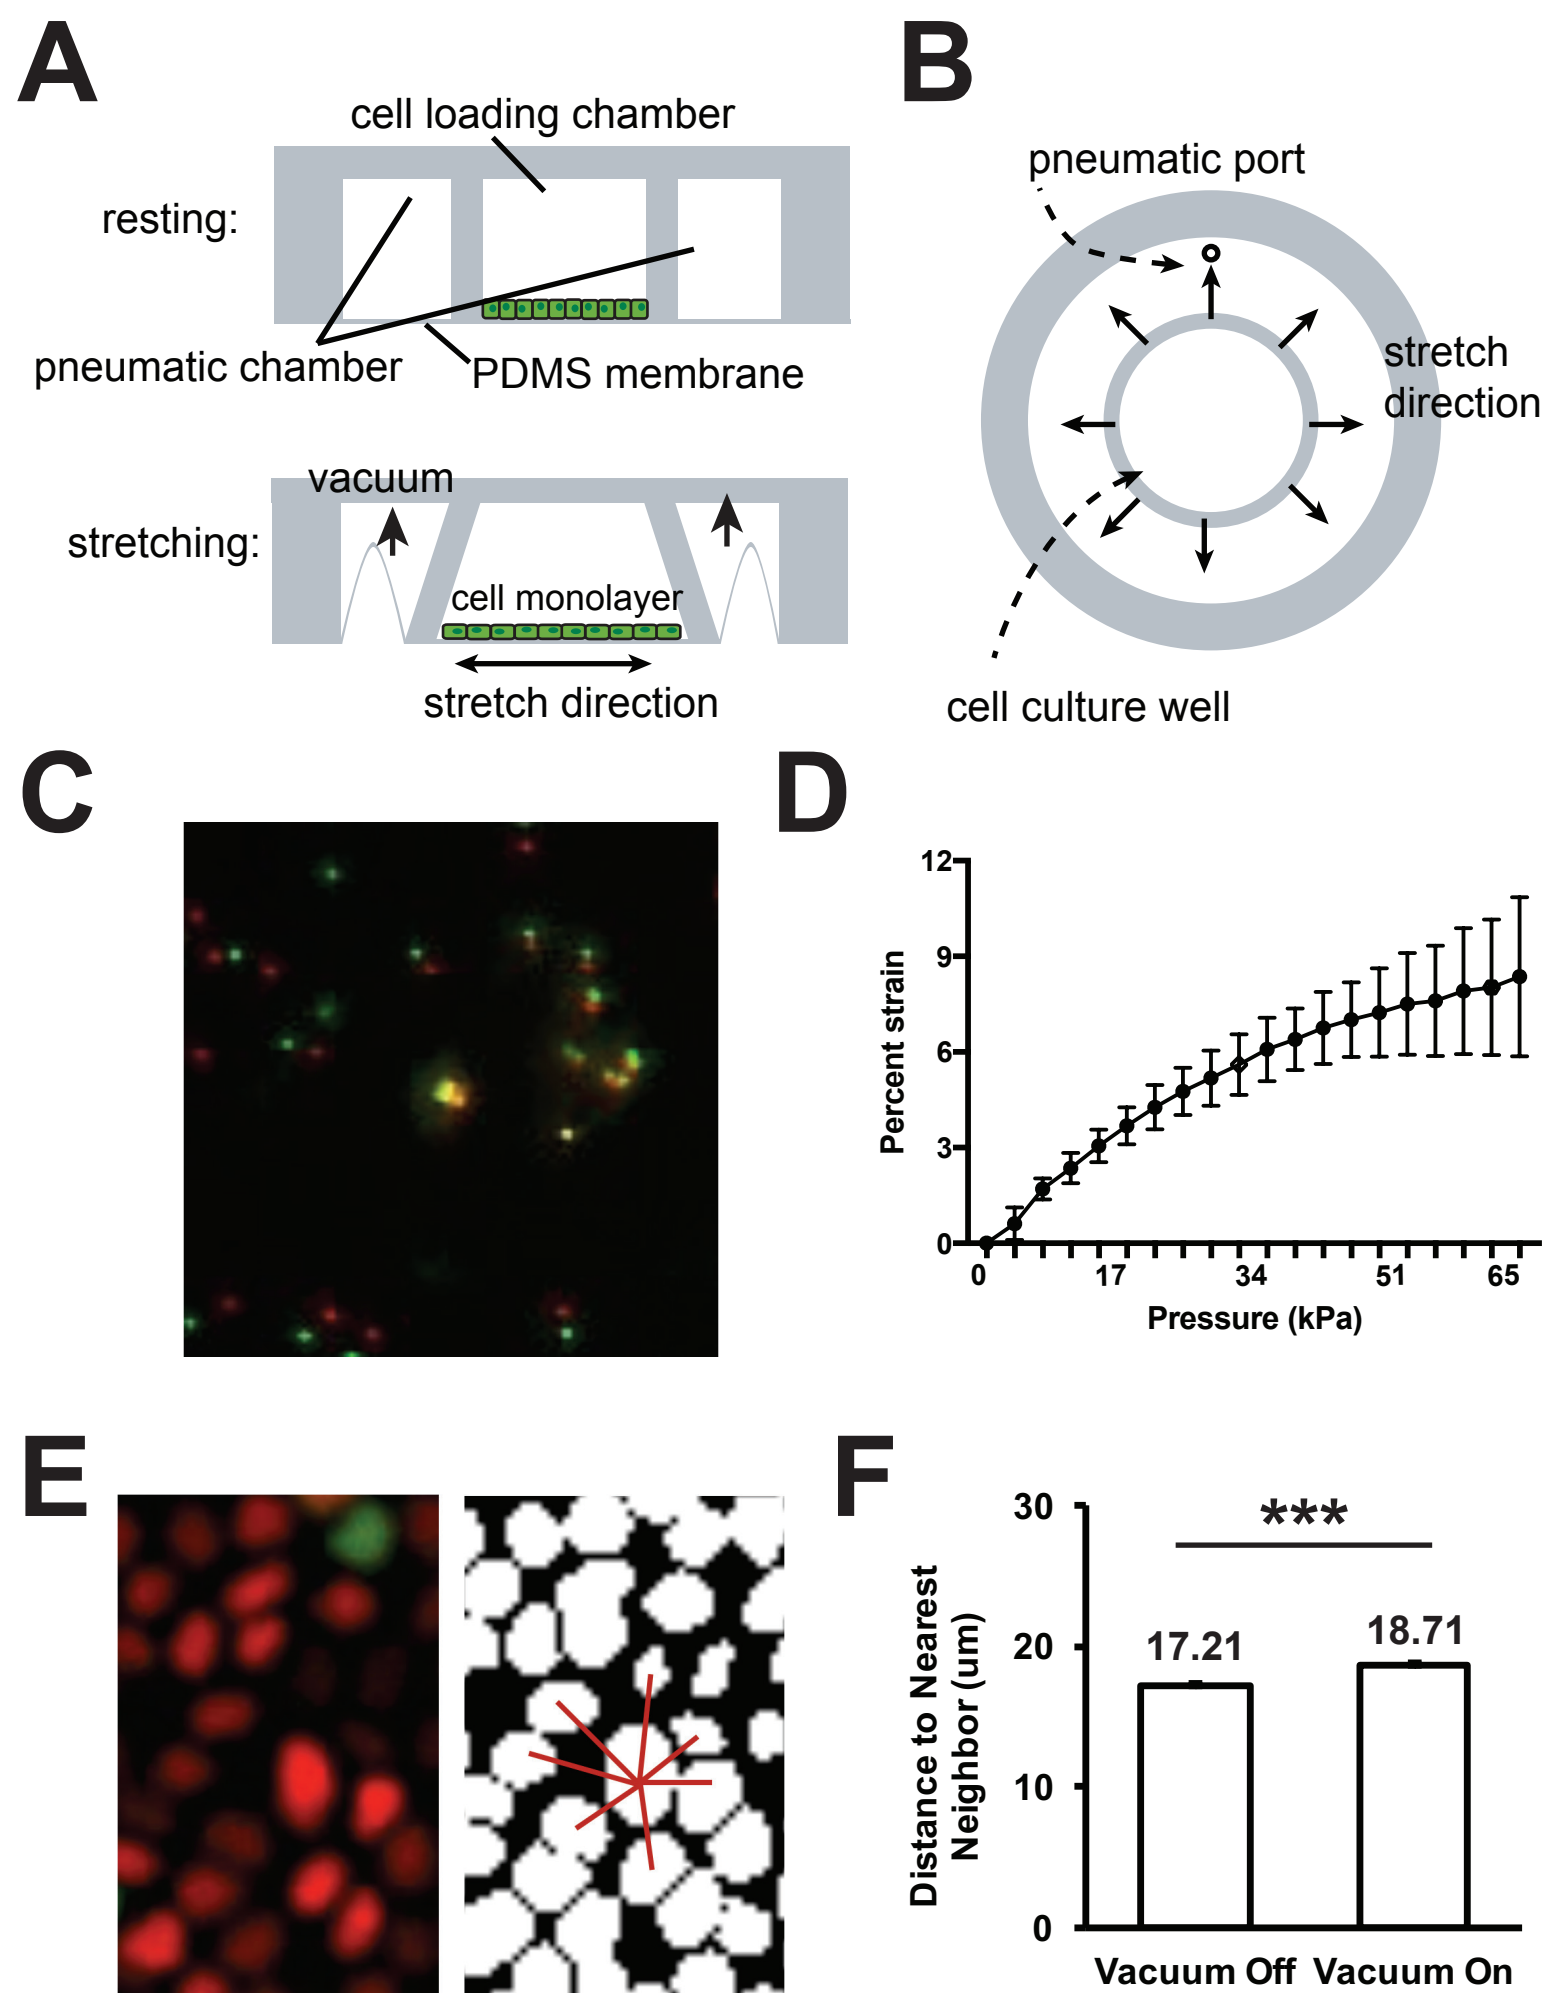

**Figure 1, Supplemental 1**

Supplement: supp [file elife-19799-supp-v1.zip]

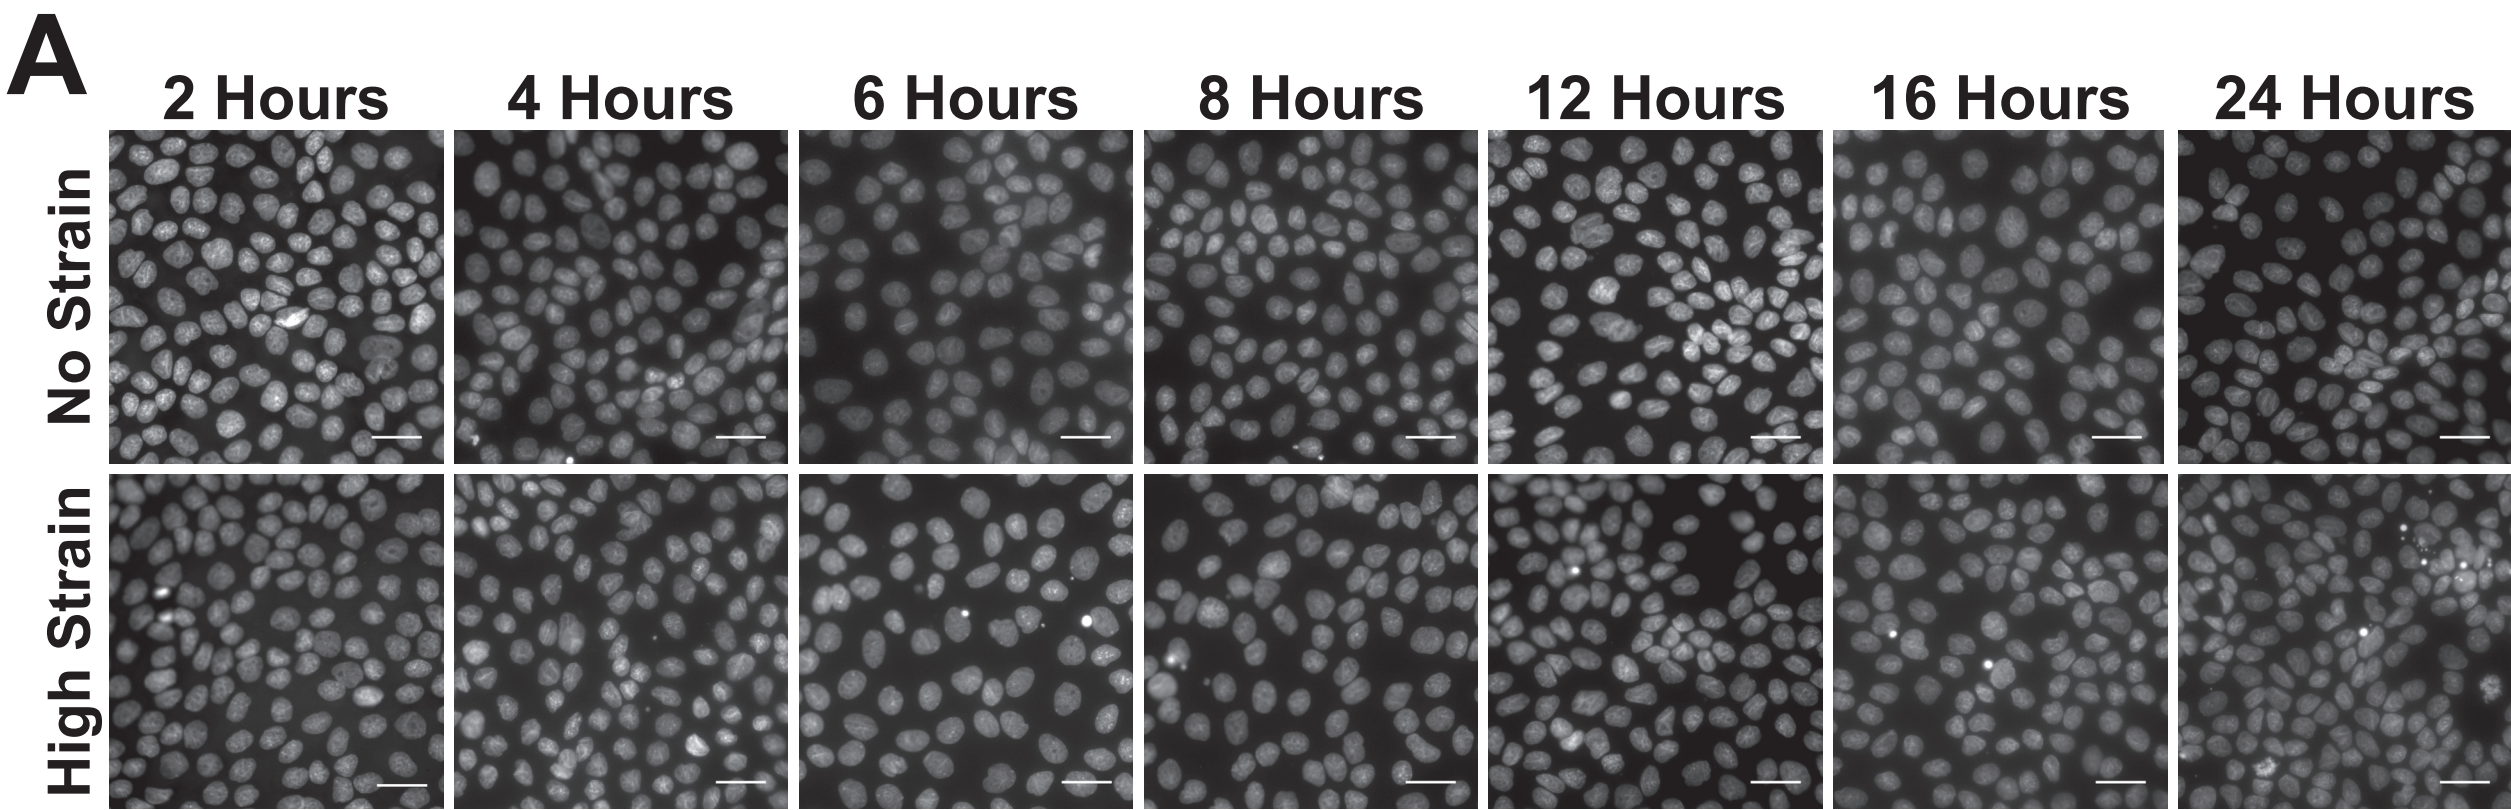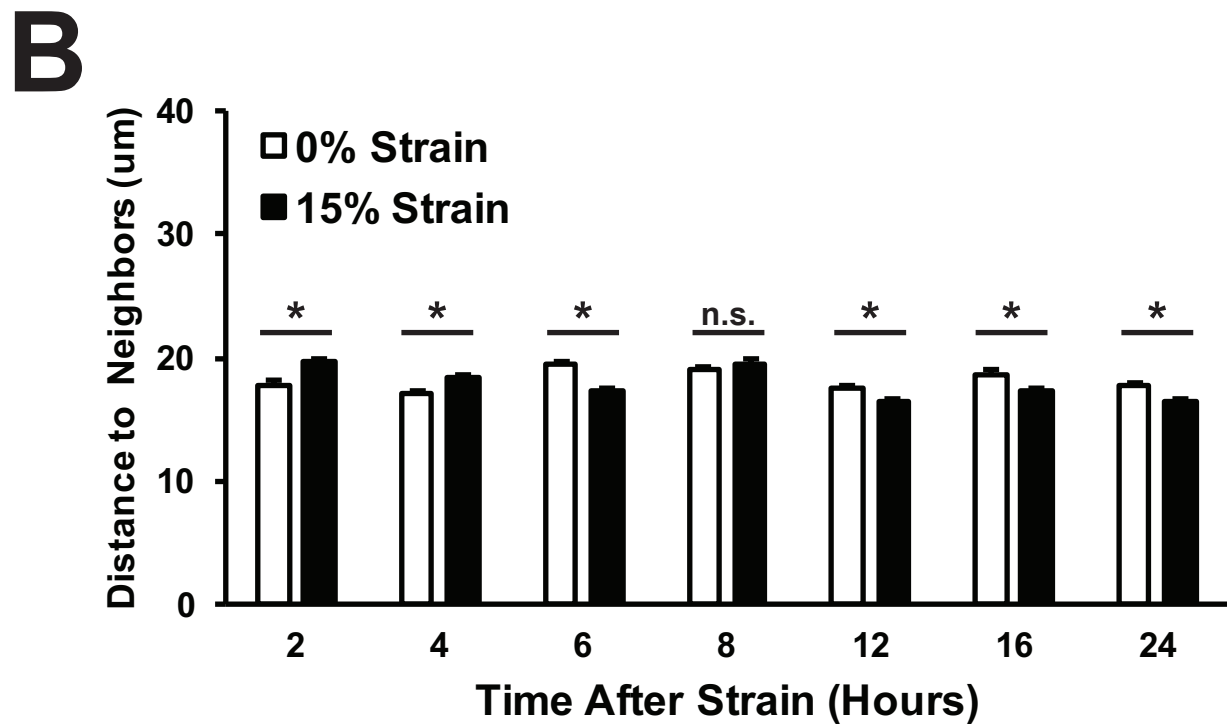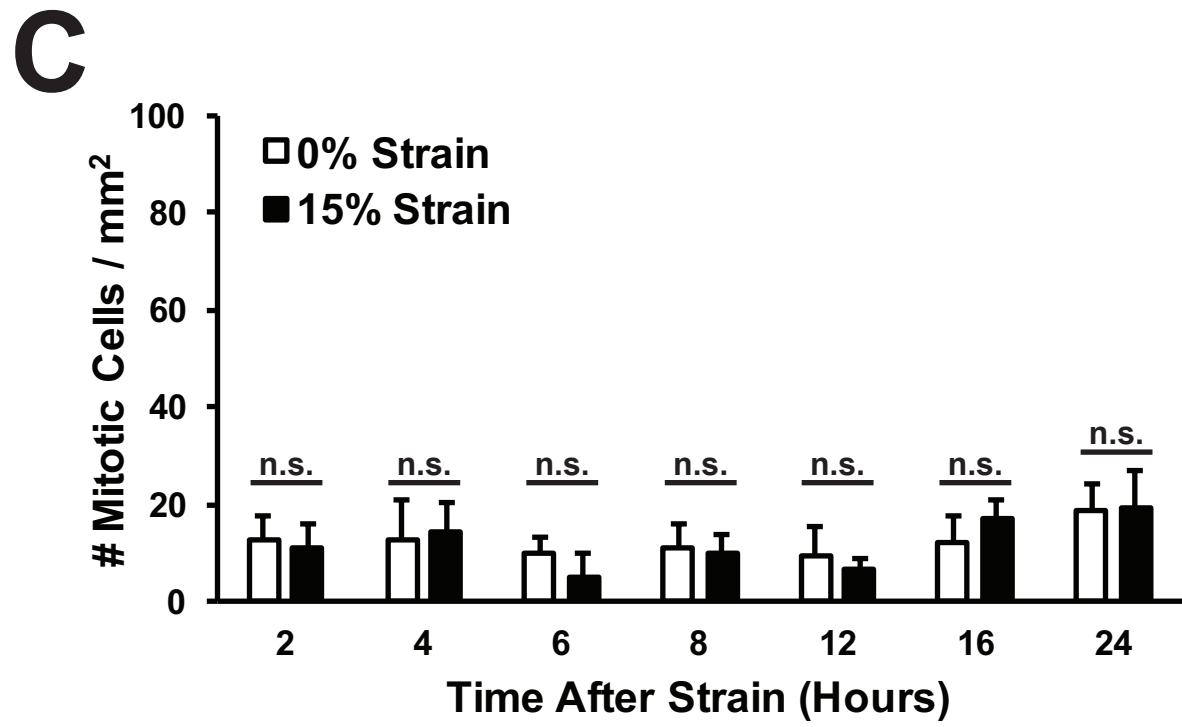

**Figure 1, Supplemental 2**

Supplement: supp [file elife-19799-supp-v1.zip]

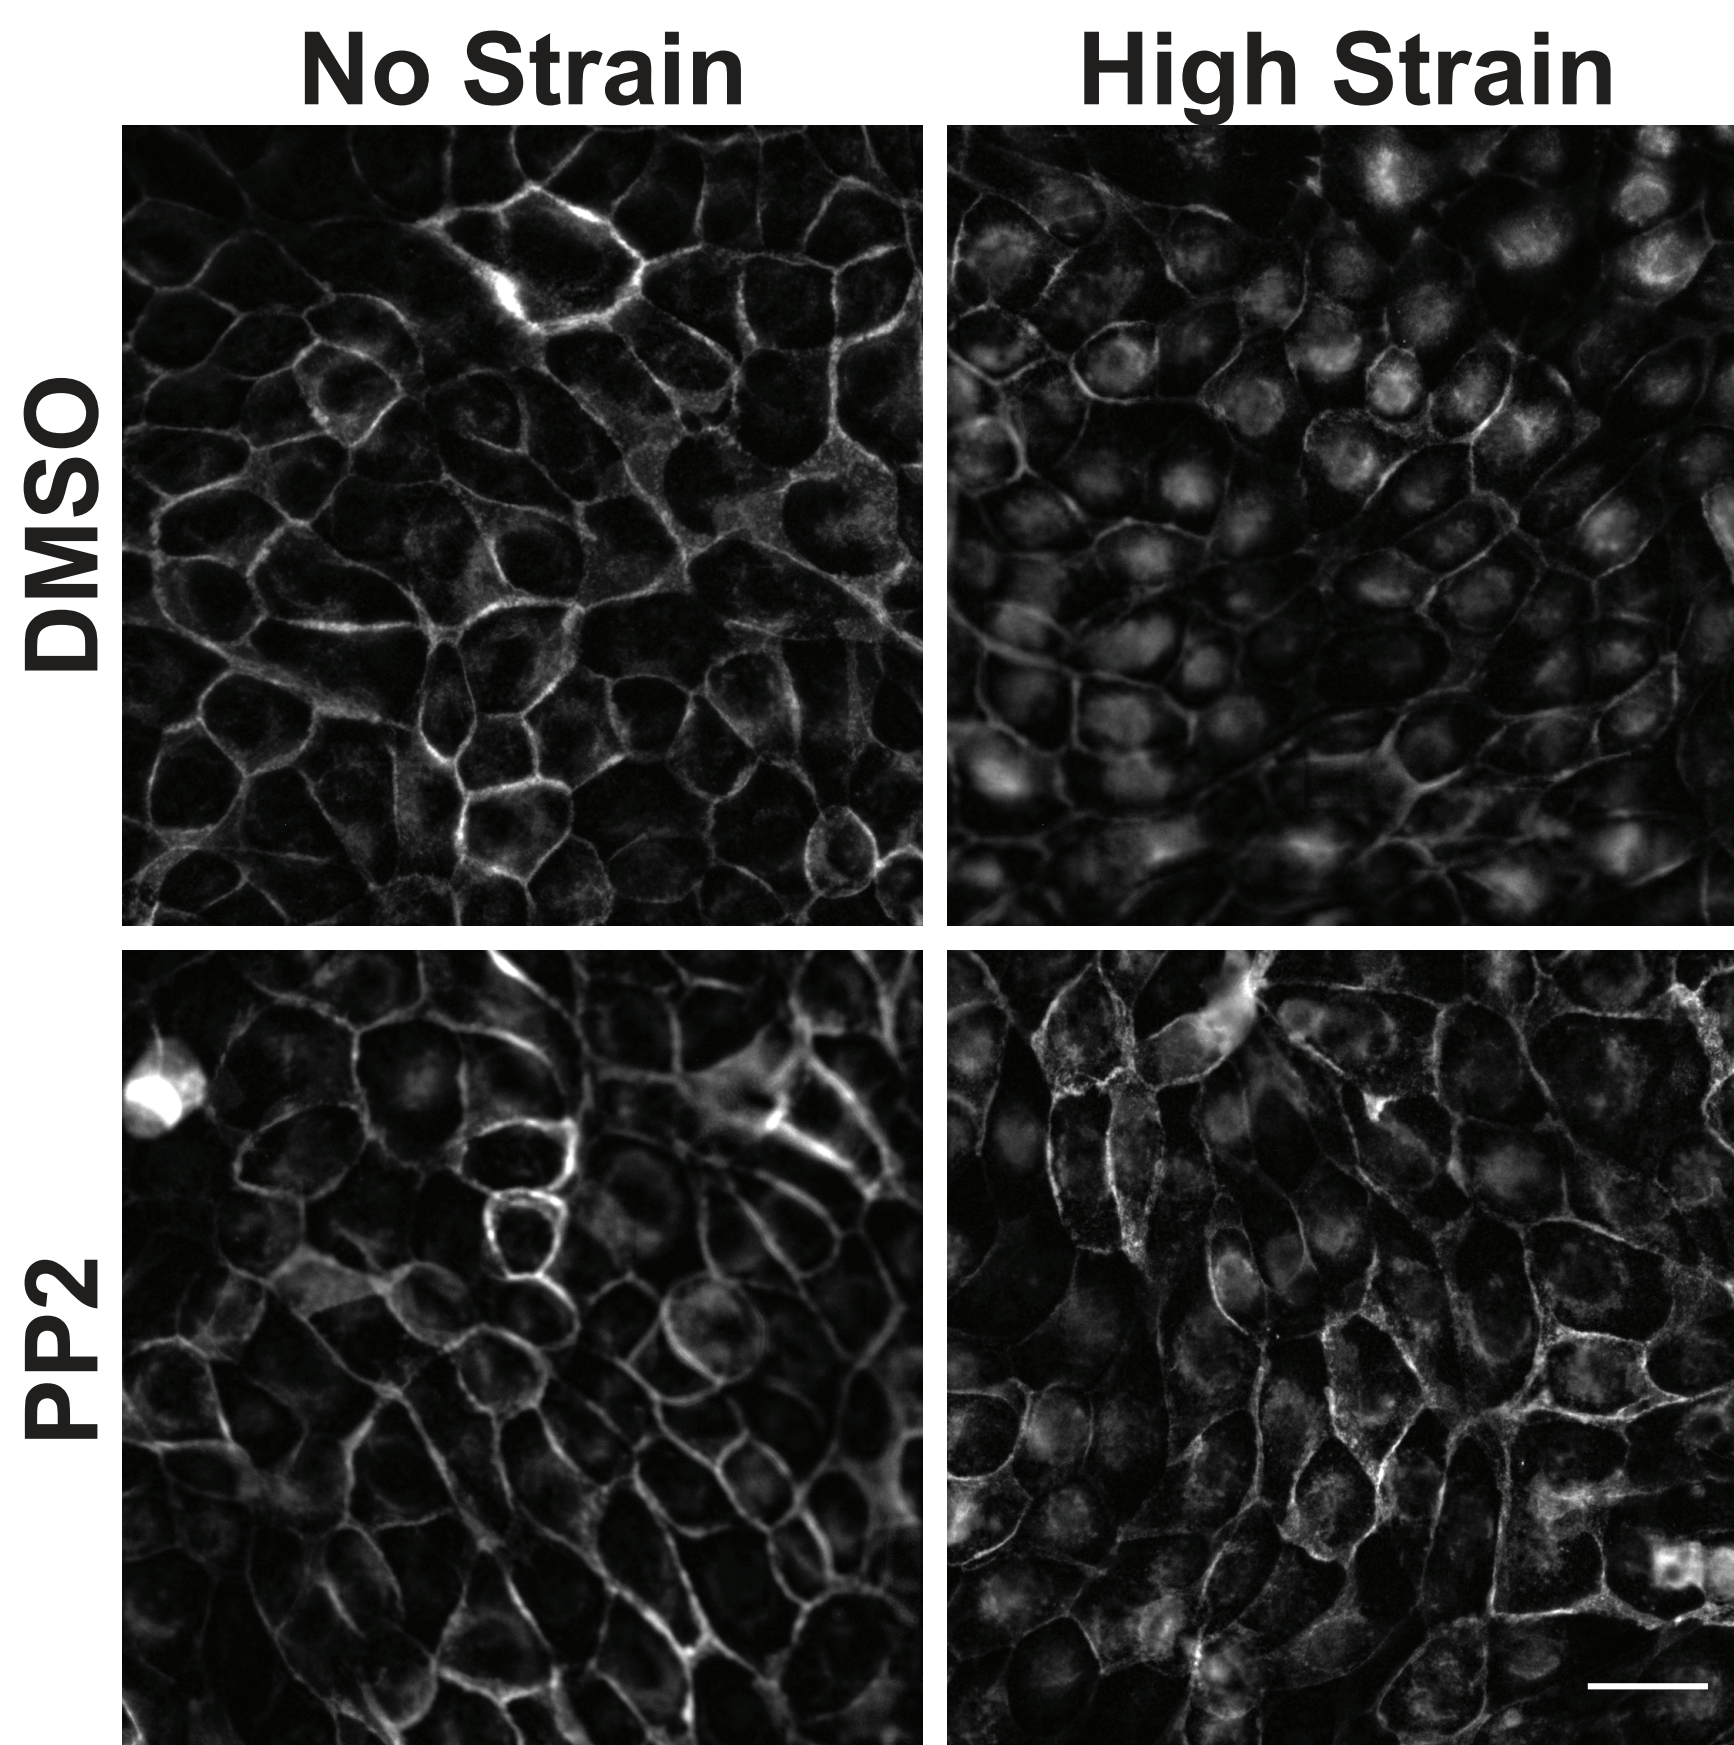

**Figure 3, Supplemental 3**

Supplement: supp [file elife-19799-supp-v1.zip]

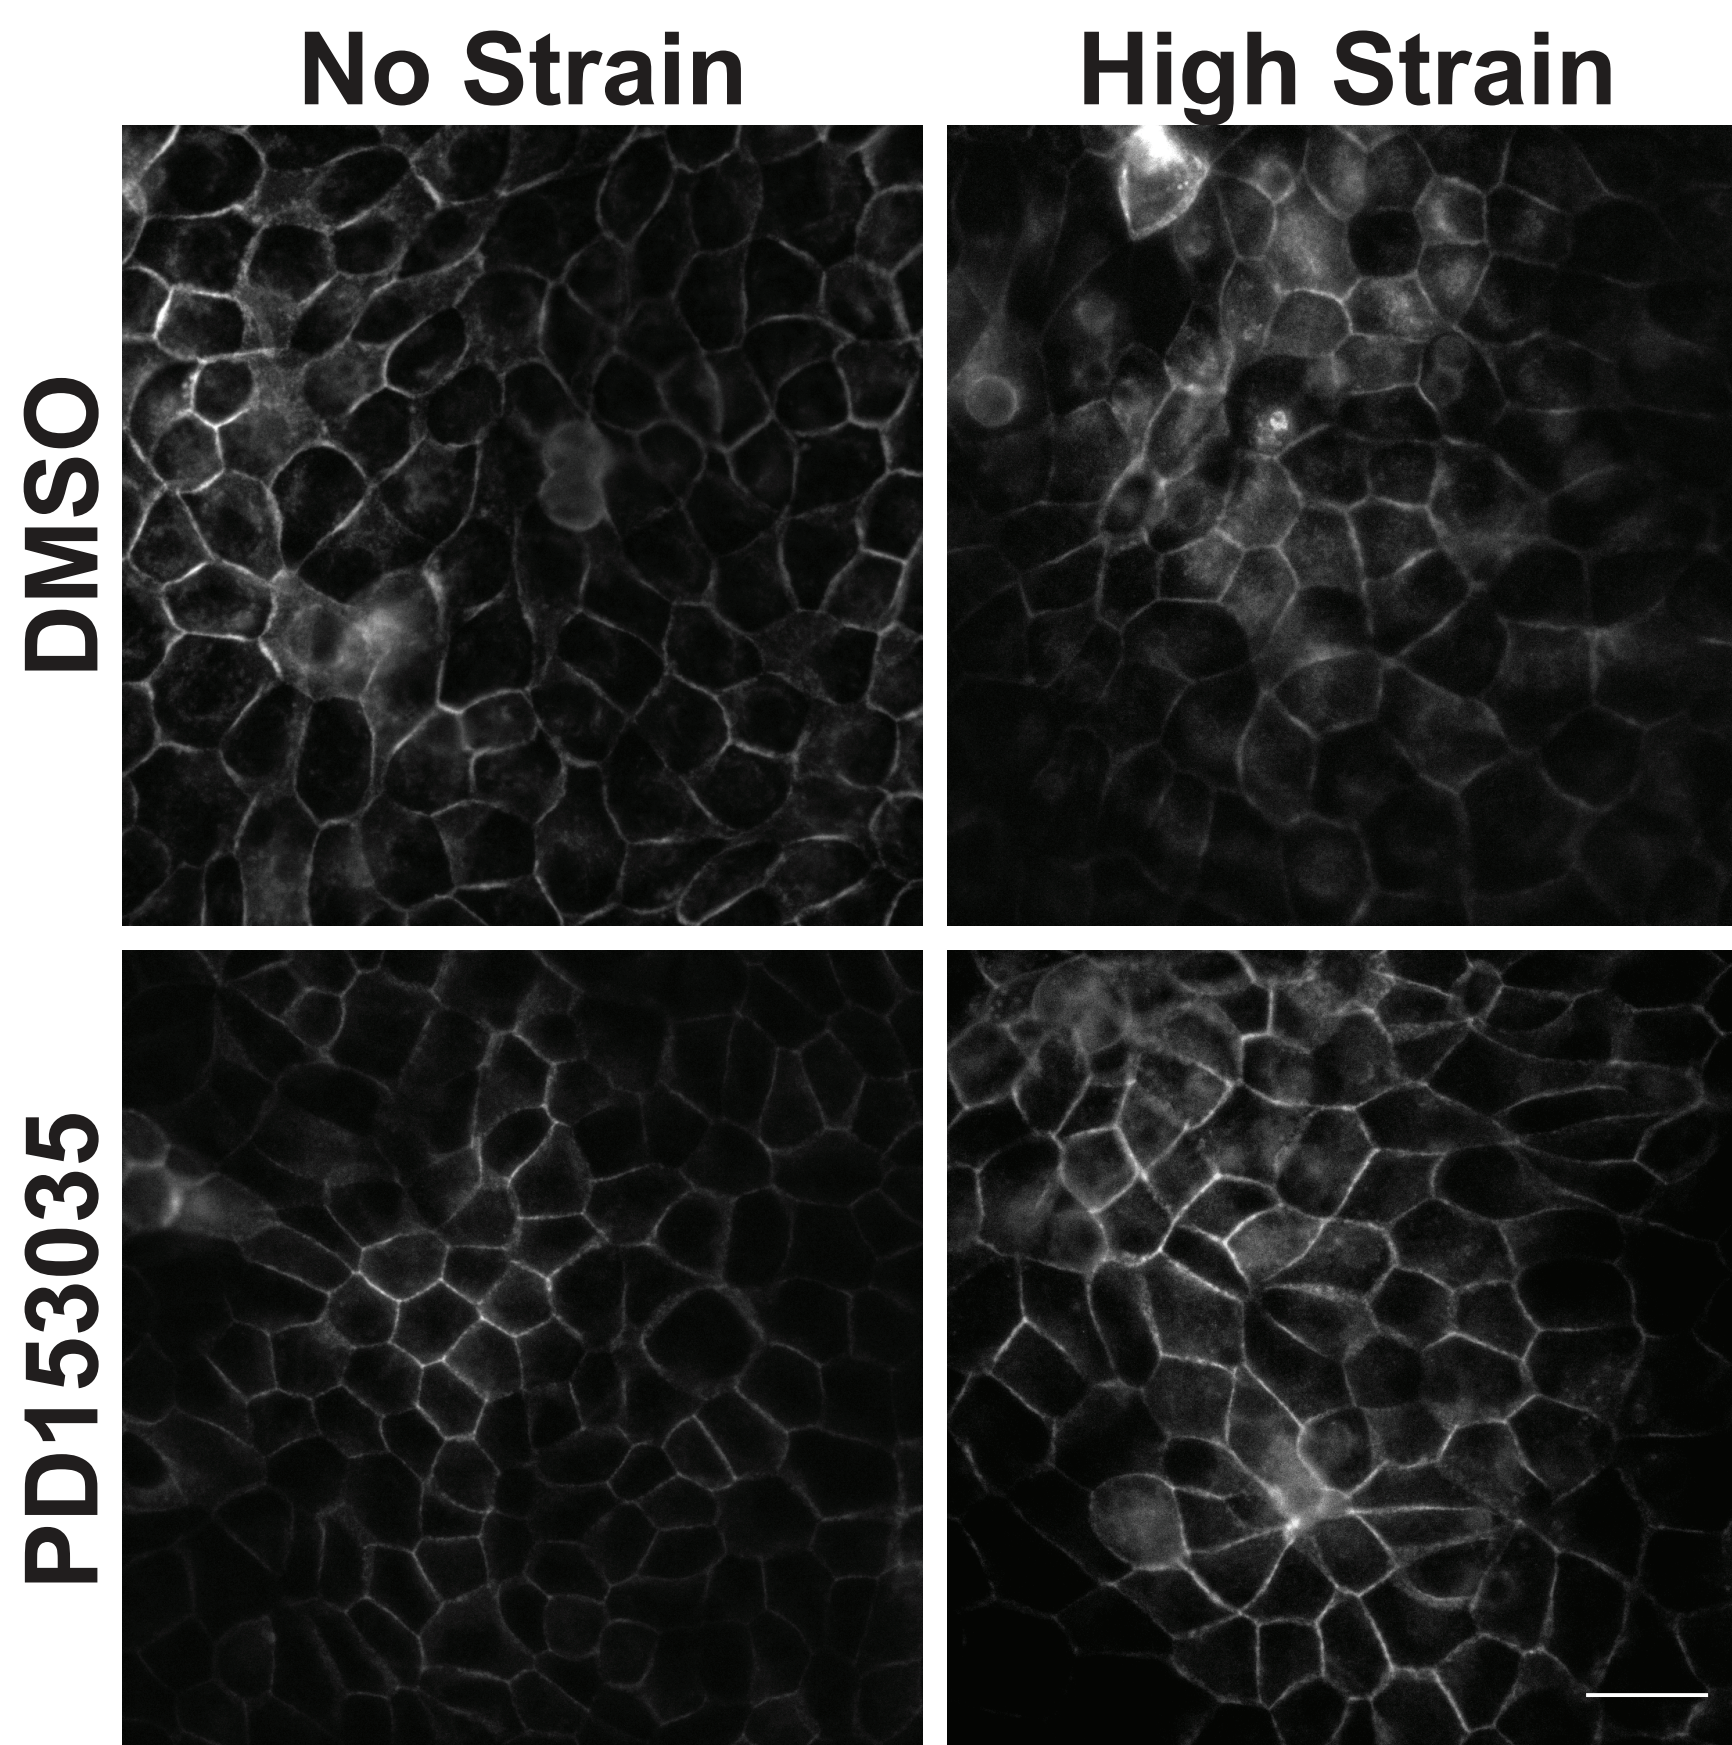

**Figure 3, Supplemental 5**

Supplement: supp [file elife-19799-supp-v1.zip]

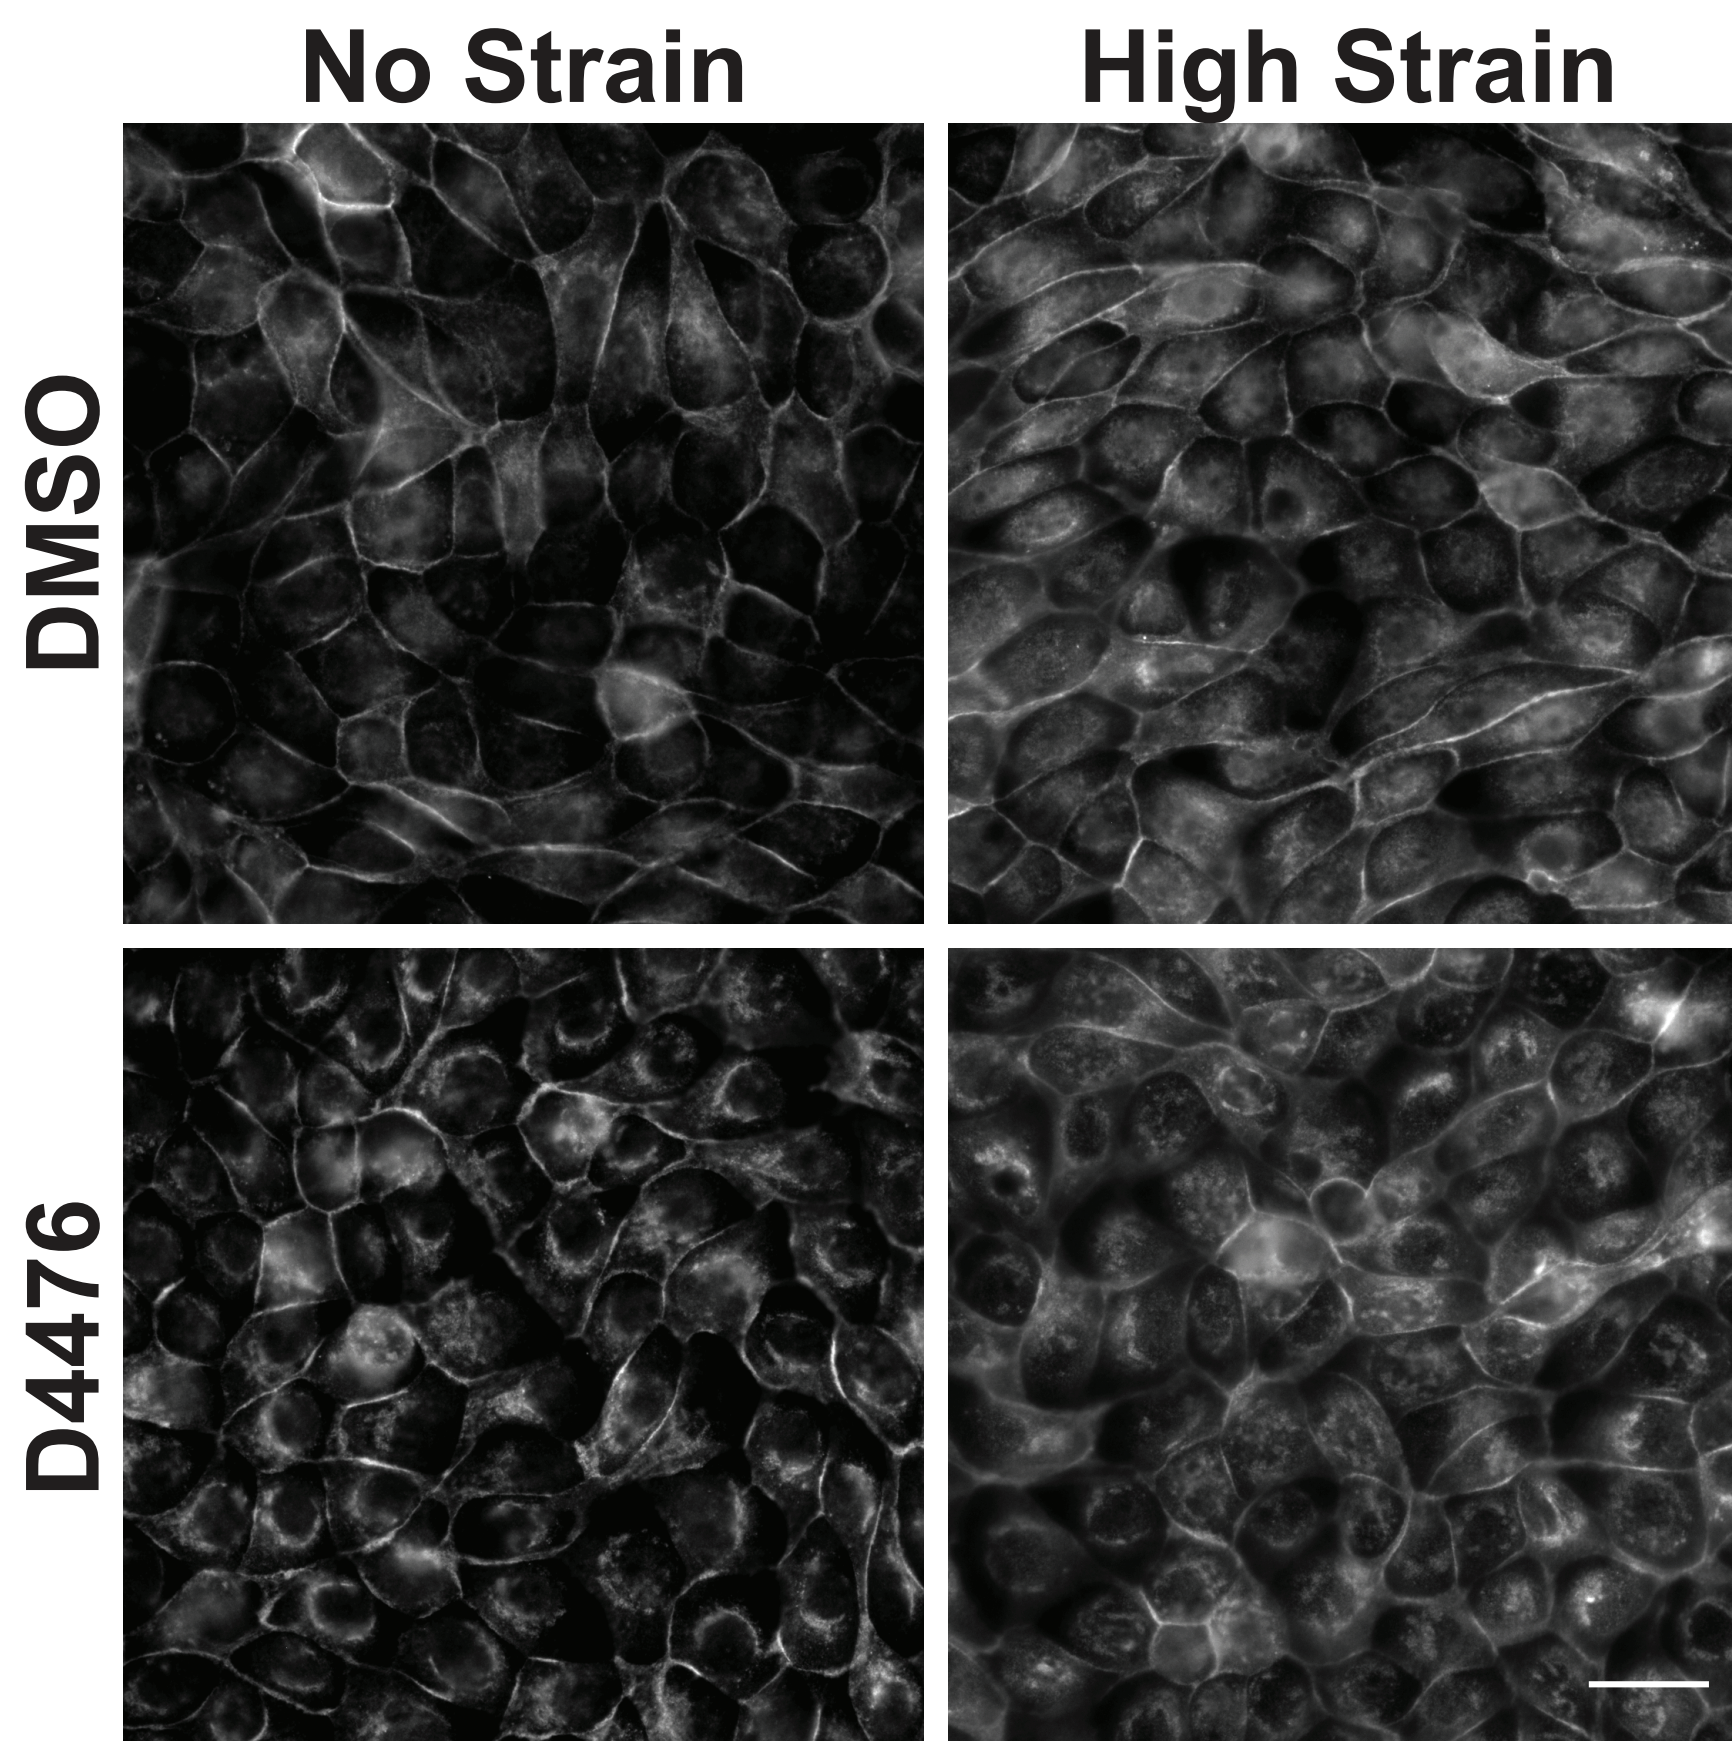

**Figure 4, Supplemental 1**

Supplement: supp [file elife-19799-supp-v1.zip]

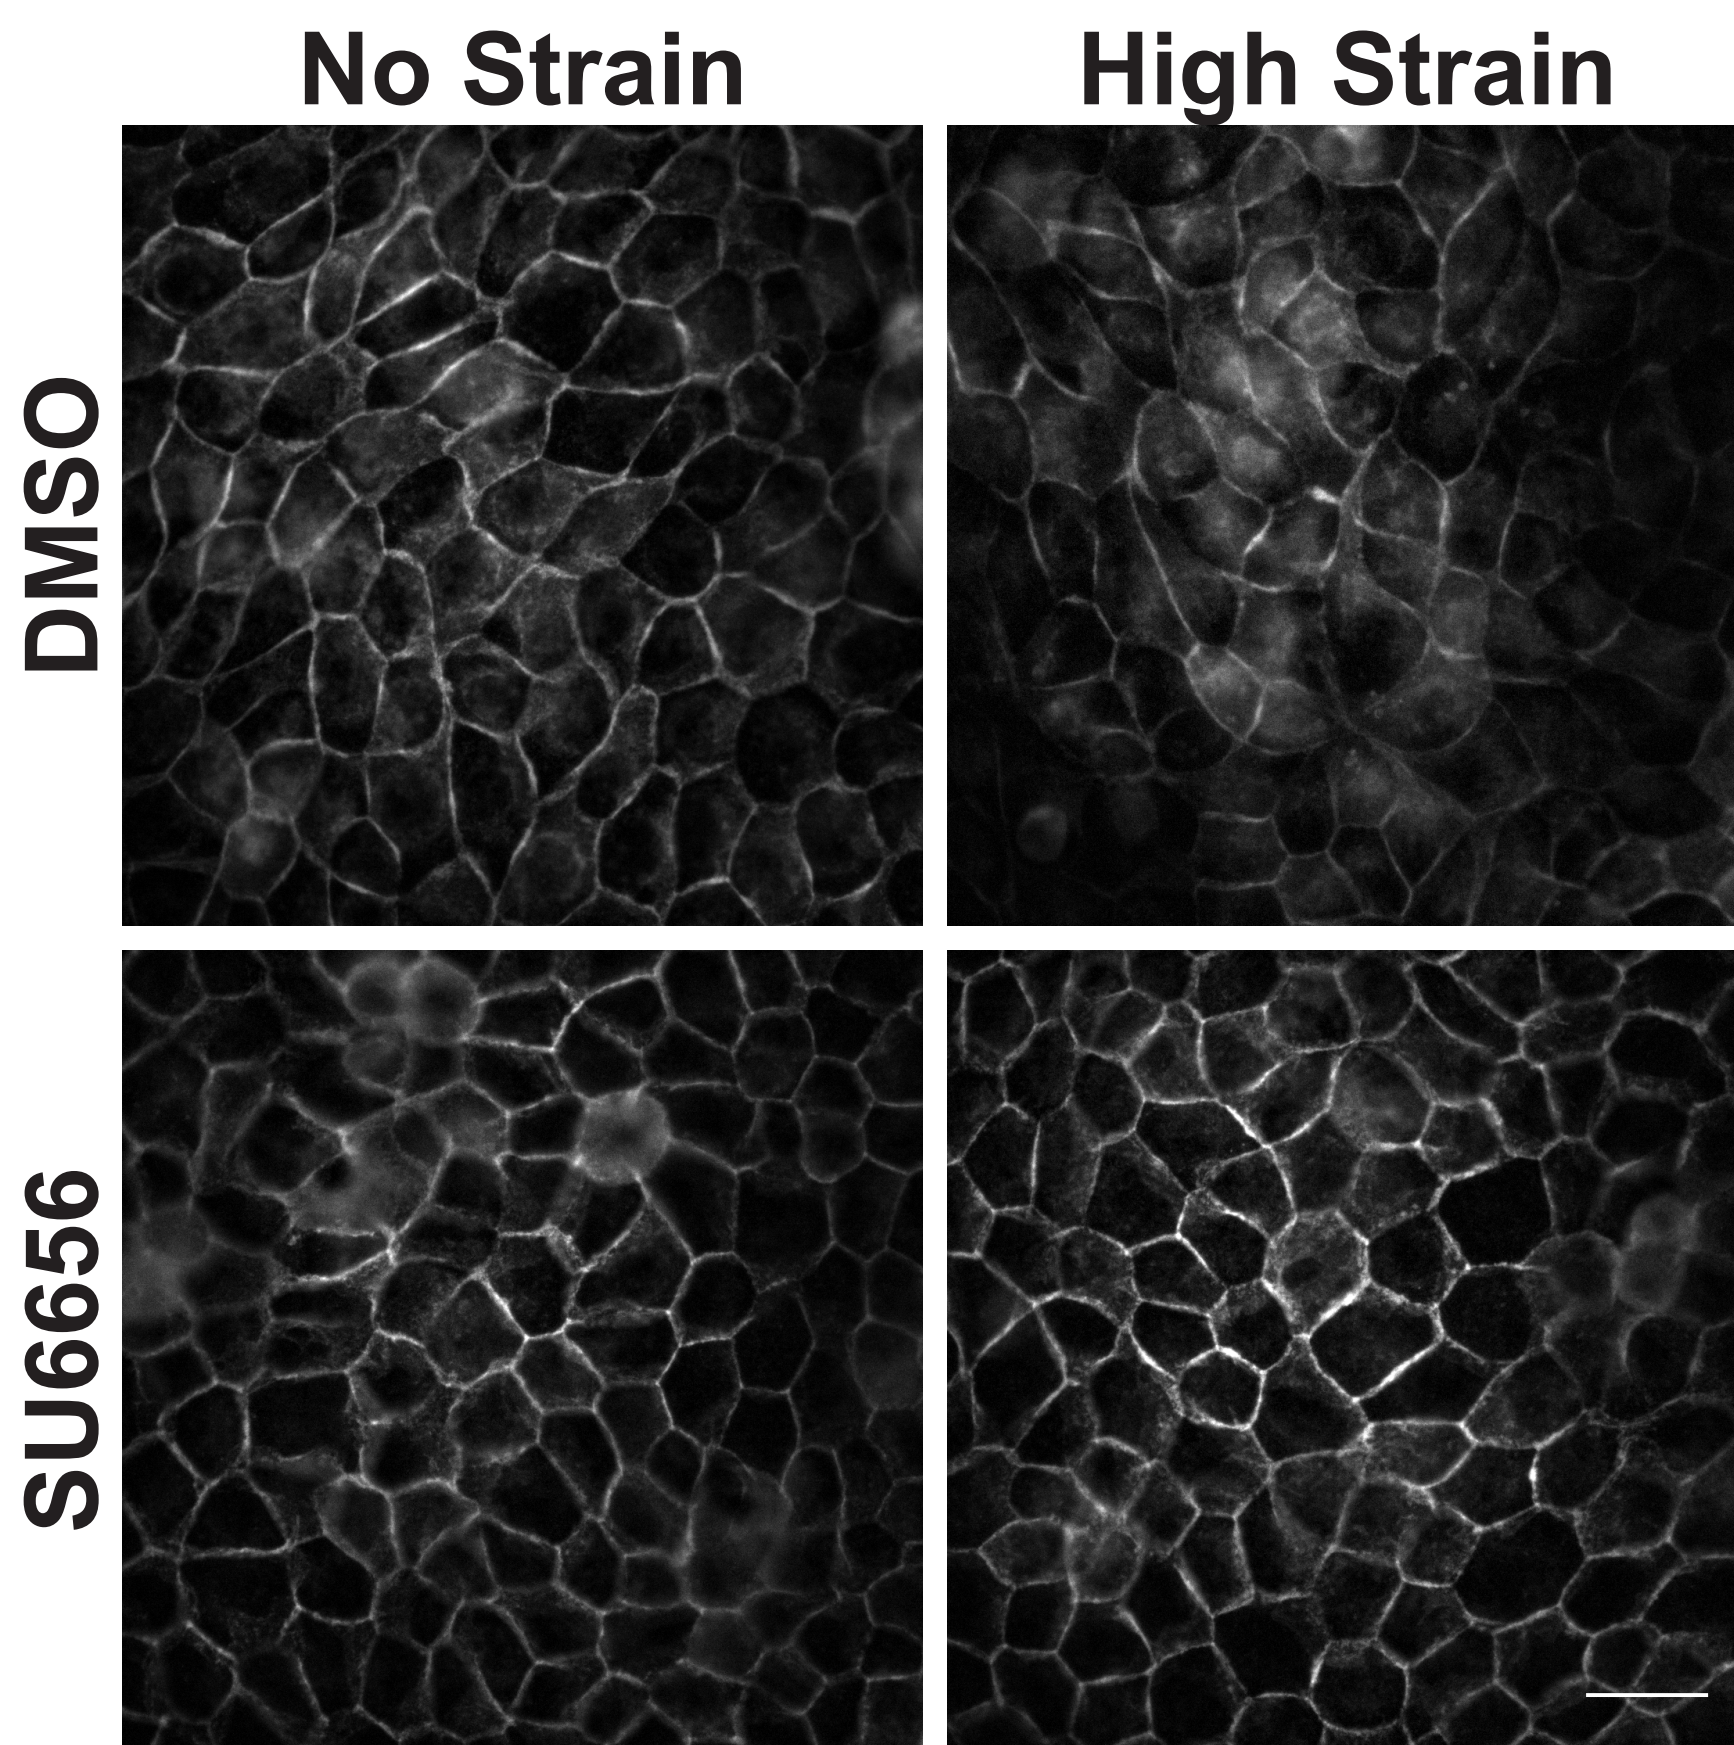

**Figure 3, Supplemental 1**

Supplement: supp [file elife-19799-supp-v1.zip]

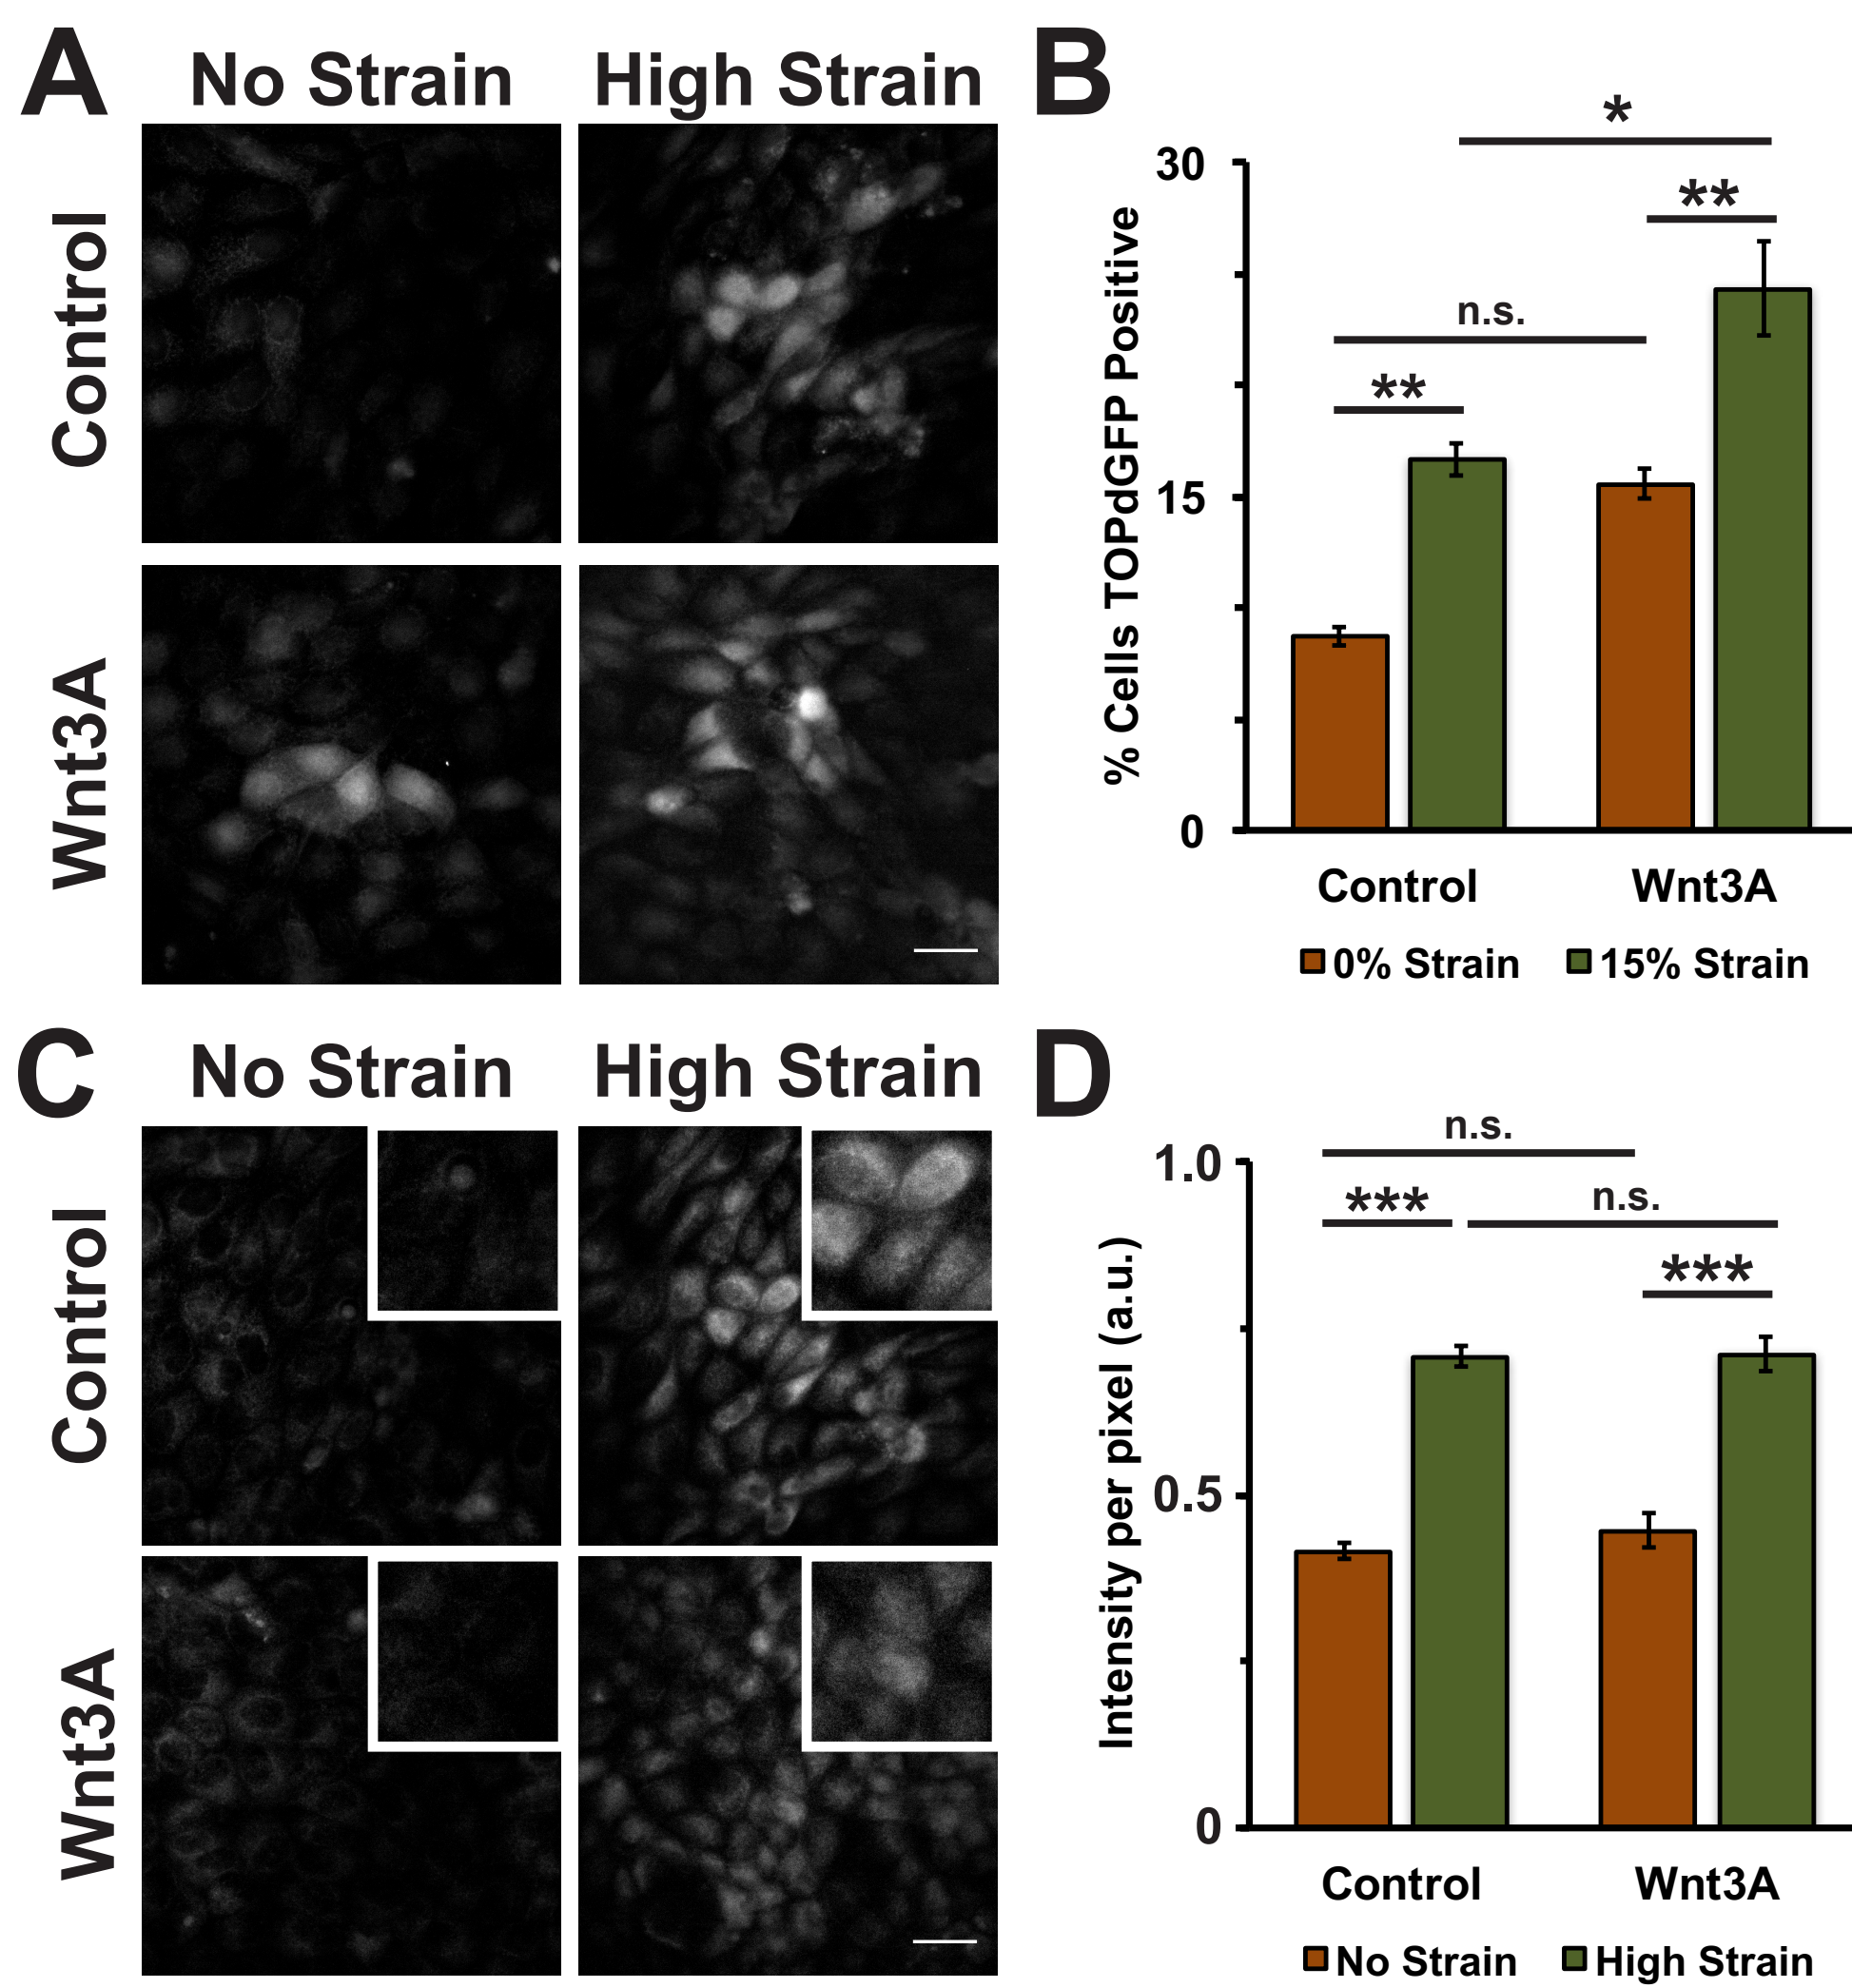

Figure 7, Supplemental 1

Supplement: supp [file elife-19799-supp-v1.zip › elife_poa_e19799_Figure_7_figure_supplement_1.pdf]

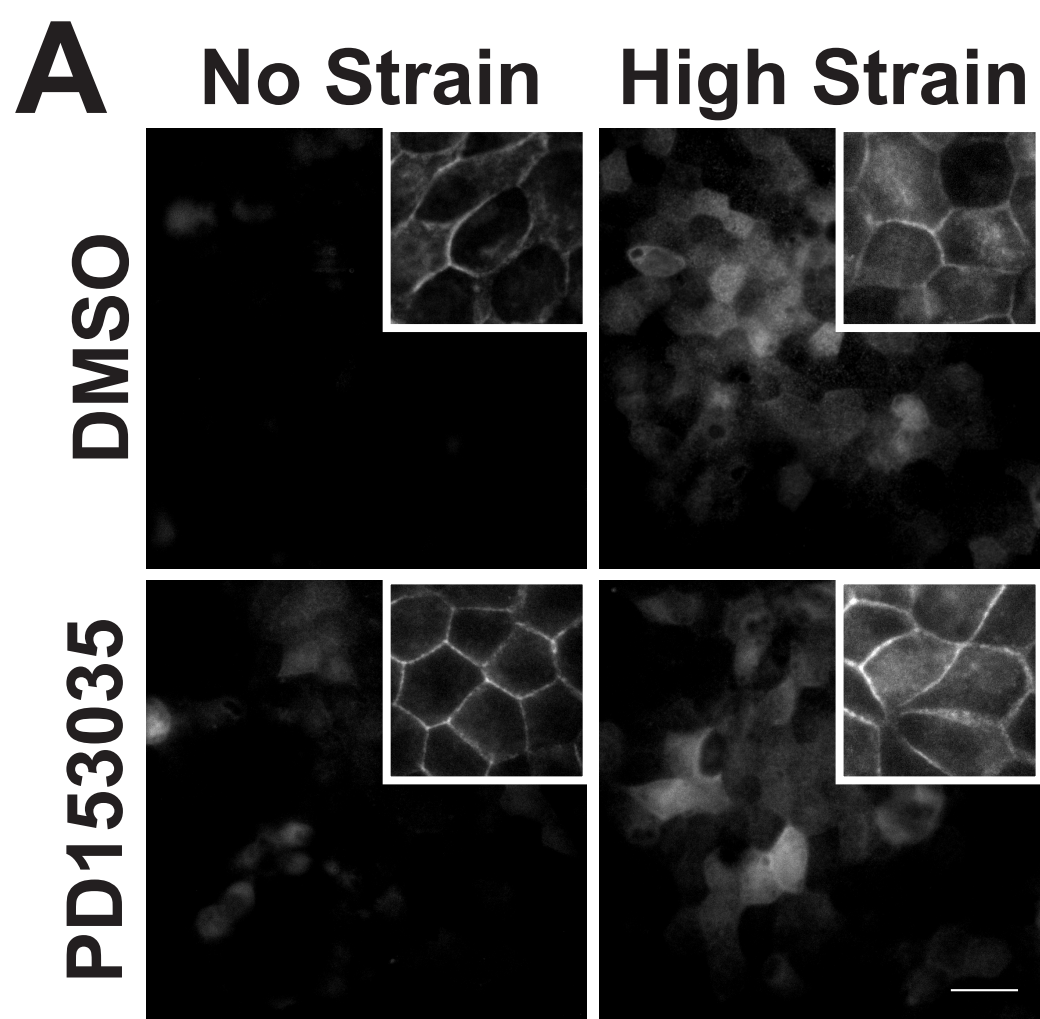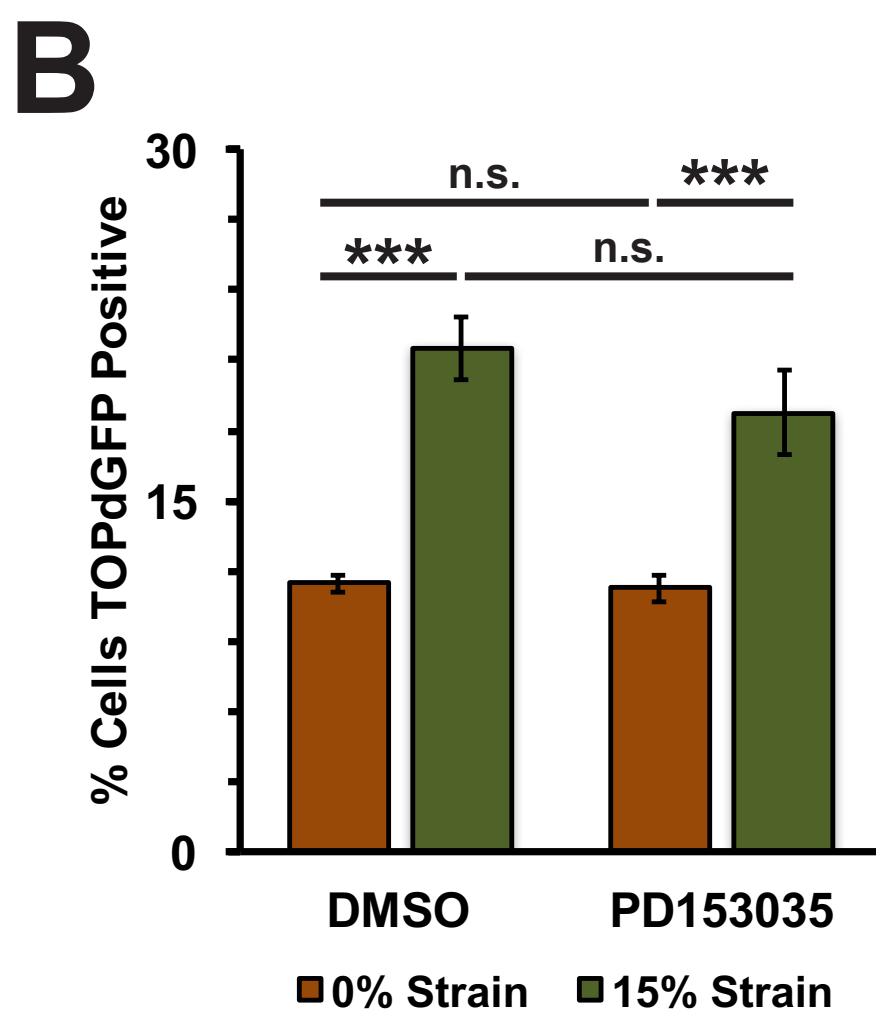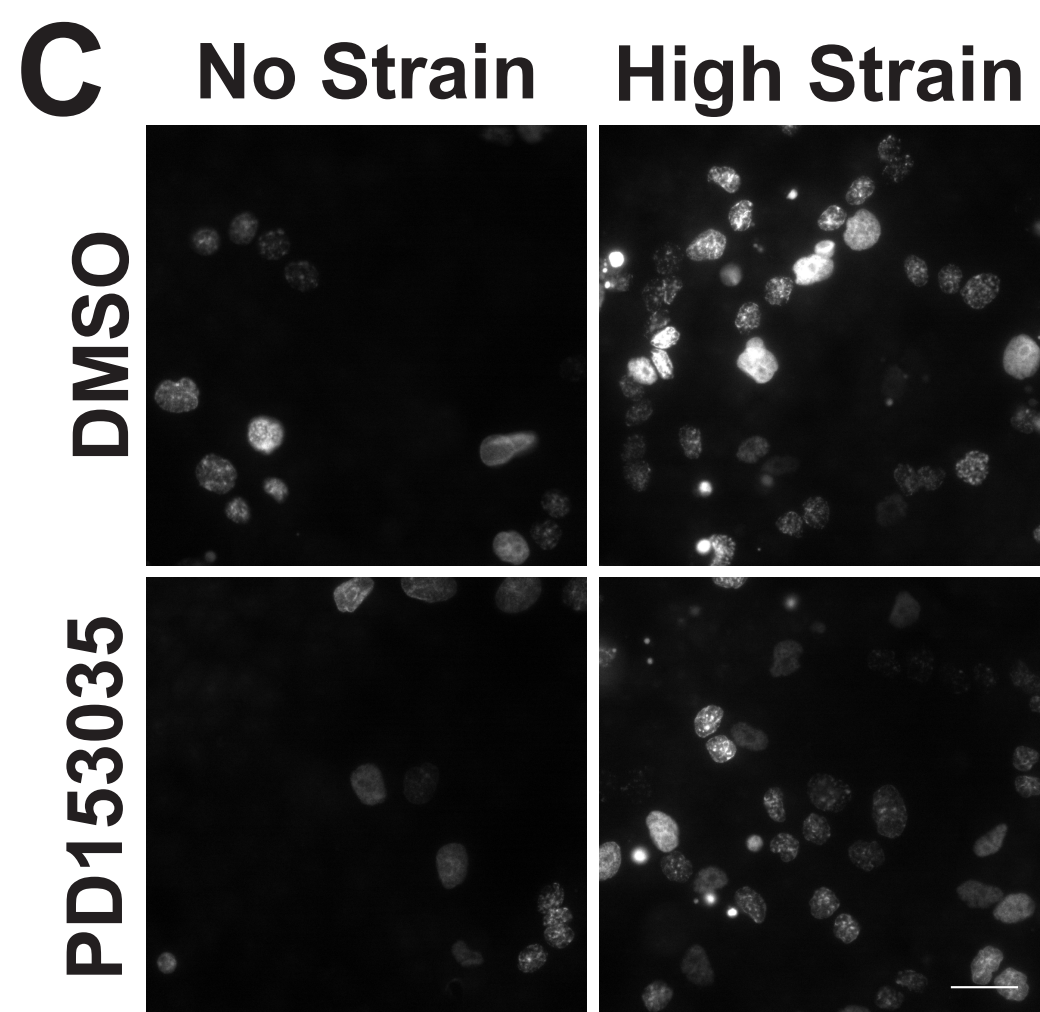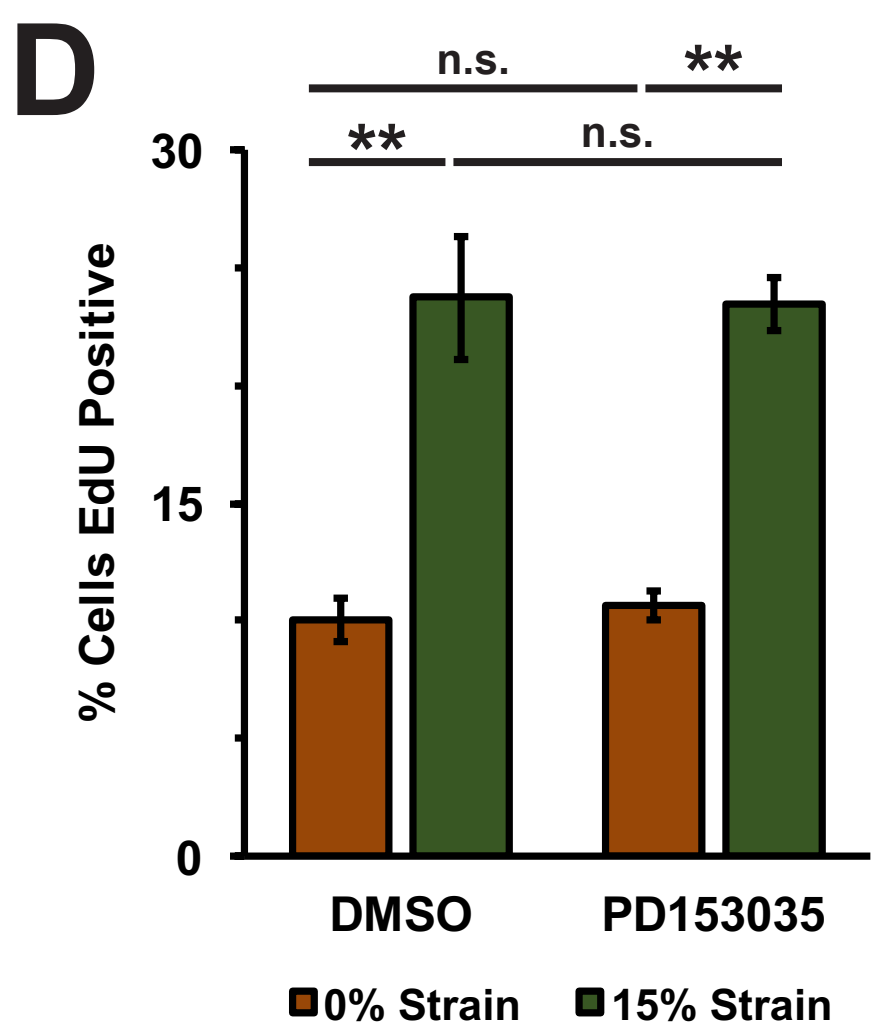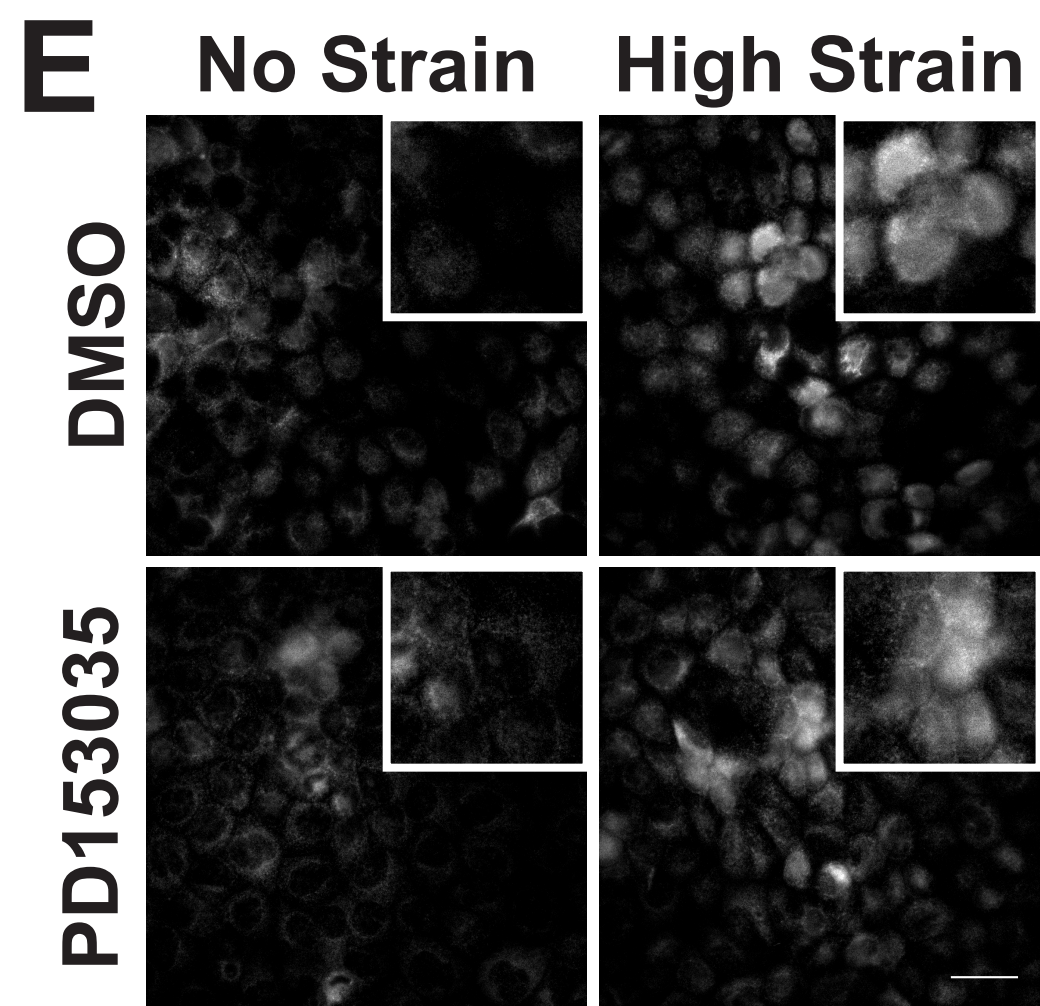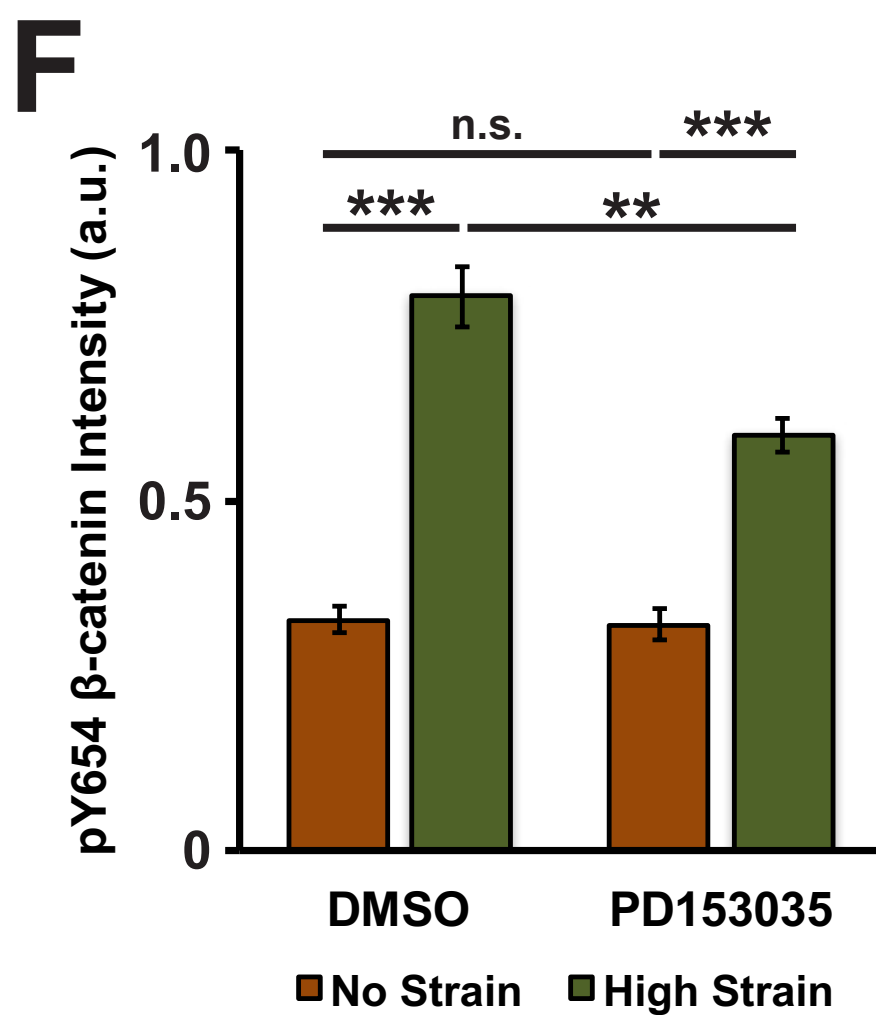

**Figure 3, Supplemental 4**

Supplement: supp [file elife-19799-supp-v1.zip › elife_poa_e19799_Figure_3_figure_supplement_4.pdf]
